# Supplementary material for: Artificial intelligence-driven pan-cancer analysis reveals miRNA signatures for cancer stage prediction
Source: PubMed Central journal article supplement — HGG Adv. 2023 Apr 3;4(3):100190. doi: 10.1016/j.xhgg.2023.100190 (PMC10130501; doi:10.1016/j.xhgg.2023.100190), 2023-04-03
Supplement: mmc1.pdf [file mmc1.pdf]

**HGGA, Volume 4**

**Supplemental information**

**Artificial intelligence-driven pan-cancer analysis  
reveals miRNA signatures for cancer stage prediction**

**Srinivasulu Yerukala Sathipati, Ming-Ju Tsai, Sanjay K. Shukla, and Shinn-Ying Ho**

# Supplementary information

## Supplementary Figures

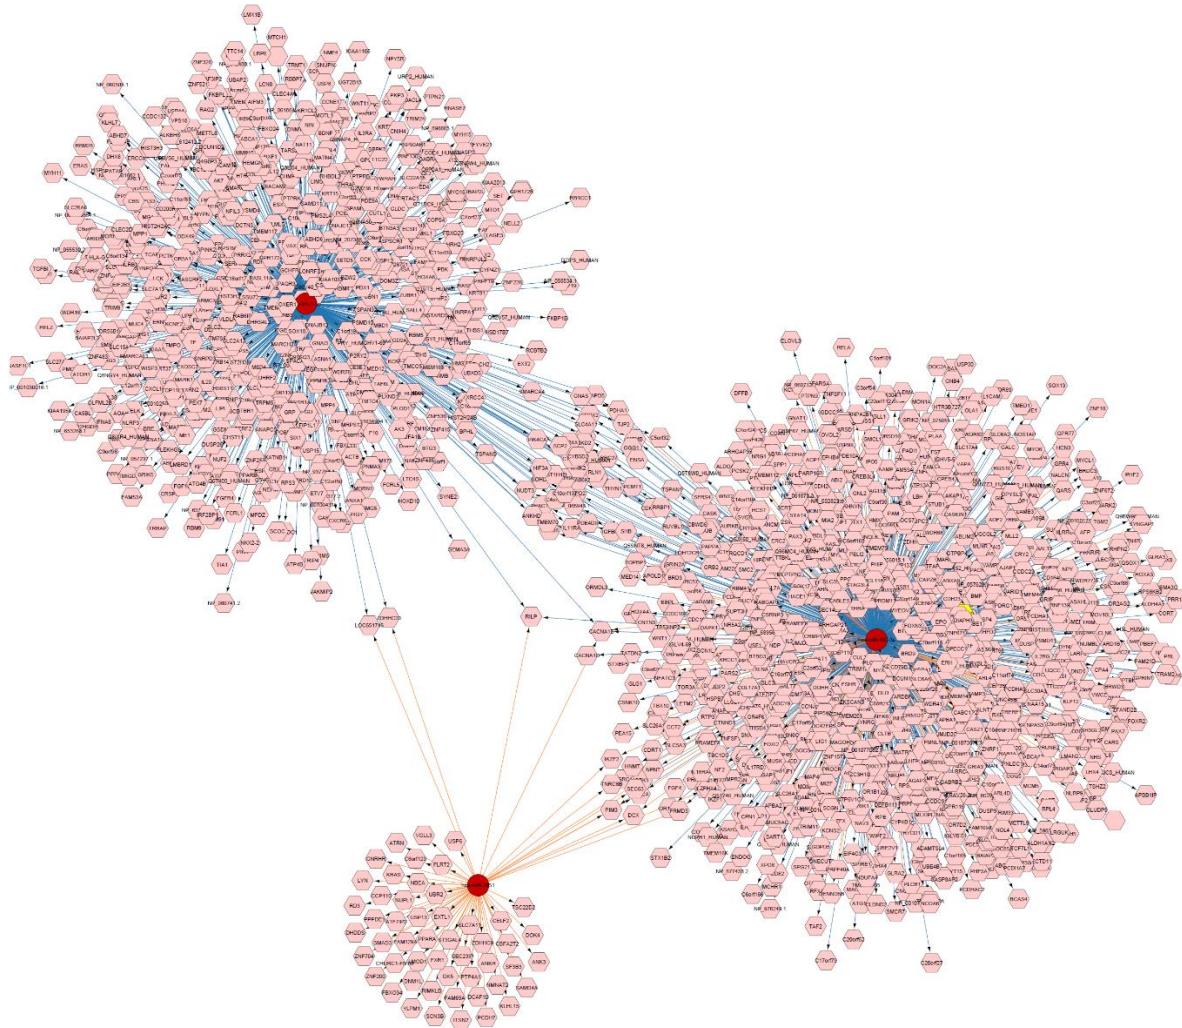

**Supplementary Figure S1.** Three miRNAs and corresponding target genes predicted using MicroCosm, miRTar base, and TargetScan. In this network microRNAs and target genes are defined as red circles and pink rounded hexagons respectively. The predicted microRNA-Target interactions are visualized in blue and in orange color.

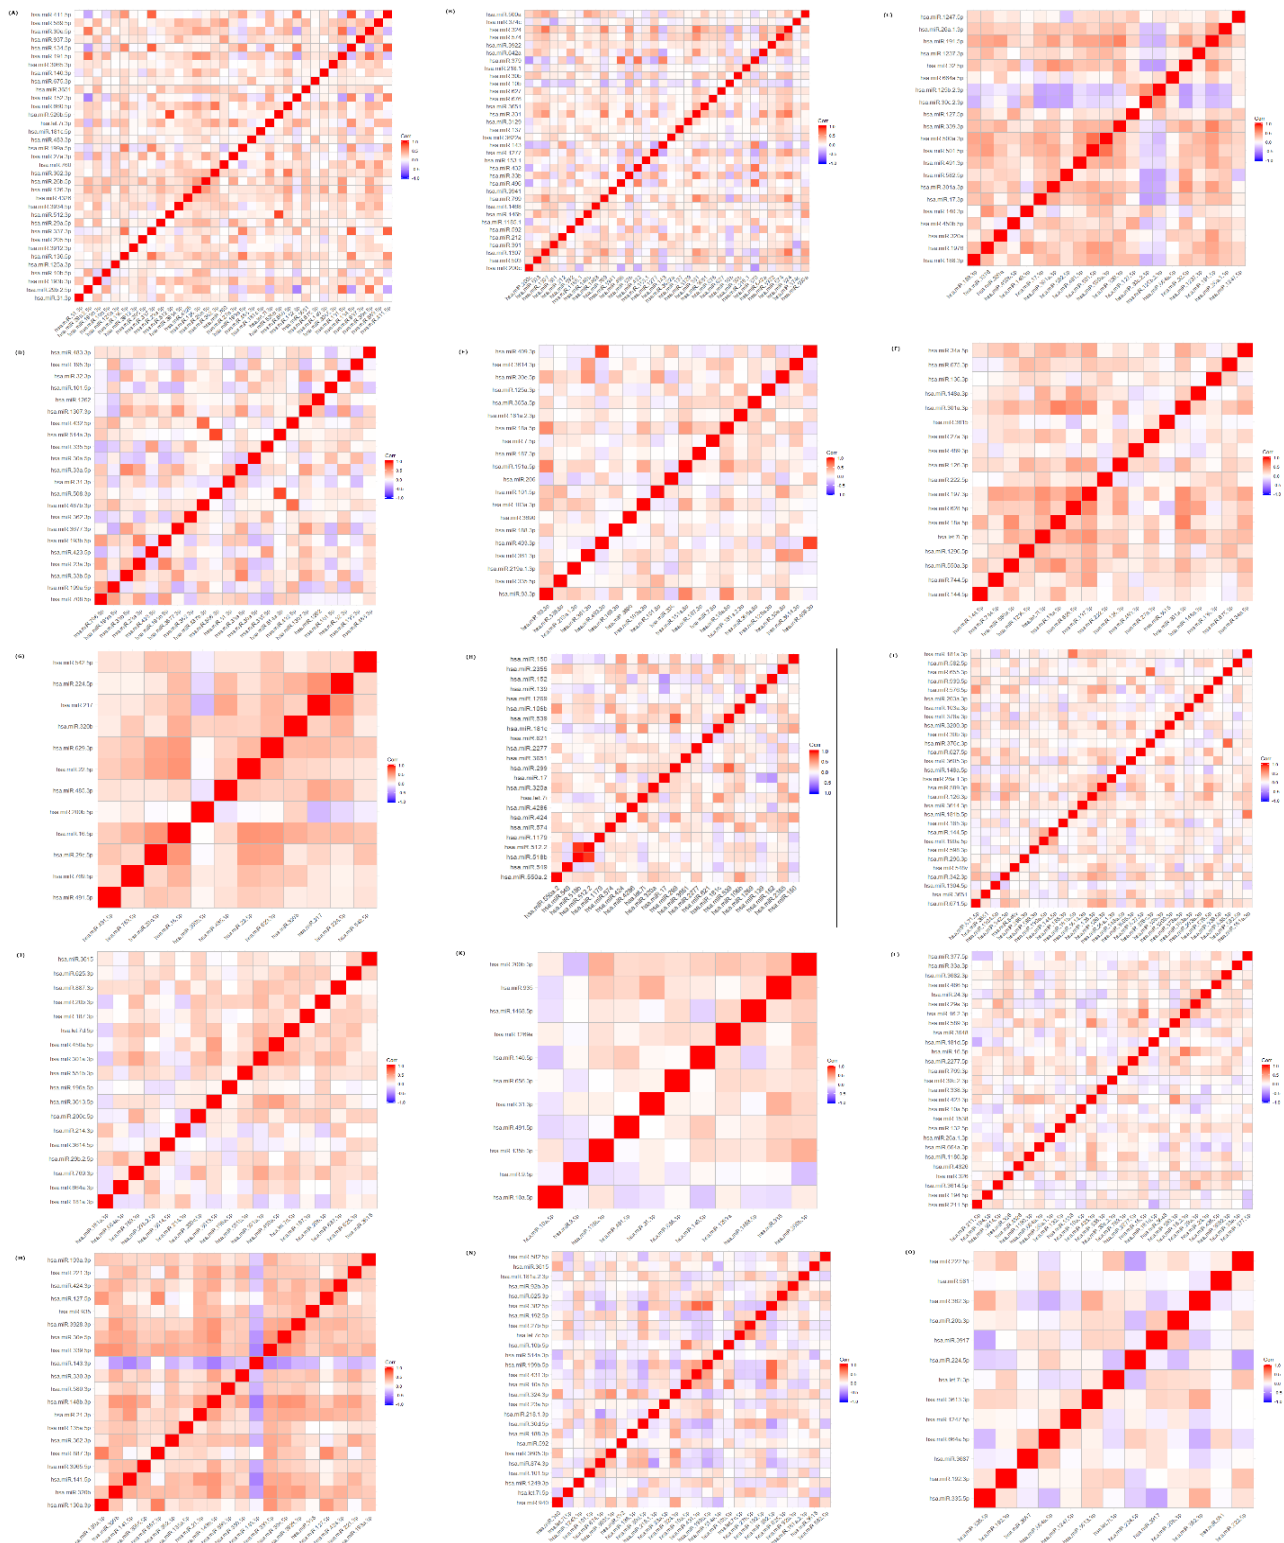

**Supplementary Figure S2.** Co-expression analysis of miRNA signatures across 15 cancers. (A) BLCA, (B) BRCA, (C) COAD, (D) ESCA, (E) HNSC, (F) KIRC, (G) KIRP, (H) LIHCC, (I) LUAD, (J) LUSC, (K) READ, (L) SKCM, (M) STAD, (N) THCA, and (O) UVM.

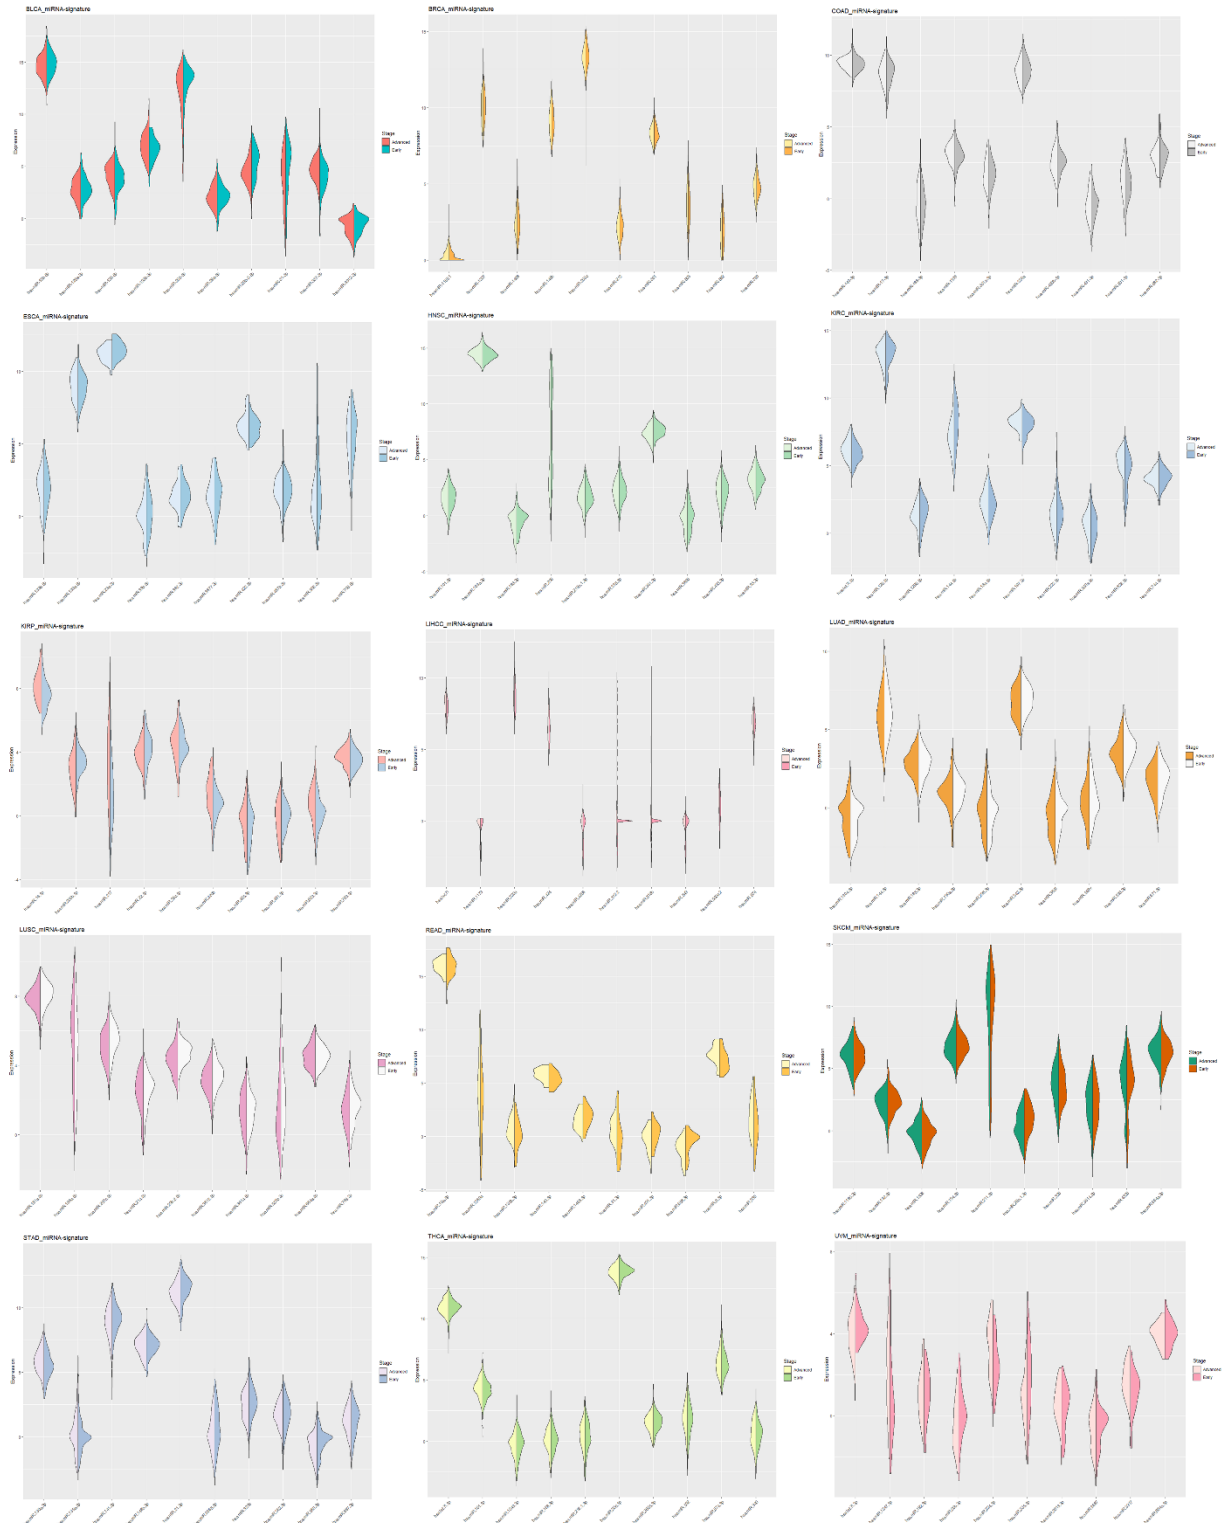

**Supplementary Figure S3. Expression difference analysis of the miRNA signatures across 15 cancers.** Relative expression differences of the miRNA signatures between early and advanced stages across cancers.

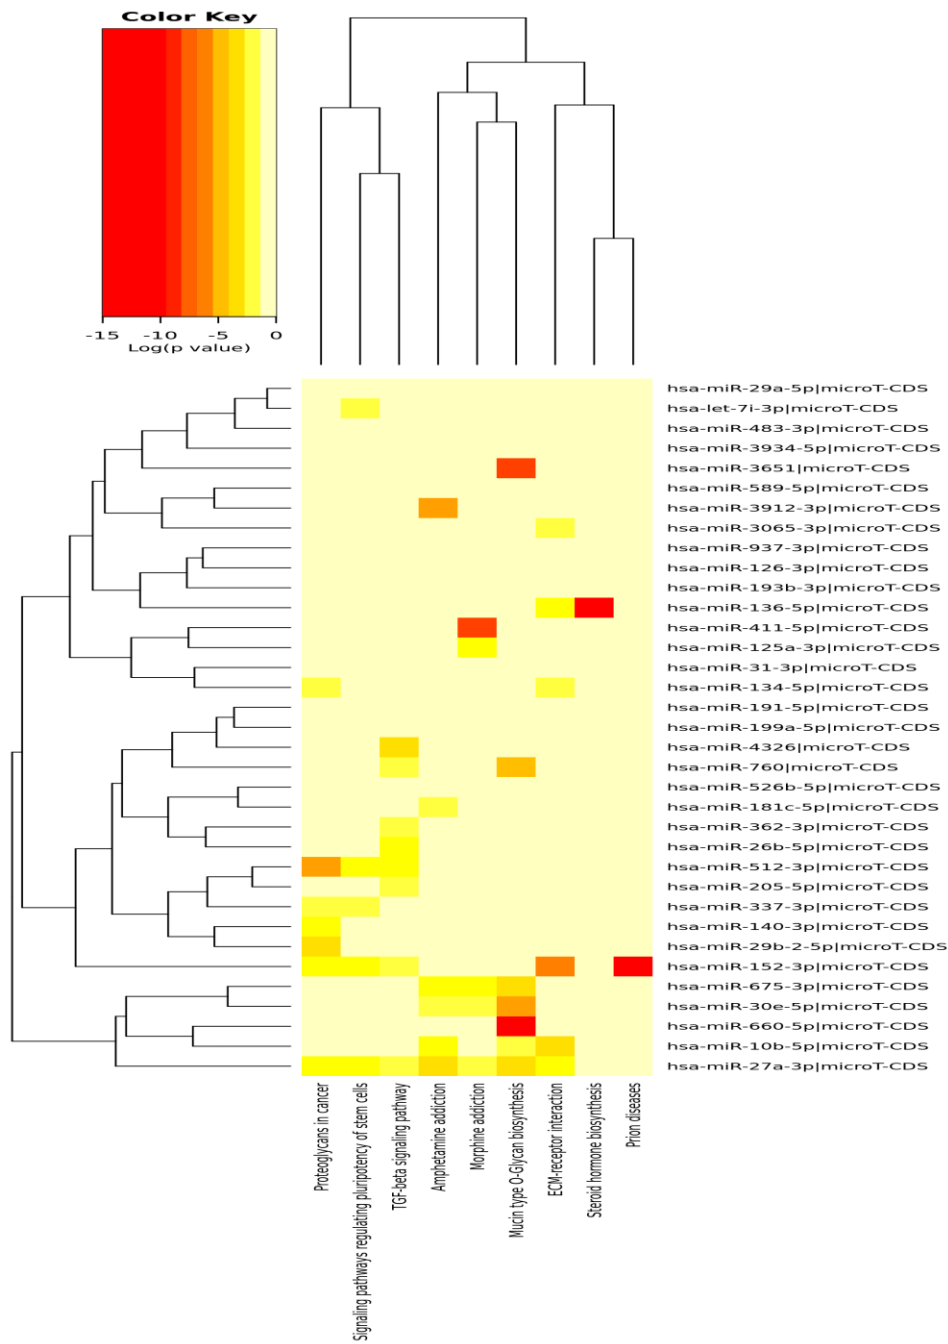

**Supplementary Figure S4.1.** KEGG pathway enrichment analysis of miRNA signatures in BLCA

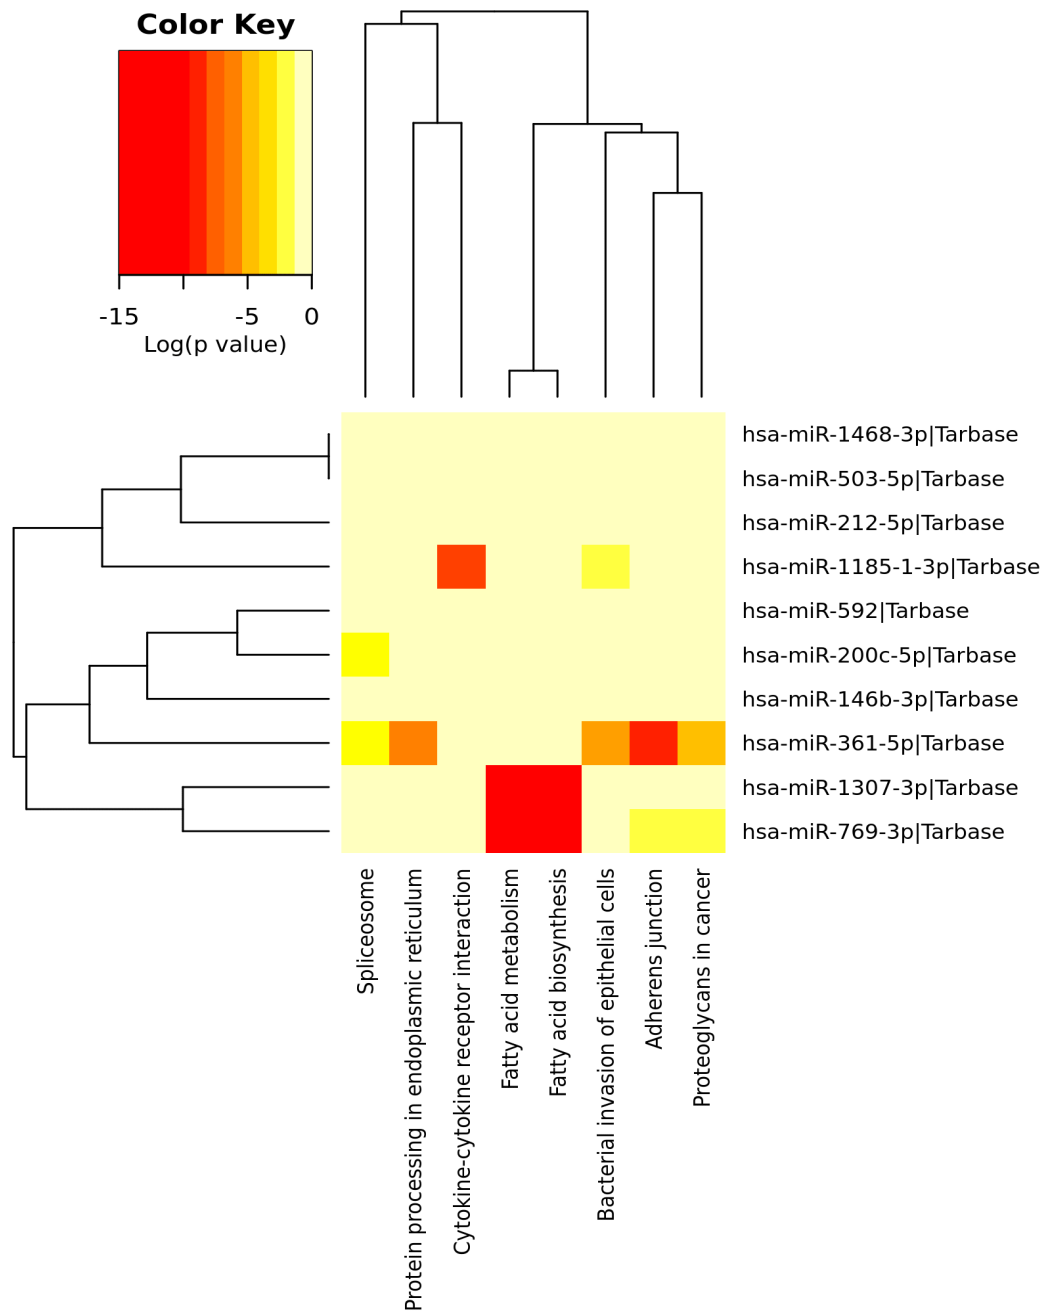

**Supplementary Figure S4.2.** KEGG pathway enrichment analysis of miRNA signatures in BRCA

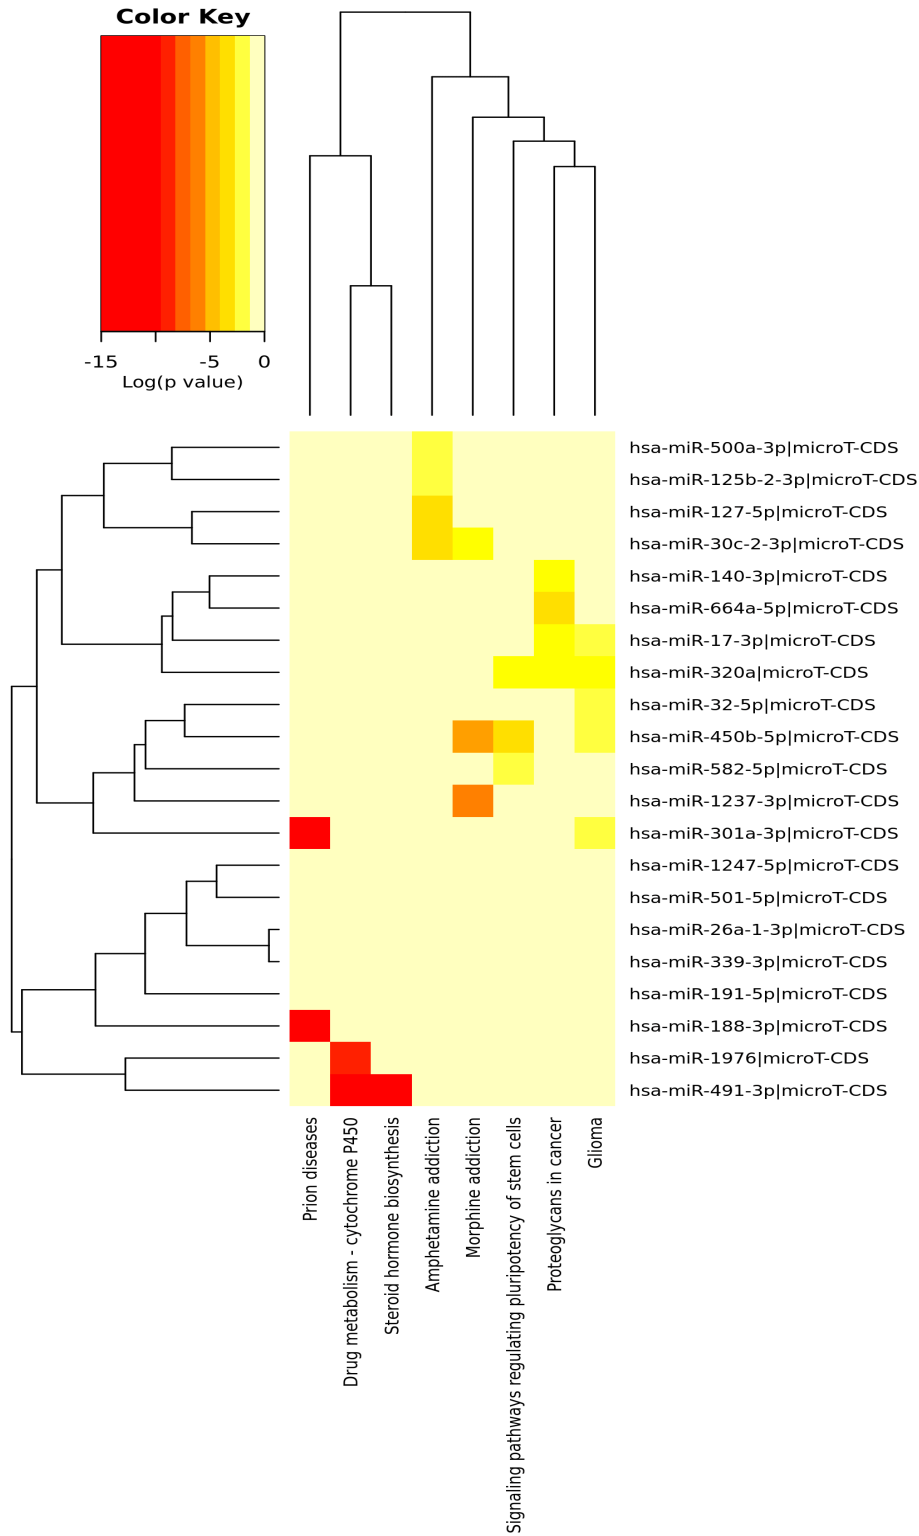

**Supplementary Figure S4.3.** KEGG pathway enrichment analysis of miRNA signatures in COAD

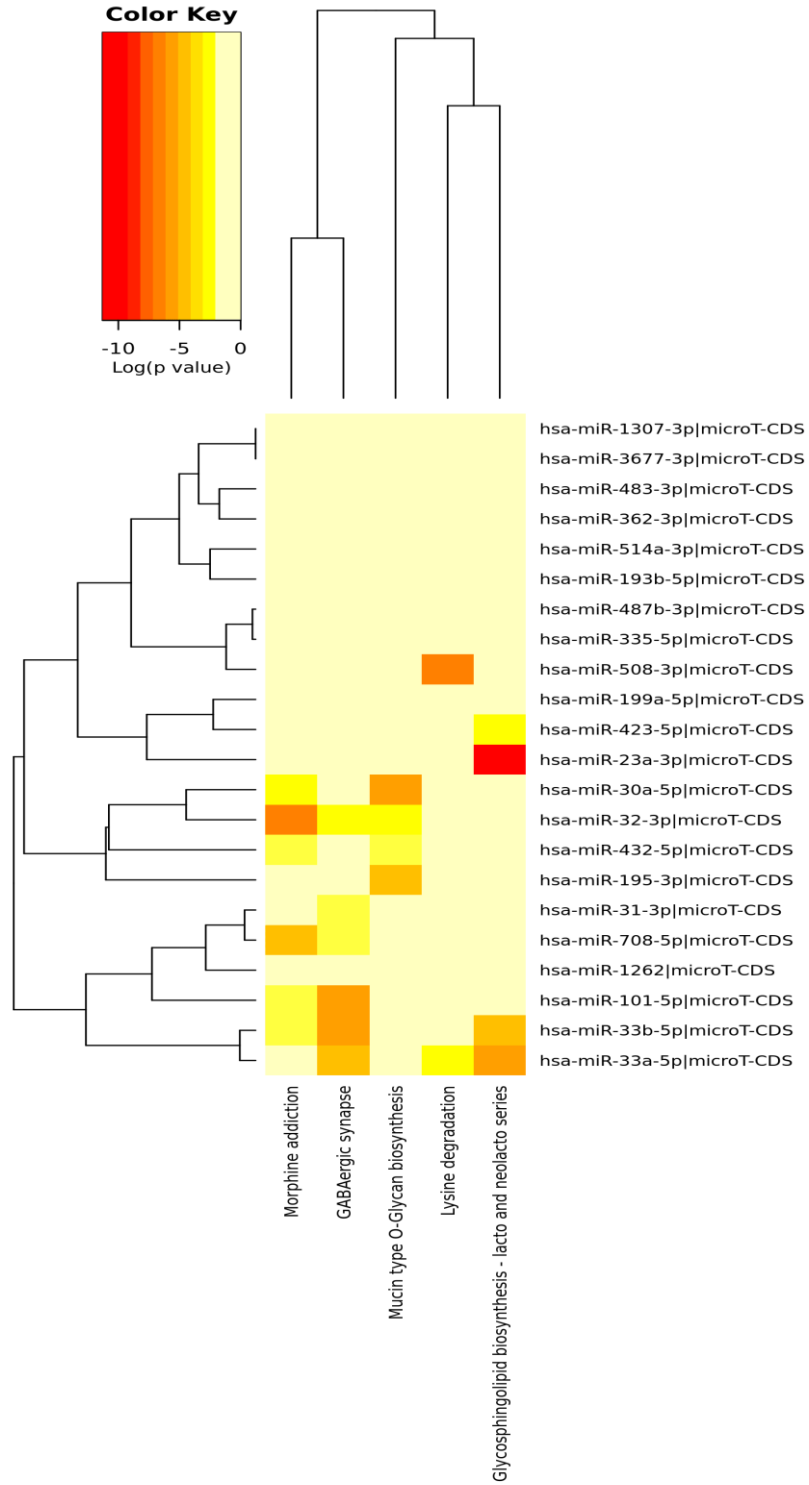

**Supplementary Figure S4.4.** KEGG pathway enrichment analysis of miRNA signatures in ESCA



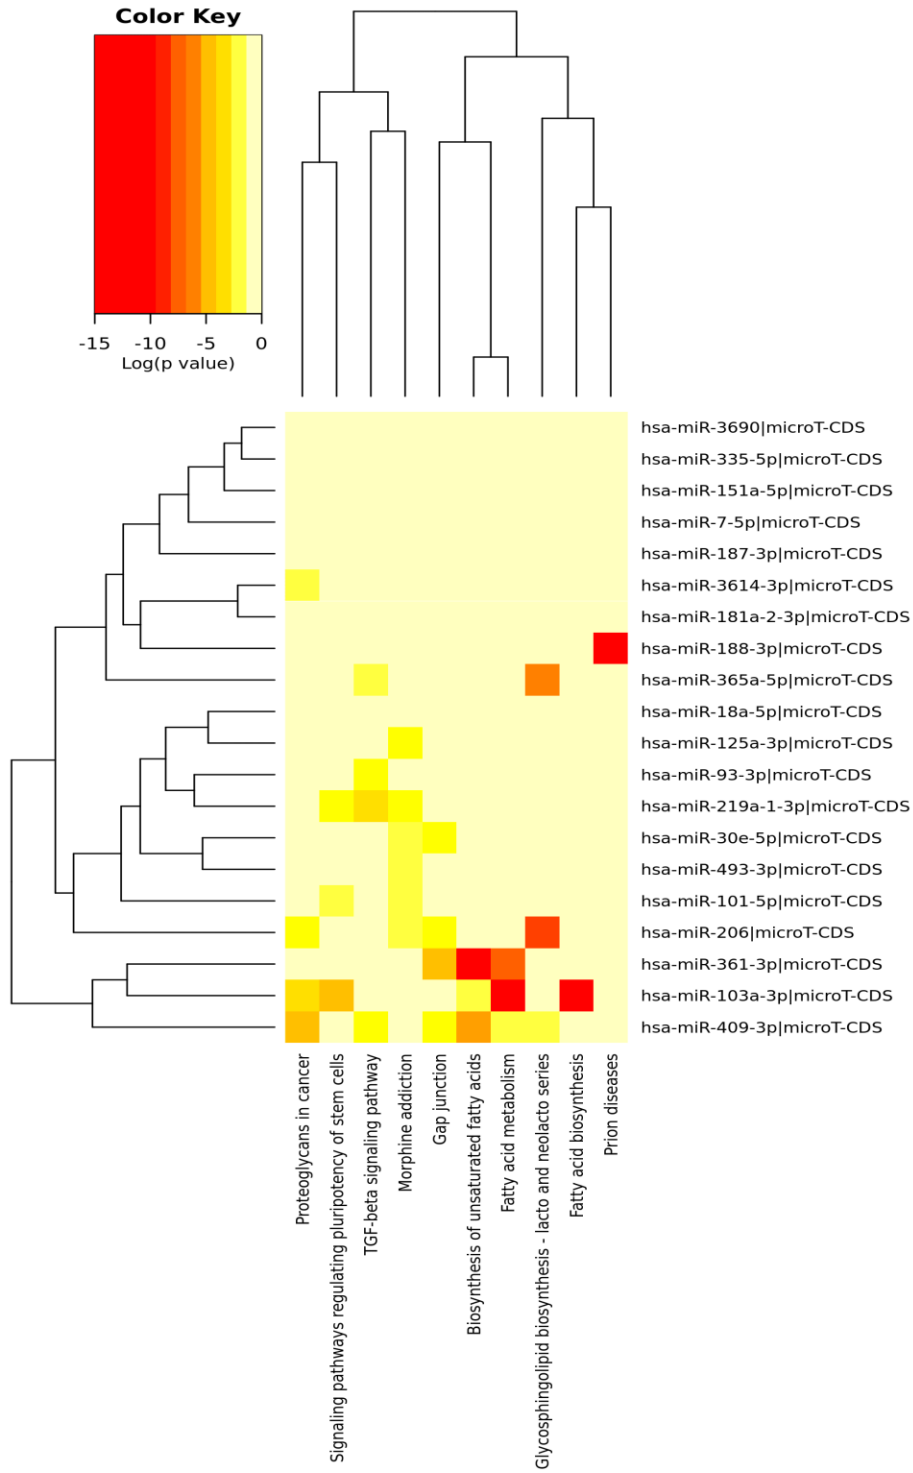

**Supplementary Figure S4.5.** KEGG pathway enrichment analysis of miRNA signatures in HNSC

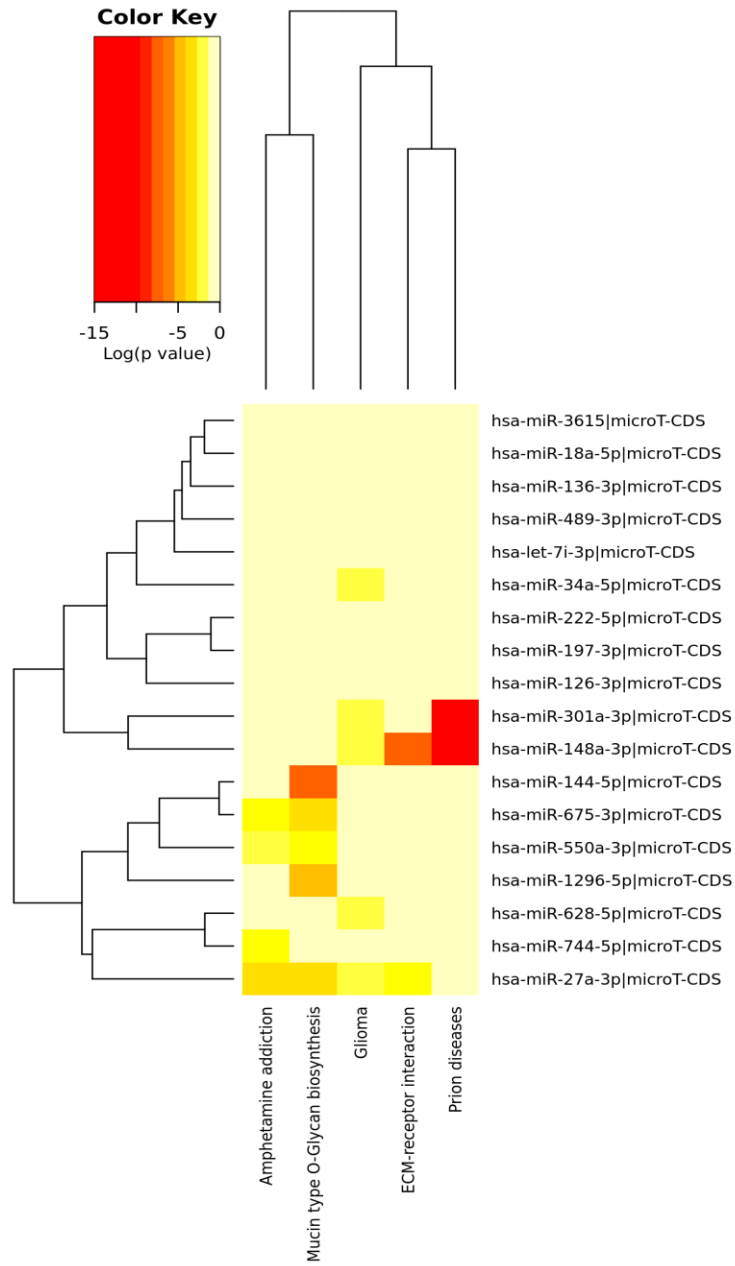

**Supplementary Figure S4.6.** KEGG pathway enrichment analysis of miRNA signatures in KIRC

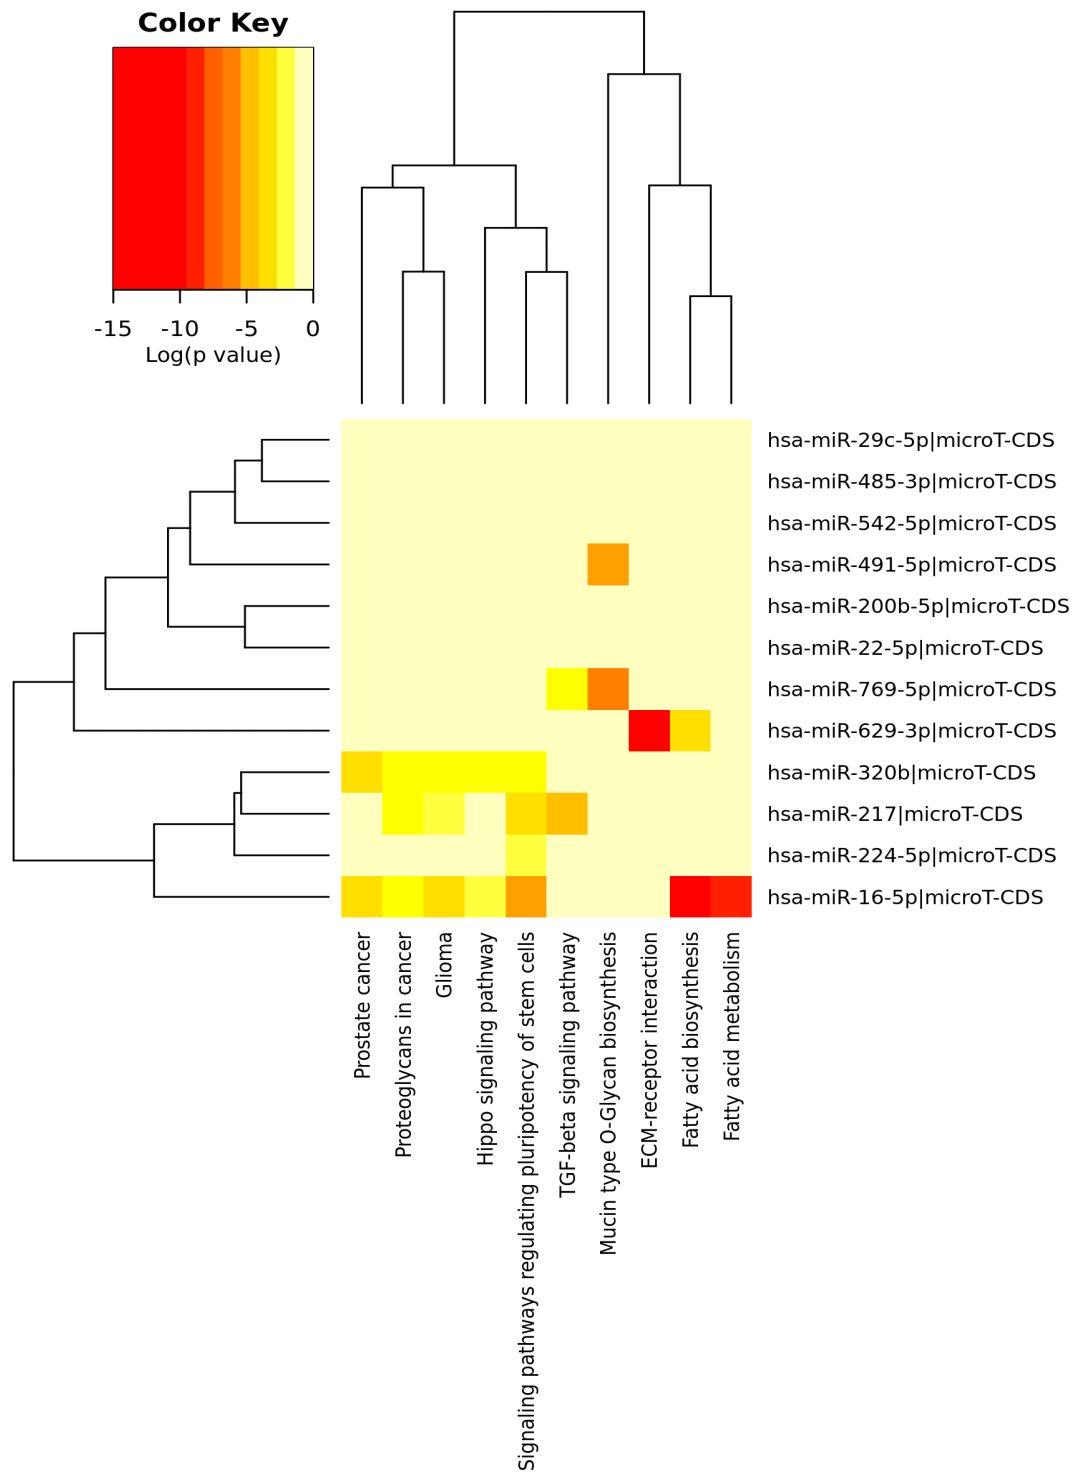

**Supplementary Figure S4.7.** KEGG pathway enrichment analysis of miRNA signatures in KIRP

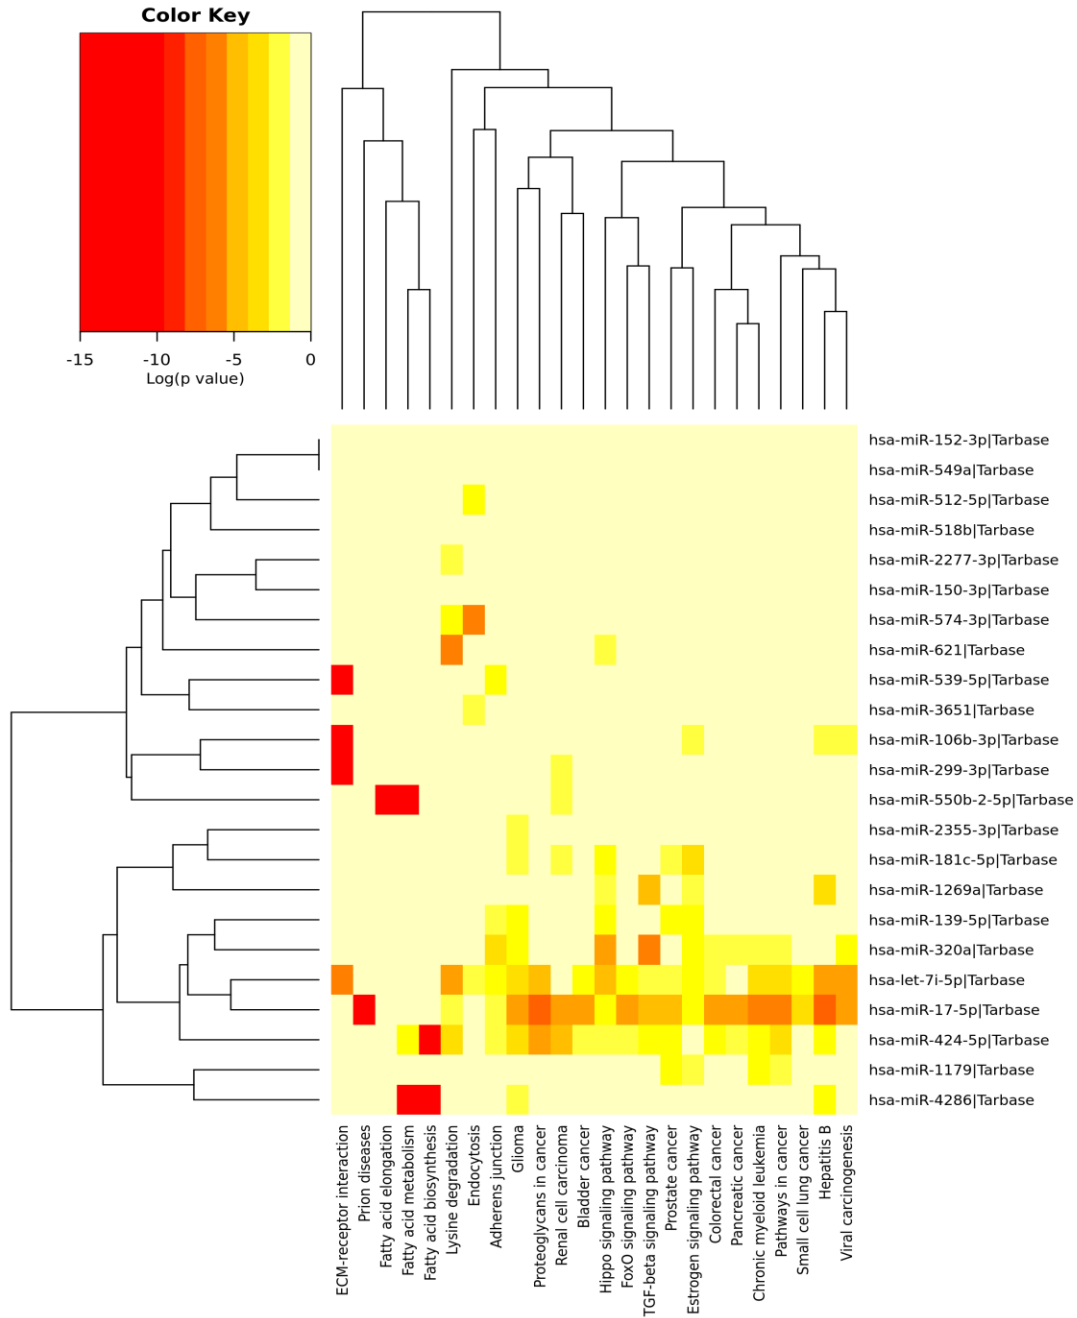

**Supplementary Figure S4.8.** KEGG pathway enrichment analysis of miRNA signatures in LIHC

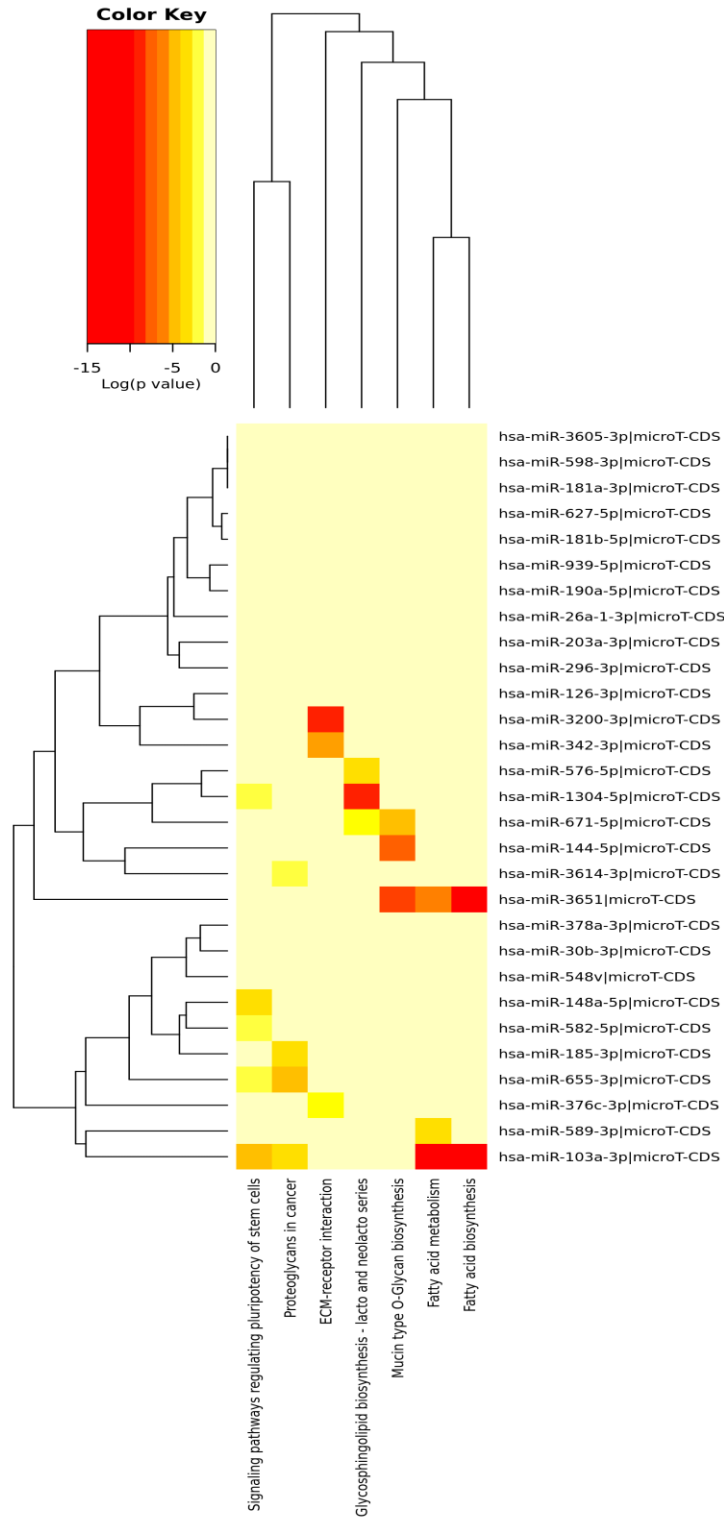

**Supplementary Figure S4.9.** KEGG pathway enrichment analysis of miRNA signatures in LUAD

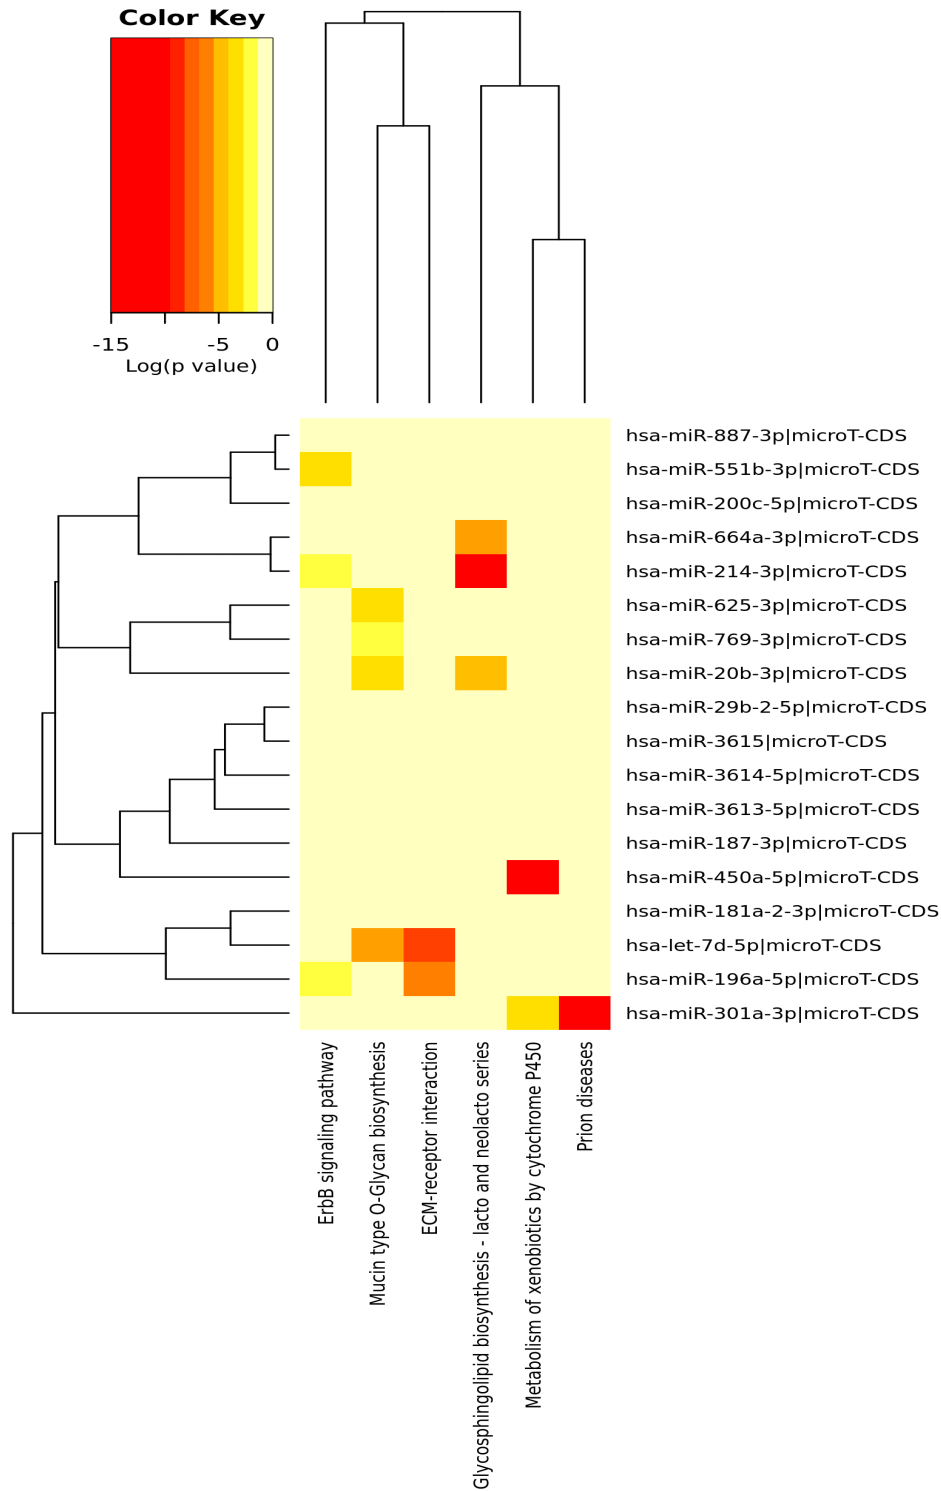

**Supplementary Figure S4.10.** KEGG pathway enrichment analysis of miRNA signatures in LUSC

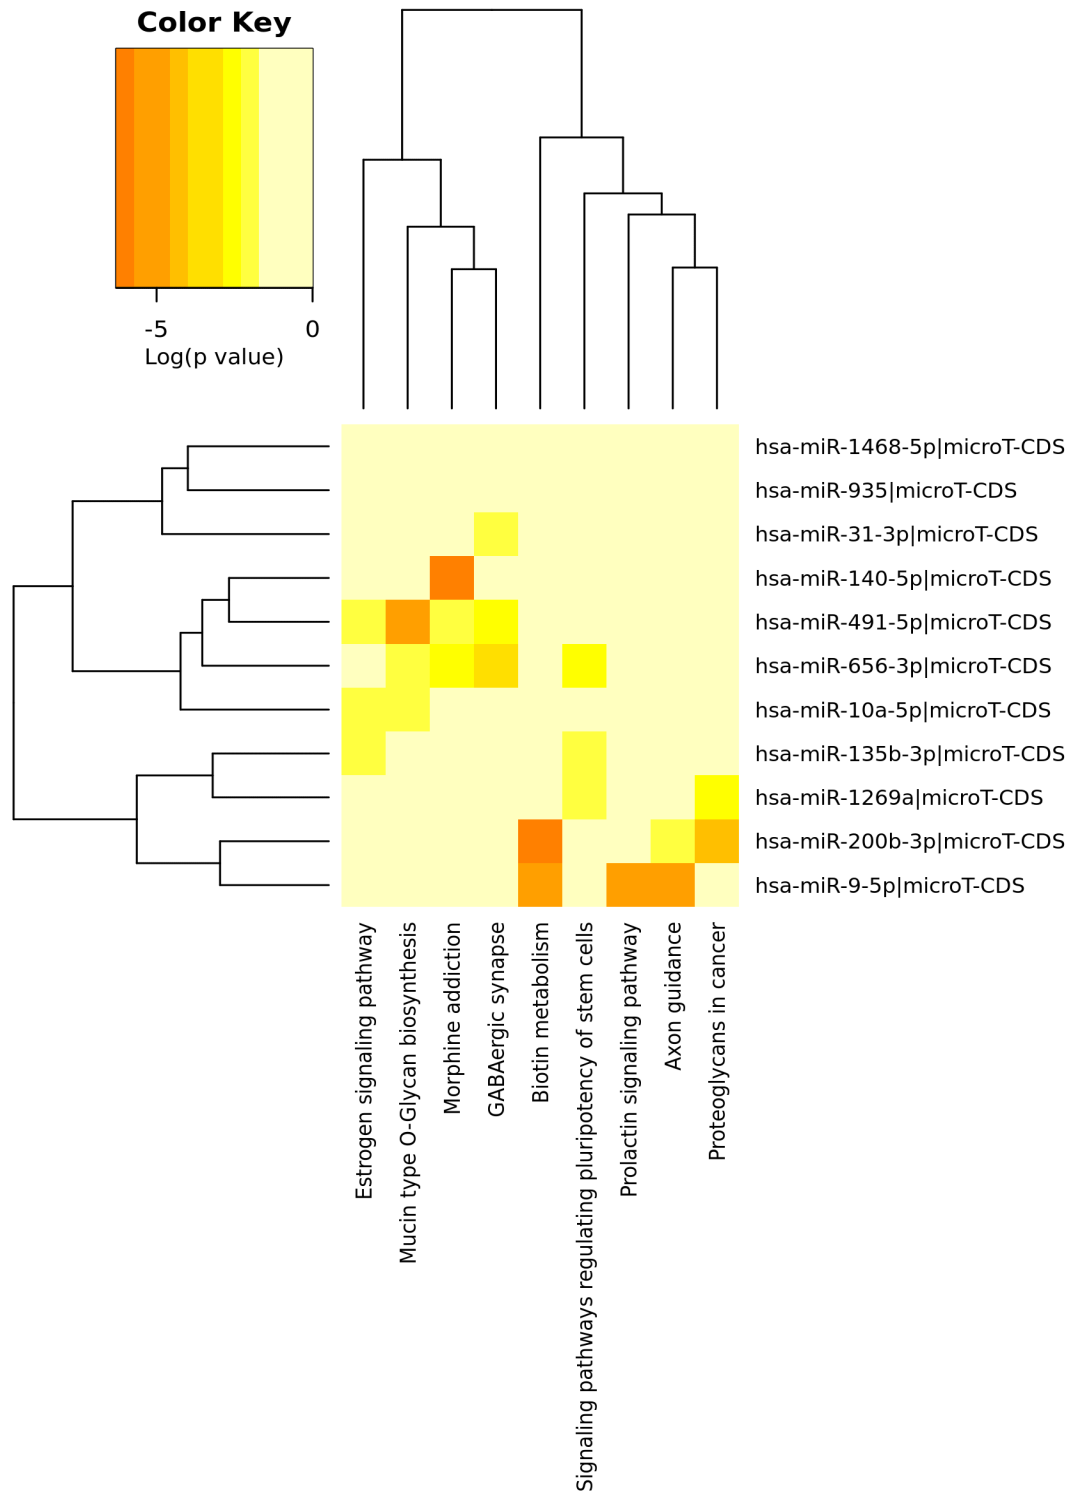

**Supplementary Figure S4.11.** KEGG pathway enrichment analysis of miRNA signatures in READ

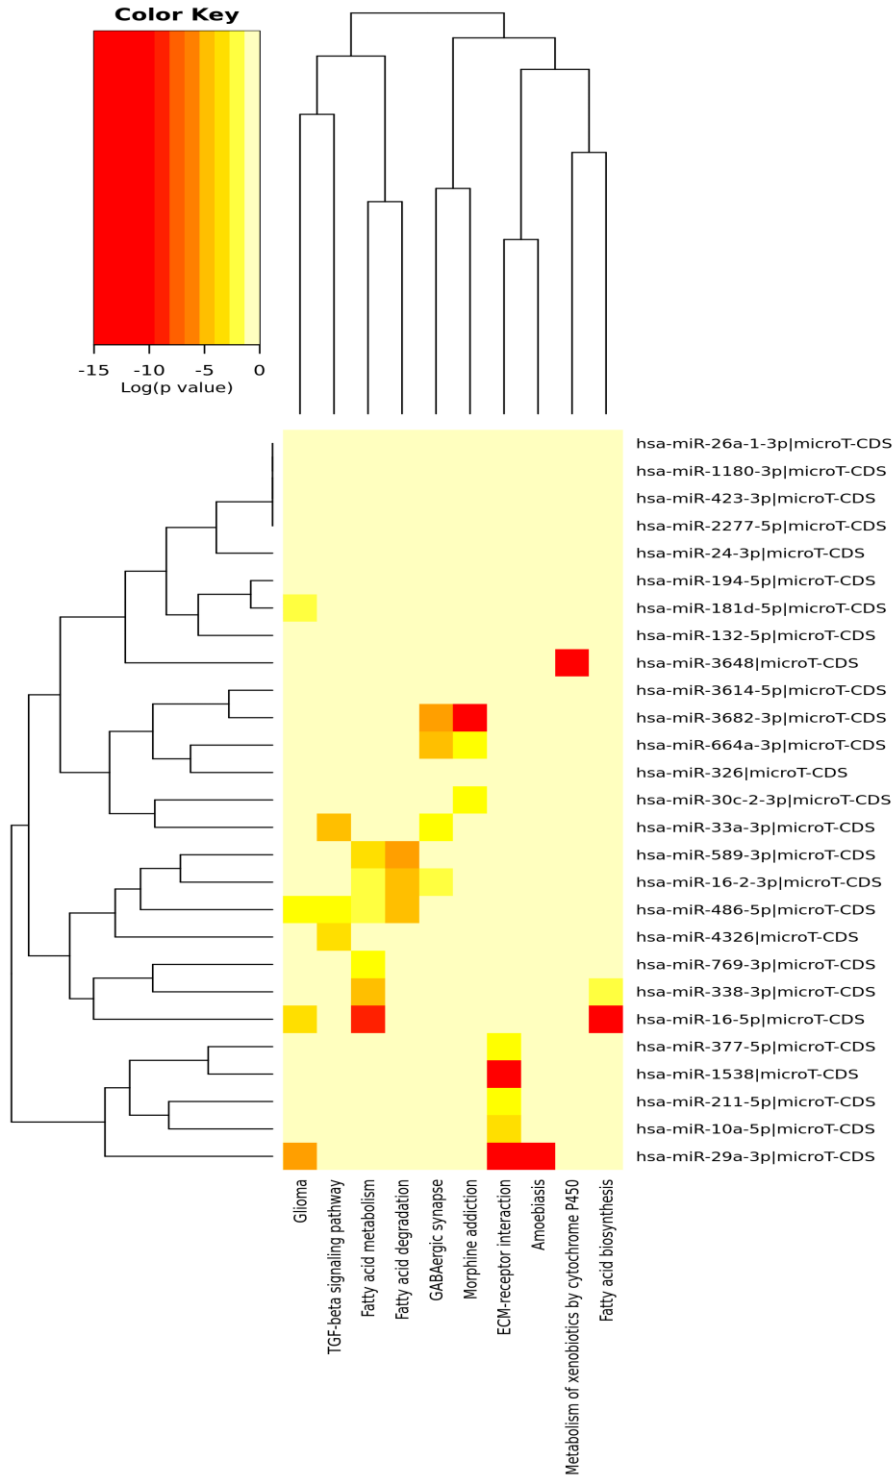

**Supplementary Figure S4.12.** KEGG pathway enrichment analysis of miRNA signatures in SKCM



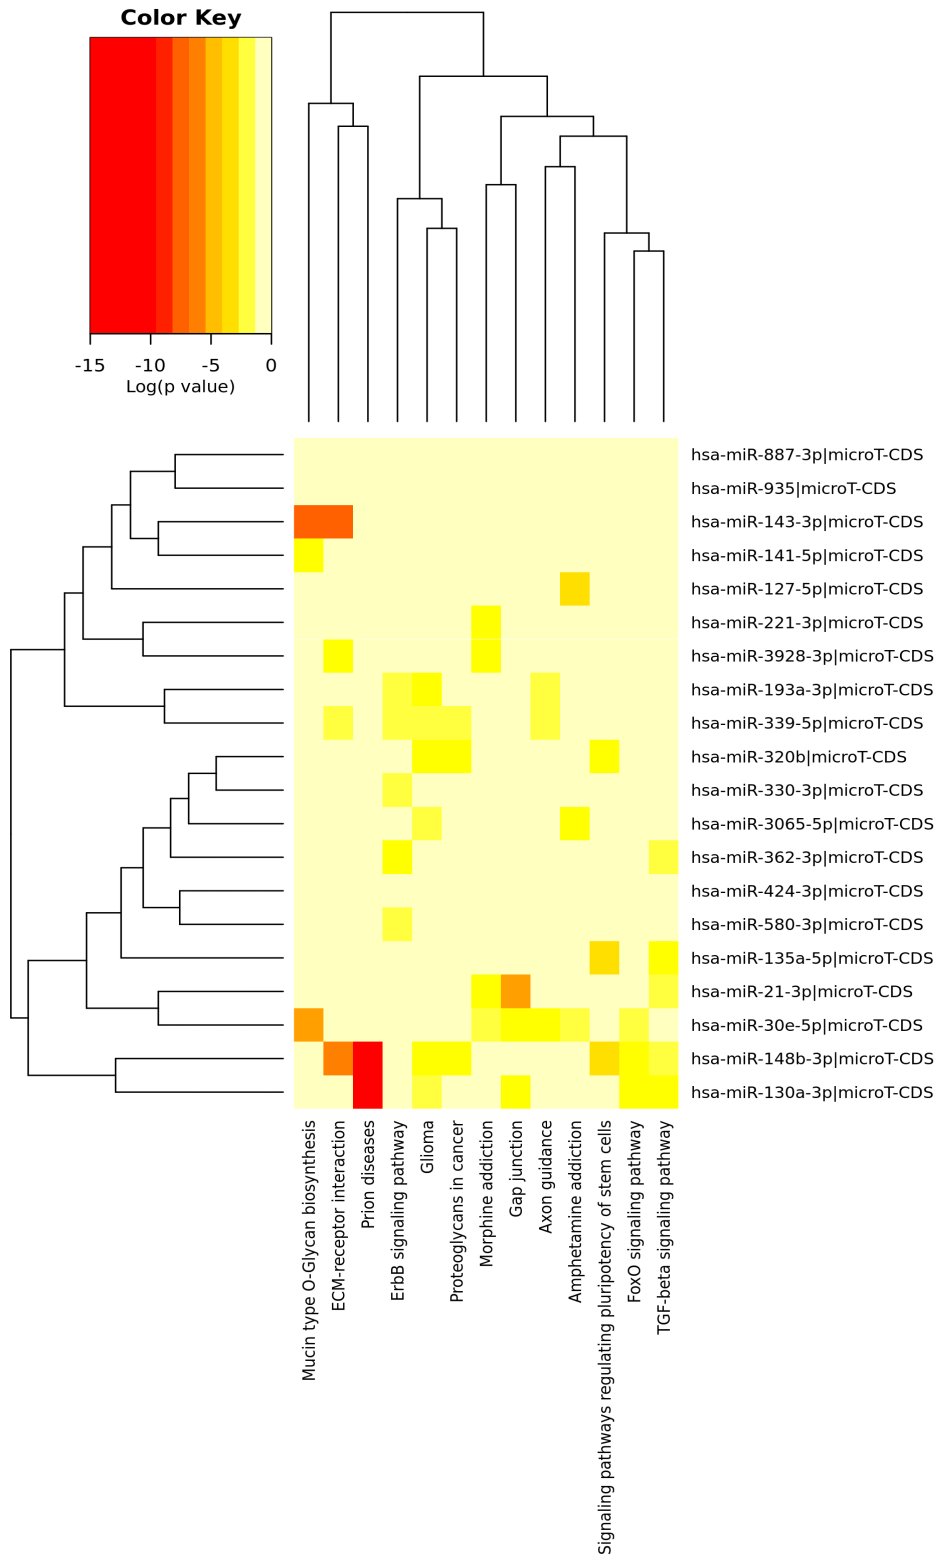

**Supplementary Figure S4.13.** KEGG pathway enrichment analysis of miRNA signatures in STAD

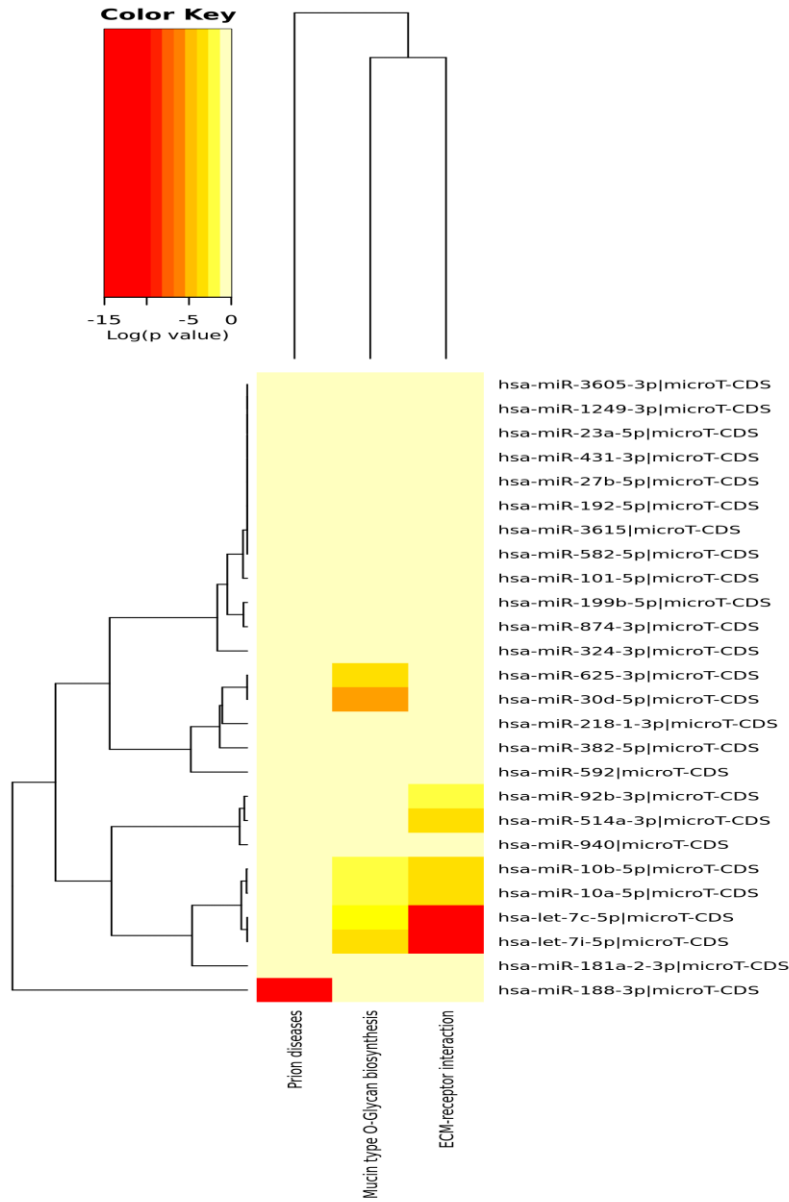

**Supplementary Figure S4.14.** KEGG pathway enrichment analysis of miRNA signatures in THCA

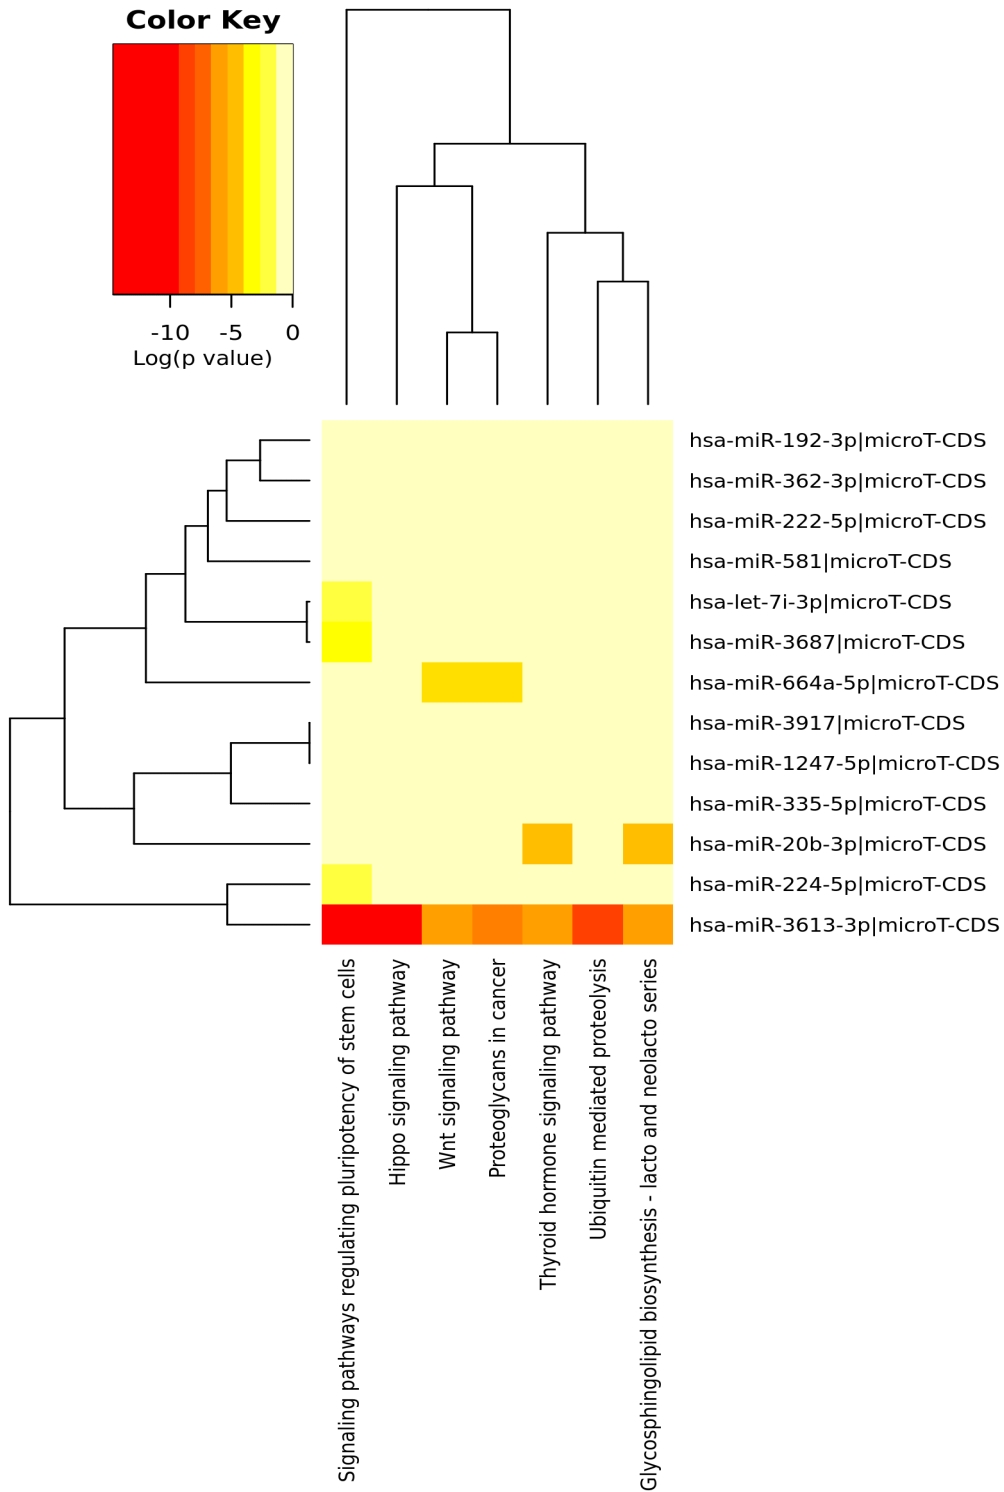

**Supplementary Figure S4.15.** KEGG pathway enrichment analysis of miRNA signatures in UVM

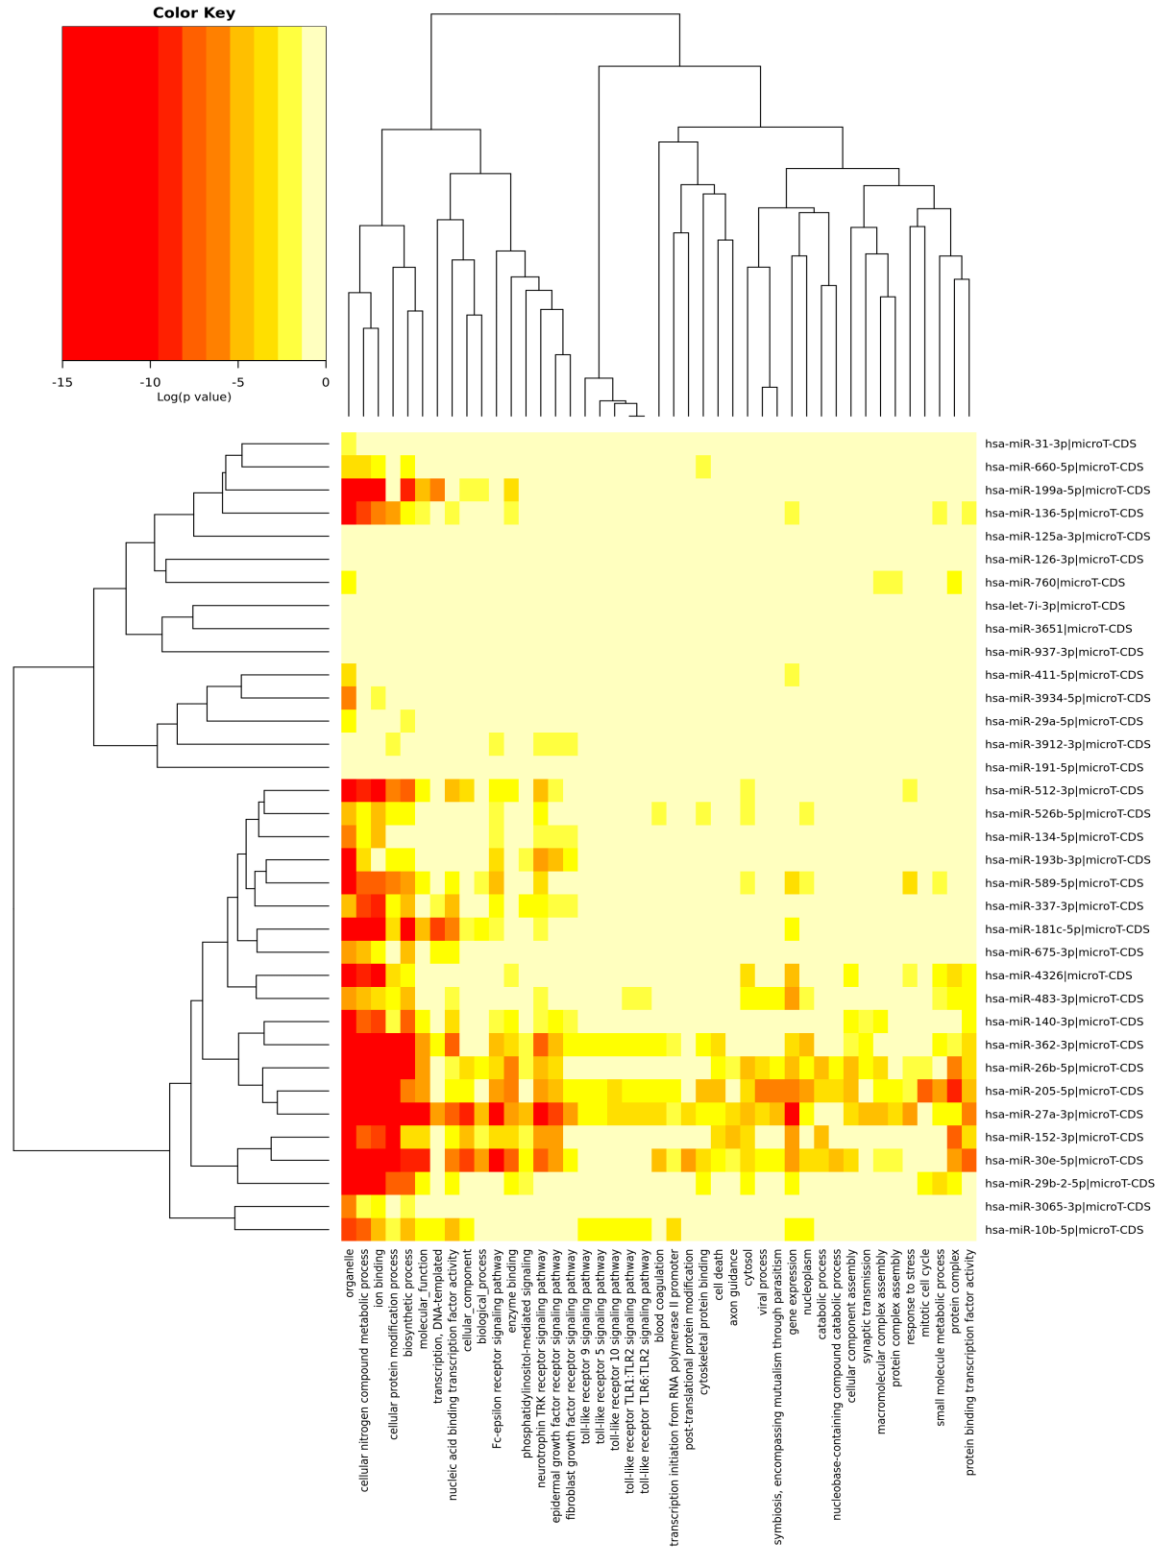

Supplementary Figure S5.1. GO category enrichment analysis of miRNA signatures in BLCA

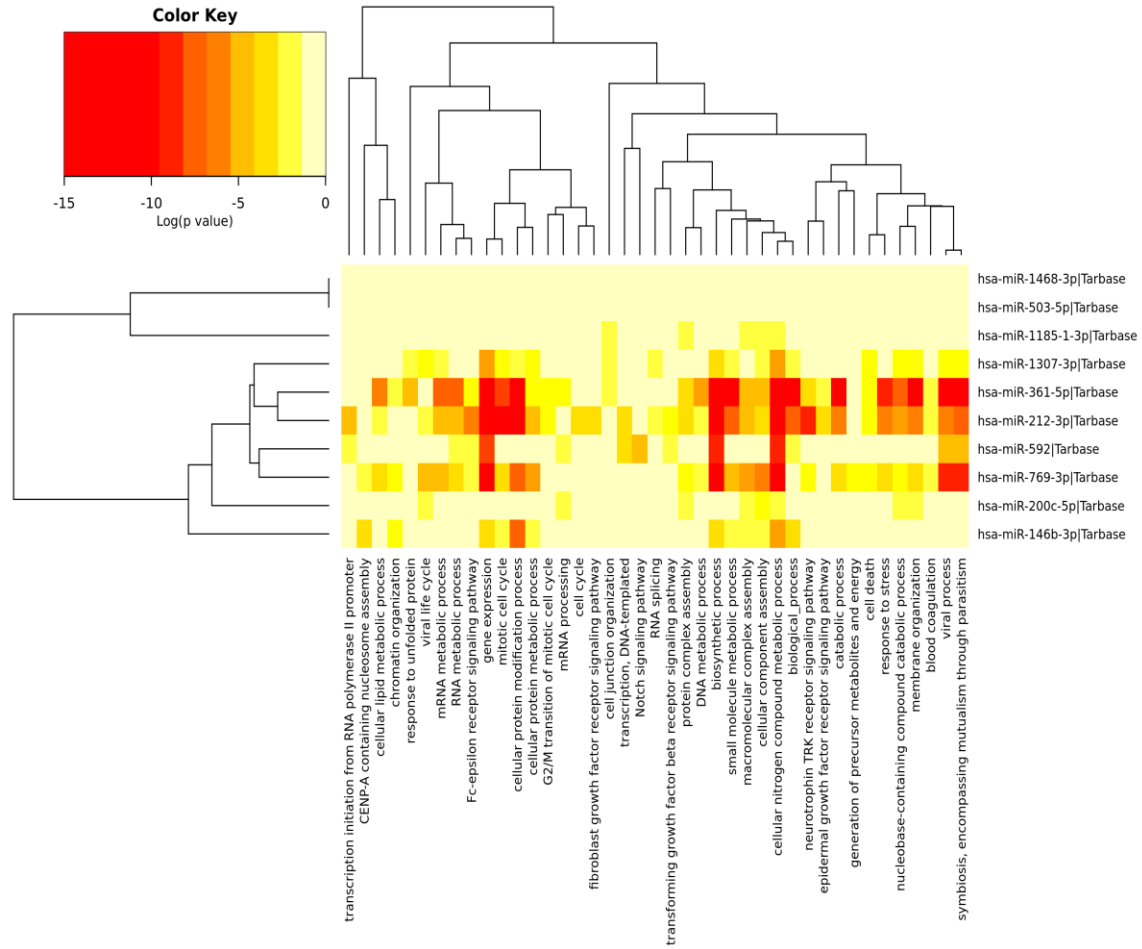

**Supplementary Figure S5.2.** GO category enrichment analysis of miRNA signatures in BRCA

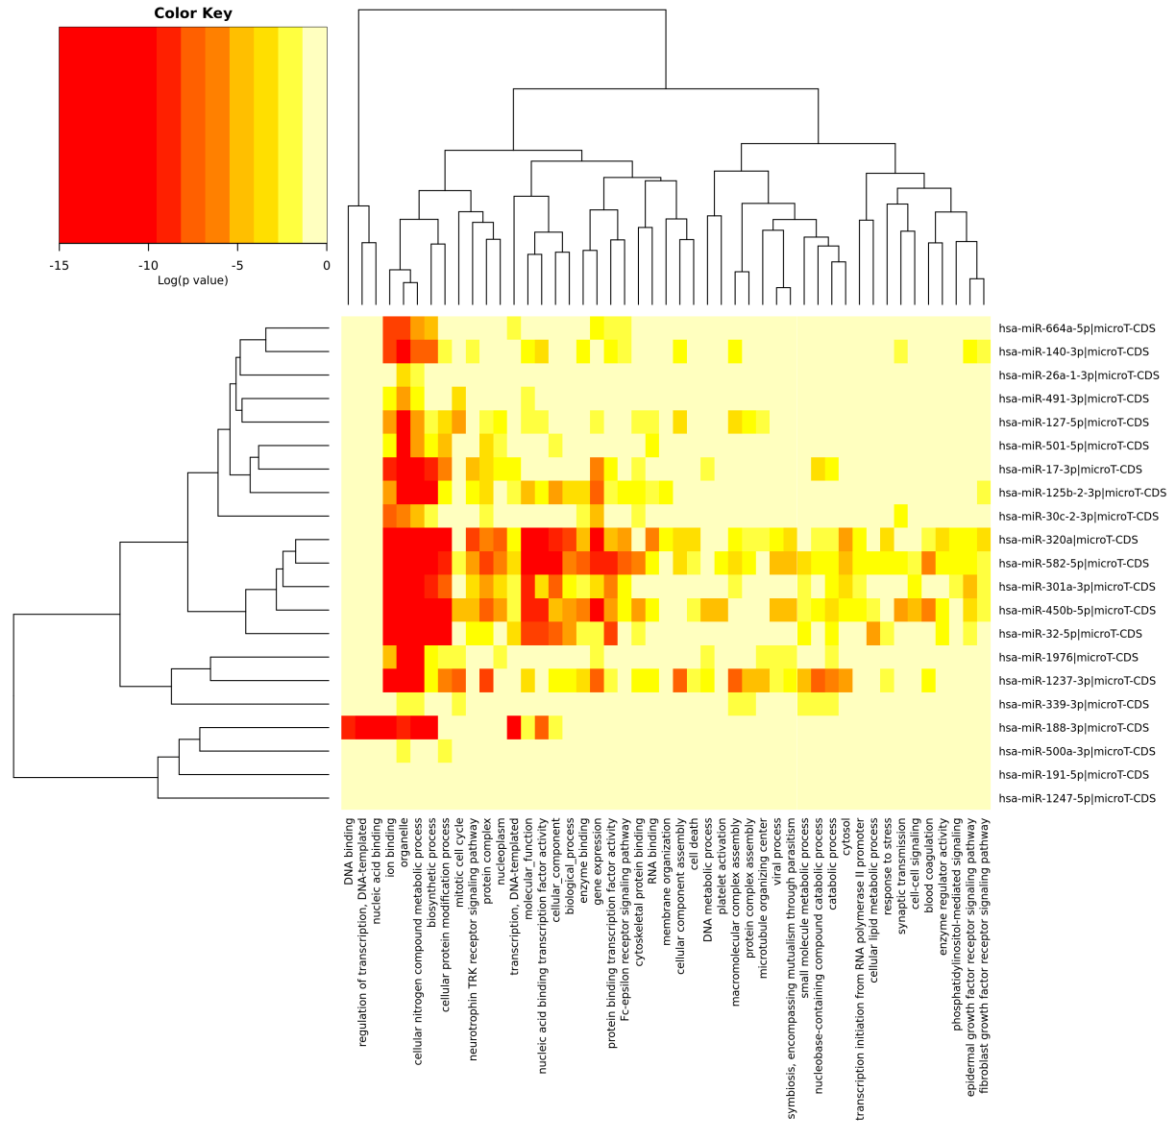

**Supplementary Figure S5.3.** GO category enrichment analysis of miRNA signatures in COAD

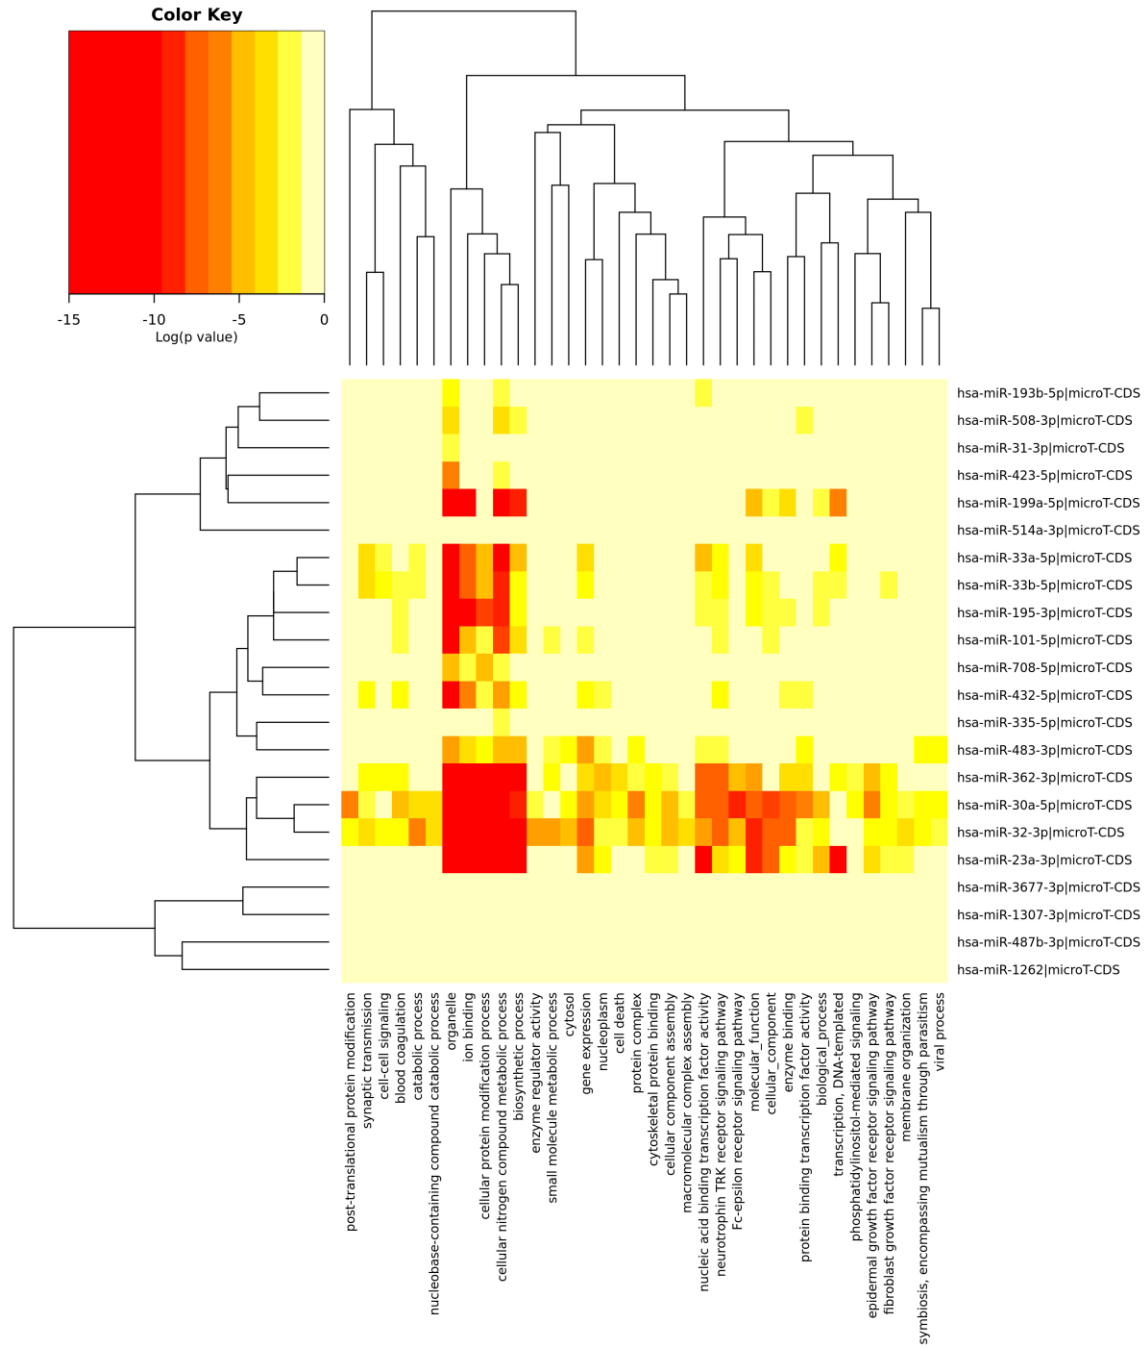

**Supplementary Figure S5.4.** GO category enrichment analysis of miRNA signatures in ESCA

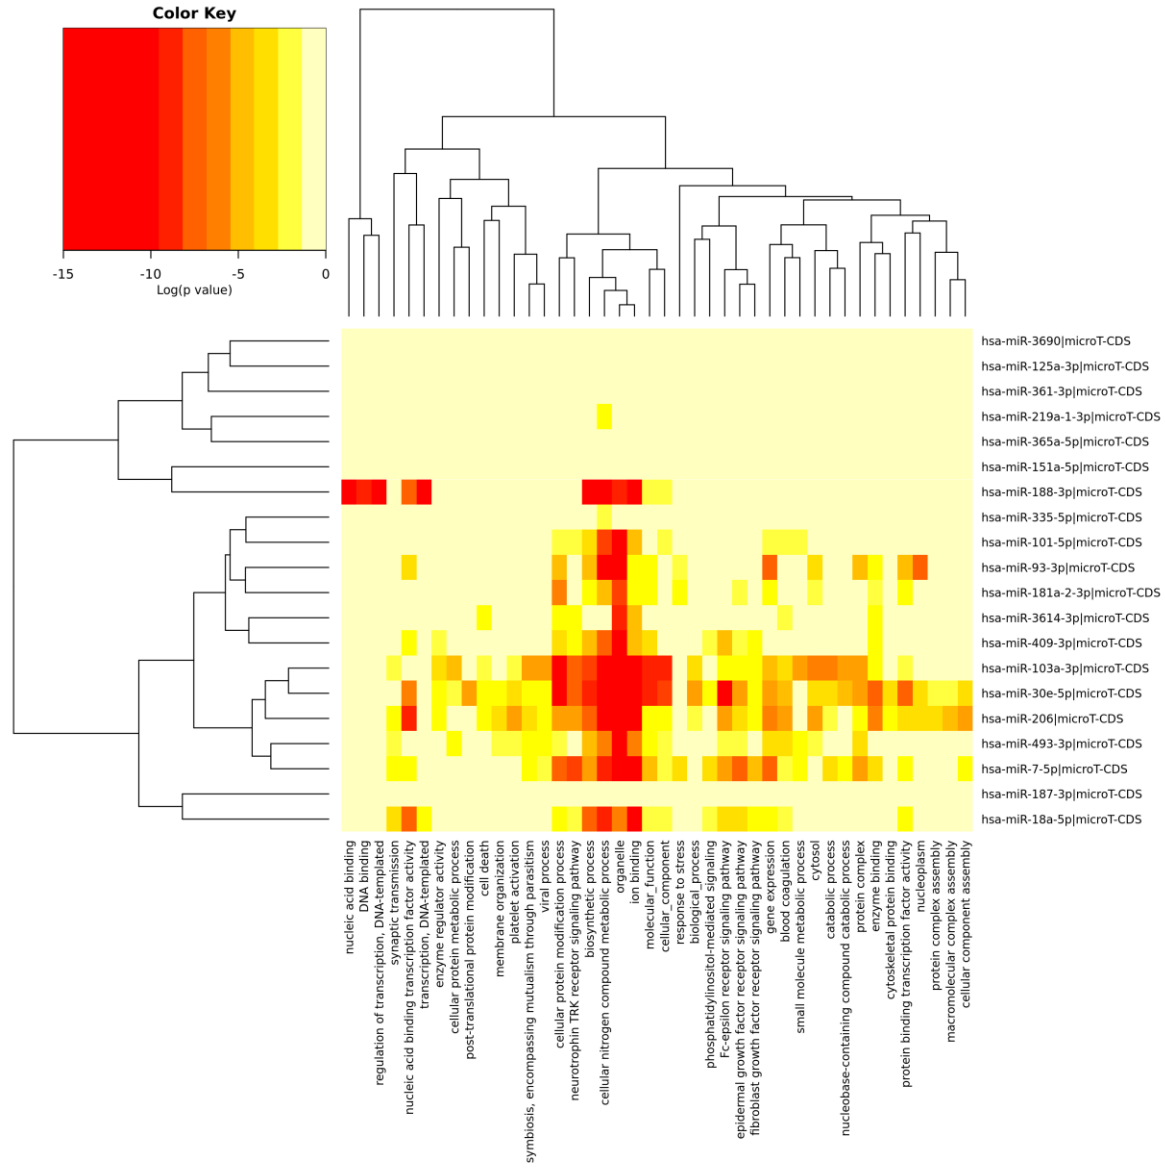

**Supplementary Figure S5.5.** GO category enrichment analysis of miRNA signatures in HNSC



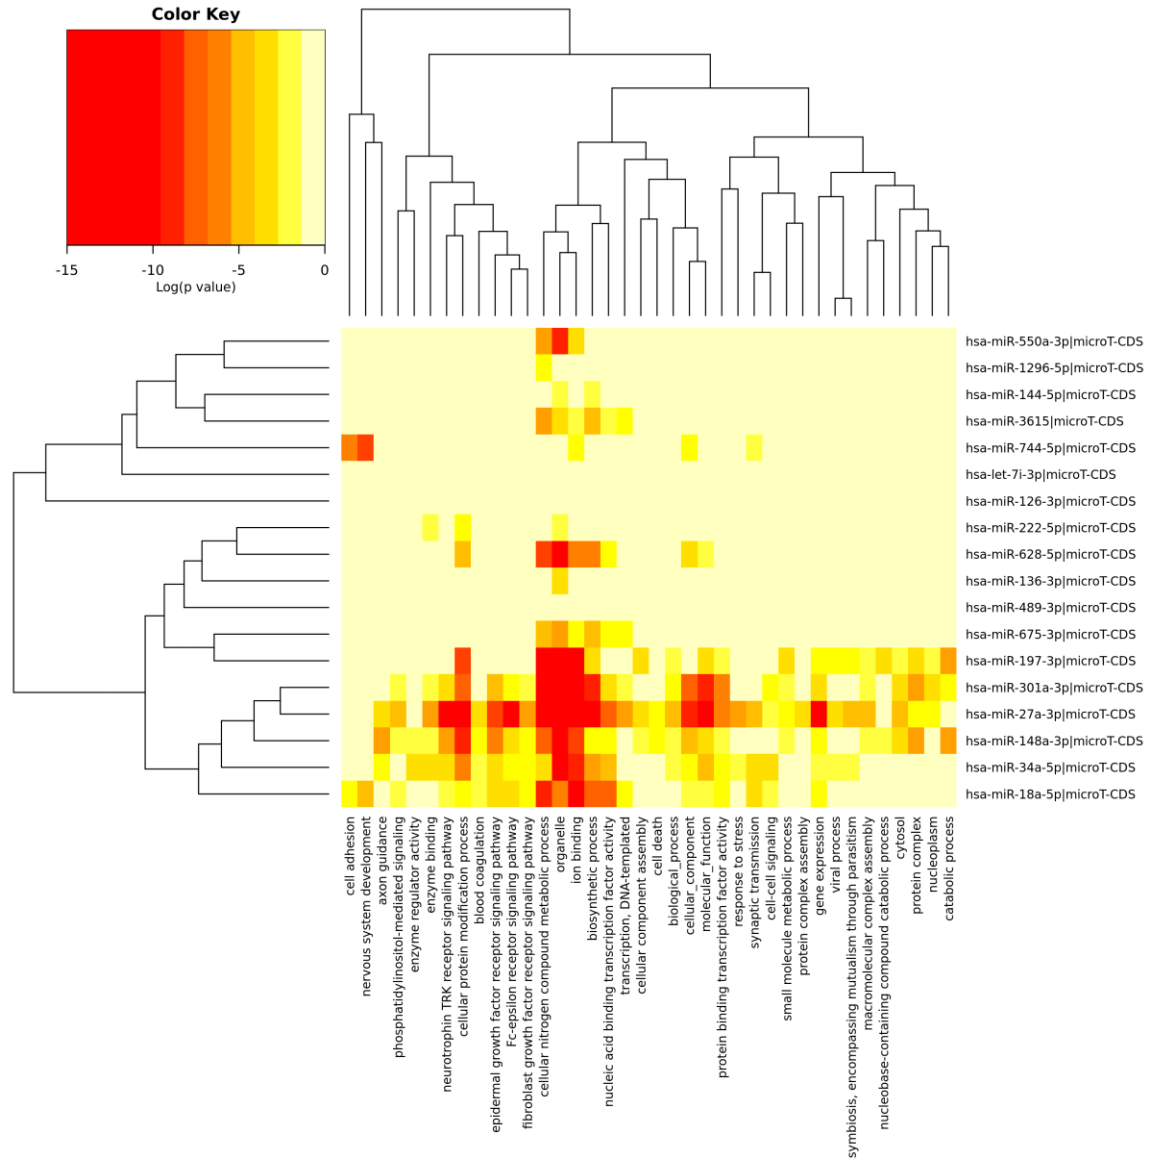

**Supplementary Figure S5.6.** GO category enrichment analysis of miRNA signatures in KIRC

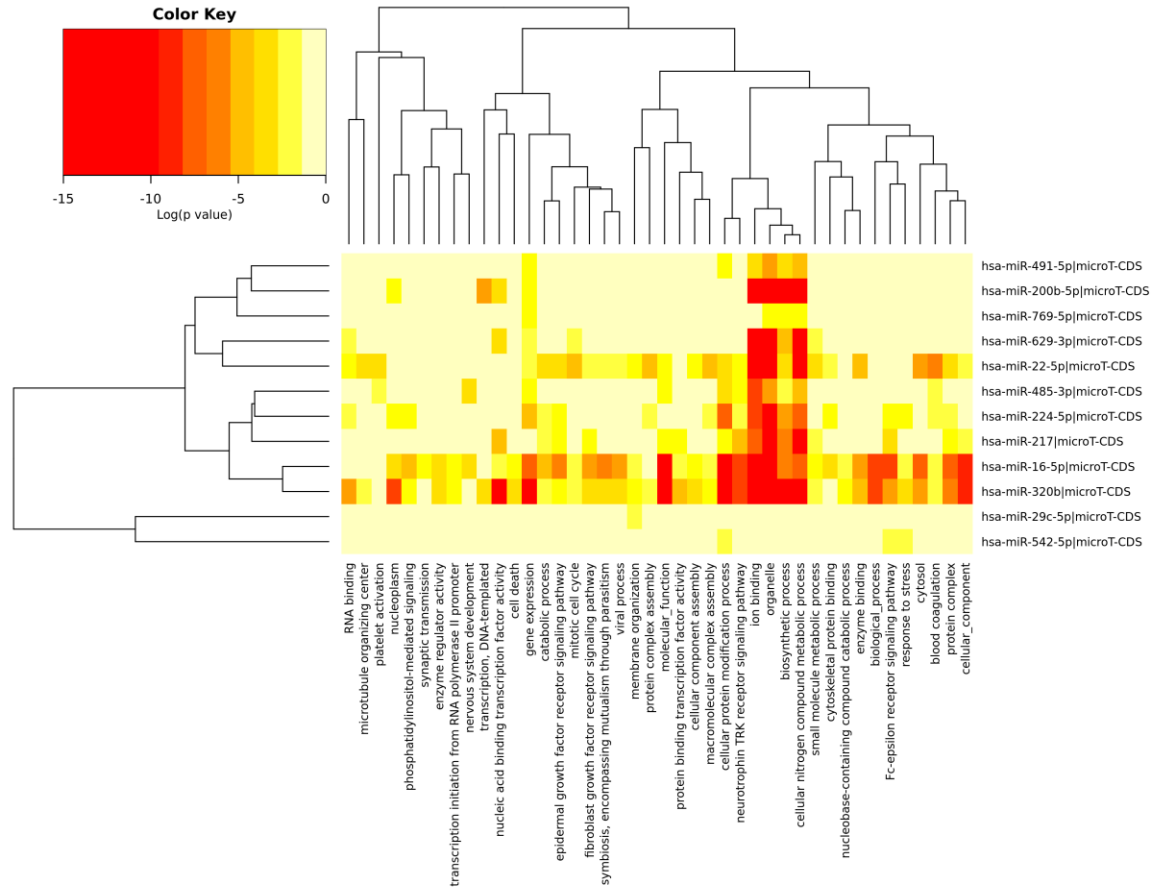

**Supplementary Figure S5.7.** GO category enrichment analysis of miRNA signatures in KIRP



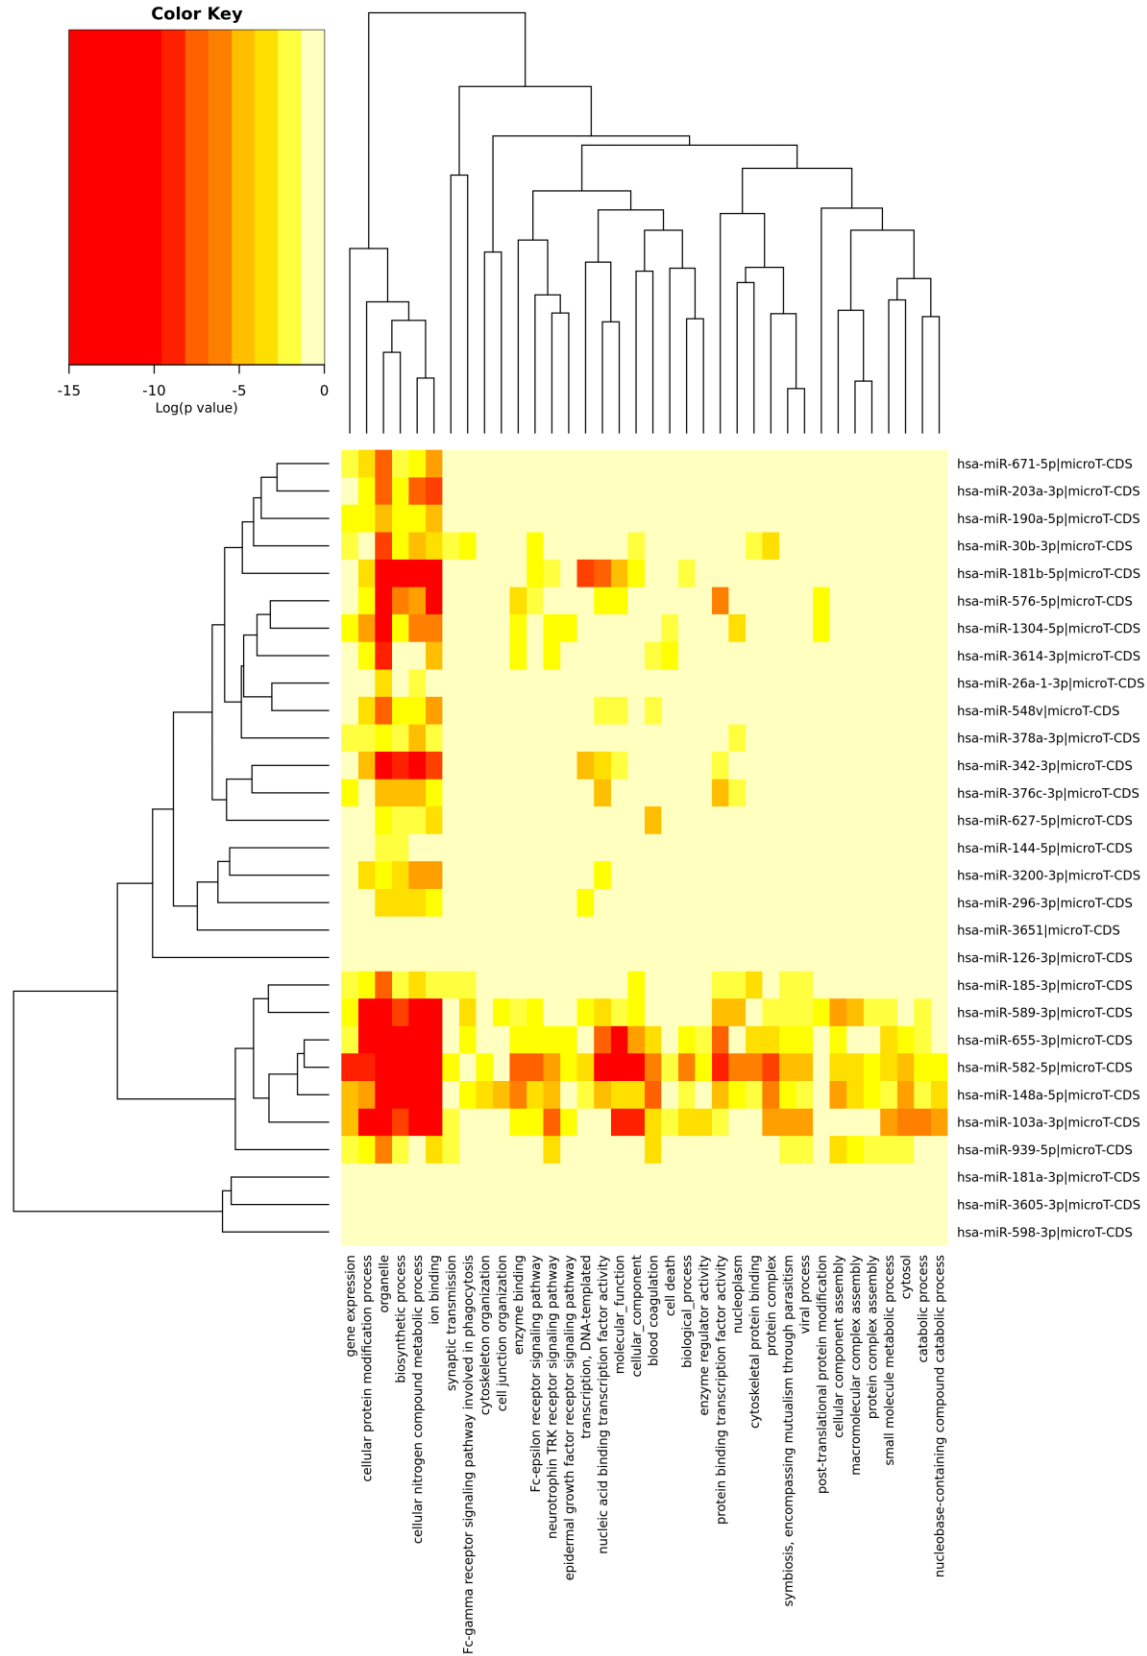

**Supplementary Figure S5.9.** GO category enrichment analysis of miRNA signatures in LUAD

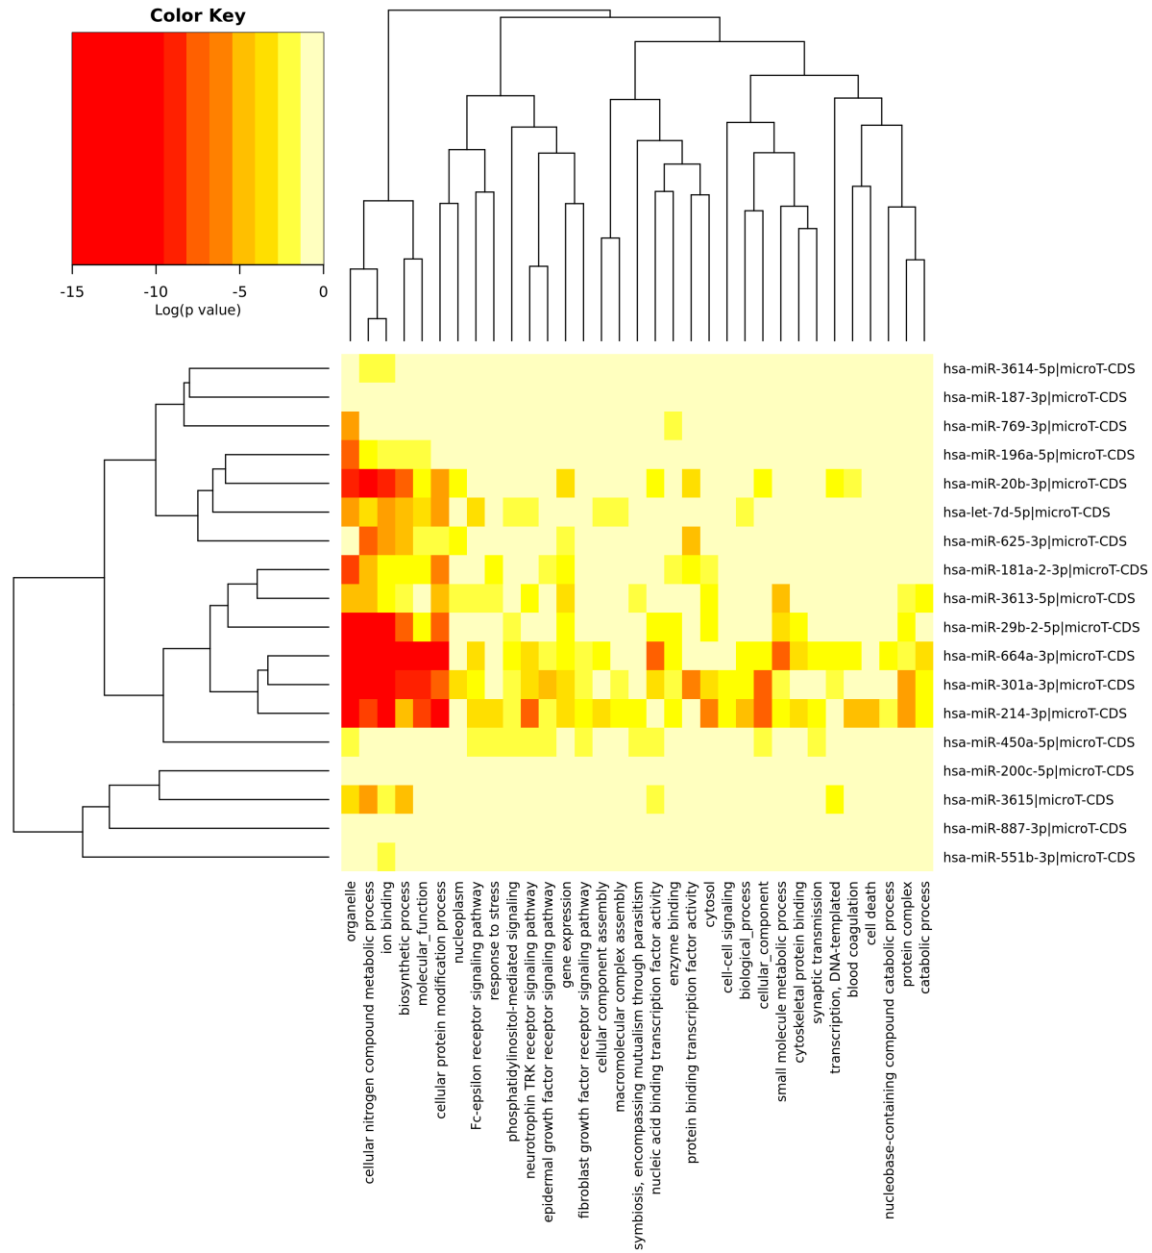

**Supplementary Figure S5.10.** GO category enrichment analysis of miRNA signatures in LUSC



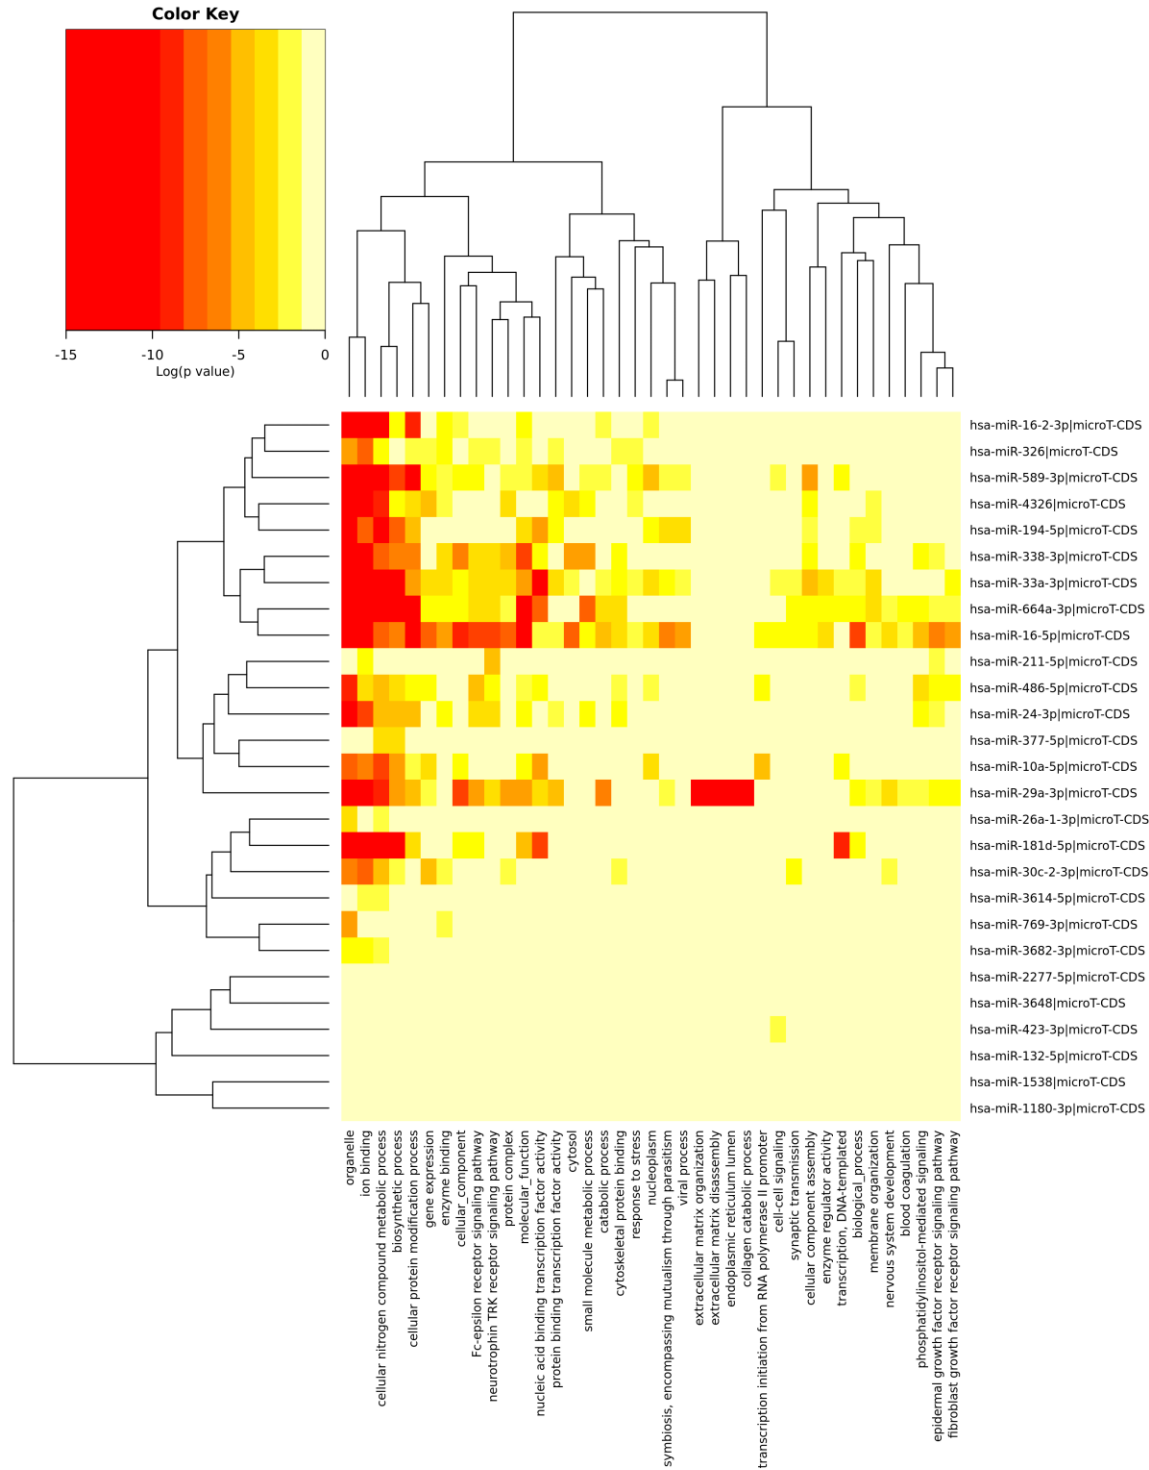

**Supplementary Figure S5.12.** GO category enrichment analysis of miRNA signatures in SKCM

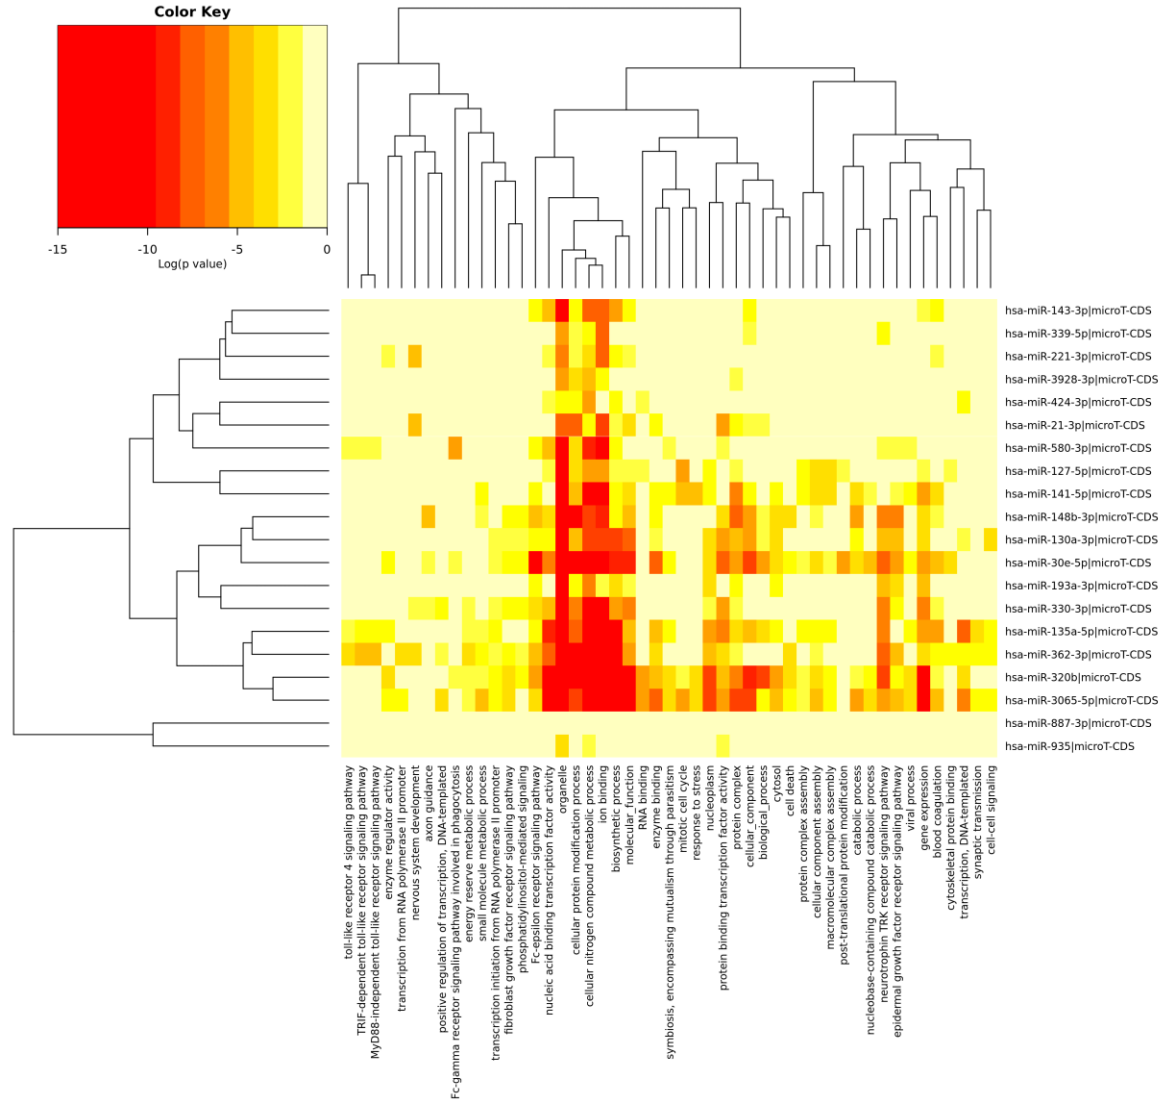

**Supplementary Figure S5.13.** GO category enrichment analysis of miRNA signatures in STAD



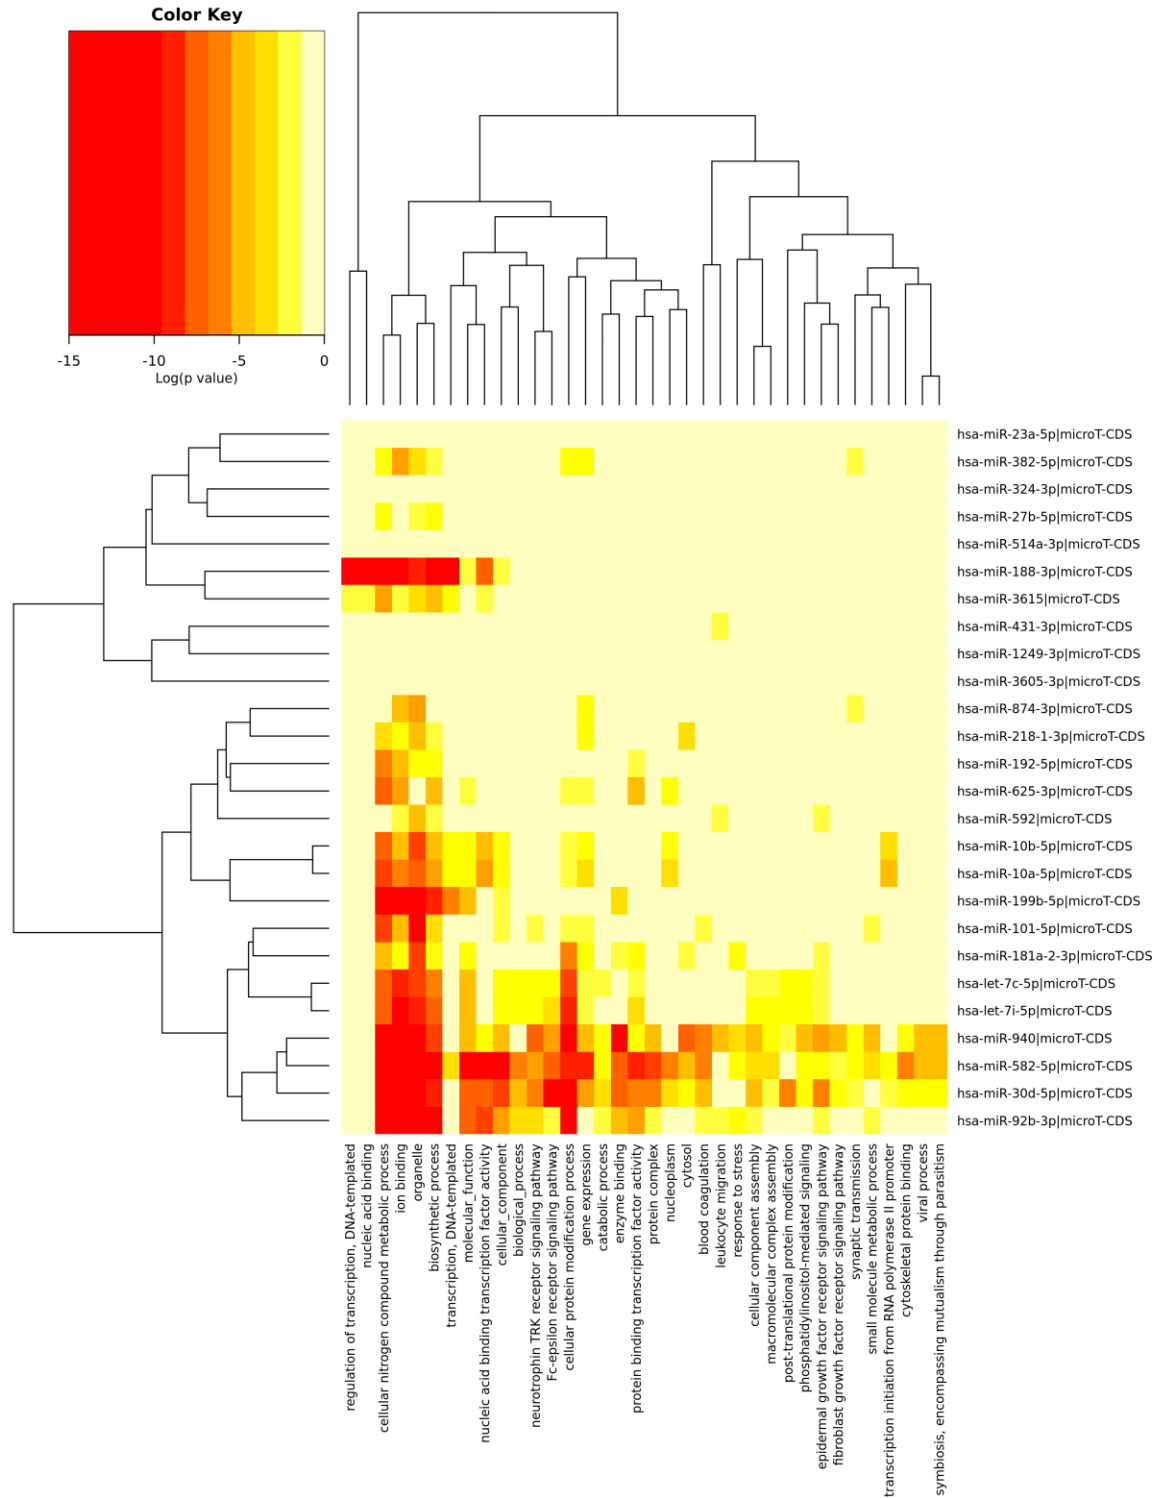

**Supplementary Figure S5.14.** GO category enrichment analysis of miRNA signatures in THCA



## Supplementary Tables

**Supplementary Table S1.** The prediction comparison results of CancerSig with different machine learning methods.

| <b>Method</b>  | <b>miRNA-signature</b> | <b>10-CV Accuracy</b> | <b>Sensitivity</b> | <b>Specificity</b> | <b>MCC</b> | <b>AUC</b> |
|----------------|------------------------|-----------------------|--------------------|--------------------|------------|------------|
| CancerSig-BLCA | 35                     | 84.40±1.27            | 0.64±0.04          | 0.93±0.01          | 0.65±0.02  | 0.82±0.01  |
| LightGBM       | 35                     | 72.22±0.04            | 0.83±0.06          | 0.51±0.14          | 0.35±0.10  | 0.72±0.06  |
| XGBoost        | 35                     | 72.70±0.06            | 0.88±0.06          | 0.41±0.16          | 0.33±0.18  | 0.73±0.05  |
| Random Forest  | 35                     | 70.98±0.05            | 0.77±0.07          | 0.59±0.16          | 0.35±0.13  | 0.74±0.05  |
| CatBoost       | 35                     | 73.93±0.06            | 0.91±0.07          | 0.39±0.12          | 0.37±0.15  | 0.74±0.05  |
| Extra Trees    | 35                     | 72.72±0.04            | 0.78±0.07          | 0.63±0.11          | 0.40±0.09  | 0.74±0.06  |

**Supplementary Table S2.1.** Contribution of individual miRNAs using MED analysis in BLCA

| <b>Rank</b> | <b>miRNA</b>     | <b>MIMAT-ID</b> | <b>MED-Score</b> |
|-------------|------------------|-----------------|------------------|
| 1           | hsa-miR-31-3p    | MIMAT0004504    | 45.21            |
| 2           | hsa-miR-29b-2-5p | MIMAT0004515    | 40.29            |
| 3           | hsa-miR-193b-3p  | MIMAT0002819    | 31.45            |
| 4           | hsa-miR-10b-5p   | MIMAT0000254    | 30.47            |
| 5           | hsa-miR-125a-3p  | MIMAT0004602    | 28.01            |
| 6           | hsa-miR-136-5p   | MIMAT0000448    | 20.15            |
| 7           | hsa-miR-3912-3p  | MIMAT0018186    | 19.16            |
| 8           | hsa-miR-205-5p   | MIMAT0000266    | 17.69            |
| 9           | hsa-miR-337-3p   | MIMAT0000754    | 17.69            |
| 10          | hsa-miR-29a-5p   | MIMAT0004503    | 17.20            |
| 11          | hsa-miR-512-3p   | MIMAT0002823    | 14.74            |
| 12          | hsa-miR-3934-5p  | MIMAT0018349    | 14.25            |
| 13          | hsa-miR-4326     | MIMAT0016888    | 14.25            |
| 14          | hsa-miR-126-3p   | MIMAT0000445    | 12.29            |
| 15          | hsa-miR-26b-5p   | MIMAT0000083    | 12.29            |
| 16          | hsa-miR-362-3p   | MIMAT0004683    | 10.32            |
| 17          | hsa-miR-760      | MIMAT0004957    | 10.32            |
| 18          | hsa-miR-27a-3p   | MIMAT0000084    | 6.39             |
| 19          | hsa-miR-199a-5p  | MIMAT0000231    | 5.90             |
| 20          | hsa-miR-483-3p   | MIMAT0002173    | 4.91             |
| 21          | hsa-miR-181c-5p  | MIMAT0000258    | 3.93             |
| 22          | hsa-let-7i-3p    | MIMAT0004585    | 3.93             |

|    |                 |              |      |
|----|-----------------|--------------|------|
| 23 | hsa-miR-526b-5p | MIMAT0002835 | 3.93 |
| 24 | hsa-miR-660-5p  | MIMAT0003338 | 3.93 |
| 25 | hsa-miR-152-3p  | MIMAT0000438 | 3.44 |
| 26 | hsa-miR-3651    | MIMAT0018071 | 3.44 |
| 27 | hsa-miR-675-3p  | MIMAT0006790 | 2.46 |
| 28 | hsa-miR-140-3p  | MIMAT0004597 | 1.97 |
| 29 | hsa-miR-3065-3p | MIMAT0015378 | 1.47 |
| 30 | hsa-miR-191-5p  | MIMAT0000440 | 1.47 |
| 31 | hsa-miR-134-5p  | MIMAT0000447 | 0.49 |
| 32 | hsa-miR-937-3p  | MIMAT0004980 | 0.49 |
| 33 | hsa-miR-30e-5p  | MIMAT0000692 | 0.49 |
| 34 | hsa-miR-589-5p  | MIMAT0004799 | 0.00 |
| 35 | hsa-miR-411-5p  | MIMAT0003329 | 0.00 |

**Supplementary Table S2.2.** Contribution of individual miRNAs using MED analysis in BRCA

| <b>Rank</b> | <b>miRNA</b>     | <b>MIMAT-ID</b> | <b>MED-Score</b> |
|-------------|------------------|-----------------|------------------|
| 1           | hsa-miR-200c-5p  | MIMAT0004657    | 69.69            |
| 2           | hsa-miR-503      | MIMAT0002874    | 65.03            |
| 3           | hsa-miR-1307-3p  | MIMAT0005951    | 48.45            |
| 4           | hsa-miR-361-3p   | MIMAT0004682    | 47.93            |
| 5           | hsa-miR-212      | MIMAT0022695    | 46.89            |
| 6           | hsa-miR-592      | MIMAT0003260    | 46.89            |
| 7           | hsa-miR-1185-1   | MIMAT0022838    | 43.26            |
| 8           | hsa-miR-146b     | MIMAT0004766    | 43.26            |
| 9           | hsa-miR-1468-5p  | MIMAT0006789    | 34.46            |
| 10          | hsa-miR-769-3p   | MIMAT0003887    | 30.83            |
| 11          | hsa-miR-3941     | MIMAT0018357    | 30.31            |
| 12          | hsa-miR-496      | MIMAT0002818    | 25.65            |
| 13          | hsa-miR-33b-5p   | MIMAT0003301    | 23.58            |
| 14          | hsa-miR-432-3p   | MIMAT0002815    | 20.98            |
| 15          | hsa-miR-153-1    | MIMAT0000439    | 19.43            |
| 16          | hsa-miR-1277     | MIMAT0005933    | 16.32            |
| 17          | hsa-miR-143-3p   | MIMAT0000435    | 12.69            |
| 18          | hsa-miR-3622a    | MIMAT0018004    | 12.69            |
| 19          | hsa-miR-137      | MIMAT0000429    | 11.14            |
| 20          | hsa-miR-3129     | MIMAT0019202    | 11.14            |
| 21          | hsa-miR-331      | MIMAT0000760    | 8.03             |
| 22          | hsa-miR-3651     | MIMAT0018071    | 6.48             |
| 23          | hsa-miR-676      | MIMAT0018203    | 5.44             |
| 24          | hsa-miR-627-5p   | MIMAT0003296    | 4.40             |
| 25          | hsa-miR-10b-5p   | MIMAT0000254    | 3.89             |
| 26          | hsa-miR-30b-3p   | MIMAT0004589    | 2.03             |
| 27          | hsa-miR-218-1-3p | MIMAT0004565    | 2.03             |
| 28          | hsa-miR-379      | MIMAT0000733    | 1.69             |
| 29          | hsa-miR-642a     | MIMAT0003312    | 1.36             |

|    |                 |              |      |
|----|-----------------|--------------|------|
| 30 | hsa-miR-3922    | MIMAT0019227 | 0.88 |
| 31 | hsa-miR-574-3p  | MIMAT0003239 | 0.34 |
| 32 | hsa-miR-324-5p  | MIMAT0000761 | 0.32 |
| 33 | hsa-miR-374c    | MIMAT0018443 | 0.30 |
| 34 | hsa-miR-500a-3p | MIMAT0002871 | 0.29 |

**Supplementary Table S2.3.** Contribution of individual miRNAs using MED analysis in COAD

| <b>Rank</b> | <b>miRNA</b>      | <b>MIMAT-ID</b> | <b>MED-Score</b> |
|-------------|-------------------|-----------------|------------------|
| 1           | hsa-miR-188-3p    | MIMAT0004613    | 73.46            |
| 2           | hsa-miR-1976      | MIMAT0009451    | 70.62            |
| 3           | hsa-miR-320a      | MIMAT0000510    | 63.98            |
| 4           | hsa-miR-450b-5p   | MIMAT0004909    | 51.66            |
| 5           | hsa-miR-140-3p    | MIMAT0004597    | 35.55            |
| 6           | hsa-miR-17-3p     | MIMAT0000071    | 34.60            |
| 7           | hsa-miR-301a-3p   | MIMAT0000688    | 33.65            |
| 8           | hsa-miR-582-5p    | MIMAT0003247    | 28.91            |
| 9           | hsa-miR-491-3p    | MIMAT0004765    | 27.01            |
| 10          | hsa-miR-501-5p    | MIMAT0002872    | 26.07            |
| 11          | hsa-miR-500a-3p   | MIMAT0002871    | 24.17            |
| 12          | hsa-miR-339-3p    | MIMAT0004702    | 21.33            |
| 13          | hsa-miR-127-5p    | MIMAT0004604    | 20.38            |
| 14          | hsa-miR-30c-2-3p  | MIMAT0004550    | 19.43            |
| 15          | hsa-miR-125b-2-3p | MIMAT0004603    | 19.43            |
| 16          | hsa-miR-664a-5p   | MIMAT0005948    | 11.85            |
| 17          | hsa-miR-32-5p     | MIMAT0000090    | 10.90            |
| 18          | hsa-miR-1237-3p   | MIMAT0005592    | 10.90            |
| 19          | hsa-miR-191-5p    | MIMAT0000440    | 5.21             |
| 20          | hsa-miR-26a-1-3p  | MIMAT0004499    | 5.21             |
| 21          | hsa-miR-1247-5p   | MIMAT0005899    | 2.37             |

**Supplementary Table S2.4.** Contribution of individual miRNAs using MED analysis in ESCA

| <b>Rank</b> | <b>miRNA</b>    | <b>MIMAT-ID</b> | <b>MED-Score</b> |
|-------------|-----------------|-----------------|------------------|
| 1           | hsa-miR-708-5p  | MIMAT0004926    | 43.83            |
| 2           | hsa-miR-199a-5p | MIMAT0000231    | 43.83            |
| 3           | hsa-miR-33b-5p  | MIMAT0003301    | 40.12            |
| 4           | hsa-miR-23a-3p  | MIMAT0000078    | 40.12            |
| 5           | hsa-miR-423-5p  | MIMAT0004748    | 30.25            |
| 6           | hsa-miR-193b-5p | MIMAT0004767    | 29.01            |
| 7           | hsa-miR-3677-3p | MIMAT0018101    | 29.01            |
| 8           | hsa-miR-362-3p  | MIMAT0004683    | 21.60            |

|    |                 |              |       |
|----|-----------------|--------------|-------|
| 9  | hsa-miR-487b-3p | MIMAT0003180 | 17.90 |
| 10 | hsa-miR-508-3p  | MIMAT0002880 | 16.67 |
| 11 | hsa-miR-31-3p   | MIMAT0004504 | 15.43 |
| 12 | hsa-miR-33a-5p  | MIMAT0000091 | 8.02  |
| 13 | hsa-miR-30a-5p  | MIMAT0000087 | 6.79  |
| 14 | hsa-miR-335-5p  | MIMAT0000765 | 6.79  |
| 15 | hsa-miR-514a-3p | MIMAT0002883 | 6.79  |
| 16 | hsa-miR-432-5p  | MIMAT0002814 | 5.56  |
| 17 | hsa-miR-1307-3p | MIMAT0005951 | 5.56  |
| 18 | hsa-miR-1262    | MIMAT0005914 | 4.32  |
| 19 | hsa-miR-101-5p  | MIMAT0004513 | 3.09  |
| 20 | hsa-miR-32-3p   | MIMAT0004505 | 3.09  |
| 21 | hsa-miR-195-3p  | MIMAT0004615 | 0.62  |
| 22 | hsa-miR-483-3p  | MIMAT0002173 | 0.62  |

**Supplementary Table S2.5.** Contribution of individual miRNAs using MED analysis in HNSC

| <b>Rank</b> | <b>miRNA</b>      | <b>MIMAT-ID</b> | <b>MED-Score</b> |
|-------------|-------------------|-----------------|------------------|
| 1           | hsa-miR-93-3p     | MIMAT0004509    | 27.14            |
| 2           | hsa-miR-335-5p    | MIMAT0000765    | 18.57            |
| 3           | hsa-miR-219a-1-3p | MIMAT0004567    | 18.10            |
| 4           | hsa-miR-361-3p    | MIMAT0004682    | 16.19            |
| 5           | hsa-miR-493-3p    | MIMAT0003161    | 15.71            |
| 6           | hsa-miR-188-3p    | MIMAT0004613    | 14.76            |
| 7           | hsa-miR-3690      | MIMAT0018119    | 12.38            |
| 8           | hsa-miR-103a-3p   | MIMAT0000101    | 11.43            |
| 9           | hsa-miR-101-5p    | MIMAT0004513    | 10.00            |
| 10          | hsa-miR-206       | MIMAT0000462    | 9.52             |
| 11          | hsa-miR-151a-5p   | MIMAT0004697    | 9.52             |
| 12          | hsa-miR-187-3p    | MIMAT0000262    | 5.24             |
| 13          | hsa-miR-7-5p      | MIMAT0000252    | 4.29             |
| 14          | hsa-miR-18a-5p    | MIMAT0000072    | 3.81             |
| 15          | hsa-miR-181a-2-3p | MIMAT0004558    | 3.81             |
| 16          | hsa-miR-365a-5p   | MIMAT0009199    | 3.81             |
| 17          | hsa-miR-125a-3p   | MIMAT0004602    | 3.33             |
| 18          | hsa-miR-30e-5p    | MIMAT0000692    | 1.43             |
| 19          | hsa-miR-3614-3p   | MIMAT0017993    | 1.43             |
| 20          | hsa-miR-409-3p    | MIMAT0001639    | 0.48             |

**Supplementary Table S2.6.** Contribution of individual miRNAs using MED analysis in KIRC

| <b>Rank</b> | <b>miRNA</b>    | <b>MIMAT-ID</b> | <b>MED-Score</b> |
|-------------|-----------------|-----------------|------------------|
| 1           | hsa-miR-144-5p  | MIMAT0004600    | 89.06            |
| 2           | hsa-miR-744-5p  | MIMAT0004945    | 40.63            |
| 3           | hsa-miR-550a-3p | MIMAT0003257    | 38.28            |

|    |                 |              |       |
|----|-----------------|--------------|-------|
| 4  | hsa-miR-1296-5p | MIMAT0005794 | 35.16 |
| 5  | hsa-let-7i-3p   | MIMAT0004585 | 28.91 |
| 6  | hsa-miR-18a-5p  | MIMAT0000072 | 26.56 |
| 7  | hsa-miR-628-5p  | MIMAT0004809 | 19.53 |
| 8  | hsa-miR-197-3p  | MIMAT0000227 | 17.97 |
| 9  | hsa-miR-222-5p  | MIMAT0004569 | 17.19 |
| 10 | hsa-miR-126-3p  | MIMAT0000445 | 14.06 |
| 11 | hsa-miR-489-3p  | MIMAT0002805 | 14.06 |
| 12 | hsa-miR-27a-3p  | MIMAT0000084 | 12.50 |
| 13 | hsa-miR-3615    | MIMAT0017994 | 11.72 |
| 14 | hsa-miR-301a-3p | MIMAT0000688 | 5.47  |
| 15 | hsa-miR-148a-3p | MIMAT0000243 | 4.69  |
| 16 | hsa-miR-136-3p  | MIMAT0004606 | 4.69  |
| 17 | hsa-miR-675-3p  | MIMAT0006790 | 1.56  |
| 18 | hsa-miR-34a-5p  | MIMAT0000255 | 0.78  |

**Supplementary Table S2.7.** Contribution of individual miRNAs using MED analysis in KIRP

| <b>Rank</b> | <b>miRNA</b>    | <b>MIMAT-ID</b> | <b>MED-Score</b> |
|-------------|-----------------|-----------------|------------------|
| 1           | hsa-miR-491-5p  | MIMAT0002807    | 18.39            |
| 2           | hsa-miR-769-5p  | MIMAT0003886    | 16.09            |
| 3           | hsa-miR-29c-5p  | MIMAT0004673    | 11.49            |
| 4           | hsa-miR-16-5p   | MIMAT0000069    | 9.20             |
| 5           | hsa-miR-200b-5p | MIMAT0004571    | 7.66             |
| 6           | hsa-miR-485-3p  | MIMAT0002176    | 7.66             |
| 7           | hsa-miR-22-5p   | MIMAT0004495    | 6.90             |
| 8           | hsa-miR-629-3p  | MIMAT0003298    | 5.36             |
| 9           | hsa-miR-320b    | MIMAT0005792    | 5.36             |
| 10          | hsa-miR-217     | MIMAT0000274    | 2.30             |
| 11          | hsa-miR-224-5p  | MIMAT0000281    | 1.53             |
| 12          | hsa-miR-542-5p  | MIMAT0003340    | 1.53             |

**Supplementary Table S2.8.** Contribution of individual miRNAs using MED analysis in LIHCC

| <b>Rank</b> | <b>miRNA</b>   | <b>MIMAT-ID</b> | <b>MED-Score</b> |
|-------------|----------------|-----------------|------------------|
| 1           | hsa-miR-550a-2 | MIMAT0004800    | 60.91269         |
| 2           | hsa-miR-549    | MIMAT0003333    | 54.72223         |
| 3           | hsa-miR-518b   | MIMAT0002844    | 51.15079         |
| 4           | hsa-miR-512-2  | MIMAT0002822    | 50.67461         |
| 5           | hsa-miR-1179   | MIMAT0005824    | 27.73809         |
| 6           | hsa-miR-574-3p | MIMAT0003239    | 27.02382         |
| 7           | hsa-miR-424-3p | MIMAT0004749    | 26.62697         |
| 8           | hsa-miR-4286   | MIMAT0016916    | 24.7222          |
| 9           | hsa-let-7i-3p  | MIMAT0004585    | 24.16667         |
| 10          | hsa-miR-320a   | MIMAT0037311    | 22.97617         |
| 11          | hsa-miR-17-3p  | MIMAT0000071    | 22.81745         |

|    |                 |              |          |
|----|-----------------|--------------|----------|
| 12 | hsa-miR-299     | MIMAT0000687 | 22.02382 |
| 13 | hsa-miR-3651    | MIMAT0018071 | 17.02382 |
| 14 | hsa-miR-2277-5p | MIMAT0017352 | 13.76985 |
| 15 | hsa-miR-621     | MIMAT0003290 | 13.61111 |
| 16 | hsa-miR-181c-5p | MIMAT0000258 | 13.05555 |
| 17 | hsa-miR-539     | MIMAT0003163 | 12.9762  |
| 18 | hsa-miR-106b    | MIMAT0000680 | 10.83334 |
| 19 | hsa-miR-1269    | MIMAT0005923 | 8.531742 |
| 20 | hsa-miR-139     | MIMAT0000250 | 6.706364 |
| 21 | hsa-miR-152-3p  | MIMAT0000438 | 6.626987 |
| 22 | hsa-miR-2355    | MIMAT0016895 | 3.76984  |
| 23 | hsa-miR-150     | MIMAT0000451 | 2.103168 |

**Supplementary Table S2.9.** Contribution of individual miRNAs using MED analysis in LUAD

| <b>Rank</b> | <b>miRNA</b>     | <b>MIMAT-ID</b> | <b>MED-Score</b> |
|-------------|------------------|-----------------|------------------|
| 1           | hsa-miR-671-5p   | MIMAT0003880    | 29.65            |
| 2           | hsa-miR-3651     | MIMAT0018071    | 27.88            |
| 3           | hsa-miR-1304-5p  | MIMAT0005892    | 24.78            |
| 4           | hsa-miR-342-3p   | MIMAT0000753    | 24.34            |
| 5           | hsa-miR-548v     | MIMAT0015020    | 22.12            |
| 6           | hsa-miR-296-3p   | MIMAT0004679    | 22.12            |
| 7           | hsa-miR-598-3p   | MIMAT0003266    | 21.68            |
| 8           | hsa-miR-190a-5p  | MIMAT0000458    | 21.24            |
| 9           | hsa-miR-144-5p   | MIMAT0004600    | 16.37            |
| 10          | hsa-miR-185-3p   | MIMAT0004611    | 15.93            |
| 11          | hsa-miR-181b-5p  | MIMAT0000257    | 15.49            |
| 12          | hsa-miR-3614-3p  | MIMAT0017993    | 15.04            |
| 13          | hsa-miR-126-3p   | MIMAT0000445    | 14.16            |
| 14          | hsa-miR-589-3p   | MIMAT0003256    | 14.16            |
| 15          | hsa-miR-26a-1-3p | MIMAT0004499    | 13.72            |
| 16          | hsa-miR-148a-5p  | MIMAT0004549    | 13.27            |
| 17          | hsa-miR-3605-3p  | MIMAT0017982    | 12.83            |
| 18          | hsa-miR-627-5p   | MIMAT0003296    | 12.83            |
| 19          | hsa-miR-376c-3p  | MIMAT0000720    | 12.39            |
| 20          | hsa-miR-30b-3p   | MIMAT0004589    | 11.50            |
| 21          | hsa-miR-3200-3p  | MIMAT0015085    | 10.18            |
| 22          | hsa-miR-378a-3p  | MIMAT0000732    | 9.29             |
| 23          | hsa-miR-103a-3p  | MIMAT0000101    | 7.96             |
| 24          | hsa-miR-203a-3p  | MIMAT0000264    | 7.96             |
| 25          | hsa-miR-576-5p   | MIMAT0003241    | 7.08             |
| 26          | hsa-miR-939-5p   | MIMAT0004982    | 2.21             |
| 27          | hsa-miR-655-3p   | MIMAT0003331    | 2.21             |
| 28          | hsa-miR-582-5p   | MIMAT0003247    | 1.77             |
| 29          | hsa-miR-181a-3p  | MIMAT0000270    | 0.44             |



**Supplementary Table S2.10.** Contribution of individual miRNAs using MED analysis in LUSC

| <b>Rank</b> | <b>miRNA</b>      | <b>MIMAT-ID</b> | <b>MED-Score</b> |
|-------------|-------------------|-----------------|------------------|
| 1           | hsa-miR-181a-2-3p | MIMAT0004558    | 28.02            |
| 2           | hsa-miR-664a-3p   | MIMAT0005949    | 20.35            |
| 3           | hsa-miR-769-3p    | MIMAT0003887    | 19.17            |
| 4           | hsa-miR-29b-2-5p  | MIMAT0004515    | 17.40            |
| 5           | hsa-miR-3614-5p   | MIMAT0017992    | 16.22            |
| 6           | hsa-miR-214-3p    | MIMAT0000271    | 13.86            |
| 7           | hsa-miR-200c-5p   | MIMAT0004657    | 12.68            |
| 8           | hsa-miR-3613-5p   | MIMAT0017990    | 12.09            |
| 9           | hsa-miR-196a-5p   | MIMAT0000226    | 10.32            |
| 10          | hsa-miR-551b-3p   | MIMAT0003233    | 9.73             |
| 11          | hsa-miR-301a-3p   | MIMAT0000688    | 9.14             |
| 12          | hsa-miR-450a-5p   | MIMAT0001545    | 9.14             |
| 13          | hsa-let-7d-5p     | MIMAT0000065    | 7.96             |
| 14          | hsa-miR-187-3p    | MIMAT0000262    | 7.96             |
| 15          | hsa-miR-20b-3p    | MIMAT0004752    | 7.96             |
| 16          | hsa-miR-887-3p    | MIMAT0004951    | 6.19             |
| 17          | hsa-miR-625-3p    | MIMAT0004808    | 0.88             |
| 18          | hsa-miR-3615      | MIMAT0017994    | 0.29             |

**Supplementary Table S2.11.** Contribution of individual miRNAs using MED analysis in READ

| <b>Rank</b> | <b>miRNA</b>    | <b>MIMAT-ID</b> | <b>MED-Score</b> |
|-------------|-----------------|-----------------|------------------|
| 1           | hsa-miR-10a-5p  | MIMAT0000253    | 30.30            |
| 2           | hsa-miR-9-5p    | MIMAT0000441    | 30.30            |
| 3           | hsa-miR-135b-3p | MIMAT0004698    | 27.27            |
| 4           | hsa-miR-491-5p  | MIMAT0002807    | 24.24            |
| 5           | hsa-miR-31-3p   | MIMAT0004504    | 18.18            |
| 6           | hsa-miR-656-3p  | MIMAT0003332    | 18.18            |
| 7           | hsa-miR-140-5p  | MIMAT0000431    | 15.15            |
| 8           | hsa-miR-1269a   | MIMAT0005923    | 15.15            |
| 9           | hsa-miR-1468-5p | MIMAT0006789    | 9.09             |
| 10          | hsa-miR-935     | MIMAT0004978    | 9.09             |
| 11          | hsa-miR-200b-3p | MIMAT0000318    | 3.03             |

**Supplementary Table S2.12.** Contribution of individual miRNAs using MED analysis in SKCM

| <b>Rank</b> | <b>miRNA</b>   | <b>MIMAT-ID</b> | <b>MED-Score</b> |
|-------------|----------------|-----------------|------------------|
| 1           | hsa-miR-211-5p | MIMAT0000268    | 39.07            |
| 2           | hsa-miR-194-5p | MIMAT0000460    | 31.36            |

|    |                  |              |       |
|----|------------------|--------------|-------|
| 3  | hsa-miR-3614-5p  | MIMAT0017992 | 30.33 |
| 4  | hsa-miR-326      | MIMAT0000756 | 29.31 |
| 5  | hsa-miR-4326     | MIMAT0016888 | 28.79 |
| 6  | hsa-miR-1180-3p  | MIMAT0005825 | 28.79 |
| 7  | hsa-miR-664a-3p  | MIMAT0005949 | 27.25 |
| 8  | hsa-miR-26a-1-3p | MIMAT0004499 | 21.59 |
| 9  | hsa-miR-132-5p   | MIMAT0004594 | 19.02 |
| 10 | hsa-miR-1538     | MIMAT0007400 | 16.97 |
| 11 | hsa-miR-10a-5p   | MIMAT0000253 | 15.42 |
| 12 | hsa-miR-423-3p   | MIMAT0001340 | 13.37 |
| 13 | hsa-miR-338-3p   | MIMAT0000763 | 11.83 |
| 14 | hsa-miR-30c-2-3p | MIMAT0004550 | 11.31 |
| 15 | hsa-miR-769-3p   | MIMAT0003887 | 11.31 |
| 16 | hsa-miR-2277-5p  | MIMAT0017352 | 9.25  |
| 17 | hsa-miR-16-5p    | MIMAT0000069 | 5.66  |
| 18 | hsa-miR-181d-5p  | MIMAT0002821 | 5.14  |
| 19 | hsa-miR-3648     | MIMAT0018068 | 4.63  |
| 20 | hsa-miR-589-3p   | MIMAT0003256 | 3.60  |
| 21 | hsa-miR-16-2-3p  | MIMAT0004518 | 2.57  |
| 22 | hsa-miR-29a-3p   | MIMAT0000086 | 2.06  |
| 23 | hsa-miR-24-3p    | MIMAT0000080 | 2.06  |
| 24 | hsa-miR-486-5p   | MIMAT0002177 | 2.06  |
| 25 | hsa-miR-3682-3p  | MIMAT0018110 | 1.54  |
| 26 | hsa-miR-33a-3p   | MIMAT0004506 | 1.03  |
| 27 | hsa-miR-377-5p   | MIMAT0004689 | 0.51  |

**Supplementary Table S2.13.** Contribution of individual miRNAs using MED analysis in STAD

| <b>Rank</b> | <b>miRNA</b>    | <b>MIMAT-ID</b> | <b>MED-Score</b> |
|-------------|-----------------|-----------------|------------------|
| 1           | hsa-miR-130a-3p | MIMAT0000425    | 34.38            |
| 2           | hsa-miR-320b    | MIMAT0005792    | 30.18            |
| 3           | hsa-miR-141-5p  | MIMAT0004598    | 29.13            |
| 4           | hsa-miR-3065-5p | MIMAT0015066    | 25.46            |
| 5           | hsa-miR-887-3p  | MIMAT0004951    | 24.41            |
| 6           | hsa-miR-362-3p  | MIMAT0004683    | 20.73            |
| 7           | hsa-miR-135a-5p | MIMAT0000428    | 19.69            |
| 8           | hsa-miR-21-3p   | MIMAT0004494    | 16.01            |
| 9           | hsa-miR-148b-3p | MIMAT0000759    | 14.96            |
| 10          | hsa-miR-580-3p  | MIMAT0003245    | 12.86            |
| 11          | hsa-miR-330-3p  | MIMAT0000751    | 8.66             |
| 12          | hsa-miR-143-3p  | MIMAT0000435    | 6.56             |
| 13          | hsa-miR-339-5p  | MIMAT0000764    | 6.56             |
| 14          | hsa-miR-30e-5p  | MIMAT0000692    | 5.51             |
| 15          | hsa-miR-3928-3p | MIMAT0018205    | 4.99             |
| 16          | hsa-miR-935     | MIMAT0004978    | 4.46             |
| 17          | hsa-miR-127-5p  | MIMAT0004604    | 3.94             |

|    |                 |              |      |
|----|-----------------|--------------|------|
| 18 | hsa-miR-424-3p  | MIMAT0004749 | 2.89 |
| 19 | hsa-miR-221-3p  | MIMAT0000278 | 1.84 |
| 20 | hsa-miR-193a-3p | MIMAT0000459 | 0.26 |

**Supplementary Table S2.14.** Contribution of individual miRNAs using MED analysis in THCA

| <b>Rank</b> | <b>miRNA</b>      | <b>MIMAT-ID</b> | <b>MED-Score</b> |
|-------------|-------------------|-----------------|------------------|
| 1           | hsa-miR-940       | MIMAT0004983    | 34.80            |
| 2           | hsa-let-7i-5p     | MIMAT0000415    | 25.60            |
| 3           | hsa-miR-1249-3p   | MIMAT0005901    | 23.60            |
| 4           | hsa-miR-101-5p    | MIMAT0004513    | 23.20            |
| 5           | hsa-miR-874-3p    | MIMAT0004911    | 23.20            |
| 6           | hsa-miR-3605-3p   | MIMAT0017982    | 19.60            |
| 7           | hsa-miR-592       | MIMAT0003260    | 18.80            |
| 8           | hsa-miR-188-3p    | MIMAT0004613    | 16.40            |
| 9           | hsa-miR-30d-5p    | MIMAT0000245    | 13.60            |
| 10          | hsa-miR-218-1-3p  | MIMAT0004565    | 13.20            |
| 11          | hsa-miR-23a-5p    | MIMAT0004496    | 12.00            |
| 12          | hsa-miR-324-3p    | MIMAT0000762    | 11.20            |
| 13          | hsa-miR-10a-5p    | MIMAT0000253    | 10.40            |
| 14          | hsa-miR-431-3p    | MIMAT0004757    | 10.00            |
| 15          | hsa-miR-199b-5p   | MIMAT0000263    | 9.20             |
| 16          | hsa-miR-514a-3p   | MIMAT0002883    | 7.20             |
| 17          | hsa-miR-10b-5p    | MIMAT0000254    | 6.40             |
| 18          | hsa-let-7c-5p     | MIMAT0000064    | 5.60             |
| 19          | hsa-miR-27b-5p    | MIMAT0004588    | 5.60             |
| 20          | hsa-miR-192-5p    | MIMAT0000222    | 4.80             |
| 21          | hsa-miR-382-5p    | MIMAT0000737    | 4.40             |
| 22          | hsa-miR-625-3p    | MIMAT0004808    | 3.20             |
| 23          | hsa-miR-92b-3p    | MIMAT0003218    | 3.20             |
| 24          | hsa-miR-181a-2-3p | MIMAT0004558    | 0.80             |
| 25          | hsa-miR-3615      | MIMAT0017994    | 0.40             |
| 26          | hsa-miR-582-5p    | MIMAT0003247    | 0.40             |

**Supplementary Table S2.15.** Contribution of individual miRNAs using MED analysis in UVM

| <b>Rank</b> | <b>miRNA</b>    | <b>MIMAT-ID</b> | <b>MED-Score</b> |
|-------------|-----------------|-----------------|------------------|
| 1           | hsa-miR-335-5p  | MIMAT0000765    | 50.63            |
| 2           | hsa-miR-192-3p  | MIMAT0004543    | 45.57            |
| 3           | hsa-miR-3687    | MIMAT0018115    | 45.57            |
| 4           | hsa-miR-664a-5p | MIMAT0005948    | 35.44            |
| 5           | hsa-miR-1247-5p | MIMAT0005899    | 35.44            |
| 6           | hsa-miR-3613-3p | MIMAT0017991    | 20.25            |
| 7           | hsa-let-7i-3p   | MIMAT0004585    | 20.25            |
| 8           | hsa-miR-224-5p  | MIMAT0000281    | 20.25            |
| 9           | hsa-miR-3917    | MIMAT0018191    | 20.25            |

---

|    |                |              |       |
|----|----------------|--------------|-------|
| 10 | hsa-miR-20b-3p | MIMAT0004752 | 15.19 |
| 11 | hsa-miR-362-3p | MIMAT0004683 | 10.13 |
| 12 | hsa-miR-581    | MIMAT0003246 | 10.13 |
| 13 | hsa-miR-222-5p | MIMAT0004569 | 5.06  |

---

**Supplementary Table S3. Comparison of expression difference of has-let-7i-3p, has-miR-362-3p, and has-miR-3651 in cancer vs normal samples**

| <b>miRNA</b>  | <b>Cancer type</b>                    | <b>Fold change</b> | <b>log2(Fold change)</b> | <b>Mean RPM* (tumor)</b> | <b>Mean RPM* (normal)</b> | <b>p-value</b> | <b>adjusted p-value</b> |
|---------------|---------------------------------------|--------------------|--------------------------|--------------------------|---------------------------|----------------|-------------------------|
| hsa-let-7i-3p | Breast invasive carcinoma             | -2.05              | -1.04                    | 78.73                    | 161.63                    | 1.21e-26       | 5.6e-26                 |
|               | Kidney renal clear cell carcinoma     | 1.55               | 0.63                     | 80.23                    | 51.77                     | 3.35e-12       | 8.7e-12                 |
|               | Liver hepatocellular carcinoma        | -1.42              | -0.5                     | 36.06                    | 51.08                     | 8.39e-10       | 3.02e-9                 |
|               | Prostate adenocarcinoma               | -1.54              | -0.62                    | 16.8                     | 25.87                     | 1.06e-8        | 3.56e-8                 |
|               | Pan-kidney cohort (KICH+KIRC+KIRP)    | 1.26               | 0.33                     | 60.03                    | 47.83                     | 0.000107       | 0.000158                |
|               | Uterine Corpus Endometrial Carcinoma  | -1.2               | -0.26                    | 76.76                    | 92.02                     | 0.0022         | 0.00334                 |
|               | Lung adenocarcinoma                   | -1.17              | -0.23                    | 117.97                   | 138.33                    | 0.0124         | 0.019                   |
|               | Cholangiocarcinoma                    | 1.6                | 0.67                     | 53.7                     | 33.64                     | 0.00849        | 0.0219                  |
|               | Lung squamous cell carcinoma          | 1.21               | 0.27                     | 125.65                   | 104                       | 0.0227         | 0.0308                  |
|               | Stomach adenocarcinoma                | -1.82              | -0.86                    | 75.82                    | 137.73                    | 0.026          | 0.0386                  |
|               | Bladder Urothelial Carcinoma          | -1.13              | -0.18                    | 65.7                     | 74.31                     | 0.0328         | 0.0487                  |
|               | Kidney renal papillary cell carcinoma | -1.33              | -0.41                    | 33.11                    | 43.95                     | 0.0618         | 0.0772                  |
|               | Thyroid carcinoma                     | -1.09              | -0.12                    | 467.46                   | 508.8                     | 0.0642         | 0.0911                  |
|               | Stomach and Esophageal carcinoma      | -1.72              | -0.78                    | 66.97                    | 115.14                    | 0.178          | 0.213                   |
|               | Cervical squamous cell carcinoma and  | 1.58               | 0.66                     | 82.23                    | 52.11                     | 0.255          | 0.377                   |

|                |                                       |       |       |        |        |           |           |
|----------------|---------------------------------------|-------|-------|--------|--------|-----------|-----------|
|                | endocervical adenocarcinoma           |       |       |        |        |           |           |
|                | Pheochromocytoma and Paraganglioma    | 1.39  | 0.47  | 27.92  | 20.13  | 0.264     | 0.387     |
|                | Esophageal carcinoma                  | 1.15  | 0.2   | 45.82  | 40.02  | 0.294     | 0.42      |
|                | Kidney Chromophobe                    | -1.04 | -0.05 | 42.21  | 43.8   | 0.386     | 0.451     |
|                | Skin Cutaneous Melanoma               | -1.58 | -0.66 | 85.33  | 134.57 | 0.103     | 0.543     |
|                | Head and Neck squamous cell carcinoma | -1.05 | -0.07 | 112.93 | 118.22 | 0.597     | 0.638     |
|                | Thymoma                               | -1.11 | -0.15 | 69.61  | 77.46  | 0.238     | 0.678     |
|                | Pancreatic adenocarcinoma             | -1    | -0.01 | 76.59  | 76.9   | 0.92      | 0.981     |
| hsa-miR-362-3p | Pan-kidney cohort (KICH+KIRC+KIRP)    | -1.81 | -0.86 | 2.8    | 5.08   | 7.02E-16  | 1.76E-15  |
|                | Liver hepatocellular carcinoma        | 2.33  | 1.22  | 4.23   | 1.82   | 4.02E-16  | 3.93E-15  |
|                | Head and Neck squamous cell carcinoma | -1.92 | -0.94 | 2.44   | 4.69   | 7.64E-13  | 4.47E-12  |
|                | Lung squamous cell carcinoma          | -1.67 | -0.74 | 2.36   | 3.95   | 9.72E-12  | 2.99E-11  |
|                | Breast invasive carcinoma             | 1.94  | 0.96  | 1.63   | 0.84   | 1.98E-11  | 4.40E-11  |
|                | Kidney renal clear cell carcinoma     | -1.67 | -0.74 | 2.17   | 3.62   | 4.73E-09  | 9.64E-09  |
|                | Kidney renal papillary cell carcinoma | -2.4  | -1.26 | 2.96   | 7.12   | 1.21E-08  | 3.80E-08  |
|                | Stomach adenocarcinoma                | 1.72  | 0.78  | 3.91   | 2.28   | 0.0000132 | 0.0000379 |
|                | Bladder Urothelial Carcinoma          | 1.76  | 0.82  | 2.83   | 1.6    | 0.0013    | 0.00261   |
|                | Uterine Corpus Endometrial Carcinoma  | -1.4  | -0.48 | 4.73   | 6.6    | 0.00427   | 0.00633   |

|              |                                                                  |       |       |      |      |          |            |
|--------------|------------------------------------------------------------------|-------|-------|------|------|----------|------------|
|              | Stomach and Esophageal carcinoma                                 | 1.31  | 0.39  | 3.77 | 2.88 | 0.00446  | 0.00717    |
|              | Lung adenocarcinoma                                              | -1.22 | -0.29 | 2.53 | 3.09 | 0.0274   | 0.0395     |
|              | Esophageal carcinoma                                             | -1.4  | -0.49 | 3.41 | 4.78 | 0.0443   | 0.0938     |
|              | Thyroid carcinoma                                                | -1.1  | -0.14 | 2.3  | 2.54 | 0.0931   | 0.129      |
|              | Kidney Chromophobe                                               | 1     | 0     | 5.63 | 5.61 | 0.353    | 0.417      |
|              | Pancreatic adenocarcinoma                                        | -1.47 | -0.56 | 2.44 | 3.59 | 0.121    | 0.438      |
|              | Thymoma                                                          | 2.7   | 1.43  | 4.93 | 1.83 | 0.0376   | 0.509      |
|              | Skin Cutaneous Melanoma                                          | 3.8   | 1.93  | 4.69 | 1.23 | 0.12     | 0.574      |
|              | Pheochromocytoma and Paraganglioma                               | -1    | 0     | 2.51 | 2.51 | 0.459    | 0.59       |
|              | Prostate adenocarcinoma                                          | -1.06 | -0.08 | 2.32 | 2.45 | 0.603    | 0.663      |
|              | Cervical squamous cell carcinoma and endocervical adenocarcinoma | -1.06 | -0.08 | 3.5  | 3.71 | 0.6      | 0.689      |
| hsa-miR-3651 | Lung squamous cell carcinoma                                     | 3.8   | 1.93  | 2.05 | 0.54 | 1.49E-12 | 4.87E-12   |
|              | Uterine Corpus Endometrial Carcinoma                             | 3.78  | 1.92  | 2.15 | 0.57 | 5.02E-09 | 1.39E-08   |
|              | Stomach and Esophageal carcinoma                                 | 3.29  | 1.72  | 2.11 | 0.64 | 8.20E-08 | 3.21E-07   |
|              | Head and Neck squamous cell carcinoma                            | 2.98  | 1.58  | 1.87 | 0.62 | 1.15E-07 | 3.23E-07   |
|              | Breast invasive carcinoma                                        | 2.18  | 1.12  | 1.35 | 0.62 | 1.42E-06 | 0.00000236 |
|              | Stomach adenocarcinoma                                           | 3.15  | 1.65  | 1.57 | 0.5  | 9.66E-07 | 0.00000342 |
|              | Kidney Chromophobe                                               | 4.68  | 2.23  | 0.47 | 0.1  | 9.91E-06 | 0.0000255  |
|              | Thyroid carcinoma                                                | -1.53 | -0.61 | 1.02 | 1.57 | 0.0114   | 0.0186     |

|                                          |       |       |      |      |        |        |
|------------------------------------------|-------|-------|------|------|--------|--------|
| Esophageal carcinoma                     | 3.11  | 1.64  | 3.38 | 1.09 | 0.0417 | 0.0903 |
| Pan-kidney cohort<br>(KICH+KIRC+KIRP)    | 1.62  | 0.7   | 0.44 | 0.27 | 0.211  | 0.235  |
| Liver hepatocellular<br>carcinoma        | 1.44  | 0.53  | 0.85 | 0.59 | 0.216  | 0.263  |
| Pancreatic<br>adenocarcinoma             | -1.24 | -0.31 | 0.27 | 0.34 | 0.498  | 0.757  |
| Kidney renal papillary cell<br>carcinoma | 1.28  | 0.36  | 0.42 | 0.33 | 0.74   | 0.768  |
| Thymoma                                  | 1.95  | 0.97  | 0.75 | 0.38 | 0.838  | 0.964  |



**Supplementary Table S4. Co-expression analysis of miRNA signatures across 15 cancers**

| <b>Cancer</b>   | <b>BLCA-Signature</b> | <b>Correlated miRNAs</b> | <b>R</b>        |
|-----------------|-----------------------|--------------------------|-----------------|
| <b>BLCA</b>     | hsa.miR.136.5p        | hsa.miR.127.5p           | 0.85083         |
|                 | hsa.miR.337.3p        | hsa.miR.493.5p           | 0.87111         |
|                 |                       | hsa.miR.431.3p           | 0.86363         |
|                 |                       | hsa.miR.432.5p           | 0.85247         |
|                 |                       | hsa.miR.487b.3p          | 0.84928         |
|                 |                       | hsa.miR.654.3p           | 0.84251         |
|                 |                       | hsa.miR.127.5p           | 0.83623         |
|                 |                       | hsa.miR.409.3p           | 0.82585         |
|                 |                       | hsa.miR.758.3p           | 0.82543         |
|                 |                       | hsa.miR.379.5p           | 0.81228         |
|                 |                       | hsa.miR.376c.3p          | 0.81211         |
|                 |                       | hsa.miR.370.3p           | 0.80815         |
|                 |                       | hsa.miR.512.3p           | hsa.miR.526b.5p |
|                 | hsa.miR.27a.3p        | hsa.miR.23a.3p           | 0.86959         |
|                 | hsa.miR.199a.5p       | hsa.miR.214.5p           | 0.88195         |
|                 | hsa.miR.526b.5p       | hsa.miR.512.3p           | 0.87879         |
|                 | hsa.miR.660.5p        | hsa.miR.532.5p           | 0.82708         |
|                 | hsa.miR.411.5p        | hsa.miR.379.5p           | 0.90819         |
|                 |                       | hsa.miR.127.3p           | 0.88842         |
|                 |                       | hsa.miR.654.3p           | 0.84351         |
|                 |                       | hsa.miR.134.5p           | 0.83746         |
|                 |                       | hsa.miR.376c.3p          | 0.82878         |
|                 |                       | hsa.miR.381.3p           | 0.8251          |
| hsa.miR.889.3p  |                       | 0.8228                   |                 |
| hsa.miR.369.5p  |                       | 0.82235                  |                 |
| hsa.miR.382.5p  |                       | 0.81615                  |                 |
| hsa.miR.410.3p  |                       | 0.81458                  |                 |
| hsa.miR.493.3p  |                       | 0.8135                   |                 |
| hsa.miR.758.3p  | 0.81267               |                          |                 |
| <b>BRCA</b>     | hsa.miR.379           | hsa.miR.127              | 0.8525          |
|                 |                       | hsa.miR.758              | 0.83849         |
|                 |                       | hsa.miR.410              | 0.80367         |
| hsa.miR.500a    | hsa.miR.501           | 0.84981                  |                 |
| <b>COAD</b>     | hsa.miR.450b.5p       | hsa.miR.542.3p           | 0.86189         |
|                 | hsa.miR.17.3p         | hsa.miR.20a.5p           | 0.80638         |
|                 | hsa.miR.500a.3p       | hsa.miR.501.3p           | 0.90779         |
|                 |                       | hsa.miR.532.5p           | 0.86472         |
|                 | hsa.miR.127.5p        | hsa.miR.136.5p           | 0.82682         |
|                 | hsa.miR.125b.2.3p     | hsa.miR.99a.5p           | 0.8971          |
| hsa.let.7c.5p   |                       | 0.86362                  |                 |
| hsa.miR.125b.5p |                       | 0.81756                  |                 |

|                 |                 |                 |              |
|-----------------|-----------------|-----------------|--------------|
| <b>ESCA</b>     | hsa.miR.191.5p  | hsa.miR.425.5p  | 0.8532       |
|                 | hsa.miR.199a.5p | hsa.miR.214.5p  | 0.88019      |
|                 | hsa.miR.23a.3p  | hsa.miR.27a.3p  | 0.86622      |
|                 | hsa.miR.487b.3p | hsa.miR.127.3p  | 0.81253      |
|                 |                 | hsa.miR.889.3p  | 0.80128      |
|                 | hsa.miR.508.3p  | hsa.miR.509.3p  | 0.89842      |
|                 |                 | hsa.miR.514a.3p | 0.8673       |
| hsa.miR.514a.3p | hsa.miR.508.3p  | 0.8673          |              |
|                 | hsa.miR.509.3p  | 0.83004         |              |
| hsa.miR.432.5p  | hsa.miR.431.3p  | 0.84021         |              |
|                 | hsa.miR.382.5p  | 0.80104         |              |
| <b>HNSC</b>     | hsa.miR.493.3p  | hsa.miR.409.3p  | 0.87754      |
|                 |                 | hsa.miR.382.5p  | 0.85962      |
|                 |                 | hsa.miR.889.3p  | 0.85175      |
|                 |                 | hsa.miR.758.3p  | 0.84649      |
|                 |                 | hsa.miR.127.3p  | 0.84367      |
|                 |                 | hsa.miR.493.5p  | 0.83876      |
|                 |                 | hsa.miR.432.5p  | 0.8339       |
|                 |                 | hsa.miR.379.5p  | 0.82919      |
|                 |                 | hsa.miR.410.3p  | 0.82704      |
|                 |                 | hsa.miR.370.3p  | 0.81859      |
|                 |                 | hsa.miR.134.5p  | 0.81074      |
|                 |                 | hsa.miR.431.3p  | 0.81054      |
|                 |                 | hsa.miR.654.3p  | 0.80543      |
|                 |                 | hsa.miR.206     | hsa.miR.133b |
|                 | hsa.miR.1.3p    |                 | 0.94774      |
|                 | hsa.miR.18a.5p  | hsa.miR.17.5p   | 0.82446      |
|                 |                 | hsa.miR.19a.3p  | 0.82434      |
|                 | hsa.miR.409.3p  | hsa.miR.382.5p  | 0.93486      |
|                 |                 | hsa.miR.758.3p  | 0.89757      |
|                 |                 | hsa.miR.134.5p  | 0.88559      |
|                 |                 | hsa.miR.379.5p  | 0.8779       |
|                 |                 | hsa.miR.493.3p  | 0.87754      |
| hsa.miR.889.3p  |                 | 0.87683         |              |
| hsa.miR.127.3p  |                 | 0.87673         |              |
| hsa.miR.432.5p  |                 | 0.87539         |              |
| hsa.miR.493.5p  |                 | 0.86652         |              |
| hsa.miR.370.3p  |                 | 0.85972         |              |
| hsa.miR.654.3p  |                 | 0.85626         |              |
| hsa.miR.431.3p  |                 | 0.84675         |              |
| hsa.miR.410.3p  |                 | 0.82573         |              |
| hsa.miR.337.3p  |                 | 0.81909         |              |
| hsa.miR.485.3p  |                 | 0.80923         |              |
| hsa.miR.487b.3p | 0.8017          |                 |              |

|              |                 |                 |         |
|--------------|-----------------|-----------------|---------|
|              |                 | hsa.miR.127.5p  | 0.80004 |
| <b>KIRC</b>  | hsa.miR.144.5p  | hsa.miR.451a    | 0.94915 |
|              |                 | hsa.miR.486.5p  | 0.92824 |
|              | hsa.miR.489.3p  | hsa.miR.653.5p  | 0.81512 |
| <b>KIRP</b>  | hsa.miR.224.5p  | hsa.miR.452.5p  | 0.8625  |
|              | hsa.miR.542.5p  | hsa.miR.450b.5p | 0.82058 |
| <b>LIHCC</b> | hsa-miR-518b    | hsa-miR-512     | 0.88368 |
|              |                 | hsa-miR-525     | 0.88135 |
|              |                 | hsa-miR-517     | 0.88    |
|              |                 | hsa-miR-520a    | 0.87077 |
|              |                 | hsa-miR-526b    | 0.86433 |
|              |                 | hsa-miR-519a    | 0.85918 |
|              |                 | hsa-miR-516a    | 0.84481 |
|              |                 | hsa-miR-522     | 0.84263 |
|              |                 | hsa-miR-1323    | 0.80711 |
|              | hsa-miR-512     | hsa-miR-518b    | 0.87175 |
|              |                 | hsa-miR-525     | 0.86591 |
|              |                 | hsa-miR-520b    | 0.85993 |
|              |                 | hsa-miR-519a    | 0.85658 |
|              |                 | hsa-miR-522     | 0.85275 |
|              |                 | hsa-miR-516a    | 0.8434  |
|              |                 | hsa-miR-526b    | 0.84138 |
| hsa-miR-517a |                 | 0.83647         |         |
|              | hsa-miR-1323    | 0.82907         |         |
| <b>LUAD</b>  | hsa.miR.144.5p  | hsa.miR.451a    | 0.8937  |
|              | hsa.miR.376c.3p | hsa.miR.495.3p  | 0.8324  |
|              |                 | hsa.miR.487b.3p | 0.82167 |
|              |                 | hsa.miR.381.3p  | 0.82055 |
|              |                 | hsa.miR.382.5p  | 0.81617 |
|              |                 | hsa.miR.654.3p  | 0.81027 |
|              |                 | hsa.miR.889.3p  | 0.80956 |
|              |                 | hsa.miR.493.5p  | 0.80489 |
|              |                 | hsa.miR.134.5p  | 0.80376 |
|              |                 | hsa.miR.379.5p  | 0.80133 |
|              | hsa.miR.369.3p  | 0.8001          |         |
| <b>LUSC</b>  | NA              | NA              | NA      |
| <b>READ</b>  | hsa.miR.140.5p  | hsa.miR.126.3p  | 0.82597 |
|              | hsa.miR.200b.3p | hsa.miR.429     | 0.85611 |
| <b>SKCM</b>  | hsa.miR.194.5p  | hsa.miR.192.5p  | 0.83789 |
|              | hsa.miR.486.5p  | hsa.miR.451a    | 0.92664 |
|              |                 | hsa.miR.144.5p  | 0.80551 |
| <b>STAD</b>  | hsa.miR.141.5p  | hsa.miR.200c.3p | 0.8094  |
|              | hsa.miR.127.5p  | hsa.miR.134.5p  | 0.89068 |
|              |                 | hsa.miR.136.5p  | 0.86676 |

|                |                 |                |                |
|----------------|-----------------|----------------|----------------|
|                |                 | hsa.miR.409.5p | 0.83392        |
|                |                 | hsa.miR.337.3p | 0.82606        |
|                | hsa.miR.221.3p  | hsa.miR.222.3p | 0.89969        |
| <b>THCA</b>    | hsa.miR.199b.5p | hsa.miR.214.5p | 0.86736        |
|                |                 | hsa.miR.136.5p | 0.84914        |
|                |                 | hsa.miR.127.5p | 0.81443        |
|                | hsa.miR.514a.3p | hsa.miR.509.3p | 0.86009        |
|                |                 | hsa.miR.508.3p | 0.83453        |
|                | hsa.miR.192.5p  | hsa.miR.194.5p | 0.8509         |
|                |                 | hsa.miR.409.3p | 0.87451        |
|                |                 | hsa.miR.337.3p | 0.8741         |
|                |                 | hsa.miR.134.5p | 0.87061        |
|                |                 | hsa.miR.889.3p | 0.86136        |
|                |                 | hsa.miR.381.3p | 0.86114        |
|                |                 | hsa.miR.127.5p | 0.85932        |
|                |                 | hsa.miR.127.3p | 0.85734        |
|                |                 | hsa.miR.379.5p | 0.84578        |
|                |                 | hsa.miR.136.5p | 0.83969        |
|                |                 | hsa.miR.758.3p | 0.83922        |
|                |                 | hsa.miR.136.3p | 0.83552        |
|                |                 | hsa.miR.654.3p | 0.83144        |
|                |                 | hsa.miR.409.5p | 0.82336        |
| hsa.miR.493.5p |                 | 0.82297        |                |
| hsa.miR.410.3p |                 | 0.80161        |                |
| <b>UVM</b>     |                 | hsa.miR.224.5p | hsa.miR.452.5p |

Abbreviations: NA- Not Available.

**Supplementary Table S5.** Top-10 ranked miRNAs involvement in BLCA

| <b>Rank</b> | <b>BLCA</b>      | <b>Literature</b> |
|-------------|------------------|-------------------|
| Rank-1      | hsa-miR-31-3p    | 1                 |
| Rank-2      | hsa-miR-29b-2-5p | 2, 3              |
| Rank-3      | hsa-miR-193b-3p  | 4, 5              |
| Rank-4      | hsa-miR-10b-5p   | 6                 |
| Rank-5      | hsa-miR-125a-3p  | 7, 8              |
| Rank-6      | hsa-miR-136-5p   | -                 |
| Rank-7      | hsa-miR-3912-3p  | -                 |
| Rank-8      | hsa-miR-205-5p   | 9, 10             |
| Rank-9      | hsa-miR-337-3p   | 11                |
| Rank-10     | hsa-miR-29a-5p   | 12                |

**Supplementary Table S6.** Top-10 ranked miRNAs involvement in BRCA

| <b>Rank</b> | <b>BRCA</b>     | <b>Literature</b> |
|-------------|-----------------|-------------------|
| 1           | hsa-miR-200c-5p | 13, 14            |
| 2           | hsa-miR-503     | 15                |
| 3           | hsa-miR-1307-3p | 16                |
| 4           | hsa-miR-361-3p  | 17                |
| 5           | hsa-miR-212     | 18                |
| 6           | hsa-miR-592     | 19                |
| 7           | hsa-miR-1185-1  | -                 |
| 8           | hsa-miR-146b    | 20                |
| 9           | hsa-miR-1468-5p | -                 |
| 10          | hsa-miR-769-3p  | 21                |

**Supplementary Table S7.** Top-10 ranked miRNAs involvement in COAD

| <b>Rank</b> | <b>COAD</b>     | <b>Literature</b> |
|-------------|-----------------|-------------------|
| 1           | hsa-miR-188-3p  | 22                |
| 2           | hsa-miR-1976    | -                 |
| 3           | hsa-miR-320a    | 23                |
| 4           | hsa-miR-450b-5p | 24                |
| 5           | hsa-miR-140-3p  | 25                |
| 6           | hsa-miR-17-3p   | 26                |
| 7           | hsa-miR-301a-3p | 27                |
| 8           | hsa-miR-582-5p  | -                 |
| 9           | hsa-miR-491-3p  | 28                |
| 10          | hsa-miR-501-5p  | -                 |

**Supplementary Table S8.** Top-10 ranked miRNAs involvement in ESCA

| <b>Rank</b> | <b>ESCA</b>     | <b>Literature</b> |
|-------------|-----------------|-------------------|
| 1           | hsa-miR-708-5p  | 29, 30            |
| 2           | hsa-miR-199a-5p | 31, 32            |
| 3           | hsa-miR-33b-5p  | 33, 34            |
| 4           | hsa-miR-23a-3p  | 35                |
| 5           | hsa-miR-423-5p  | 36                |
| 6           | hsa-miR-193b-5p | 37                |
| 7           | hsa-miR-3677-3p | 38                |
| 8           | hsa-miR-362-3p  | 39                |
| 9           | hsa-miR-487b-3p | -                 |
| 10          | hsa-miR-508-3p  | 40                |

**Supplementary Table S9.** Top-10 ranked miRNAs involvement in HNSC

| <b>Rank</b> | <b>HNSC</b>       | <b>Literature</b> |
|-------------|-------------------|-------------------|
| 1           | hsa-miR-93-3p     | 41, 42            |
| 2           | hsa-miR-335-5p    | 43                |
| 3           | hsa-miR-219a-1-3p | -                 |
| 4           | hsa-miR-361-3p    | -                 |
| 5           | hsa-miR-493-3p    | 44                |
| 6           | hsa-miR-188-3p    | -                 |
| 7           | hsa-miR-3690      | 45                |
| 8           | hsa-miR-103a-3p   | 46                |
| 9           | hsa-miR-101-5p    | 47                |
| 10          | hsa-miR-206       | 48, 49            |

**Supplementary Table S10.** Top-10 ranked miRNAs involvement in KIRC

| <b>Rank</b> | <b>KIRC</b>     | <b>Literature</b> |
|-------------|-----------------|-------------------|
| 1           | hsa-miR-144-5p  | 50                |
| 2           | hsa-miR-744-5p  | -                 |
| 3           | hsa-miR-550a-3p | -                 |
| 4           | hsa-miR-1296-5p | -                 |
| 5           | hsa-let-7i-3p   | 51                |
| 6           | hsa-miR-18a-5p  | 52                |

|    |                |        |
|----|----------------|--------|
| 7  | hsa-miR-628-5p | -      |
| 8  | hsa-miR-197-3p | 51     |
| 9  | hsa-miR-222-5p | 53     |
| 10 | hsa-miR-126-3p | 54, 55 |

**Supplementary Table S11.** Top-10 ranked miRNAs involvement in KIRP

| <b>Rank</b> | <b>KIRP</b>     | <b>Literature</b> |
|-------------|-----------------|-------------------|
| 1           | hsa-miR-491-5p  | -                 |
| 2           | hsa-miR-769-5p  | 56                |
| 3           | hsa-miR-29c-5p  | -                 |
| 4           | hsa-miR-16-5p   | 57                |
| 5           | hsa-miR-200b-5p | 58                |
| 6           | hsa-miR-485-3p  | 59                |
| 7           | hsa-miR-22-5p   | 58                |
| 8           | hsa-miR-629-3p  | -                 |
| 9           | hsa-miR-320b    | 57                |
| 10          | hsa-miR-217     | 60                |

**Supplementary Table S12.** Top-10 ranked miRNAs involvement in LIHCC

| <b>Rank</b> | <b>LIHCC</b>   | <b>Literature</b> |
|-------------|----------------|-------------------|
| 1           | hsa-miR-550a-2 | 61                |
| 2           | hsa-miR-549    | -                 |
| 3           | hsa-miR-518b   | 62                |
| 4           | hsa-miR-512-2  | 63                |
| 5           | hsa-miR-1179   | 64                |
| 6           | hsa-miR-574-3p | 65                |
| 7           | hsa-miR-424-3p | 66                |
| 8           | hsa-miR-4286   | 67                |
| 9           | hsa-let-7i-3p  | 68                |
| 10          | hsa-miR-320a   | 69                |

**Supplementary Table S13.** Top-10 ranked miRNAs involvement in LUAD

| <b>Rank</b> | <b>LUAD</b> | <b>Literature</b> |
|-------------|-------------|-------------------|
|-------------|-------------|-------------------|

|    |                 |    |
|----|-----------------|----|
| 1  | hsa-miR-671-5p  | 70 |
| 2  | hsa-miR-3651    | 71 |
| 3  | hsa-miR-1304-5p | 72 |
| 4  | hsa-miR-342-3p  | 73 |
| 5  | hsa-miR-548v    | 74 |
| 6  | hsa-miR-296-3p  | 71 |
| 7  | hsa-miR-598-3p  | 75 |
| 8  | hsa-miR-190a-5p | -  |
| 9  | hsa-miR-144-5p  | 76 |
| 10 | hsa-miR-185-3p  | 76 |

**Supplementary Table S14.** Top-10 ranked miRNAs involvement in LUSC

| <b>Rank</b> | <b>LUSC</b>       | <b>Literature</b> |
|-------------|-------------------|-------------------|
| 1           | hsa-miR-181a-2-3p | 77                |
| 2           | hsa-miR-664a-3p   | -                 |
| 3           | hsa-miR-769-3p    | 78                |
| 4           | hsa-miR-29b-2-5p  | 79                |
| 5           | hsa-miR-3614-5p   | 80                |
| 6           | hsa-miR-214-3p    | 81                |
| 7           | hsa-miR-200c-5p   | 82, 83            |
| 8           | hsa-miR-3613-5p   | 84                |
| 9           | hsa-miR-196a-5p   | 85                |
| 10          | hsa-miR-551b-3p   | 86                |

**Supplementary Table S15.** Top-10 ranked miRNAs involvement in SKCM

| <b>Rank</b> | <b>SKCM</b>      | <b>Literature</b> |
|-------------|------------------|-------------------|
| 1           | hsa-miR-211-5p   | 87                |
| 2           | hsa-miR-194-5p   | 88                |
| 3           | hsa-miR-3614-5p  | -                 |
| 4           | hsa-miR-326      | -                 |
| 5           | hsa-miR-4326     | -                 |
| 6           | hsa-miR-1180-3p  | 89                |
| 7           | hsa-miR-664a-3p  | 90                |
| 8           | hsa-miR-26a-1-3p | 91                |
| 9           | hsa-miR-132-5p   | 92                |



|    |              |    |
|----|--------------|----|
| 10 | hsa-miR-1538 | 93 |
|----|--------------|----|

**Supplementary Table S16.** Top-10 ranked miRNAs involvement in STAD

| <b>Rank</b> | <b>STAD</b>     | <b>Literature</b> |
|-------------|-----------------|-------------------|
| 1           | hsa-miR-130a-3p | 94                |
| 2           | hsa-miR-320b    | 95, 96            |
| 3           | hsa-miR-141-5p  | 97                |
| 4           | hsa-miR-3065-5p | 98                |
| 5           | hsa-miR-887-3p  | -                 |
| 6           | hsa-miR-362-3p  | 99                |
| 7           | hsa-miR-135a-5p | 100               |
| 8           | hsa-miR-21-3p   | 101, 102          |
| 9           | hsa-miR-148b-3p | 103               |
| 10          | hsa-miR-580-3p  | -                 |

**Supplementary Table S17.** Top-10 ranked miRNAs involvement in THCA

| <b>Rank</b> | <b>THCA</b>      | <b>Literature</b> |
|-------------|------------------|-------------------|
| 1           | hsa-miR-940      | 104               |
| 2           | hsa-let-7i-5p    | 105               |
| 3           | hsa-miR-1249-3p  | 106               |
| 4           | hsa-miR-101-5p   | 107               |
| 5           | hsa-miR-874-3p   | 108               |
| 6           | hsa-miR-3605-3p  | -                 |
| 7           | hsa-miR-592      | -                 |
| 8           | hsa-miR-188-3p   | 109               |
| 9           | hsa-miR-30d-5p   | 110               |
| 10          | hsa-miR-218-1-3p | 111               |

**Supplementary Table S18.** Top-10 ranked miRNAs involvement in READ

| <b>Rank</b> | <b>READ</b>     | <b>Literature</b> |
|-------------|-----------------|-------------------|
| 1           | hsa-miR-10a-5p  | 112               |
| 2           | hsa-miR-9-5p    | 113               |
| 3           | hsa-miR-135b-3p | 114               |
| 4           | hsa-miR-491-5p  | 115               |

|    |                 |     |
|----|-----------------|-----|
| 5  | hsa-miR-31-3p   | 116 |
| 6  | hsa-miR-656-3p  | 117 |
| 7  | hsa-miR-140-5p  | 118 |
| 8  | hsa-miR-1269a   | 119 |
| 9  | hsa-miR-1468-5p | 120 |
| 10 | hsa-miR-935     | -   |

**Supplementary Table S19.** Top-10 ranked miRNAs involvement in UVM

| <b>Rank</b> | <b>UVM</b>      | <b>Literature</b> |
|-------------|-----------------|-------------------|
| 1           | hsa-miR-335-5p  | 121               |
| 2           | hsa-miR-192-3p  | 122               |
| 3           | hsa-miR-3687    | -                 |
| 4           | hsa-miR-664a-5p | 121               |
| 5           | hsa-miR-1247-5p | 123               |
| 6           | hsa-miR-3613-3p | -                 |
| 7           | hsa-let-7i-3p   | -                 |
| 8           | hsa-miR-224-5p  | 124               |
| 9           | hsa-miR-3917    | -                 |
| 10          | hsa-miR-20b-3p  | -                 |

**Supplementary Table S20.** MiRNAs that were not previously reported in cancers

| <b>Cancer type</b> | <b>miRNA previously not reported</b> | <b>Rank of the miRNA in the signature</b> |
|--------------------|--------------------------------------|-------------------------------------------|
| BLCA               | hsa-miR-136-5p                       | 6                                         |
|                    | hsa-miR-3912-3p                      | 7                                         |
| BRCA               | hsa-miR-1185-1                       | 7                                         |
|                    | hsa-miR-1468-5p                      | 9                                         |
| COAD               | hsa-miR-1976                         | 2                                         |
|                    | hsa-miR-582-5p                       | 8                                         |
|                    | hsa-miR-501-5p                       | 10                                        |
| ESCA               | hsa-miR-487b-3p                      | 9                                         |
| HNSC               | hsa-miR-219a-1-3p                    | 3                                         |
|                    | hsa-miR-361-3p                       | 4                                         |
|                    | hsa-miR-188-3p                       | 6                                         |
| KIRC               | hsa-miR-744-5p                       | 3                                         |
|                    | hsa-miR-550a-3p                      | 4                                         |
|                    | hsa-miR-1296-5p                      | 5                                         |
|                    | hsa-miR-628-5p                       | 7                                         |
| KIRP               | hsa-miR-491-5p                       | 1                                         |

|       |                 |    |
|-------|-----------------|----|
|       | hsa-miR-29c-5p  | 3  |
|       | hsa-miR-629-3p  | 8  |
| LIHCC | hsa-miR-549     | 2  |
| LUAD  | hsa-miR-190a-5p | 8  |
| LUSC  | hsa-miR-664a-3p | 2  |
| SKCM  | hsa-miR-3614-5p | 3  |
|       | hsa-miR-326     | 4  |
|       | hsa-miR-4326    | 5  |
| STAD  | hsa-miR-887-3p  | 5  |
|       | hsa-miR-580-3p  | 10 |
| THCA  | hsa-miR-3605-3p | 6  |
|       | hsa-miR-592     | 7  |
| READ  | hsa-miR-935     | 10 |
| UVM   | hsa-miR-3687    | 3  |
|       | hsa-miR-3613-3p | 6  |
|       | hsa-let-7i-3p   | 7  |
|       | hsa-miR-3917    | 9  |
|       | hsa-miR-20b-3p  | 10 |

**Supplementary Table S21.** KEGG pathway analysis of miRNA signatures across 15 cancers

| Cancer | KEGG pathway                                             | p-value  |
|--------|----------------------------------------------------------|----------|
| BLCA   | Proteoglycans in cancer                                  | 5.55E-11 |
|        | Glioma                                                   | 1.08E-06 |
|        | ECM-receptor interaction                                 | 1.66E-06 |
|        | ErbB signaling pathway                                   | 2.95E-06 |
|        | Axon guidance                                            | 8.06E-06 |
|        | Signaling pathways regulating pluripotency of stem cells | 8.53E-06 |
|        | Phosphatidylinositol signaling system                    | 1.6E-05  |
|        | Renal cell carcinoma                                     | 6.8E-05  |
|        | Prion diseases                                           | 0.00011  |
|        | Neurotrophin signaling pathway                           | 0.00015  |
|        | Acute myeloid leukemia                                   | 0.00057  |
|        | mTOR signaling pathway                                   | 0.00084  |
|        | TGF-beta signaling pathway                               | 0.00084  |
|        | Pathways in cancer                                       | 0.00084  |
|        | Ras signaling pathway                                    | 0.00093  |
|        | Hippo signaling pathway                                  | 0.00093  |
|        | Focal adhesion                                           | 0.00093  |
|        | Colorectal cancer                                        | 0.00123  |
|        | Endometrial cancer                                       | 0.00134  |
|        | Rap1 signaling pathway                                   | 0.00178  |

|             |                                                          |          |
|-------------|----------------------------------------------------------|----------|
|             | Choline metabolism in cancer                             | 0.00246  |
|             | Prolactin signaling pathway                              | 0.00248  |
|             | Circadian rhythm                                         | 0.00307  |
|             | Gap junction                                             | 0.00324  |
|             | Prostate cancer                                          | 0.00324  |
|             | Wnt signaling pathway                                    | 0.00324  |
|             | T cell receptor signaling pathway                        | 0.004    |
|             | Melanoma                                                 | 0.00468  |
|             | AMPK signaling pathway                                   | 0.00468  |
| <b>BRCA</b> | KEGG pathway                                             | p-value  |
|             | Mucin type O-Glycan biosynthesis                         | 3.02E-15 |
|             | Proteoglycans in cancer                                  | 6.30E-13 |
|             | Hippo signaling pathway                                  | 2.01E-09 |
|             | ECM-receptor interaction                                 | 4.29E-09 |
|             | Signaling pathways regulating pluripotency of stem cells | 6.02E-07 |
|             | FoxO signaling pathway                                   | 1.03E-05 |
|             | TGF-beta signaling pathway                               | 1.25E-05 |
|             | Renal cell carcinoma                                     | 1.34E-05 |
|             | Focal adhesion                                           | 1.51E-05 |
|             | Axon guidance                                            | 1.88E-05 |
|             | Adherens junction                                        | 7.60E-05 |
|             | Wnt signaling pathway                                    | 7.60E-05 |
|             | Rap1 signaling pathway                                   | 8.12E-05 |
|             | Prion diseases                                           | 9.47E-05 |
|             | Glioma                                                   | 0.00012  |
|             | Ras signaling pathway                                    | 0.00032  |
|             | MAPK signaling pathway                                   | 0.00037  |
|             | Thyroid hormone signaling pathway                        | 0.00107  |
|             | Endocytosis                                              | 0.00144  |
|             | Pathways in cancer                                       | 0.00161  |
|             | Circadian rhythm                                         | 0.00212  |
|             | Choline metabolism in cancer                             | 0.00212  |
|             | ErbB signaling pathway                                   | 0.00212  |
|             | Melanoma                                                 | 0.0032   |
|             | Bacterial invasion of epithelial cells                   | 0.00377  |
| <b>COAD</b> | Morphine addiction                                       | 2.04E-07 |
|             | Signaling pathways regulating pluripotency of stem cells | 5.03E-07 |
|             | Prion diseases                                           | 2.95E-06 |
|             | Proteoglycans in cancer                                  | 2.95E-06 |

|             |                                                          |          |
|-------------|----------------------------------------------------------|----------|
|             | Glutamatergic synapse                                    | 6E-06    |
|             | Axon guidance                                            | 6E-06    |
|             | Transcriptional misregulation in cancer                  | 1.8E-05  |
|             | Adrenergic signaling in cardiomyocytes                   | 2.9E-05  |
|             | Hippo signaling pathway                                  | 0.00017  |
|             | Wnt signaling pathway                                    | 0.00027  |
|             | Long-term depression                                     | 0.00034  |
|             | Glioma                                                   | 0.00034  |
|             | FoxO signaling pathway                                   | 0.00044  |
|             | Amphetamine addiction                                    | 0.00054  |
|             | Circadian rhythm                                         | 0.00063  |
|             | Estrogen signaling pathway                               | 0.00064  |
|             | cAMP signaling pathway                                   | 0.00075  |
|             | Oxytocin signaling pathway                               | 0.00075  |
|             | Focal adhesion                                           | 0.00085  |
|             | TGF-beta signaling pathway                               | 0.00089  |
|             | Retrograde endocannabinoid signaling                     | 0.00106  |
|             | Regulation of actin cytoskeleton                         | 0.00167  |
|             | Renal cell carcinoma                                     | 0.00257  |
|             | Colorectal cancer                                        | 0.00305  |
|             | Dopaminergic synapse                                     | 0.00399  |
| <b>ESCA</b> | Axon guidance                                            | 3.30E-05 |
|             | FoxO signaling pathway                                   | 3.30E-05 |
|             | Glioma                                                   | 3.30E-05 |
|             | Long-term depression                                     | 5.83E-05 |
|             | GABAergic synapse                                        | 8.00E-05 |
|             | Glutamatergic synapse                                    | 0.00021  |
|             | Non-small cell lung cancer                               | 0.00035  |
|             | Renal cell carcinoma                                     | 0.00035  |
|             | Phosphatidylinositol signaling system                    | 0.00056  |
|             | Gap junction                                             | 0.00056  |
|             | Aldosterone-regulated sodium reabsorption                | 0.0007   |
|             | Morphine addiction                                       | 0.00112  |
|             | TGF-beta signaling pathway                               | 0.0013   |
|             | Retrograde endocannabinoid signaling                     | 0.0013   |
|             | Prolactin signaling pathway                              | 0.00138  |
|             | ErbB signaling pathway                                   | 0.00138  |
|             | Circadian rhythm                                         | 0.00154  |
|             | Thyroid hormone signaling pathway                        | 0.00154  |
|             | Signaling pathways regulating pluripotency of stem cells | 0.00154  |

|             |                                                          |          |
|-------------|----------------------------------------------------------|----------|
|             | Proteoglycans in cancer                                  | 0.00195  |
|             | Oxytocin signaling pathway                               | 0.00251  |
|             | Adrenergic signaling in cardiomyocytes                   | 0.00295  |
|             | Estrogen signaling pathway                               | 0.00295  |
|             | Platelet activation                                      | 0.00342  |
|             | MAPK signaling pathway                                   | 0.00387  |
|             | Melanoma                                                 | 0.00405  |
|             | Ras signaling pathway                                    | 0.0041   |
|             | Long-term potentiation                                   | 0.00435  |
| <b>HNSC</b> | Prion diseases                                           | 9.28E-08 |
|             | Proteoglycans in cancer                                  | 9.28E-08 |
|             | Fatty acid biosynthesis                                  | 1.22E-06 |
|             | cGMP-PKG signaling pathway                               | 0.00022  |
|             | Adherens junction                                        | 0.00038  |
|             | Adrenergic signaling in cardiomyocytes                   | 0.00042  |
|             | Gap junction                                             | 0.00068  |
|             | AMPK signaling pathway                                   | 0.00068  |
|             | Rap1 signaling pathway                                   | 0.00068  |
|             | Signaling pathways regulating pluripotency of stem cells | 0.00072  |
|             | GABAergic synapse                                        | 0.00186  |
|             | Hippo signaling pathway                                  | 0.00212  |
|             | Morphine addiction                                       | 0.00237  |
|             | Circadian entrainment                                    | 0.00237  |
|             | Oxytocin signaling pathway                               | 0.00237  |
|             | Vascular smooth muscle contraction                       | 0.00266  |
|             | Ubiquitin mediated proteolysis                           | 0.00312  |
|             | Lysine degradation                                       | 0.00312  |
|             | Ras signaling pathway                                    | 0.00312  |
|             | Axon guidance                                            | 0.00392  |
|             | Pancreatic cancer                                        | 0.00467  |
| <b>KIRC</b> | Prion diseases                                           | 1.98E-10 |
|             | Proteoglycans in cancer                                  | 7.53E-07 |
|             | Glioma                                                   | 2.30E-06 |
|             | ErbB signaling pathway                                   | 5.38E-06 |
|             | Ras signaling pathway                                    | 6.23E-05 |
|             | ECM-receptor interaction                                 | 0.00123  |
|             | Amphetamine addiction                                    | 0.00129  |
|             | Focal adhesion                                           | 0.00129  |
|             | TGF-beta signaling pathway                               | 0.00159  |
|             | Renal cell carcinoma                                     | 0.00159  |

|              |                                                          |          |
|--------------|----------------------------------------------------------|----------|
|              | Rap1 signaling pathway                                   | 0.00159  |
|              | Gap junction                                             | 0.00214  |
|              | Estrogen signaling pathway                               | 0.00214  |
|              | Long-term potentiation                                   | 0.00214  |
|              | PI3K-Akt signaling pathway                               | 0.00214  |
|              | Axon guidance                                            | 0.00236  |
|              | Lysine degradation                                       | 0.00248  |
|              | Phosphatidylinositol signaling system                    | 0.0027   |
|              | Dorso-ventral axis formation                             | 0.00276  |
|              | Choline metabolism in cancer                             | 0.00336  |
|              | Mucin type O-Glycan biosynthesis                         | 0.00381  |
|              | Signaling pathways regulating pluripotency of stem cells | 0.00442  |
| <b>KIRP</b>  | Fatty acid biosynthesis                                  | 1.27E-17 |
|              | Signaling pathways regulating pluripotency of stem cells | 1.67E-09 |
|              | Proteoglycans in cancer                                  | 1.21E-08 |
|              | Prolactin signaling pathway                              | 1.73E-06 |
|              | Hippo signaling pathway                                  | 1.81E-06 |
|              | Prostate cancer                                          | 0.00011  |
|              | FoxO signaling pathway                                   | 0.00013  |
|              | Rap1 signaling pathway                                   | 0.00017  |
|              | Melanoma                                                 | 0.00026  |
|              | Pathways in cancer                                       | 0.0003   |
|              | Long-term depression                                     | 0.00035  |
|              | PI3K-Akt signaling pathway                               | 0.00056  |
|              | Endometrial cancer                                       | 0.00066  |
|              | Glioma                                                   | 0.00066  |
|              | Thyroid cancer                                           | 0.00084  |
|              | Colorectal cancer                                        | 0.00092  |
|              | Estrogen signaling pathway                               | 0.00114  |
|              | TGF-beta signaling pathway                               | 0.00208  |
|              | Non-small cell lung cancer                               | 0.00227  |
|              | AMPK signaling pathway                                   | 0.00463  |
| <b>LIHCC</b> | Fatty acid biosynthesis                                  | 2.61E-12 |
|              | ECM-receptor interaction                                 | 1.63E-11 |
|              | Fatty acid metabolism                                    | 2.79E-11 |
|              | Hepatitis B                                              | 3.58E-09 |
|              | Glioma                                                   | 2.90E-08 |
|              | Proteoglycans in cancer                                  | 1.11E-07 |
|              | Lysine degradation                                       | 3.32E-07 |

|             |                                                            |          |
|-------------|------------------------------------------------------------|----------|
|             | Hippo signaling pathway                                    | 1.95E-06 |
|             | Pathways in cancer                                         | 4.2E-06  |
|             | Viral carcinogenesis                                       | 5.37E-06 |
|             | TGF-beta signaling pathway                                 | 9.14E-06 |
|             | Estrogen signaling pathway                                 | 1.7E-05  |
|             | Chronic myeloid leukemia                                   | 3.9E-05  |
|             | Prostate cancer                                            | 0.00011  |
|             | Renal cell carcinoma                                       | 0.00015  |
|             | Adherens junction                                          | 0.00076  |
|             | Fatty acid elongation                                      | 0.00081  |
|             | Prion diseases                                             | 0.00139  |
|             | Endocytosis                                                | 0.00141  |
| <hr/>       |                                                            |          |
| <b>LUAD</b> | Fatty acid biosynthesis                                    | 7.47E-10 |
|             | Axon guidance                                              | 9.10E-08 |
|             | Signaling pathways regulating pluripotency of stem cells   | 6.07E-06 |
|             | TGF-beta signaling pathway                                 | 9.26E-06 |
|             | Proteoglycans in cancer                                    | 9.26E-06 |
|             | Amphetamine addiction                                      | 4.99E-05 |
|             | Pathways in cancer                                         | 4.99E-05 |
|             | Hippo signaling pathway                                    | 9.75E-05 |
|             | Transcriptional misregulation in cancer                    | 9.75E-05 |
|             | Thyroid hormone signaling pathway                          | 0.00046  |
|             | Ubiquitin mediated proteolysis                             | 0.00053  |
|             | N-Glycan biosynthesis                                      | 0.00209  |
|             | Glycosphingolipid biosynthesis - ganglio series            | 0.00221  |
|             | Adherens junction                                          | 0.00221  |
|             | Circadian rhythm                                           | 0.0023   |
|             | Rap1 signaling pathway                                     | 0.0027   |
|             | Arrhythmogenic right ventricular cardiomyopathy (ARVC)     | 0.00389  |
| <hr/>       |                                                            |          |
| <b>LUSC</b> | Glycosphingolipid biosynthesis - lacto and neolacto series | 7.01E-13 |
|             | Prion diseases                                             | 1.70E-06 |
|             | Proteoglycans in cancer                                    | 2.28E-06 |
|             | TGF-beta signaling pathway                                 | 2.92E-06 |
|             | Mucin type O-Glycan biosynthesis                           | 1.35E-05 |
|             | Signaling pathways regulating pluripotency of stem cells   | 1.35E-05 |
|             | ErbB signaling pathway                                     | 2.03E-05 |
|             | mTOR signaling pathway                                     | 6.97E-05 |



|             |                                                          |          |
|-------------|----------------------------------------------------------|----------|
|             | FoxO signaling pathway                                   | 0.0009   |
| <b>READ</b> | GABAergic synapse                                        | 1.25E-06 |
|             | Thyroid hormone signaling pathway                        | 1.25E-06 |
|             | Estrogen signaling pathway                               | 1.25E-06 |
|             | Axon guidance                                            | 5.97E-05 |
|             | Proteoglycans in cancer                                  | 5.97E-05 |
|             | ErbB signaling pathway                                   | 0.00033  |
|             | Prolactin signaling pathway                              | 0.00033  |
|             | Renal cell carcinoma                                     | 0.00033  |
|             | Adrenergic signaling in cardiomyocytes                   | 0.00037  |
|             | Morphine addiction                                       | 0.0012   |
|             | Ras signaling pathway                                    | 0.00208  |
|             | Phosphatidylinositol signaling system                    | 0.0021   |
|             | Cocaine addiction                                        | 0.00238  |
|             | Pancreatic cancer                                        | 0.00238  |
|             | Signaling pathways regulating pluripotency of stem cells | 0.00238  |
|             | Mucin type O-Glycan biosynthesis                         | 0.0027   |
|             | Rap1 signaling pathway                                   | 0.00374  |
|             | Biotin metabolism                                        | 0.00421  |
|             | Long-term depression                                     | 0.00421  |
|             | Focal adhesion                                           | 0.00421  |
|             | Pathways in cancer                                       | 0.00421  |
|             | Neurotrophin signaling pathway                           | 0.00483  |
|             | Oxytocin signaling pathway                               | 0.00483  |
| <b>SKCM</b> | Fatty acid biosynthesis                                  | 6.12E-11 |
|             | Fatty acid metabolism                                    | 6.12E-11 |
|             | ECM-receptor interaction                                 | 6.12E-11 |
|             | Proteoglycans in cancer                                  | 1.53E-07 |
|             | Signaling pathways regulating pluripotency of stem cells | 1.3E-05  |
|             | FoxO signaling pathway                                   | 8.6E-05  |
|             | Glioma                                                   | 0.0001   |
|             | ErbB signaling pathway                                   | 0.00014  |
|             | Endometrial cancer                                       | 0.00014  |
|             | Hippo signaling pathway                                  | 0.00037  |
|             | Pathways in cancer                                       | 0.00041  |
|             | Focal adhesion                                           | 0.00052  |
|             | Thyroid hormone signaling pathway                        | 0.00075  |
|             | PI3K-Akt signaling pathway                               | 0.00075  |
|             | mTOR signaling pathway                                   | 0.00084  |

|             |                                                           |          |
|-------------|-----------------------------------------------------------|----------|
|             | Colorectal cancer                                         | 0.00086  |
|             | Long-term depression                                      | 0.00086  |
|             | Wnt signaling pathway                                     | 0.00086  |
|             | Melanoma                                                  | 0.00086  |
|             | Choline metabolism in cancer                              | 0.00123  |
|             | Arrhythmogenic right ventricular cardiomyopathy (ARVC)    | 0.00178  |
|             | Adrenergic signaling in cardiomyocytes                    | 0.00266  |
|             | TGF-beta signaling pathway                                | 0.0029   |
|             | Prostate cancer                                           | 0.00298  |
|             | Thyroid cancer                                            | 0.00373  |
|             | Neurotrophin signaling pathway                            | 0.00475  |
|             | Oxytocin signaling pathway                                | 0.00475  |
| <b>STAD</b> | ECM-receptor interaction                                  | 5.52E-10 |
|             | Renal cell carcinoma                                      | 6.37E-07 |
|             | Ras signaling pathway                                     | 7.78E-07 |
|             | Axon guidance                                             | 7.78E-07 |
|             | Pathways in cancer                                        | 8.76E-07 |
|             | Proteoglycans in cancer                                   | 3.33E-06 |
|             | Prion diseases                                            | 7.68E-06 |
|             | Adherens junction                                         | 7.68E-06 |
|             | Long-term depression                                      | 9.64E-06 |
|             | ErbB signaling pathway                                    | 9.64E-06 |
|             | Hippo signaling pathway                                   | 1.21E-05 |
|             | FoxO signaling pathway                                    | 1.67E-05 |
|             | TGF-beta signaling pathway                                | 1.76E-05 |
|             | Focal adhesion                                            | 1.76E-05 |
|             | Glioma                                                    | 5.42E-05 |
|             | Choline metabolism in cancer                              | 0.00019  |
|             | Chronic myeloid leukemia                                  | 0.00023  |
|             | Signaling pathways regulating pluripotency of stem cells  | 0.00023  |
|             | Prolactin signaling pathway                               | 0.00023  |
|             | Colorectal cancer                                         | 0.00028  |
|             | Mucin type O-Glycan biosynthesis                          | 0.00046  |
|             | Pancreatic cancer                                         | 0.00046  |
|             | Endocrine and other factor-regulated calcium reabsorption | 0.00049  |
|             | Melanoma                                                  | 0.00053  |
|             | PI3K-Akt signaling pathway                                | 0.0006   |
|             | Rap1 signaling pathway                                    | 0.00118  |

|             |                                                           |          |
|-------------|-----------------------------------------------------------|----------|
|             | Circadian rhythm                                          | 0.00174  |
|             | Thyroid hormone signaling pathway                         | 0.0022   |
|             | Regulation of actin cytoskeleton                          | 0.00398  |
|             | Prostate cancer                                           | 0.00398  |
|             | cGMP-PKG signaling pathway                                | 0.00497  |
| <b>THCA</b> | Prion diseases                                            | 1.49E-07 |
|             | Proteoglycans in cancer                                   | 1.48E-06 |
|             | Axon guidance                                             | 6.31E-06 |
|             | Glutamatergic synapse                                     | 6.63E-05 |
|             | Signaling pathways regulating pluripotency of stem cells  | 0.00016  |
|             | Long-term depression                                      | 0.0002   |
|             | Morphine addiction                                        | 0.0002   |
|             | ErbB signaling pathway                                    | 0.0002   |
|             | FoxO signaling pathway                                    | 0.00025  |
|             | TGF-beta signaling pathway                                | 0.00033  |
|             | Transcriptional misregulation in cancer                   | 0.00038  |
|             | Chronic myeloid leukemia                                  | 0.00099  |
|             | Ubiquitin mediated proteolysis                            | 0.00218  |
|             | Retrograde endocannabinoid signaling                      | 0.00242  |
|             | Renal cell carcinoma                                      | 0.0026   |
|             | cGMP-PKG signaling pathway                                | 0.00265  |
|             | Regulation of actin cytoskeleton                          | 0.00265  |
|             | Glioma                                                    | 0.00273  |
|             | Glycosaminoglycan biosynthesis - keratan sulfate          | 0.00433  |
| <b>UVM</b>  | Hippo signaling pathway                                   | 5.37E-12 |
|             | Signaling pathways regulating pluripotency of stem cells  | 9.55E-11 |
|             | Pathways in cancer                                        | 2.24E-07 |
|             | Ubiquitin mediated proteolysis                            | 3.48E-06 |
|             | Thyroid hormone signaling pathway                         | 3.48E-06 |
|             | Transcriptional misregulation in cancer                   | 3.48E-06 |
|             | Proteoglycans in cancer                                   | 3.48E-06 |
|             | Renal cell carcinoma                                      | 4.88E-06 |
|             | Wnt signaling pathway                                     | 1.03E-05 |
|             | Axon guidance                                             | 1.47E-05 |
|             | FoxO signaling pathway                                    | 1.58E-05 |
|             | Phosphatidylinositol signaling system                     | 4.56E-05 |
|             | Adherens junction                                         | 0.00012  |
|             | Endocrine and other factor-regulated calcium reabsorption | 0.00014  |

|                                             |         |
|---------------------------------------------|---------|
| Circadian rhythm                            | 0.00015 |
| TGF-beta signaling pathway                  | 0.0004  |
| Rap1 signaling pathway                      | 0.0004  |
| AMPK signaling pathway                      | 0.00071 |
| Long-term depression                        | 0.00103 |
| Ras signaling pathway                       | 0.00165 |
| Colorectal cancer                           | 0.00188 |
| mRNA surveillance pathway                   | 0.002   |
| Morphine addiction                          | 0.00202 |
| MAPK signaling pathway                      | 0.00304 |
| Sphingolipid signaling pathway              | 0.00331 |
| Cholinergic synapse                         | 0.00485 |
| Protein processing in endoplasmic reticulum | 0.00591 |

**Supplementary Table S22.** GO category analysis of miRNA signatures across 15 cancers

| <b>Cancer</b> | <b>GO Category</b>                                   | <b>genes</b> | <b>miRNAs</b> | <b>p-value</b> |
|---------------|------------------------------------------------------|--------------|---------------|----------------|
| <b>BLCA</b>   | cellular_component                                   | 3963         | 9             | 7.55E-19       |
|               | protein binding transcription factor activity        | 173          | 10            | 8.66E-18       |
|               | protein complex                                      | 1074         | 10            | 3.84E-17       |
|               | epidermal growth factor receptor signaling pathway   | 95           | 12            | 4.88E-17       |
|               | enzyme binding                                       | 457          | 12            | 5.25E-17       |
|               | molecular_function                                   | 5054         | 14            | 7.98E-17       |
|               | gene expression                                      | 217          | 14            | 2.00E-16       |
|               | Fc-epsilon receptor signaling pathway                | 91           | 15            | 2.60E-16       |
|               | nucleic acid binding transcription factor activity   | 379          | 16            | 5.40E-16       |
|               | neurotrophin TRK receptor signaling pathway          | 127          | 16            | 6.64E-16       |
|               | cellular protein modification process                | 927          | 19            | 8.01E-16       |
|               | biosynthetic process                                 | 1518         | 23            | 8.67E-16       |
|               | cellular nitrogen compound metabolic process         | 1839         | 23            | 9.21E-16       |
|               | ion binding                                          | 2413         | 23            | 9.50E-16       |
|               | organelle                                            | 3878         | 28            | 1.06E-15       |
|               | cytosol                                              | 790          | 11            | 1.67E-15       |
|               | nucleoplasm                                          | 336          | 9             | 1.37E-12       |
|               | transcription, DNA-templated                         | 458          | 7             | 1.07E-11       |
|               | cellular component assembly                          | 349          | 7             | 1.16E-09       |
|               | fibroblast growth factor receptor signaling pathway  | 71           | 9             | 1.02E-08       |
|               | symbiosis, encompassing mutualism through parasitism | 130          | 5             | 3.18E-08       |
|               | small molecule metabolic process                     | 541          | 8             | 9.61E-08       |
|               | biological_process                                   | 3279         | 7             | 9.70E-08       |

|             |                                                      |      |   |          |
|-------------|------------------------------------------------------|------|---|----------|
|             | viral process                                        | 119  | 5 | 1.29E-07 |
|             | catabolic process                                    | 335  | 4 | 2.13E-07 |
|             | cytoskeletal protein binding                         | 200  | 7 | 2.00E-06 |
|             | cell death                                           | 237  | 6 | 5.99E-06 |
|             | blood coagulation                                    | 118  | 5 | 7.45E-06 |
|             | phosphatidylinositol-mediated signaling              | 51   | 8 | 7.85E-06 |
|             | response to stress                                   | 433  | 6 | 3.51E-05 |
|             | mitotic cell cycle                                   | 69   | 3 | 7.20E-05 |
|             | macromolecular complex assembly                      | 217  | 6 | 0.00022  |
|             | synaptic transmission                                | 93   | 4 | 0.004    |
|             | toll-like receptor 10 signaling pathway              | 26   | 4 | 0.00438  |
|             | nucleobase-containing compound catabolic process     | 150  | 3 | 0.00486  |
| <b>BRCA</b> | mitotic cell cycle                                   | 87   | 5 | <1E-325  |
|             | cellular protein modification process                | 329  | 5 | <1E-325  |
|             | biological_process                                   | 1365 | 5 | <1E-325  |
|             | viral process                                        | 108  | 5 | <1E-325  |
|             | small molecule metabolic process                     | 287  | 5 | <1E-325  |
|             | symbiosis, encompassing mutualism through parasitism | 119  | 5 | <1E-325  |
|             | membrane organization                                | 113  | 5 | <1E-325  |
|             | biosynthetic process                                 | 528  | 6 | <1E-325  |
|             | gene expression                                      | 157  | 6 | <1E-325  |
|             | cellular nitrogen compound metabolic process         | 684  | 8 | <1E-326  |
|             | catabolic process                                    | 225  | 3 | 8.33E-15 |
|             | cellular component assembly                          | 190  | 7 | 5.48E-14 |
|             | response to stress                                   | 242  | 3 | 6.43E-14 |
|             | macromolecular complex assembly                      | 133  | 6 | 4.60E-12 |
|             | nucleobase-containing compound catabolic process     | 131  | 5 | 1.16E-11 |
|             | mRNA metabolic process                               | 52   | 4 | 1.37E-11 |
|             | RNA metabolic process                                | 54   | 4 | 5.92E-11 |
|             | neurotrophin TRK receptor signaling pathway          | 43   | 3 | 1.04E-10 |
|             | cellular protein metabolic process                   | 73   | 5 | 4.98E-09 |
|             | cellular lipid metabolic process                     | 30   | 3 | 3.64E-07 |
|             | Fc-epsilon receptor signaling pathway                | 29   | 4 | 4.47E-07 |
|             | protein complex assembly                             | 101  | 5 | 5.38E-07 |
|             | DNA metabolic process                                | 93   | 3 | 1.52E-05 |
|             | cell death                                           | 123  | 4 | 2.56E-05 |
|             | viral life cycle                                     | 24   | 4 | 5.19E-05 |
|             | transcription, DNA-templated                         | 119  | 2 | 0.00113  |
|             | epidermal growth factor receptor signaling pathway   | 25   | 2 | 0.00223  |

|             |                                                          |      |    |          |
|-------------|----------------------------------------------------------|------|----|----------|
|             | transcription initiation from RNA polymerase II promoter | 21   | 2  | 0.00406  |
|             | G2/M transition of mitotic cell cycle                    | 23   | 2  | 0.00438  |
| <b>COAD</b> | biological_process                                       | 3548 | 7  | 6.51E-22 |
|             | nucleoplasm                                              | 316  | 8  | 8.67E-22 |
|             | neurotrophin TRK receptor signaling pathway              | 83   | 8  | 3.40E-20 |
|             | nucleic acid binding transcription factor activity       | 317  | 9  | 8.46E-20 |
|             | cellular_component                                       | 3941 | 9  | 9.60E-20 |
|             | transcription, DNA-templated                             | 611  | 9  | 5.71E-18 |
|             | enzyme binding                                           | 401  | 9  | 9.21E-18 |
|             | protein binding transcription factor activity            | 180  | 10 | 2.57E-17 |
|             | molecular_function                                       | 4155 | 11 | 5.57E-17 |
|             | protein complex                                          | 1102 | 11 | 2.99E-16 |
|             | gene expression                                          | 219  | 12 | 4.78E-16 |
|             | cellular protein modification process                    | 766  | 13 | 5.09E-16 |
|             | biosynthetic process                                     | 1364 | 15 | 6.27E-16 |
|             | ion binding                                              | 1982 | 16 | 6.84E-16 |
|             | cellular nitrogen compound metabolic process             | 1696 | 18 | 8.43E-15 |
|             | organelle                                                | 3396 | 19 | 6.10E-14 |
|             | mitotic cell cycle                                       | 104  | 7  | 8.20E-14 |
|             | cellular component assembly                              | 244  | 5  | 3.71E-13 |
|             | cytosol                                                  | 538  | 5  | 2.85E-12 |
|             | Fc-epsilon receptor signaling pathway                    | 52   | 7  | 3.27E-12 |
|             | cytoskeletal protein binding                             | 218  | 8  | 5.12E-12 |
|             | catabolic process                                        | 492  | 9  | 6.00E-12 |
|             | macromolecular complex assembly                          | 196  | 7  | 2.70E-10 |
|             | blood coagulation                                        | 103  | 4  | 4.08E-09 |
|             | nucleobase-containing compound catabolic process         | 198  | 6  | 6.11E-09 |
|             | epidermal growth factor receptor signaling pathway       | 66   | 6  | 1.15E-08 |
|             | RNA binding                                              | 399  | 7  | 3.38E-08 |
|             | small molecule metabolic process                         | 430  | 6  | 3.94E-07 |
|             | symbiosis, encompassing mutualism through parasitism     | 130  | 5  | 2.19E-06 |
|             | viral process                                            | 113  | 5  | 4.88E-06 |
|             | protein complex assembly                                 | 133  | 5  | 3.17E-05 |
|             | synaptic transmission                                    | 89   | 4  | 0.0001   |
|             | fibroblast growth factor receptor signaling pathway      | 53   | 6  | 0.00025  |
|             | enzyme regulator activity                                | 169  | 4  | 0.00033  |
|             | cell death                                               | 174  | 4  | 0.00068  |
|             | regulation of transcription, DNA-templated               | 62   | 1  | 0.00069  |
|             | microtubule organizing center                            | 90   | 4  | 0.00104  |

|             |                                                     |      |    |          |
|-------------|-----------------------------------------------------|------|----|----------|
|             | response to stress                                  | 357  | 4  | 0.00317  |
|             | nucleic acid binding                                | 54   | 1  | 0.0032   |
|             | cell-cell signaling                                 | 103  | 3  | 0.00486  |
| <b>ESCA</b> | cellular_component                                  | 3045 | 7  | 2.89E-23 |
|             | molecular_function                                  | 3396 | 8  | 6.40E-22 |
|             | nucleic acid binding transcription factor activity  | 291  | 9  | 1.99E-20 |
|             | gene expression                                     | 159  | 9  | 4.53E-18 |
|             | neurotrophin TRK receptor signaling pathway         | 96   | 10 | 6.16E-18 |
|             | cellular protein modification process               | 676  | 11 | 9.60E-18 |
|             | biosynthetic process                                | 1067 | 12 | 5.57E-17 |
|             | ion binding                                         | 1681 | 12 | 5.69E-17 |
|             | cellular nitrogen compound metabolic process        | 1430 | 16 | 2.65E-16 |
|             | organelle                                           | 2841 | 16 | 3.32E-16 |
|             | transcription, DNA-templated                        | 375  | 5  | 5.55E-16 |
|             | enzyme binding                                      | 328  | 7  | 1.48E-14 |
|             | Fc-epsilon receptor signaling pathway               | 50   | 4  | 6.93E-12 |
|             | protein binding transcription factor activity       | 131  | 7  | 3.20E-08 |
|             | protein complex                                     | 600  | 4  | 3.97E-08 |
|             | epidermal growth factor receptor signaling pathway  | 65   | 4  | 5.19E-08 |
|             | biological_process                                  | 2825 | 6  | 4.89E-07 |
|             | nucleoplasm                                         | 270  | 6  | 4.94E-07 |
|             | catabolic process                                   | 275  | 4  | 1.30E-06 |
|             | blood coagulation                                   | 120  | 7  | 1.60E-06 |
|             | synaptic transmission                               | 107  | 6  | 1.65E-06 |
|             | cellular component assembly                         | 248  | 4  | 2.02E-05 |
|             | small molecule metabolic process                    | 299  | 4  | 3.66E-05 |
|             | cytosol                                             | 370  | 3  | 0.00036  |
|             | fibroblast growth factor receptor signaling pathway | 54   | 5  | 0.00097  |
|             | enzyme regulator activity                           | 120  | 2  | 0.00131  |
|             | post-translational protein modification             | 36   | 2  | 0.00211  |
|             | cell death                                          | 151  | 3  | 0.00271  |
|             | cytoskeletal protein binding                        | 156  | 4  | 0.00433  |
| <b>HNSC</b> | nucleic acid binding transcription factor activity  | 240  | 7  | 2.62E-23 |
|             | Fc-epsilon receptor signaling pathway               | 63   | 7  | 5.22E-23 |
|             | neurotrophin TRK receptor signaling pathway         | 91   | 8  | 5.36E-21 |
|             | gene expression                                     | 169  | 9  | 3.11E-18 |
|             | molecular_function                                  | 3534 | 10 | 4.07E-18 |
|             | cellular protein modification process               | 647  | 11 | 9.45E-19 |
|             | biosynthetic process                                | 983  | 11 | 3.62E-17 |
|             | ion binding                                         | 1559 | 12 | 1.93E-17 |

|                                                      |      |    |          |
|------------------------------------------------------|------|----|----------|
| organelle                                            | 2495 | 12 | 2.51E-16 |
| cellular nitrogen compound metabolic process         | 1231 | 13 | 1.80E-16 |
| cellular_component                                   | 3144 | 8  | 1.11E-16 |
| enzyme binding                                       | 322  | 8  | 1.11E-16 |
| protein complex                                      | 760  | 6  | 8.88E-16 |
| epidermal growth factor receptor signaling pathway   | 72   | 8  | 5.02E-14 |
| blood coagulation                                    | 134  | 8  | 2.18E-13 |
| cytosol                                              | 509  | 6  | 3.68E-12 |
| transcription, DNA-templated                         | 117  | 2  | 1.53E-11 |
| protein binding transcription factor activity        | 140  | 7  | 3.05E-11 |
| catabolic process                                    | 321  | 4  | 5.96E-09 |
| nucleoplasm                                          | 174  | 3  | 2.63E-08 |
| fibroblast growth factor receptor signaling pathway  | 59   | 6  | 1.02E-07 |
| symbiosis, encompassing mutualism through parasitism | 118  | 5  | 2.09E-07 |
| nucleobase-containing compound catabolic process     | 144  | 3  | 1.59E-06 |
| small molecule metabolic process                     | 264  | 4  | 2.91E-06 |
| viral process                                        | 106  | 5  | 3.21E-06 |
| cellular component assembly                          | 186  | 3  | 2.09E-05 |
| biological_process                                   | 1946 | 3  | 2.22E-05 |
| synaptic transmission                                | 87   | 5  | 2.38E-05 |
| platelet activation                                  | 50   | 4  | 0.00014  |
| phosphatidylinositol-mediated signaling              | 34   | 4  | 0.00045  |
| regulation of transcription, DNA-templated           | 62   | 1  | 0.00051  |
| cytoskeletal protein binding                         | 93   | 2  | 0.00122  |
| cellular protein metabolic process                   | 69   | 3  | 0.00323  |
| macromolecular complex assembly                      | 97   | 2  | 0.00348  |
| response to stress                                   | 180  | 3  | 0.00437  |
| nucleic acid binding                                 | 54   | 1  | 0.00449  |
| <b>KIRC</b> molecular_function                       | 2909 | 7  | 1.56E-24 |
| cellular_component                                   | 2662 | 7  | 2.69E-23 |
| nucleic acid binding transcription factor activity   | 231  | 8  | 1.48E-20 |
| cellular protein modification process                | 538  | 8  | 4.75E-20 |
| biosynthetic process                                 | 837  | 10 | 3.86E-19 |
| cellular nitrogen compound metabolic process         | 1028 | 11 | 2.96E-18 |
| ion binding                                          | 1328 | 11 | 4.00E-17 |
| organelle                                            | 2049 | 13 | 6.27E-18 |
| Fc-epsilon receptor signaling pathway                | 55   | 5  | 2.22E-16 |
| neurotrophin TRK receptor signaling pathway          | 68   | 5  | 4.44E-16 |
| epidermal growth factor receptor signaling pathway   | 65   | 5  | 2.44E-15 |
| gene expression                                      | 131  | 6  | 1.20E-12 |



|             |                                                                 |      |    |          |
|-------------|-----------------------------------------------------------------|------|----|----------|
|             | protein binding transcription factor activity                   | 115  | 6  | 2.74E-10 |
|             | protein complex                                                 | 500  | 4  | 1.12E-08 |
|             | enzyme binding                                                  | 212  | 5  | 1.59E-07 |
|             | catabolic process                                               | 179  | 3  | 2.16E-07 |
|             | synaptic transmission                                           | 80   | 4  | 4.43E-07 |
|             | nervous system development                                      | 23   | 2  | 5.09E-07 |
|             | transcription, DNA-templated                                    | 337  | 5  | 9.21E-07 |
|             | biological_process                                              | 2416 | 5  | 1.53E-06 |
|             | fibroblast growth factor receptor signaling pathway             | 53   | 5  | 3.33E-06 |
|             | cytosol                                                         | 380  | 4  | 4.32E-06 |
|             | homophilic cell adhesion via plasma membrane adhesion molecules | 19   | 2  | 3.18E-05 |
|             | cellular component assembly                                     | 163  | 3  | 8.19E-05 |
|             | axon guidance                                                   | 90   | 3  | 0.00013  |
|             | cell-cell signaling                                             | 115  | 4  | 0.00014  |
|             | blood coagulation                                               | 77   | 4  | 0.00026  |
|             | symbiosis, encompassing mutualism through parasitism            | 77   | 3  | 0.00032  |
|             | small molecule metabolic process                                | 303  | 4  | 0.00085  |
|             | nucleoplasm                                                     | 165  | 3  | 0.00129  |
|             | macromolecular complex assembly                                 | 129  | 4  | 0.00132  |
|             | viral process                                                   | 66   | 3  | 0.00178  |
|             | phosphatidylinositol-mediated signaling                         | 31   | 4  | 0.00209  |
|             | response to stress                                              | 235  | 2  | 0.00241  |
|             | cell death                                                      | 95   | 2  | 0.00849  |
|             | cell adhesion                                                   | 32   | 2  | 0.02661  |
|             | nucleobase-containing compound catabolic process                | 63   | 2  | 0.03911  |
|             | protein complex assembly                                        | 65   | 1  | 0.04679  |
|             | enzyme regulator activity                                       | 69   | 2  | 0.04702  |
| <b>KIRP</b> | molecular_function                                              | 2322 | 5  | 1.27E-20 |
|             | neurotrophin TRK receptor signaling pathway                     | 76   | 6  | 3.07E-20 |
|             | cellular protein modification process                           | 515  | 8  | 2.36E-19 |
|             | gene expression                                                 | 160  | 9  | 1.97E-18 |
|             | ion binding                                                     | 1357 | 9  | 3.88E-17 |
|             | biosynthetic process                                            | 934  | 10 | 4.81E-18 |
|             | cellular nitrogen compound metabolic process                    | 1137 | 10 | 4.44E-17 |
|             | organelle                                                       | 2205 | 10 | 1.52E-16 |
|             | nucleic acid binding transcription factor activity              | 189  | 5  | 2.66E-15 |
|             | protein complex                                                 | 634  | 5  | 1.09E-14 |
|             | cellular_component                                              | 2227 | 4  | 1.39E-14 |
|             | Fc-epsilon receptor signaling pathway                           | 45   | 5  | 5.80E-14 |

|              |                                                          |      |   |          |
|--------------|----------------------------------------------------------|------|---|----------|
|              | cytosol                                                  | 370  | 3 | 3.87E-12 |
|              | biological_process                                       | 1506 | 2 | 2.76E-11 |
|              | epidermal growth factor receptor signaling pathway       | 62   | 5 | 9.95E-11 |
|              | nucleoplasm                                              | 189  | 4 | 4.63E-10 |
|              | enzyme binding                                           | 192  | 3 | 1.16E-09 |
|              | symbiosis, encompassing mutualism through parasitism     | 86   | 3 | 2.12E-07 |
|              | catabolic process                                        | 306  | 5 | 3.35E-07 |
|              | blood coagulation                                        | 95   | 5 | 5.69E-07 |
|              | fibroblast growth factor receptor signaling pathway      | 51   | 4 | 2.18E-06 |
|              | RNA binding                                              | 273  | 4 | 6.25E-06 |
|              | viral process                                            | 75   | 3 | 7.37E-06 |
|              | cellular component assembly                              | 180  | 3 | 8.81E-06 |
|              | small molecule metabolic process                         | 379  | 5 | 1.28E-05 |
|              | protein binding transcription factor activity            | 75   | 3 | 1.48E-05 |
|              | macromolecular complex assembly                          | 144  | 4 | 2.13E-05 |
|              | transcription, DNA-templated                             | 191  | 2 | 2.34E-05 |
|              | mitotic cell cycle                                       | 68   | 4 | 0.00024  |
|              | membrane organization                                    | 92   | 4 | 0.00027  |
|              | response to stress                                       | 261  | 4 | 0.00029  |
|              | phosphatidylinositol-mediated signaling                  | 33   | 3 | 0.00034  |
|              | cytoskeletal protein binding                             | 98   | 3 | 0.0004   |
|              | protein complex assembly                                 | 97   | 3 | 0.00112  |
|              | nervous system development                               | 41   | 2 | 0.00189  |
|              | cell death                                               | 106  | 2 | 0.0022   |
| <b>LIHCC</b> | transcription, DNA-templated                             | 790  | 6 | 3.80E-25 |
|              | transcription initiation from RNA polymerase II promoter | 90   | 6 | 8.84E-25 |
|              | protein complex assembly                                 | 250  | 6 | 1.11E-24 |
|              | cytoskeletal protein binding                             | 249  | 6 | 1.36E-24 |
|              | enzyme regulator activity                                | 280  | 6 | 3.16E-24 |
|              | epidermal growth factor receptor signaling pathway       | 95   | 7 | 4.55E-24 |
|              | blood coagulation                                        | 178  | 7 | 1.55E-23 |
|              | fibroblast growth factor receptor signaling pathway      | 79   | 7 | 2.61E-23 |
|              | immune system process                                    | 463  | 8 | 4.94E-22 |
|              | DNA metabolic process                                    | 271  | 8 | 1.08E-21 |
|              | mRNA metabolic process                                   | 104  | 8 | 4.73E-21 |
|              | Fc-epsilon receptor signaling pathway                    | 79   | 8 | 7.67E-21 |
|              | mitotic cell cycle                                       | 214  | 9 | 8.60E-21 |
|              | nucleic acid binding transcription factor activity       | 373  | 9 | 2.00E-20 |
|              | cell death                                               | 374  | 9 | 2.64E-20 |

|                                                            |      |    |          |
|------------------------------------------------------------|------|----|----------|
| RNA metabolic process                                      | 113  | 9  | 4.37E-20 |
| membrane organization                                      | 256  | 9  | 7.83E-20 |
| protein binding transcription factor activity              | 229  | 10 | 9.93E-20 |
| cellular component assembly                                | 462  | 10 | 1.09E-19 |
| cellular protein metabolic process                         | 214  | 10 | 1.43E-19 |
| neurotrophin TRK receptor signaling pathway                | 136  | 10 | 2.49E-19 |
| response to stress                                         | 780  | 11 | 3.92E-19 |
| nucleobase-containing compound catabolic process           | 368  | 11 | 7.90E-19 |
| small molecule metabolic process                           | 842  | 11 | 1.49E-18 |
| macromolecular complex assembly                            | 335  | 11 | 1.84E-18 |
| catabolic process                                          | 755  | 12 | 2.38E-18 |
| ion binding                                                | 2071 | 12 | 2.77E-18 |
| biological_process                                         | 4973 | 13 | 4.40E-18 |
| molecular_function                                         | 5196 | 14 | 5.51E-18 |
| cellular_component                                         | 5145 | 14 | 1.01E-17 |
| nucleoplasm                                                | 565  | 14 | 1.41E-17 |
| cellular protein modification process                      | 970  | 14 | 2.17E-17 |
| protein complex                                            | 1429 | 14 | 3.83E-17 |
| cytosol                                                    | 1124 | 15 | 3.92E-17 |
| biosynthetic process                                       | 1584 | 15 | 5.95E-17 |
| viral process                                              | 284  | 15 | 6.04E-17 |
| enzyme binding                                             | 572  | 15 | 1.98E-16 |
| poly(A) RNA binding                                        | 634  | 15 | 2.17E-16 |
| RNA binding                                                | 778  | 16 | 2.67E-16 |
| gene expression                                            | 354  | 16 | 2.86E-16 |
| symbiosis, encompassing mutualism through parasitism       | 317  | 16 | 3.13E-16 |
| cellular nitrogen compound metabolic process               | 1942 | 17 | 3.53E-16 |
| organelle                                                  | 3811 | 19 | 7.66E-16 |
| transforming growth factor beta receptor signaling pathway | 82   | 5  | 1.25E-15 |
| platelet activation                                        | 74   | 6  | 3.14E-13 |
| TRIF-dependent toll-like receptor signaling pathway        | 40   | 6  | 6.62E-13 |
| post-translational protein modification                    | 74   | 6  | 2.35E-12 |
| microtubule organizing center                              | 174  | 6  | 6.78E-12 |
| mRNA processing                                            | 185  | 7  | 2.16E-11 |
| MyD88-independent toll-like receptor signaling pathway     | 41   | 6  | 4.87E-11 |
| phosphatidylinositol-mediated signaling                    | 51   | 5  | 8.88E-11 |
| toll-like receptor 10 signaling pathway                    | 33   | 6  | 1.94E-10 |
| platelet degranulation                                     | 34   | 5  | 2.97E-10 |

|                                                                                                              |     |   |          |
|--------------------------------------------------------------------------------------------------------------|-----|---|----------|
| innate immune response                                                                                       | 202 | 5 | 3.21E-10 |
| Fc-gamma receptor signaling pathway involved in phagocytosis                                                 | 38  | 5 | 3.80E-10 |
| small conjugating protein binding                                                                            | 42  | 4 | 4.73E-10 |
| toll-like receptor TLR1:TLR2 signaling pathway                                                               | 33  | 5 | 5.38E-10 |
| toll-like receptor TLR6:TLR2 signaling pathway                                                               | 33  | 5 | 5.38E-10 |
| intrinsic apoptotic signaling pathway                                                                        | 34  | 6 | 6.79E-10 |
| toll-like receptor 3 signaling pathway                                                                       | 43  | 6 | 8.38E-10 |
| transcription from RNA polymerase II promoter                                                                | 211 | 7 | 3.45E-09 |
| mitotic nuclear envelope disassembly                                                                         | 26  | 5 | 7.33E-09 |
| RNA splicing                                                                                                 | 116 | 6 | 9.93E-09 |
| transcription factor binding                                                                                 | 169 | 4 | 1.03E-08 |
| G2/M transition of mitotic cell cycle                                                                        | 69  | 6 | 1.05E-08 |
| toll-like receptor 5 signaling pathway                                                                       | 32  | 5 | 1.70E-08 |
| toll-like receptor 9 signaling pathway                                                                       | 34  | 5 | 2.39E-08 |
| cellular component disassembly involved in execution phase of apoptosis                                      | 28  | 6 | 7.29E-08 |
| ribonucleoprotein complex assembly                                                                           | 53  | 4 | 1.10E-07 |
| nucleocytoplasmic transport                                                                                  | 109 | 5 | 1.15E-07 |
| cell cycle                                                                                                   | 233 | 5 | 2.55E-07 |
| toll-like receptor 4 signaling pathway                                                                       | 45  | 6 | 2.68E-07 |
| hexose transport                                                                                             | 24  | 6 | 2.82E-07 |
| activation of signaling protein activity involved in unfolded protein response                               | 39  | 5 | 4.60E-07 |
| stress-activated MAPK cascade                                                                                | 25  | 4 | 6.84E-07 |
| toll-like receptor signaling pathway                                                                         | 45  | 5 | 6.86E-07 |
| protein N-linked glycosylation via asparagine                                                                | 45  | 6 | 7.95E-07 |
| viral life cycle                                                                                             | 46  | 5 | 2.30E-06 |
| nuclear-transcribed mRNA catabolic process, deadenylation-dependent decay                                    | 25  | 6 | 2.45E-06 |
| insulin receptor signaling pathway                                                                           | 56  | 3 | 3.18E-06 |
| toll-like receptor 2 signaling pathway                                                                       | 34  | 5 | 4.63E-06 |
| regulation of transcription from RNA polymerase II promoter in response to hypoxia                           | 18  | 6 | 4.83E-06 |
| positive regulation of protein insertion into mitochondrial membrane involved in apoptotic signaling pathway | 18  | 6 | 7.79E-06 |
| cellular lipid metabolic process                                                                             | 54  | 4 | 1.01E-05 |
| cellular component movement                                                                                  | 44  | 4 | 1.34E-05 |
| regulation of glucose transport                                                                              | 21  | 5 | 2.61E-05 |
| cell junction organization                                                                                   | 47  | 4 | 3.38E-05 |
| G1/S transition of mitotic cell cycle                                                                        | 66  | 6 | 4.33E-05 |

|             |                                                                                               |      |    |          |
|-------------|-----------------------------------------------------------------------------------------------|------|----|----------|
|             | vesicle-mediated transport                                                                    | 269  | 4  | 4.58E-05 |
|             | in utero embryonic development                                                                | 124  | 6  | 7.73E-05 |
|             | mRNA splicing, via spliceosome                                                                | 55   | 2  | 0.00011  |
|             | protein targeting                                                                             | 51   | 1  | 0.00016  |
|             | focal adhesion                                                                                | 144  | 4  | 0.00019  |
|             | cell cycle arrest                                                                             | 59   | 4  | 0.00029  |
|             | chromatin organization                                                                        | 55   | 5  | 0.00037  |
|             | cellular response to hypoxia                                                                  | 45   | 3  | 0.0005   |
|             | cytoskeleton organization                                                                     | 144  | 2  | 0.00071  |
|             | termination of RNA polymerase II transcription                                                | 24   | 3  | 0.0015   |
|             | apoptotic signaling pathway                                                                   | 40   | 2  | 0.00176  |
|             | transcription coactivator activity                                                            | 104  | 4  | 0.00231  |
|             | axon guidance                                                                                 | 96   | 2  | 0.00238  |
|             | DNA damage response, signal transduction by p53 class mediator resulting in cell cycle arrest | 30   | 4  | 0.00253  |
|             | extracellular matrix disassembly                                                              | 31   | 4  | 0.00287  |
|             | positive regulation of apoptotic process                                                      | 102  | 3  | 0.00463  |
| <b>LUAD</b> | cellular_component                                                                            | 3483 | 8  | 1.37E-22 |
|             | protein binding transcription factor activity                                                 | 155  | 9  | 2.35E-20 |
|             | molecular_function                                                                            | 3472 | 9  | 6.03E-19 |
|             | nucleic acid binding transcription factor activity                                            | 282  | 10 | 7.41E-19 |
|             | gene expression                                                                               | 207  | 13 | 7.44E-19 |
|             | cellular protein modification process                                                         | 843  | 18 | 7.91E-19 |
|             | cellular nitrogen compound metabolic process                                                  | 1610 | 21 | 2.76E-18 |
|             | biosynthetic process                                                                          | 1384 | 22 | 3.02E-18 |
|             | ion binding                                                                                   | 2139 | 22 | 5.44E-18 |
|             | organelle                                                                                     | 3447 | 24 | 1.25E-17 |
|             | blood coagulation                                                                             | 139  | 8  | 7.77E-16 |
|             | neurotrophin TRK receptor signaling pathway                                                   | 87   | 8  | 1.11E-15 |
|             | protein complex                                                                               | 759  | 6  | 1.33E-15 |
|             | enzyme binding                                                                                | 327  | 8  | 4.05E-13 |
|             | Fc-epsilon receptor signaling pathway                                                         | 59   | 8  | 7.57E-11 |
|             | transcription, DNA-templated                                                                  | 444  | 6  | 8.43E-11 |
|             | cellular component assembly                                                                   | 260  | 5  | 4.16E-10 |
|             | nucleoplasm                                                                                   | 252  | 7  | 3.74E-09 |
|             | cytosol                                                                                       | 494  | 5  | 4.75E-08 |
|             | symbiosis, encompassing mutualism through parasitism                                          | 143  | 7  | 5.81E-08 |
|             | viral process                                                                                 | 130  | 7  | 6.02E-07 |
|             | cytoskeletal protein binding                                                                  | 154  | 5  | 1.04E-06 |
|             | small molecule metabolic process                                                              | 456  | 6  | 1.42E-05 |

|             |                                                     |      |    |          |
|-------------|-----------------------------------------------------|------|----|----------|
|             | biological_process                                  | 2374 | 5  | 6.28E-05 |
|             | catabolic process                                   | 339  | 5  | 0.00012  |
|             | macromolecular complex assembly                     | 153  | 4  | 0.00015  |
|             | epidermal growth factor receptor signaling pathway  | 48   | 4  | 0.00251  |
|             | nucleobase-containing compound catabolic process    | 122  | 3  | 0.00352  |
| <b>LUSC</b> | molecular_function                                  | 3331 | 9  | 2.69E-19 |
|             | cellular protein modification process               | 600  | 9  | 9.83E-19 |
|             | biosynthetic process                                | 949  | 11 | 2.34E-18 |
|             | cellular nitrogen compound metabolic process        | 1159 | 12 | 4.31E-16 |
|             | organelle                                           | 2294 | 12 | 5.61E-16 |
|             | ion binding                                         | 1451 | 13 | 6.67E-16 |
|             | cellular_component                                  | 2483 | 5  | 2.77E-13 |
|             | gene expression                                     | 138  | 8  | 3.51E-12 |
|             | nucleic acid binding transcription factor activity  | 185  | 6  | 1.42E-11 |
|             | neurotrophin TRK receptor signaling pathway         | 67   | 6  | 1.51E-11 |
|             | small molecule metabolic process                    | 431  | 5  | 1.19E-10 |
|             | protein binding transcription factor activity       | 67   | 4  | 9.02E-10 |
|             | protein complex                                     | 664  | 5  | 1.90E-09 |
|             | cytosol                                             | 392  | 5  | 1.61E-08 |
|             | Fc-epsilon receptor signaling pathway               | 44   | 6  | 2.15E-08 |
|             | catabolic process                                   | 309  | 4  | 1.15E-06 |
|             | biological_process                                  | 2448 | 4  | 1.69E-06 |
|             | epidermal growth factor receptor signaling pathway  | 50   | 5  | 5.67E-06 |
|             | enzyme binding                                      | 267  | 6  | 1.84E-05 |
|             | nucleoplasm                                         | 98   | 4  | 2.65E-05 |
|             | cytoskeletal protein binding                        | 145  | 3  | 8.45E-05 |
|             | response to stress                                  | 191  | 4  | 9.22E-05 |
|             | blood coagulation                                   | 68   | 3  | 0.00034  |
|             | transcription, DNA-templated                        | 325  | 4  | 0.00058  |
|             | phosphatidylinositol-mediated signaling             | 45   | 6  | 0.00064  |
|             | cellular component assembly                         | 184  | 3  | 0.00147  |
|             | fibroblast growth factor receptor signaling pathway | 43   | 4  | 0.00249  |
|             | synaptic transmission                               | 67   | 3  | 0.00924  |
| <b>READ</b> | molecular_function                                  | 2659 | 4  | 1.34E-19 |
|             | nucleic acid binding transcription factor activity  | 235  | 6  | 8.73E-19 |
|             | cellular protein modification process               | 558  | 6  | 2.26E-18 |
|             | biosynthetic process                                | 796  | 6  | 3.06E-18 |
|             | ion binding                                         | 1332 | 8  | 2.05E-16 |
|             | cellular nitrogen compound metabolic process        | 1039 | 9  | 2.28E-16 |
|             | organelle                                           | 2166 | 10 | 2.55E-16 |

|                                                          |      |    |          |
|----------------------------------------------------------|------|----|----------|
| cellular_component                                       | 2658 | 4  | 2.20E-14 |
| neurotrophin TRK receptor signaling pathway              | 61   | 3  | 1.18E-13 |
| Fc-epsilon receptor signaling pathway                    | 44   | 3  | 1.11E-12 |
| gene expression                                          | 120  | 5  | 4.28E-12 |
| protein binding transcription factor activity            | 98   | 4  | 7.91E-12 |
| cytoskeletal protein binding                             | 163  | 3  | 3.50E-11 |
| enzyme binding                                           | 252  | 4  | 7.67E-11 |
| transcription, DNA-templated                             | 216  | 3  | 1.17E-10 |
| blood coagulation                                        | 93   | 3  | 4.57E-10 |
| protein complex                                          | 592  | 3  | 1.68E-09 |
| nucleoplasm                                              | 181  | 4  | 8.03E-09 |
| cellular component assembly                              | 235  | 3  | 1.23E-08 |
| biological_process                                       | 2416 | 3  | 1.07E-07 |
| cytosol                                                  | 440  | 3  | 2.70E-07 |
| enzyme regulator activity                                | 124  | 2  | 3.35E-07 |
| epidermal growth factor receptor signaling pathway       | 48   | 3  | 3.44E-06 |
| macromolecular complex assembly                          | 74   | 1  | 2.32E-05 |
| transcription initiation from RNA polymerase II promoter | 45   | 3  | 5.12E-05 |
| cell-cell signaling                                      | 79   | 2  | 0.00017  |
| synaptic transmission                                    | 47   | 1  | 0.00018  |
| protein complex assembly                                 | 66   | 1  | 0.00028  |
| cell death                                               | 130  | 3  | 0.00061  |
| symbiosis, encompassing mutualism through parasitism     | 61   | 2  | 0.00069  |
| viral process                                            | 54   | 2  | 0.00094  |
| platelet activation                                      | 38   | 3  | 0.00416  |
| <b>SKCM</b> cellular_component                           | 4014 | 9  | 1.04E-20 |
| neurotrophin TRK receptor signaling pathway              | 101  | 9  | 3.68E-19 |
| nucleic acid binding transcription factor activity       | 337  | 10 | 4.66E-19 |
| gene expression                                          | 182  | 10 | 4.82E-19 |
| Fc-epsilon receptor signaling pathway                    | 85   | 10 | 9.75E-19 |
| molecular_function                                       | 4772 | 13 | 2.00E-18 |
| cellular protein modification process                    | 833  | 14 | 3.73E-18 |
| biosynthetic process                                     | 1384 | 15 | 5.97E-18 |
| ion binding                                              | 2201 | 18 | 1.48E-16 |
| organelle                                                | 3503 | 18 | 2.01E-16 |
| cellular nitrogen compound metabolic process             | 1762 | 19 | 2.34E-16 |
| protein complex                                          | 985  | 8  | 5.55E-16 |
| enzyme binding                                           | 399  | 11 | 1.12E-12 |
| small molecule metabolic process                         | 527  | 6  | 1.19E-10 |

|                                                      |                                                    |      |          |          |
|------------------------------------------------------|----------------------------------------------------|------|----------|----------|
| protein binding transcription factor activity        | 152                                                | 8    | 3.48E-10 |          |
| catabolic process                                    | 427                                                | 6    | 1.65E-09 |          |
| biological_process                                   | 3565                                               | 8    | 1.07E-08 |          |
| nucleoplasm                                          | 252                                                | 7    | 1.41E-08 |          |
| cytosol                                              | 420                                                | 4    | 3.16E-08 |          |
| cellular component assembly                          | 334                                                | 7    | 3.17E-08 |          |
| cytoskeletal protein binding                         | 221                                                | 8    | 1.84E-07 |          |
| symbiosis, encompassing mutualism through parasitism | 108                                                | 5    | 8.55E-07 |          |
| epidermal growth factor receptor signaling pathway   | 71                                                 | 7    | 8.67E-07 |          |
| transcription, DNA-templated                         | 461                                                | 5    | 2.06E-06 |          |
| extracellular matrix disassembly                     | 26                                                 | 1    | 2.39E-06 |          |
| phosphatidylinositol-mediated signaling              | 51                                                 | 6    | 2.37E-05 |          |
| viral process                                        | 84                                                 | 4    | 2.55E-05 |          |
| fibroblast growth factor receptor signaling pathway  | 61                                                 | 5    | 3.16E-05 |          |
| extracellular matrix organization                    | 44                                                 | 1    | 6.51E-05 |          |
| endoplasmic reticulum lumen                          | 33                                                 | 1    | 7.25E-05 |          |
| collagen catabolic process                           | 23                                                 | 1    | 0.00026  |          |
| membrane organization                                | 147                                                | 6    | 0.00095  |          |
| synaptic transmission                                | 90                                                 | 4    | 0.0011   |          |
| <hr/>                                                |                                                    |      |          |          |
| <b>STAD</b>                                          | cytosol                                            | 676  | 8        | 2.11E-26 |
|                                                      | enzyme binding                                     | 385  | 9        | 2.80E-23 |
|                                                      | cellular_component                                 | 4268 | 10       | 4.13E-23 |
|                                                      | nucleoplasm                                        | 368  | 10       | 4.41E-21 |
|                                                      | epidermal growth factor receptor signaling pathway | 89   | 10       | 1.02E-19 |
|                                                      | protein binding transcription factor activity      | 171  | 11       | 1.11E-19 |
|                                                      | neurotrophin TRK receptor signaling pathway        | 122  | 11       | 1.19E-19 |
|                                                      | gene expression                                    | 217  | 12       | 1.33E-19 |
|                                                      | Fc-epsilon receptor signaling pathway              | 85   | 12       | 3.10E-19 |
|                                                      | nucleic acid binding transcription factor activity | 393  | 13       | 7.03E-19 |
|                                                      | protein complex                                    | 1112 | 13       | 9.97E-19 |
|                                                      | molecular_function                                 | 4963 | 14       | 1.16E-18 |
|                                                      | biosynthetic process                               | 1375 | 16       | 3.33E-18 |
|                                                      | ion binding                                        | 2170 | 17       | 1.27E-17 |
|                                                      | cellular protein modification process              | 893  | 18       | 1.02E-16 |
|                                                      | cellular nitrogen compound metabolic process       | 1760 | 19       | 1.18E-16 |
|                                                      | organelle                                          | 3520 | 19       | 1.29E-16 |
|                                                      | blood coagulation                                  | 162  | 10       | 2.22E-16 |
|                                                      | biological_process                                 | 3373 | 7        | 1.28E-14 |
|                                                      | cellular component assembly                        | 360  | 8        | 1.52E-14 |
|                                                      | transcription, DNA-templated                       | 514  | 6        | 5.91E-12 |



|             |                                                              |      |    |          |
|-------------|--------------------------------------------------------------|------|----|----------|
|             | catabolic process                                            | 423  | 6  | 2.01E-11 |
|             | mitotic cell cycle                                           | 85   | 4  | 6.28E-10 |
|             | cell death                                                   | 210  | 5  | 1.79E-09 |
|             | symbiosis, encompassing mutualism through parasitism         | 138  | 6  | 4.82E-09 |
|             | RNA binding                                                  | 257  | 4  | 1.94E-08 |
|             | fibroblast growth factor receptor signaling pathway          | 67   | 7  | 4.43E-08 |
|             | macromolecular complex assembly                              | 210  | 6  | 8.05E-08 |
|             | viral process                                                | 124  | 6  | 1.06E-07 |
|             | response to stress                                           | 323  | 3  | 2.91E-06 |
|             | small molecule metabolic process                             | 477  | 6  | 8.06E-06 |
|             | nervous system development                                   | 58   | 4  | 2.37E-05 |
|             | cytoskeletal protein binding                                 | 114  | 3  | 2.99E-05 |
|             | phosphatidylinositol-mediated signaling                      | 42   | 6  | 3.37E-05 |
|             | synaptic transmission                                        | 72   | 3  | 5.96E-05 |
|             | transcription initiation from RNA polymerase II promoter     | 68   | 7  | 6.46E-05 |
|             | nucleobase-containing compound catabolic process             | 177  | 4  | 9.00E-05 |
|             | cell-cell signaling                                          | 123  | 4  | 0.00011  |
|             | protein complex assembly                                     | 183  | 6  | 0.00018  |
|             | enzyme regulator activity                                    | 178  | 5  | 0.00032  |
|             | post-translational protein modification                      | 28   | 2  | 0.00085  |
|             | axon guidance                                                | 83   | 3  | 0.00425  |
|             | Fc-gamma receptor signaling pathway involved in phagocytosis | 22   | 3  | 0.00997  |
| <b>THCA</b> | transcription, DNA-templated                                 | 305  | 6  | 5.65E-27 |
|             | enzyme binding                                               | 317  | 6  | 2.95E-24 |
|             | nucleic acid binding transcription factor activity           | 266  | 8  | 3.09E-24 |
|             | protein binding transcription factor activity                | 153  | 9  | 1.51E-23 |
|             | cellular_component                                           | 3623 | 11 | 2.11E-22 |
|             | molecular_function                                           | 3655 | 12 | 4.36E-21 |
|             | cellular protein modification process                        | 651  | 12 | 1.75E-20 |
|             | gene expression                                              | 163  | 13 | 8.06E-20 |
|             | cellular nitrogen compound metabolic process                 | 1380 | 18 | 5.87E-19 |
|             | biosynthetic process                                         | 1188 | 19 | 6.24E-19 |
|             | ion binding                                                  | 1767 | 19 | 7.03E-19 |
|             | organelle                                                    | 2787 | 19 | 2.12E-18 |
|             | Fc-epsilon receptor signaling pathway                        | 61   | 6  | 1.11E-16 |
|             | neurotrophin TRK receptor signaling pathway                  | 80   | 7  | 2.22E-16 |
|             | protein complex                                              | 658  | 4  | 4.14E-10 |
|             | blood coagulation                                            | 115  | 5  | 2.73E-09 |

|            |                                                          |      |   |          |
|------------|----------------------------------------------------------|------|---|----------|
|            | cytosol                                                  | 470  | 5 | 4.08E-09 |
|            | nucleoplasm                                              | 175  | 5 | 1.42E-08 |
|            | epidermal growth factor receptor signaling pathway       | 71   | 8 | 2.18E-08 |
|            | biological_process                                       | 2523 | 5 | 2.78E-08 |
|            | cellular component assembly                              | 278  | 6 | 1.54E-06 |
|            | catabolic process                                        | 375  | 5 | 3.80E-05 |
|            | transcription initiation from RNA polymerase II promoter | 43   | 4 | 0.00029  |
|            | phosphatidylinositol-mediated signaling                  | 41   | 5 | 0.00042  |
|            | regulation of transcription, DNA-templated               | 86   | 2 | 0.00044  |
|            | response to stress                                       | 315  | 4 | 0.00047  |
|            | viral process                                            | 86   | 3 | 0.00057  |
|            | post-translational protein modification                  | 41   | 4 | 0.00064  |
|            | cytoskeletal protein binding                             | 140  | 3 | 0.00113  |
|            | small molecule metabolic process                         | 318  | 4 | 0.00155  |
|            | symbiosis, encompassing mutualism through parasitism     | 91   | 3 | 0.00236  |
|            | macromolecular complex assembly                          | 163  | 5 | 0.0028   |
| <b>UVM</b> | molecular_function                                       | 3842 | 3 | 4.49E-24 |
|            | cellular_component                                       | 3650 | 3 | 3.88E-21 |
|            | enzyme binding                                           | 364  | 3 | 1.34E-20 |
|            | protein binding transcription factor activity            | 175  | 4 | 1.94E-20 |
|            | nucleic acid binding transcription factor activity       | 338  | 4 | 5.56E-20 |
|            | nucleoplasm                                              | 390  | 4 | 1.20E-19 |
|            | Fc-epsilon receptor signaling pathway                    | 67   | 4 | 5.73E-19 |
|            | protein complex                                          | 957  | 4 | 5.90E-19 |
|            | neurotrophin TRK receptor signaling pathway              | 100  | 4 | 8.05E-19 |
|            | transcription, DNA-templated                             | 686  | 5 | 9.47E-19 |
|            | biosynthetic process                                     | 1236 | 6 | 3.20E-17 |
|            | gene expression                                          | 217  | 6 | 4.06E-17 |
|            | cellular protein modification process                    | 766  | 7 | 7.19E-17 |
|            | ion binding                                              | 1750 | 7 | 1.60E-16 |
|            | cellular nitrogen compound metabolic process             | 1533 | 8 | 1.63E-15 |
|            | organelle                                                | 2867 | 8 | 1.65E-15 |
|            | epidermal growth factor receptor signaling pathway       | 79   | 3 | 1.96E-13 |
|            | biological_process                                       | 3261 | 1 | 1.61E-12 |
|            | cellular component assembly                              | 324  | 2 | 2.10E-11 |
|            | small molecule metabolic process                         | 537  | 3 | 6.44E-11 |
|            | viral process                                            | 118  | 1 | 7.00E-11 |
|            | symbiosis, encompassing mutualism through parasitism     | 130  | 1 | 7.84E-11 |

|                                                          |     |   |          |
|----------------------------------------------------------|-----|---|----------|
| response to stress                                       | 526 | 3 | 1.23E-10 |
| RNA binding                                              | 441 | 2 | 4.39E-10 |
| catabolic process                                        | 446 | 3 | 1.04E-09 |
| blood coagulation                                        | 133 | 4 | 6.46E-08 |
| cytosol                                                  | 557 | 1 | 8.22E-08 |
| TRIF-dependent toll-like receptor signaling pathway      | 30  | 4 | 3.70E-07 |
| phosphatidylinositol-mediated signaling                  | 53  | 3 | 4.40E-07 |
| MyD88-independent toll-like receptor signaling pathway   | 31  | 4 | 2.33E-06 |
| mitotic cell cycle                                       | 92  | 1 | 2.71E-06 |
| nervous system development                               | 121 | 3 | 1.36E-05 |
| post-translational protein modification                  | 51  | 1 | 1.79E-05 |
| cell death                                               | 211 | 2 | 2.14E-05 |
| fibroblast growth factor receptor signaling pathway      | 58  | 2 | 2.45E-05 |
| cytoskeletal protein binding                             | 197 | 3 | 3.89E-05 |
| macromolecular complex assembly                          | 198 | 2 | 4.27E-05 |
| nucleobase-containing compound catabolic process         | 186 | 1 | 0.00011  |
| transcription initiation from RNA polymerase II promoter | 67  | 2 | 0.00013  |
| toll-like receptor 3 signaling pathway                   | 30  | 4 | 0.00015  |
| toll-like receptor 10 signaling pathway                  | 25  | 3 | 0.00019  |
| toll-like receptor 4 signaling pathway                   | 34  | 3 | 0.00034  |
| cellular protein metabolic process                       | 100 | 1 | 0.00034  |
| positive regulation of transcription, DNA-templated      | 243 | 2 | 0.00055  |
| toll-like receptor TLR1:TLR2 signaling pathway           | 25  | 3 | 0.00059  |
| toll-like receptor TLR6:TLR2 signaling pathway           | 25  | 3 | 0.00059  |
| transcription from RNA polymerase II promoter            | 172 | 2 | 0.001    |
| toll-like receptor 9 signaling pathway                   | 27  | 3 | 0.00183  |
| toll-like receptor 5 signaling pathway                   | 25  | 3 | 0.00186  |
| DNA metabolic process                                    | 167 | 1 | 0.00282  |
| membrane organization                                    | 127 | 1 | 0.005    |

---

## Supplementary References

1. Veerla, S, Lindgren, D, Kvist, A, Frigyesi, A, Staaf, J, Persson, H, *et al.* (2009). MiRNA expression in urothelial carcinomas: important roles of miR-10a, miR-222, miR-125b, miR-7 and miR-452 for tumor stage and metastasis, and frequent homozygous losses of miR-31. *Int J Cancer* **124**: 2236-2242.
2. Browne, BM, Stensland, KD, Patel, CK, Sullivan, T, Burks, EJ, Canes, D, *et al.* (2019). MicroRNA Expression Profiles in Upper Tract Urothelial Carcinoma Differentiate Tumor Grade, Stage, and Survival: Implications for Clinical Decision-Making. *Urology* **123**: 93-100.
3. Ratert, N, Meyer, HA, Jung, M, Mollenkopf, HJ, Wagner, I, Miller, K, *et al.* (2012). Reference miRNAs for miRNAome analysis of urothelial carcinomas. *PLoS One* **7**: e39309.
4. Lin, S-R, Yeh, H-C, Wang, W-J, Ke, H-L, Lin, H-H, Hsu, W-C, *et al.* (2017). MiR-193b Mediates CEBPD-Induced Cisplatin Sensitization Through Targeting ETS1 and Cyclin D1 in Human Urothelial Carcinoma Cells. *Journal of Cellular Biochemistry* **118**: 1563-1573.
5. Blick, C, Ramachandran, A, McCormick, R, Wigfield, S, Cranston, D, Catto, J, *et al.* (2015). Identification of a hypoxia-regulated miRNA signature in bladder cancer and a role for miR-145 in hypoxia-dependent apoptosis. *British journal of cancer* **113**: 634-644.
6. Xiao, H, Li, H, Yu, G, Xiao, W, Hu, J, Tang, K, *et al.* (2014). MicroRNA-10b promotes migration and invasion through KLF4 and HOXD10 in human bladder cancer. *Oncol Rep* **31**: 1832-1838.
7. Zhang, Y, Zhang, D, Lv, J, Wang, S, and Zhang, Q (2018). MiR-125a-5p suppresses bladder cancer progression through targeting FUT4. *Biomed Pharmacother* **108**: 1039-1047.
8. Blick, C, Ramachandran, A, McCormick, R, Wigfield, S, Cranston, D, Catto, J, *et al.* (2015). Identification of a hypoxia-regulated miRNA signature in bladder cancer and a role for miR-145 in hypoxia-dependent apoptosis. *British Journal Of Cancer* **113**: 634.
9. Gottardo, F, Liu, CG, Ferracin, M, Calin, GA, Fassan, M, Bassi, P, *et al.* (2007). Micro-RNA profiling in kidney and bladder cancers. *Urol Oncol* **25**: 387-392.
10. Wang, G, Chan, ES, Kwan, BC, Li, PK, Yip, SK, Szeto, CC, *et al.* (2012). Expression of microRNAs in the urine of patients with bladder cancer. *Clin Genitourin Cancer* **10**: 106-113.
11. Itesako, T, Seki, N, Yoshino, H, Chiyomaru, T, Yamasaki, T, Hidaka, H, *et al.* (2014). The microRNA expression signature of bladder cancer by deep sequencing: the functional significance of the miR-195/497 cluster. *PloS one* **9**: e84311-e84311.
12. Chen, L, Yuan, L, Wang, G, Cao, R, Peng, J, Shu, B, *et al.* (2017). Identification and bioinformatics analysis of miRNAs associated with human muscle invasive bladder cancer. *Molecular medicine reports* **16**: 8709-8720.
13. Korpál, M, Ell, BJ, Buffa, FM, Ibrahim, T, Blanco, MA, Celià-Terrassa, T, *et al.* (2011). Direct targeting of Sec23a by miR-200s influences cancer cell secretome and promotes metastatic colonization. *Nature Medicine* **17**: 1101-1108.
14. Shimono, Y, Zabala, M, Cho, RW, Lobo, N, Dalerba, P, Qian, D, *et al.* (2009). Downregulation of miRNA-200c links breast cancer stem cells with normal stem cells. *Cell* **138**: 592-603.
15. Zhao, Z, Fan, X, Jiang, L, Xu, Z, Xue, L, Zhan, Q, *et al.* (2017). miR-503-3p promotes epithelial-mesenchymal transition in breast cancer by directly targeting SMAD2 and E-cadherin. *J Genet Genomics* **44**: 75-84.
16. Lee, CH, Kuo, WH, Lin, CC, Oyang, YJ, Huang, HC, and Juan, HF (2013). MicroRNA-regulated protein-protein interaction networks and their functions in breast cancer. *Int J Mol Sci* **14**: 11560-11606.
17. Kastl, L, Brown, I, and Schofield, AC (2012). miRNA-34a is associated with docetaxel resistance in human breast cancer cells. *Breast Cancer Res Treat* **131**: 445-454.

18. Damavandi, Z, Torkashvand, S, Vasei, M, Soltani, BM, Tavallaei, M, and Mowla, SJ (2016). Aberrant Expression of Breast Development-Related MicroRNAs, miR-22, miR-132, and miR-212, in Breast Tumor Tissues. *J Breast Cancer* **19**: 148-155.
19. Mohammadi-Yeganeh, S, Paryan, M, Mirab Samiee, S, Soleimani, M, Arefian, E, Azadmanesh, K, *et al.* (2013). Development of a robust, low cost stem-loop real-time quantification PCR technique for miRNA expression analysis. *Mol Biol Rep* **40**: 3665-3674.
20. Bhaumik, D, Scott, GK, Schokrpur, S, Patil, CK, Campisi, J, and Benz, CC (2008). Expression of microRNA-146 suppresses NF-kappaB activity with reduction of metastatic potential in breast cancer cells. *Oncogene* **27**: 5643-5647.
21. Luo, EC, Chang, YC, Sher, YP, Huang, WY, Chuang, LL, Chiu, YC, *et al.* (2014). MicroRNA-769-3p down-regulates NDRG1 and enhances apoptosis in MCF-7 cells during reoxygenation. *Sci Rep* **4**: 5908.
22. Pichler, M, Stiegelbauer, V, Vychytilova-Faltejskova, P, Ivan, C, Ling, H, Winter, E, *et al.* (2017). Genome-Wide miRNA Analysis Identifies miR-188-3p as a Novel Prognostic Marker and Molecular Factor Involved in Colorectal Carcinogenesis. *Clinical cancer research : an official journal of the American Association for Cancer Research* **23**: 1323-1333.
23. Sun, JY, Huang, Y, Li, JP, Zhang, X, Wang, L, Meng, YL, *et al.* (2012). MicroRNA-320a suppresses human colon cancer cell proliferation by directly targeting beta-catenin. *Biochem Biophys Res Commun* **420**: 787-792.
24. Zhang, Y, Li, M, Ding, Y, Fan, Z, Zhang, J, Zhang, H, *et al.* (2017). Serum MicroRNA profile in patients with colon adenomas or cancer. *BMC medical genomics* **10**: 23-23.
25. Song, B, Wang, Y, Xi, Y, Kudo, K, Bruheim, S, Botchkina, GI, *et al.* (2009). Mechanism of chemoresistance mediated by miR-140 in human osteosarcoma and colon cancer cells. *Oncogene* **28**: 4065-4074.
26. Yu, G, Tang, J-q, Tian, M-l, Li, H, Wang, X, Wu, T, *et al.* (2012). Prognostic values of the miR-17-92 cluster and its paralogs in colon cancer. *Journal of Surgical Oncology* **106**: 232-237.
27. Weber, D, Amar, L, Gödde, D, and Prinz, C (2018). Extensive screening of microRNA populations identifies hsa-miR-375 and hsa-miR-133a-3p as selective markers for human rectal and colon cancer. *Oncotarget* **9**: 27256-27267.
28. Tao, K, Yang, J, Guo, Z, Hu, Y, Sheng, H, Gao, H, *et al.* (2014). Prognostic value of miR-221-3p, miR-342-3p and miR-491-5p expression in colon cancer. *American journal of translational research* **6**: 391-401.
29. Liu, S-G, Qin, X-G, Zhao, B-S, Qi, B, Yao, W-J, Wang, T-Y, *et al.* (2013). Differential expression of miRNAs in esophageal cancer tissue. *Oncology letters* **5**: 1639-1642.
30. Slaby, O, Srovnal, J, Radova, L, Gregar, J, Juracek, J, Luzna, P, *et al.* (2015). Dynamic changes in microRNA expression profiles reflect progression of Barrett's esophagus to esophageal adenocarcinoma. *Carcinogenesis* **36**: 521-527.
31. Byrnes, KA, Phatak, P, Mansour, D, Xiao, L, Zou, T, Rao, JN, *et al.* (2016). Overexpression of miR-199a-5p decreases esophageal cancer cell proliferation through repression of mitogen-activated protein kinase kinase kinase-11 (MAP3K11). *Oncotarget* **7**: 8756-8770.
32. Streppel, MM, Pai, S, Campbell, NR, Hu, C, Yabuuchi, S, Canto, MI, *et al.* (2013). MicroRNA 223 is upregulated in the multistep progression of Barrett's esophagus and modulates sensitivity to chemotherapy by targeting PARP1. *Clin Cancer Res* **19**: 4067-4078.
33. Sun, Q, Zong, L, Zhang, H, Deng, Y, Zhang, C, and Zhang, L (2018). A 10-microRNA prognosis scoring system in esophageal squamous cell carcinoma constructed using bioinformatic methods. *Molecular medicine reports* **17**: 5222-5228.
34. Su, H, Jin, X, Zhang, X, Xue, S, Deng, X, Shen, L, *et al.* (2014). Identification of microRNAs involved in the radioresistance of esophageal cancer cells. *Cell Biology International* **38**: 318-325.

35. Komatsu, S, Ichikawa, D, Kawaguchi, T, Takeshita, H, Miyamae, M, Ohashi, T, *et al.* (2016). Plasma microRNA profiles: identification of miR-23a as a novel biomarker for chemoresistance in esophageal squamous cell carcinoma. *Oncotarget* **7**: 62034-62048.
36. Yin, J, Wang, X, Zheng, L, Shi, Y, Wang, L, Shao, A, *et al.* (2013). Hsa-miR-34b/c rs4938723 T>C and hsa-miR-423 rs6505162 C>A Polymorphisms Are Associated with the Risk of Esophageal Cancer in a Chinese Population. *PLOS ONE* **8**: e80570.
37. Yang, H, Gu, J, Wang, KK, Zhang, W, Xing, J, Chen, Z, *et al.* (2009). MicroRNA expression signatures in Barrett's esophagus and esophageal adenocarcinoma. *Clinical cancer research : an official journal of the American Association for Cancer Research* **15**: 5744-5752.
38. Zhang, K, Wu, X, Wang, J, Lopez, J, Zhou, W, Yang, L, *et al.* (2016). Circulating miRNA profile in esophageal adenocarcinoma. *American journal of cancer research* **6**: 2713-2721.
39. Lu, TX, Sherrill, JD, Wen, T, Plassard, AJ, Besse, JA, Abonia, JP, *et al.* (2012). MicroRNA signature in patients with eosinophilic esophagitis, reversibility with glucocorticoids, and assessment as disease biomarkers. *J Allergy Clin Immunol* **129**: 1064-1075.e1069.
40. Lin, C, Liu, A, Zhu, J, Zhang, X, Wu, G, Ren, P, *et al.* (2014). miR-508 sustains phosphoinositide signalling and promotes aggressive phenotype of oesophageal squamous cell carcinoma. *Nature Communications* **5**: 4620.
41. Li, G, Ren, S, Su, Z, Liu, C, Deng, T, Huang, D, *et al.* (2015). Increased expression of miR-93 is associated with poor prognosis in head and neck squamous cell carcinoma. *Tumour Biol* **36**: 3949-3956.
42. Hui, AB, Lenarduzzi, M, Krushel, T, Waldron, L, Pintilie, M, Shi, W, *et al.* (2010). Comprehensive MicroRNA profiling for head and neck squamous cell carcinomas. *Clin Cancer Res* **16**: 1129-1139.
43. Huang, Q, Yang, J, Zheng, J, Hsueh, C, Guo, Y, and Zhou, L (2018). Characterization of selective exosomal microRNA expression profile derived from laryngeal squamous cell carcinoma detected by next generation sequencing. *Oncology reports* **40**: 2584-2594.
44. Ogawa, T, Saiki, Y, Shiga, K, Chen, N, Fukushige, S, Sunamura, M, *et al.* (2012). miR-34a is downregulated in cis-diamminedichloroplatinum treated sinonasal squamous cell carcinoma patients with poor prognosis. *Cancer Sci* **103**: 1737-1743.
45. Saad, MA, Kuo, SZ, Rahimy, E, Zou, AE, Korrapati, A, Rahimy, M, *et al.* (2015). Alcohol-dysregulated miR-30a and miR-934 in head and neck squamous cell carcinoma. *Molecular cancer* **14**: 181-181.
46. Hou, B, Ishinaga, H, Midorikawa, K, Shah, SA, Nakamura, S, Hiraku, Y, *et al.* (2015). Circulating microRNAs as novel prognosis biomarkers for head and neck squamous cell carcinoma. *Cancer biology & therapy* **16**: 1042-1046.
47. Miao, L, Wang, L, Yuan, H, Hang, D, Zhu, L, Du, J, *et al.* (2016). MicroRNA-101 polymorphisms and risk of head and neck squamous cell carcinoma in a Chinese population. *Tumour Biol* **37**: 4169-4174.
48. Koshizuka, K, Hanazawa, T, Fukumoto, I, Kikkawa, N, Matsushita, R, Mataka, H, *et al.* (2017). Dual-receptor (EGFR and c-MET) inhibition by tumor-suppressive miR-1 and miR-206 in head and neck squamous cell carcinoma. *J Hum Genet* **62**: 113-121.
49. Liu, F, Zhao, X, Qian, Y, Zhang, J, Zhang, Y, and Yin, R (2017). MiR-206 inhibits Head and neck squamous cell carcinoma cell progression by targeting HDAC6 via PTEN/AKT/mTOR pathway. *Biomed Pharmacother* **96**: 229-237.
50. Xiao, W, Lou, N, Ruan, H, Bao, L, Xiong, Z, Yuan, C, *et al.* (2017). Mir-144-3p Promotes Cell Proliferation, Metastasis, Sunitinib Resistance in Clear Cell Renal Cell Carcinoma by Downregulating ARID1A. *Cell Physiol Biochem* **43**: 2420-2433.

51. White, NM, Khella, HW, Grigull, J, Adzovic, S, Youssef, YM, Honey, RJ, *et al.* (2011). miRNA profiling in metastatic renal cell carcinoma reveals a tumour-suppressor effect for miR-215. *Br J Cancer* **105**: 1741-1749.
52. Zhou, L, Li, Z, Pan, X, Lai, Y, Quan, J, Zhao, L, *et al.* (2018). Identification of miR-18a-5p as an oncogene and prognostic biomarker in RCC. *Am J Transl Res* **10**: 1874-1886.
53. Khella, HWZ, Butz, H, Ding, Q, Rotondo, F, Evans, KR, Kupchak, P, *et al.* (2015). miR-221/222 Are Involved in Response to Sunitinib Treatment in Metastatic Renal Cell Carcinoma. *Mol Ther* **23**: 1748-1758.
54. Carlsson, J, Christiansen, J, Davidsson, S, Giunchi, F, Fiorentino, M, and Sundqvist, P (2019). The potential role of miR-126, miR-21 and miR-10b as prognostic biomarkers in renal cell carcinoma. *Oncology letters* **17**: 4566-4574.
55. Vergho, DC, Kneitz, S, Kalogirou, C, Burger, M, Krebs, M, Rosenwald, A, *et al.* (2014). Impact of miR-21, miR-126 and miR-221 as Prognostic Factors of Clear Cell Renal Cell Carcinoma with Tumor Thrombus of the Inferior Vena Cava. *PLOS ONE* **9**: e109877.
56. Zaravinos, A, Lambrou, GI, Mourmouras, N, Katafygiotis, P, Papagregoriou, G, Giannikou, K, *et al.* (2014). New miRNA profiles accurately distinguish renal cell carcinomas and upper tract urothelial carcinomas from the normal kidney. *PLoS one* **9**: e91646-e91646.
57. Wulfken, LM, Moritz, R, Ohlmann, C, Holdenrieder, S, Jung, V, Becker, F, *et al.* (2011). MicroRNAs in Renal Cell Carcinoma: Diagnostic Implications of Serum miR-1233 Levels. *PLOS ONE* **6**: e25787.
58. Petillo, D, Kort, EJ, Anema, J, Furge, KA, Yang, XJ, and Teh, BT (2009). MicroRNA profiling of human kidney cancer subtypes. *Int J Oncol* **35**: 109-114.
59. Heinemann, FG, Tolkach, Y, Deng, M, Schmidt, D, Perner, S, Kristiansen, G, *et al.* (2018). Serum miR-122-5p and miR-206 expression: non-invasive prognostic biomarkers for renal cell carcinoma. *Clinical Epigenetics* **10**: 11.
60. Hong, Q, Li, O, Zheng, W, Xiao, W-z, Zhang, L, Wu, D, *et al.* (2017). LncRNA HOTAIR regulates HIF-1 $\alpha$ /AXL signaling through inhibition of miR-217 in renal cell carcinoma. *Cell Death & Disease* **8**: e2772-e2772.
61. Tian, Q, Liang, L, Ding, J, Zha, R, Shi, H, Wang, Q, *et al.* (2012). MicroRNA-550a Acts as a Pro-Metastatic Gene and Directly Targets Cytoplasmic Polyadenylation Element-Binding Protein 4 in Hepatocellular Carcinoma. *PLOS ONE* **7**: e48958.
62. Zheng, J, Sadot, E, Vigidal, JA, Klimstra, DS, Balachandran, VP, Kingham, TP, *et al.* (2018). Characterization of hepatocellular adenoma and carcinoma using microRNA profiling and targeted gene sequencing. *PLoS one* **13**: e0200776-e0200776.
63. Augello, C, Gianelli, U, Savi, F, Moro, A, Bonoldi, E, Gambacorta, M, *et al.* (2014). MicroRNA as potential biomarker in HCV-associated diffuse large B-cell lymphoma. *J Clin Pathol* **67**: 697-701.
64. Shih, TC, Tien, YJ, Wen, CJ, Yeh, TS, Yu, MC, Huang, CH, *et al.* (2012). MicroRNA-214 downregulation contributes to tumor angiogenesis by inducing secretion of the hepatoma-derived growth factor in human hepatoma. *J Hepatol* **57**: 584-591.
65. Gui, J, Tian, Y, Wen, X, Zhang, W, Zhang, P, Gao, J, *et al.* (2011). Serum microRNA characterization identifies miR-885-5p as a potential marker for detecting liver pathologies. *Clin Sci (Lond)* **120**: 183-193.
66. Yu, L, Ding, GF, He, C, Sun, L, Jiang, Y, and Zhu, L (2014). MicroRNA-424 is down-regulated in hepatocellular carcinoma and suppresses cell migration and invasion through c-Myb. *PLoS One* **9**: e91661.
67. Morishita, A, Iwama, H, Fujihara, S, Sakamoto, T, Fujita, K, Tani, J, *et al.* (2016). MicroRNA profiles in various hepatocellular carcinoma cell lines. *Oncology letters* **12**: 1687-1692.

68. Saito, Y, Suzuki, H, Matsuura, M, Sato, A, Kasai, Y, Yamada, K, *et al.* (2011). MicroRNAs in Hepatobiliary and Pancreatic Cancers. *Front Genet* **2**: 66.
69. Xie, F, Yuan, Y, Xie, L, Ran, P, Xiang, X, Huang, Q, *et al.* (2017). miRNA-320a inhibits tumor proliferation and invasion by targeting c-Myc in human hepatocellular carcinoma. *OncoTargets and therapy* **10**: 885-894.
70. Lin, K, Xu, T, He, B-S, Pan, Y-Q, Sun, H-L, Peng, H-X, *et al.* (2016). MicroRNA expression profiles predict progression and clinical outcome in lung adenocarcinoma. *OncoTargets and therapy* **9**: 5679-5692.
71. Leidinger, P, Backes, C, Blatt, M, Keller, A, Huwer, H, Lepper, P, *et al.* (2014). The blood-borne miRNA signature of lung cancer patients is independent of histology but influenced by metastases. *Molecular Cancer* **13**: 202.
72. Othman, N, In, LLA, Harikrishna, JA, and Hasima, N (2013). Bcl-xL Silencing Induces Alterations in hsa-miR-608 Expression and Subsequent Cell Death in A549 and SK-LU1 Human Lung Adenocarcinoma Cells. *PLOS ONE* **8**: e81735.
73. Dacic, S, Kelly, L, Shuai, Y, and Nikiforova, MN (2010). miRNA expression profiling of lung adenocarcinomas: correlation with mutational status. *Modern Pathology* **23**: 1577-1582.
74. Lin, Y, Lv, Y, Liang, R, Yuan, C, Zhang, J, He, D, *et al.* (2017). Four-miRNA signature as a prognostic tool for lung adenocarcinoma. *OncoTargets and therapy* **11**: 29-36.
75. Yang, F, Wei, K, Qin, Z, Liu, W, Shao, C, Wang, C, *et al.* (2018). MiR-598 Suppresses Invasion and Migration by Negative Regulation of Derlin-1 and Epithelial-Mesenchymal Transition in Non-Small Cell Lung Cancer. *Cellular Physiology and Biochemistry* **47**: 245-256.
76. Patnaik, SK, Yendamuri, S, Kannisto, E, Kucharczuk, JC, Singhal, S, and Vachani, A (2012). MicroRNA Expression Profiles of Whole Blood in Lung Adenocarcinoma. *PLOS ONE* **7**: e46045.
77. Galluzzi, L, Morselli, E, Vitale, I, Kepp, O, Senovilla, L, Criollo, A, *et al.* (2010). miR-181a and miR-630 Regulate Cisplatin-Induced Cancer Cell Death. *Cancer Research* **70**: 1793.
78. Ma, Y, Pan, X, Xu, P, Mi, Y, Wang, W, Wu, X, *et al.* (2017). Plasma microRNA alterations between EGFR-activating mutational NSCLC patients with and without primary resistance to TKI. *Oncotarget* **8**: 88529-88536.
79. Lee, J-H, Voortman, J, Dingemans, A-MC, Voeller, DM, Pham, T, Wang, Y, *et al.* (2011). MicroRNA Expression and Clinical Outcome of Small Cell Lung Cancer. *PLOS ONE* **6**: e21300.
80. Ma, J, Mannoor, K, Gao, L, Tan, A, Guarnera, MA, Zhan, M, *et al.* (2014). Characterization of microRNA transcriptome in lung cancer by next-generation deep sequencing. *Molecular Oncology* **8**: 1208-1219.
81. Zhang, K, Zhang, M, Jiang, H, Liu, F, Liu, H, and Li, Y (2018). Down-regulation of miR-214 inhibits proliferation and glycolysis in non-small-cell lung cancer cells via down-regulating the expression of hexokinase 2 and pyruvate kinase isozyme M2. *Biomed Pharmacother* **105**: 545-552.
82. Kim, MK, Jung, SB, Kim, JS, Roh, MS, Lee, JH, Lee, EH, *et al.* (2014). Expression of microRNA miR-126 and miR-200c is associated with prognosis in patients with non-small cell lung cancer. *Virchows Arch* **465**: 463-471.
83. Liu, XG, Zhu, WY, Huang, YY, Ma, LN, Zhou, SQ, Wang, YK, *et al.* (2012). High expression of serum miR-21 and tumor miR-200c associated with poor prognosis in patients with lung cancer. *Med Oncol* **29**: 618-626.
84. Bach, DH, Luu, TT, Kim, D, An, YJ, Park, S, Park, HJ, *et al.* (2018). BMP4 Upregulation Is Associated with Acquired Drug Resistance and Fatty Acid Metabolism in EGFR-Mutant Non-Small-Cell Lung Cancer Cells. *Mol Ther Nucleic Acids* **12**: 817-828.
85. Liu, XH, Lu, KH, Wang, KM, Sun, M, Zhang, EB, Yang, JS, *et al.* (2012). MicroRNA-196a promotes non-small cell lung cancer cell proliferation and invasion through targeting HOXA5. *BMC Cancer* **12**: 348.



86. Edmonds, MD, and Eischen, CM (2014). Differences in miRNA expression in early stage lung adenocarcinomas that did and did not relapse. *PLoS one* **9**: e101802-e101802.
87. Mazar, J, DeYoung, K, Khaitan, D, Meister, E, Almodovar, A, Goydos, J, *et al.* (2010). The regulation of miRNA-211 expression and its role in melanoma cell invasiveness. *PLoS one* **5**: e13779-e13779.
88. Weber, CE, Luo, C, Hotz-Wagenblatt, A, Gardyan, A, Kordass, T, Holland-Letz, T, *et al.* (2016). miR-339-3p Is a Tumor Suppressor in Melanoma. *Cancer Res* **76**: 3562-3571.
89. Lunavat, TR, Cheng, L, Einarsdottir, BO, Olofsson Bagge, R, Veppil Muralidharan, S, Sharples, RA, *et al.* (2017). BRAF(V600) inhibition alters the microRNA cargo in the vesicular secretome of malignant melanoma cells. *Proc Natl Acad Sci U S A* **114**: E5930-e5939.
90. Leidinger, P, Keller, A, Borries, A, Reichrath, J, Rass, K, Jager, SU, *et al.* (2010). High-throughput miRNA profiling of human melanoma blood samples. *BMC Cancer* **10**: 262.
91. Qian, H, Yang, C, and Yang, Y (2017). MicroRNA-26a inhibits the growth and invasiveness of malignant melanoma and directly targets on MITF gene. *Cell Death Discovery* **3**: 17028.
92. Fattore, L, Costantini, S, Malpicci, D, Ruggiero, CF, Ascierto, PA, Croce, CM, *et al.* (2017). MicroRNAs in melanoma development and resistance to target therapy. *Oncotarget* **8**: 22262-22278.
93. Chitsazzadeh, V, Coarfa, C, Drummond, JA, Nguyen, T, Joseph, A, Chilukuri, S, *et al.* (2016). Cross-species identification of genomic drivers of squamous cell carcinoma development across preneoplastic intermediates. *Nat Commun* **7**: 12601.
94. Wang, S, Han, H, Hu, Y, Yang, W, Lv, Y, Wang, L, *et al.* (2018). MicroRNA-130a-3p suppresses cell migration and invasion by inhibition of TBL1XR1-mediated EMT in human gastric carcinoma. *Mol Carcinog* **57**: 383-392.
95. Liu, J, Ma, L, Wang, Z, Wang, L, Liu, C, Chen, R, *et al.* (2014). MicroRNA expression profile of gastric cancer stem cells in the MKN-45 cancer cell line. *Acta Biochimica et Biophysica Sinica* **46**: 92-99.
96. Li, X, Luo, F, Li, Q, Xu, M, Feng, D, Zhang, G, *et al.* (2011). Identification of new aberrantly expressed miRNAs in intestinal-type gastric cancer and its clinical significance. *Oncol Rep* **26**: 1431-1439.
97. Zuo, QF, Zhang, R, Li, BS, Zhao, YL, Zhuang, Y, Yu, T, *et al.* (2015). MicroRNA-141 inhibits tumor growth and metastasis in gastric cancer by directly targeting transcriptional co-activator with PDZ-binding motif, TAZ. *Cell Death Dis* **6**: e1623.
98. Wu, Y-C, Liu, X, Wang, J-L, Chen, X-L, Lei, L, Han, J, *et al.* (2018). Soft-shelled turtle peptide modulates microRNA profile in human gastric cancer AGS cells. *Oncology letters* **15**: 3109-3120.
99. Zhang, QH, Yao, YL, Wu, XY, Wu, JH, Gu, T, Chen, L, *et al.* (2015). Anti-miR-362-3p Inhibits Migration and Invasion of Human Gastric Cancer Cells by Its Target CD82. *Dig Dis Sci* **60**: 1967-1976.
100. Pan, Y, Ren, F, Zhang, W, Liu, G, Yang, D, Hu, J, *et al.* (2014). Regulation of BGC-823 cell sensitivity to adriamycin via miRNA-135a-5p. *Oncol Rep* **32**: 2549-2556.
101. Li, X, Zhang, Y, Zhang, H, Liu, X, Gong, T, Li, M, *et al.* (2011). miRNA-223 promotes gastric cancer invasion and metastasis by targeting tumor suppressor EPB41L3. *Mol Cancer Res* **9**: 824-833.
102. Komatsu, S, Ichikawa, D, Tsujiura, M, Konishi, H, Takeshita, H, Nagata, H, *et al.* (2013). Prognostic impact of circulating miR-21 in the plasma of patients with gastric carcinoma. *Anticancer Res* **33**: 271-276.
103. Song, YX, Yue, ZY, Wang, ZN, Xu, YY, Luo, Y, Xu, HM, *et al.* (2011). MicroRNA-148b is frequently down-regulated in gastric cancer and acts as a tumor suppressor by inhibiting cell proliferation. *Mol Cancer* **10**: 1.

104. Hu, J, Li, C, Liu, C, Zhao, S, Wang, Y, and Fu, Z (2017). Expressions of miRNAs in papillary thyroid carcinoma and their associations with the clinical characteristics of PTC. *Cancer Biomark* **18**: 87-94.
105. Mohamad Yusof, A, Jamal, R, Muhammad, R, Abdullah Suhaimi, SN, Mohamed Rose, I, Saidin, S, *et al.* (2018). Integrated Characterization of MicroRNA and mRNA Transcriptome in Papillary Thyroid Carcinoma. *Frontiers in endocrinology* **9**: 158-158.
106. Swierniak, M, Wojcicka, A, Czetwertynska, M, Stachlewska, E, Maciag, M, Wiechno, W, *et al.* (2013). In-Depth Characterization of the MicroRNA Transcriptome in Normal Thyroid and Papillary Thyroid Carcinoma. *The Journal of Clinical Endocrinology & Metabolism* **98**: E1401-E1409.
107. Wang, C, Lu, S, Jiang, J, Jia, X, Dong, X, and Bu, P (2014). Hsa-microRNA-101 suppresses migration and invasion by targeting Rac1 in thyroid cancer cells. *Oncol Lett* **8**: 1815-1821.
108. Stokowy, T, Wojtaś, B, Krajewska, J, Stobiecka, E, Dralle, H, Musholt, T, *et al.* (2015). A two miRNA classifier differentiates follicular thyroid carcinomas from follicular thyroid adenomas. *Molecular and Cellular Endocrinology* **399**: 43-49.
109. Nikiforova, MN, Gandhi, M, Kelly, L, and Nikiforov, YE (2011). MicroRNA dysregulation in human thyroid cells following exposure to ionizing radiation. *Thyroid : official journal of the American Thyroid Association* **21**: 261-266.
110. Braun, J, Hoang-Vu, C, Dralle, H, and Hüttelmaier, S (2010). Downregulation of microRNAs directs the EMT and invasive potential of anaplastic thyroid carcinomas. *Oncogene* **29**: 4237-4244.
111. Marini, F, Luzi, E, and Brandi, ML (2011). MicroRNA Role in Thyroid Cancer Development. *Journal of thyroid research* **2011**: 407123-407123.
112. Liu, Y, Zhang, Y, Wu, H, Li, Y, Zhang, Y, Liu, M, *et al.* (2017). miR-10a suppresses colorectal cancer metastasis by modulating the epithelial-to-mesenchymal transition and anoikis. *Cell Death Dis* **8**: e2739.
113. Park, YR, Lee, ST, Kim, SL, Liu, YC, Lee, MR, Shin, JH, *et al.* (2016). MicroRNA-9 suppresses cell migration and invasion through downregulation of TM4SF1 in colorectal cancer. *Int J Oncol* **48**: 2135-2143.
114. Gaedcke, J, Grade, M, Camps, J, Sokilde, R, Kaczowski, B, Schetter, AJ, *et al.* (2012). The rectal cancer microRNAome--microRNA expression in rectal cancer and matched normal mucosa. *Clin Cancer Res* **18**: 4919-4930.
115. Nakano, H, Miyazawa, T, Kinoshita, K, Yamada, Y, and Yoshida, T (2010). Functional screening identifies a microRNA, miR-491 that induces apoptosis by targeting Bcl-XL in colorectal cancer cells. *International Journal of Cancer* **127**: 1072-1080.
116. Tateishi, Y, Okudela, K, Mitsui, H, Umeda, S, Suzuki, T, Kojima, Y, *et al.* (2015). The potential role of microRNA-31 expression in early colorectal cancer. *Pathol Int* **65**: 513-518.
117. Jacob, H, Stanisavljevic, L, Storli, KE, Hestetun, KE, Dahl, O, and Myklebust, MP (2018). A four-microRNA classifier as a novel prognostic marker for tumor recurrence in stage II colon cancer. *Scientific Reports* **8**: 6157.
118. Li, J, Zou, K, Yu, L, Zhao, W, Lu, Y, Mao, J, *et al.* (2018). MicroRNA-140 Inhibits the Epithelial-Mesenchymal Transition and Metastasis in Colorectal Cancer. *Mol Ther Nucleic Acids* **10**: 426-437.
119. Bu, P, Wang, L, Chen, KY, Rakhilin, N, Sun, J, Closa, A, *et al.* (2015). miR-1269 promotes metastasis and forms a positive feedback loop with TGF-beta. *Nat Commun* **6**: 6879.
120. Huang, L, Cai, JL, Huang, PZ, Kang, L, Huang, MJ, Wang, L, *et al.* (2017). miR19b-3p promotes the growth and metastasis of colorectal cancer via directly targeting ITGB8. *American journal of cancer research* **7**: 1996-2008.

121. Robertson, AG, Shih, J, Yau, C, Gibb, EA, Oba, J, Mungall, KL, *et al.* (2017). Integrative Analysis Identifies Four Molecular and Clinical Subsets in Uveal Melanoma. *Cancer Cell* **32**: 204-220.e215.
122. Raghunath, A, and Perumal, E (2015). Micro-RNAs and Their Roles in Eye Disorders. *Ophthalmic Research* **53**: 169-186.
123. Falzone, L, Romano, GL, Salemi, R, Bucolo, C, Tomasello, B, Lupo, G, *et al.* (2019). Prognostic significance of deregulated microRNAs in uveal melanomas. *Molecular medicine reports* **19**: 2599-2610.
124. Zheng, X, Tang, H, Zhao, X, Sun, Y, Jiang, Y, and Liu, Y (2017). Long non-coding RNA FTH1P3 facilitates uveal melanoma cell growth and invasion through miR-224-5p. *PLoS One* **12**: e0184746.
