# Supplementary material for: Artificial intelligence-driven pan-cancer analysis reveals miRNA signatures for cancer stage prediction
Source: PubMed Central journal article supplement — HGG Adv. 2023 Apr 3;4(3):100190. doi: 10.1016/j.xhgg.2023.100190 (PMC10130501; doi:10.1016/j.xhgg.2023.100190), 2023-04-03
Supplement: mmc2.pdf [file mmc2.pdf]

# Artificial intelligence-driven pan-cancer analysis reveals miRNA signatures for cancer stage prediction

Srinivasulu Yerukala Sathipati,<sup>1,\*</sup> Ming-Ju Tsai,<sup>2,3</sup> Sanjay K. Shukla,<sup>1</sup> and Shinn-Ying Ho<sup>4,5,6,7,8,\*</sup>

## Summary

The ability to detect cancer at an early stage in patients who would benefit from effective therapy is a key factor in increasing survivability. This work proposes an evolutionary supervised learning method called *CancerSig* to identify cancer stage-specific microRNA (miRNA) signatures for early cancer predictions. *CancerSig* established a compact panel of miRNA signatures as potential markers from 4,667 patients with 15 different types of cancers for the cancer stage prediction, and achieved a mean performance: 10-fold cross-validation accuracy, sensitivity, specificity, and area under the receiver operating characteristic curve of  $84.27\% \pm 6.31\%$ ,  $0.81 \pm 0.12$ ,  $0.80 \pm 0.10$ , and  $0.80 \pm 0.06$ , respectively. The pan-cancer analysis of miRNA signatures suggested that three miRNAs, hsa-let-7i-3p, hsa-miR-362-3p, and hsa-miR-3651, contributed significantly toward stage prediction across 8 cancers, and each of the 67 miRNAs of the panel was a biomarker of stage prediction in more than one cancer. *CancerSig* may serve as the basis for cancer screening and therapeutic selection.

## Introduction

Cancer is one of the major health problems in the world and causes millions of deaths every year. According to the Cancer Statistics, in 2019, there were 1,806,590 new cancer cases and 606,520 cancer deaths that were estimated to occur in the United States alone.<sup>1</sup> The cure for this complex disease remains elusive. Detecting cancer at an early stage in patients who would benefit from effective therapy is a key factor to increase survival. As regulators of gene expression in health and disease, microRNAs (miRNAs) may have potential roles as predictive biomarkers in cancer.<sup>2</sup>

MicroRNAs are a class of noncoding RNAs involved in the regulation of gene expression and control a number of diverse biological processes, including but not limited to differentiation, development, and growth, and are expressed in wide variety of organisms. These RNAs are transcribed from DNA sequences and consist of an average length of 22 nucleotides. Currently, there are 48,860 known mature miRNA sequences from 271 organisms, including 2,654 mature miRNA sequences from humans listed in miRBase,<sup>3</sup> although the functions of many of these miRNAs have yet to be discovered.

Next-generation sequencing has made it possible to examine the expression levels of numerous miRNAs in various cancers and investigate their association with cancer development and progression. Over the last two decades, crucial evidence has demonstrated that miRNAs and miRNA biogenesis mechanisms are involved in the

development of various cancers.<sup>4–6</sup> There is considerable evidence that the expression of miRNAs has been linked to a number of human cancers.<sup>4–6</sup> Depending on their target genes and under certain conditions, miRNAs either have oncogenic or tumor suppressor properties. MicroRNA expression profiles can also define cancer subtypes and are associated with varying treatment responses<sup>7</sup> and overall survival.<sup>8</sup> Identifying cancer-specific miRNA signatures and corresponding changes in gene expression over time is important for understanding the molecular basis of cancer and detecting early-stage cancers.

Accumulating evidence suggests that miRNA biomarkers can be effective in predicting early stages of cancer. For instance, miR-205, miR-210, and miR-708 have been used for early-stage detection of squamous cell lung cancer,<sup>9</sup> and 34 miRNAs as a signature for early-stage detection in breast cancer.<sup>10,11</sup> However, numerous miRNAs are expressed in cancers, and variability among different patients makes it challenging to determine true association between cancer and miRNA from spurious associations. Artificial Intelligence/machine learning methods may surmount these challenges by integrating and analyzing large datasets from numerous sources. Previously, we developed various machine learning-based cancer prediction models that contributed to survival prediction<sup>8,12–14</sup> and early-stage detection<sup>10</sup> in different cancer types.

Here, in pursuit of identifying the miRNA signatures that could aid in early-stage detection and may serve as general biomarkers for multiple cancer types, we present an evolutionary learning method called *CancerSig*. *CancerSig* is a

<sup>1</sup>Center for Precision Medicine Research, Marshfield Clinic Research Institute, Marshfield, WI 54449, USA; <sup>2</sup>Hinda and Arthur Marcus Institute for Aging Research at Hebrew Senior Life, Boston, MA, USA; <sup>3</sup>Department of Medicine, Beth Israel Deaconess Medical Center and Harvard Medical School, Boston, MA, USA; <sup>4</sup>Institute of Bioinformatics and Systems Biology, National Yang Ming Chiao Tung University, Hsinchu, Taiwan; <sup>5</sup>Department of Biological Science and Technology, National Yang Ming Chiao Tung University, Hsinchu, Taiwan; <sup>6</sup>College of Health Sciences, Kaohsiung Medical University, Kaohsiung, Taiwan; <sup>7</sup>Center for Intelligent Drug Systems and Smart Bio-devices (IDS<sup>2</sup>B), National Yang Ming Chiao Tung University, Hsinchu, Taiwan

<sup>8</sup>Lead contact

\*Correspondence: [sathipathi.srinivasulu@marshfieldclinic.org](mailto:sathipathi.srinivasulu@marshfieldclinic.org) (S.Y.S.), [syho@nctu.edu.tw](mailto:syho@nctu.edu.tw) (S.-Y.H.)

<https://doi.org/10.1016/j.xhgg.2023.100190>

© 2023 The Author(s). This is an open access article under the CC BY-NC-ND license (<http://creativecommons.org/licenses/by-nc-nd/4.0/>).

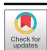

machine learning method using an inheritable bi-objective combinatorial genetic algorithm (IBCGA)<sup>15</sup> to identify cancer stage-specific miRNA signatures from 15 cancer types. Consequently, the miRNAs in each signatures were ranked based on their contribution to the prediction of early and advanced stages, and the top-ranked miRNAs analyzed using Kyoto Encyclopedia of Genes and Genomes (KEGG) pathways and Gene Ontology (GO) annotations to evaluate the biological significance of these connections. Pan-cancer analysis revealed similarities and differences in miRNA signatures across the 15 cancer types. CancerSig established a compact panel of 242 significant miRNAs across the 15 cancer types with a mean cross-validation accuracy of 84.27%. Analysis of the identified panel of miRNAs may serve as a predictive measure for early-stage diagnosis of cancer and have important implications in biomarker-based cancer therapeutics.

## Material and methods

### MicroRNA expression profiles

The dataset was retrieved from TCGA. We initially considered all 33 cancer types available in the TCGA database; however, the amount of miRNA data and clinical information for certain cancer types was limited and therefore excluded. Cancer types with a minimum number of 80 patients with miRNA expression profiles were included for analysis and limited the number of cancer types to 15 for further analysis. With this criterion, our dataset contained 6,578 clinical samples with miRNA expression profiles across 15 cancer types. After removing the samples without cancer staging information and miRNA sequence data, each cancer type contained an average of 311 clinical samples with 311 corresponding miRNA expression profiles where each miRNA profile contained an average of 474.46 miRNAs. Overall, there were 4,667 clinical samples with miRNA expression profiles, which included 7,117 miRNAs (with duplication) for 15 cancer types. Normalized mature miRNA sequence data for analysis was obtained using the Illumina HiSeq 2000 platform. For prediction purposes, the dataset was divided into early (stages I and II) and advanced stages (stages III and IV) based on stage information. The number of samples and miRNAs for each cancer type are shown in Table 1.

### Artificial intelligence-based prediction method

#### CancerSig

The novel cancer stage prediction method CancerSig identifies miRNA signatures to distinguish the early stage from advanced stage of various cancer types using their miRNA expression profiles with stage labels as input data. The output of CancerSig is the cancer-specific miRNA signatures and the panel of miRNA biomarkers for predicting cancer stages of multiple cancers. High performance of CancerSig arises mainly from an optimal feature selection algorithm IBCGA<sup>15</sup> incorporated with a support vector machine (SVM) classifier,<sup>16,17</sup> and pan-analysis of the miRNA signature. A brief summary of the methods is presented in the following paragraphs. The schematic diagram of CancerSig method is shown in Figure 1.

Identifying a minimal set of  $m$  miRNAs, i.e., a miRNA signature from a large set of  $n$  candidate miRNAs while maximizing the prediction performance, is a bi-objective combinatorial optimization

problem  $C(n, m)$  where the best value of  $m$  is not known in advance. The feature selection algorithm IBCGA uses an intelligent evolutionary algorithm<sup>18</sup> to solve a large combinatorial optimization problem and an inheritance mechanism to efficiently identify a robust set of  $m$  features in a single run. IBCGA uses an orthogonal array crossover operation with a systematic reasoning ability to reproduce better offspring instead of random recombination used for traditional crossover operations. Accumulated evidence has indicated that IBCGA is good at identifying informative signatures in various cancers,<sup>8,10,12,13,19</sup> and other bioinformatics problems.<sup>20,21</sup>

SVM is a well-known powerful classifier, which has been applied to a wide variety of biological applications.<sup>17</sup> SVM uses nonlinear transformation to map data from an input space to a higher-dimensional space to establish an accurate prediction model, especially when the training sample size is relatively small. We utilized the LibSVM<sup>22</sup> package with the radial basis function kernel to implement CancerSig. The scoring function of the RBF kernel is computed in the feature space between the two data points,  $x_i$  and  $x_j$ , defined as follows:

$$K(x_i, x_j) = \exp(-\gamma \|x_i - x_j\|^2) \quad (\text{Equation 1})$$

To identify the miRNA signature and design an optimal classifier, the feature selection of IBCGA and parameter setting (cost  $C$  and kernel  $\gamma$ ) of SVM play a vital role in modeling. IBCGA solves the problem  $C(n, m)$  for each cancer type independently. Taking bladder urothelial carcinoma (BLCA) with 477-miRNA expression profiles as an example,  $n = 477$ , and the value of  $m$  and the corresponding  $m$  miRNAs are determined by IBCGA. The parameter setting of IBCGA was  $r_{\text{start}} = 10$  and  $r_{\text{end}} = 50$  meaning that the search for the  $m$  value is from 10 to 50. The fitness function is to maximize prediction accuracy of 10-fold cross-validation (10-CV). The tuning parameters of the CancerSig were independent for the each cancer type. The detailed description of parameters and IBCGA algorithm can refer to the studies.<sup>10,12</sup> The main steps of IBCGA for identifying a signature of  $m$  miRNAs and the SVM classifier are as follows.

- Step 1 Randomly generate a population of  $N_{\text{pop}}$  individuals. In this work,  $N_{\text{pop}} = 50$ ,  $G_{\text{max}} = 60$ ,  $r_{\text{start}} = 10$ ,  $r_{\text{end}} = 50$ ,  $r = r_{\text{start}}$ .
- Step 2 Evaluate the fitness value of all individuals using the fitness function.
- Step 3 Use a tournament selection method that selects the winner from two randomly selected individuals to generate a mating pool.
- Step 4 Select two parents from the mating pool to perform an orthogonal array crossover operation.
- Step 5 Apply a conventional mutation operator to the randomly selected individuals in the new population. To prevent the highest fitness value from deteriorating, mutation is not applied to the best individuals.
- Step 6 If the stopping condition of  $G_{\text{max}}$  generation is satisfied, the best individual is the solution  $S_r$ . Otherwise, go to step 2.
- Step 7 If  $r < r_{\text{end}}$ , randomly change one bit in the binary genes for each individual from 0 to 1; increase the number  $r$  by one, and go to step 2. Otherwise, output the solution  $S_m$  with  $m$  miRNAs as a signature where  $S_m$  is the most accurate solution among the  $S_r$  solutions and stop the algorithm.

**Table 1. TCGA datasets considered and used for miRNA and cancer stage association analyses after filtration**

| Dataset                               | Abbreviation | Original samples | Final samples | miRNAs |
|---------------------------------------|--------------|------------------|---------------|--------|
| Bladder urothelial carcinoma          | BLCA         | 412              | 407           | 477    |
| Breast invasive carcinoma             | BRCA         | 1097             | 386           | 503    |
| Colon adenocarcinoma                  | COAD         | 458              | 221           | 444    |
| Esophageal carcinoma                  | ESCA         | 185              | 162           | 459    |
| Head and neck squamous cell carcinoma | HNSC         | 528              | 420           | 498    |
| Kidney renal clear cell carcinoma     | KIRC         | 537              | 256           | 420    |
| Kidney renal papillary cell carcinoma | KIRP         | 291              | 261           | 438    |
| Liver hepatocellular carcinoma        | LIHCC        | 377              | 348           | 540    |
| Lung adenocarcinoma                   | LUAD         | 522              | 452           | 477    |
| Lung squamous cell carcinoma          | LUSC         | 504              | 339           | 494    |
| Skin cutaneous melanoma               | SKCM         | 470              | 389           | 483    |
| Stomach adenocarcinoma                | STAD         | 443              | 381           | 459    |
| Thyroid carcinoma                     | THCA         | 503              | 500           | 474    |
| Rectum adenocarcinoma                 | READ         | 171              | 66            | 465    |
| Uveal melanoma                        | UVM          | 80               | 79            | 486    |

### Robust signature

The selection of a robust signature is necessary when using the nondeterministic algorithm IBCGA in which the solutions of multiple runs are not always the same. For each cancer type, the robust signature among  $R = 30$  solutions  $S_m$  had the largest appearance score using the following procedure.

Step 1 Perform  $R$  independent runs of IBCGA to obtain  $R$  signatures. There are  $P_t$  features (or miRNAs) in the  $t$ -th signatures,  $t = 1, \dots, R$ .

Step 2 The appearance score of a signature is calculated as follows:

- Calculate the feature frequency score  $f(p)$  for each miRNA  $p$  that ever appears in the  $R$  signatures.
- Calculate the score  $F_t$ ,  $t = 1, \dots, R$  where  $S_{it}$  is the  $i$ -th miRNA in the  $t$ -th signature:

$$F_t = \sum_{i=1}^{P_t} f(S_{it}) / P_t \quad (\text{Equation 3})$$

Step 3 Output the  $t$ -th signature with the largest appearance score  $F_t$  as the robust signature.

### KEGG pathway and GO annotation analysis

We utilized the DIANA-miRPath web-based server to analyze the miRNA signatures for downstream biological pathway analyses using KEGG and GO.<sup>23</sup> Plausible miRNA targets identified from the DIANA-TarBase/microT-CDs algorithm analyzed via hypergeometric distribution method using Fisher's exact test for enrichment analysis. A  $p$  value of  $<0.05$  was used as the threshold to describe statistical significance. To estimate the specificity of the results, we performed another pathway analysis for all identified miRNA signatures across the 15 cancer types. The GO annotations of the miRNA signatures were analyzed to identify miRNAs belonging to the specific GO categories of biological process, cellular components, and molecular function.

### Results

#### Identification of miRNA signatures across cancers

To identify the miRNA signatures associated with early and advanced stages across cancers, we obtained miRNA expression profiles from the clinical samples of 6,578 patients with cancers from TCGA. The TCGA network contains clinical and molecular information on 33 cancer types from tumor samples collected from 68 primary sites. After preprocessing the data, which included removal of duplicate samples, samples without stage information, and miRNAs that were not expressed in more than 80% of samples, the final dataset consisted of 4,667 clinical samples with cancer stage information. The clinical samples, miRNAs, and cancer types used in this study are summarized in Table 1.

To distinguish between early-stage and advanced-stage cancers via miRNA expression profiles, we proposed an evolutionary learning method, CancerSig, based on the feature selection algorithm IBCGA and SVM. Identifying a minimum number of features from a large number of candidate features while maximizing the prediction performance is a bi-objective combinatorial optimization problem that is effectively solved by IBCGA.<sup>20,24</sup> Because IBCGA is a nondeterministic method, we performed 30 independent runs and measured the appearance frequency of selected features to select one robust feature set of miRNAs as an miRNA signature for each of 15 cancers.<sup>10</sup> The schematic diagram of the CancerSig method is depicted in Figure 1.

The prediction performance of CancerSig across 15 cancer types is shown in Table 2. CancerSig identified 15 signatures with an average size of 21.93 miRNAs from

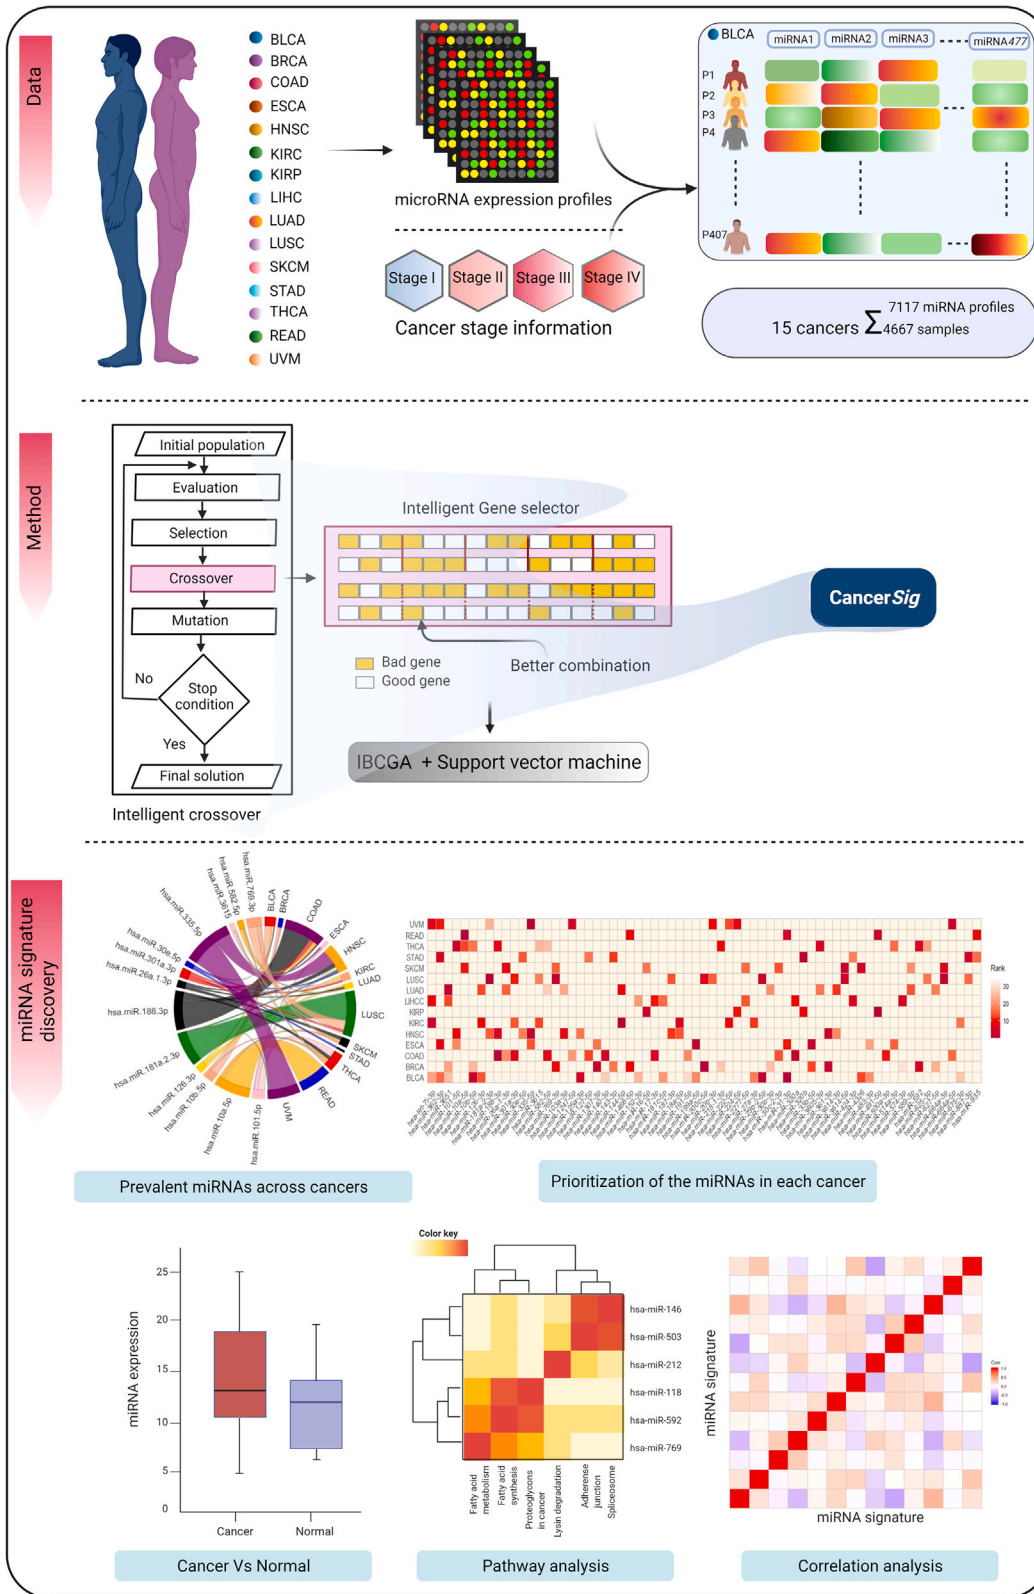

**Figure 1. Schematic diagram of the CancerSig method and analysis of the panel of miRNAs**

MicroRNA expression profiles of 15 cancer types along with cancer stage information are input in the workflow of the CancerSig method to identify miRNA signatures.



**Table 2. Prediction performance of CancerSig across 15 cancers**

|    | Dataset   | miRNA signature | 10-CV accuracy | Sensitivity | Specificity | MCC         | AUC         |
|----|-----------|-----------------|----------------|-------------|-------------|-------------|-------------|
| 1  | BLCA      | 35              | 84.40 ± 1.27   | 0.64 ± 0.04 | 0.93 ± 0.01 | 0.65 ± 0.02 | 0.82 ± 0.01 |
| 2  | BRCA      | 34              | 80.38 ± 1.55   | 0.79 ± 2.7  | 0.81 ± 2.26 | 0.60 ± 0.03 | 0.81 ± 0.02 |
| 3  | COAD      | 21              | 86.67 ± 2.40   | 0.89 ± 0.02 | 0.82 ± 0.03 | 0.73 ± 0.04 | 0.81 ± 0.02 |
| 4  | ESCA      | 22              | 87.97 ± 2.35   | 0.93 ± 0.02 | 0.78 ± 0.06 | 0.75 ± 0.04 | 0.78 ± 0.03 |
| 5  | HNSC      | 20              | 85.20 ± 1.4    | 0.52 ± 0.06 | 0.95 ± 0.01 | 0.57 ± 0.05 | 0.71 ± 0.03 |
| 6  | KIRC      | 18              | 87.14 ± 1.76   | 0.85 ± 0.02 | 0.87 ± 0.02 | 0.75 ± 0.03 | 0.87 ± 0.01 |
| 7  | KIRP      | 12              | 89.43 ± 2.01   | 0.96 ± 0.01 | 0.73 ± 0.06 | 0.76 ± 0.04 | 0.87 ± 0.03 |
| 8  | LIHCC     | 23              | 89.56 ± 1.27   | 0.94 ± 0.01 | 0.73 ± 0.03 | 0.71 ± 0.03 | 0.86 ± 0.02 |
| 9  | LUAD      | 29              | 74.29 ± 1.33   | 0.80 ± 0.02 | 0.65 ± 0.03 | 0.53 ± 0.02 | 0.7 ± 0.01  |
| 10 | LUSC      | 18              | 79.11 ± 2.28   | 0.74 ± 0.06 | 0.81 ± 0.02 | 0.61 ± 0.03 | 0.80 ± 0.02 |
| 11 | SKCM      | 27              | 78.71 ± 2.47   | 0.79 ± 0.03 | 0.76 ± 0.04 | 0.60 ± 0.03 | 0.75 ± 0.02 |
| 12 | STAD      | 20              | 77.03 ± 1.9    | 0.70 ± 0.03 | 0.79 ± 0.13 | 0.58 ± 0.03 | 0.78 ± 0.03 |
| 13 | THCA      | 26              | 76.37 ± 1.20   | 0.86 ± 0.02 | 0.61 ± 0.04 | 0.55 ± 0.02 | 0.71 ± 0.01 |
| 14 | READ      | 11              | 94.57 ± 2.8    | 0.90 ± 0.05 | 0.97 ± 0.02 | 0.88 ± 0.05 | 0.95 ± 0.03 |
| 15 | UVM       | 13              | 93.33 ± 3.5    | 0.93 ± 0.04 | 0.90 ± 0.13 | 0.86 ± 0.06 | 0.85 ± 0.03 |
|    | Mean ± SD | 21.93 ± 7.30    | 84.27 ± 6.31   | 0.81 ± 0.12 | 0.80 ± 0.10 | 0.67 ± 0.11 | 0.80 ± 0.06 |

10-CV, 10-fold cross-validations; MCC, Matthews correlation coefficient; AUC, area under the ROC curve; SD, standard deviation.

the profiles with an average of 474.5 miRNAs. CancerSig achieved a mean performance: 10-CV accuracy, sensitivity, specificity, Matthews correlation coefficient (MCC), and area under the receiver operating characteristic (ROC) area under the curve (AUC) of  $84.27\% \pm 6.31\%$ ,  $0.81 \pm 0.12$ ,  $0.80 \pm 0.10$ ,  $0.67 \pm 0.11$ , and  $0.80 \pm 0.06$ , respectively. The prediction performance was evaluated using ROC curves and AUC in the range of 0.70–0.95 for 15 cancers, as shown in Figure 2A.

We compared the prediction performance of CancerSig with various machine learning algorithms using the same number of features based on feature importance. LightGBM<sup>25</sup> achieved a mean performance: 10-CV accuracy, sensitivity, specificity, and AUC of  $72.22 \pm 0.04$ ,  $0.83 \pm 0.06$ ,  $0.51 \pm 0.14$ , and  $0.72 \pm 0.06$ , respectively, while distinguishing early and advanced stages of BLCA. XGBoost<sup>26</sup> achieved a mean 10-CV accuracy, sensitivity, specificity, and AUC of  $72.70 \pm 0.06$ ,  $0.88 \pm 0.06$ ,  $0.41 \pm 0.16$ , and  $0.73 \pm 0.05$ , respectively. Random Forest<sup>27</sup> achieved a mean 10-CV accuracy, sensitivity, specificity, and AUC of  $70.98 \pm 0.05$ ,  $0.77 \pm 0.07$ ,  $0.59 \pm 0.16$ , and  $0.74 \pm 0.05$ , respectively. CatBoost<sup>28</sup> achieved a mean 10-CV accuracy, sensitivity, specificity, and AUC of  $73.93 \pm 0.06$ ,  $0.91 \pm 0.07$ ,  $0.39 \pm 0.12$ , and  $0.74 \pm 0.05$ , respectively. Extra Trees achieved a mean 10-CV accuracy, sensitivity, specificity, and AUC of  $72.72 \pm 0.04$ ,  $0.78 \pm 0.07$ ,  $0.63 \pm 0.11$ , and  $0.74 \pm 0.06$ , respectively. CancerSig achieved a mean 10-CV accuracy, sensitivity, specificity, and AUC of  $84.40 \pm 1.27$ ,  $0.64 \pm 0.04$ ,  $0.93 \pm 0.01$ , and  $0.82 \pm 0.01$ , respectively, shown in Table S1. The prediction performance of CancerSig is better

than other machine learning methods in predicting cancer stage of BLCA. In addition, the prediction performance of the optimizing technique in distinguishing breast invasive carcinoma (BRCA) and liver hepatocellular carcinoma (LIHCC) was compared with other machine learning methods in our previous studies.<sup>10,29</sup>

#### A panel of miRNAs across 15 cancers

A panel is designed as a compact set of informative miRNAs obtained from the 15 miRNA signatures, which has 329 miRNAs in total. After removing duplication, the union has 242 informative miRNAs in the designed cancer-stage panel. The panel can predict the cancer stage across 15 cancer types. In predicting the stage of a specific cancer, the same prediction model with the corresponding signature in the panel can be used. Therefore, the prediction performance using the panel of miRNAs for predicting the 15 cancers achieved 10-CV accuracy, sensitivity, specificity, MCC, and AUCs of  $84.27\% \pm 6.31\%$ ,  $0.81 \pm 0.12$ ,  $0.80 \pm 0.10$ ,  $0.67 \pm 0.11$ , and  $0.80 \pm 0.06$ , respectively, as shown in Table 2.

#### Prioritization of the miRNA signatures

Each cancer type had an average of about 22 miRNAs in a signature. To rank the miRNAs of a signature according to the degree of contribution to prediction performance, a main effect difference (MED) analysis<sup>8,30</sup> was performed. A higher MED score represents a greater contribution of the specific miRNA to the stage prediction. The miRNAs with the greatest predictive ability can be ranked highest in the signature. The identified miRNA signatures, ranks

of their miRNAs, and corresponding MED scores are listed

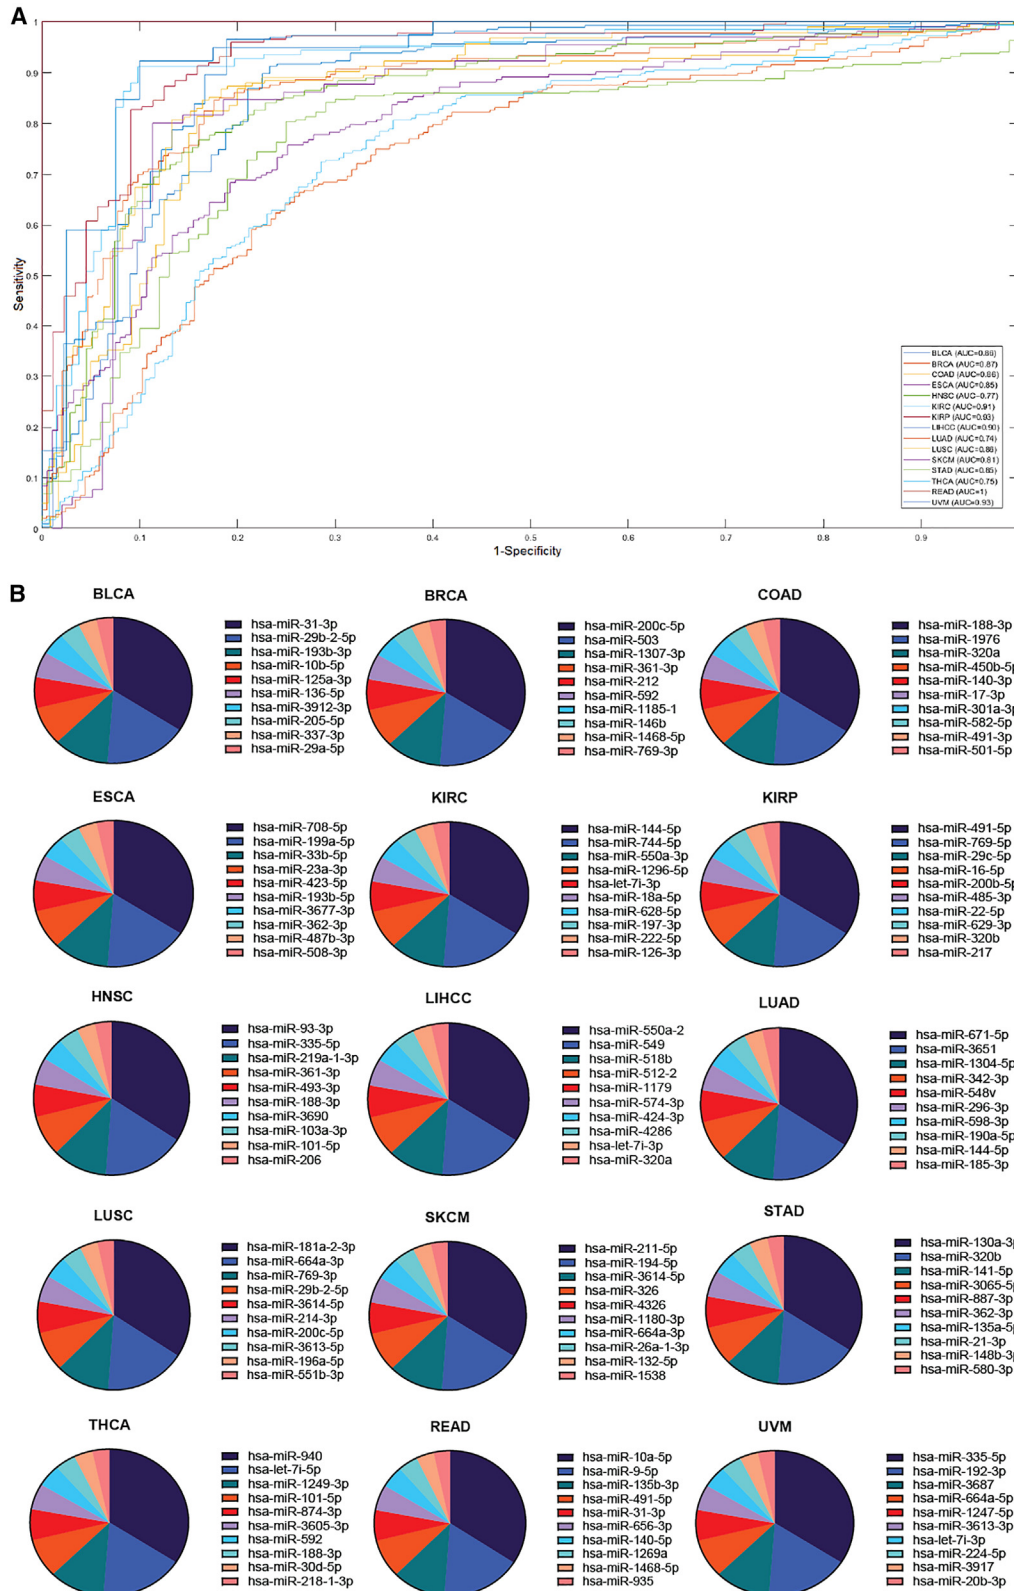

**Figure 2. CancerSig prediction performance across cancers**

(A) Evaluating the prediction performance of CancerSig using receiver operating characteristic (ROC) across 15 cancers. CancerSig obtained a mean area under the curve (AUC) of 0.80 across all cancers.  
 (B) Ranking of the relative miRNAs within the signature using MED analysis.

in [Tables S2.1–S2.15](#). The top 10 ranked miRNAs across 15 cancers are shown in [Figure 2B](#).

### Prevalent miRNAs across cancers

Next, we determined if there are any similarities among the miRNAs of each signature in addition to distinguishing stages across the 15 cancers. In this context, we identified some common miRNAs that were found to be expressed in more than one cancer. Three miRNAs, hsa-let-7i-3p, hsa-miR-362-3p, and hsa-miR-3651, contributed more toward stage prediction across eight cancer types (BLCA, BRCA, esophageal carcinoma [ESCA], kidney renal clear cell carcinoma [KIRC], LIHCC, lung adenocarcinoma [LUAD], stomach adenocarcinoma [STAD], and uveal melanoma [UVM]) than any other miRNAs. According to the MED analysis, hsa-let-7i-3p ranked 5th, 7th, 9th, and 22nd in predicting cancer stage in KIRC, UVM, LIHCC, and BLCA, respectively; hsa-miR-362-3p ranked 6th, 8th, 11th, and 16th in STAD, ESCA, UVM, and BLCA, respectively; and hsa-miR-3651 ranked 2nd, 13th, 22nd, and 26th in LUAD, LIHCC, BRCA, and BLCA, respectively. These miRNAs were annotated with miRBase accession numbers and used in subsequent pathway analyses.

The three target miRNAs were first analyzed via prediction interaction networks supported by Cytoscape v.3.7<sup>31</sup> to explore the proposed target gene interactions. From the three miRNA target prediction databases, miRTarBase, MicroCosm, and TargetScan, 1,839 predicted miRNA-target interactions were identified. The predicted miRNA-gene target network is shown in [Figure S1](#). In addition to the three primary miRNAs, 64 additional miRNAs were identified in the signatures where each was involved in more than one cancer. Among the 64 miRNAs, each of 14 miRNAs was involved in 3 cancers while each of the remaining 50 miRNAs was involved in 2 cancers. These prevalent miRNAs and their contribution in predicting the stage across cancers are depicted in [Figures 3A–3C](#).

To confirm that the expression levels of the identified target miRNAs differ significantly between tumor and non-tumor samples for each cancer type, we compared the relative expression difference of the three miRNAs, hsa-let-7i-3p, hsa-miR-362-3p, and hsa-miR-3651. Significant differences in expression levels between tumor samples and normal samples for all miRNAs analyzed were reported for BRCA, lung squamous cell carcinoma (LUSC), and STAD. Hsa-let-7i-3p and hsa-miR-362-3p were significantly expressed in BLCA, KIRC, LIHCC, and LUAD, while hsa-miR-362-3p and hsa-miR-3651 had significant differences in head and neck squamous cell carcinoma. A statistically significant difference in expression level for kidney renal papillary cell carcinoma (KIRP) was only detected for hsa-miR-362-3p; similarly, significant differences in expression for hsa-miR-3651 were only noted for ESCA and thyroid carcinoma. The relative expression levels of these miRNAs and corresponding comparisons are shown in [Table S3](#).

As the MED analysis, the top-ranked miRNAs are potential predictors of cancer stage. However, some miRNAs had

low ranks in some cancers yet high ranks in other cancer types. For instance, hsa-let-7i-3p ranked 22nd in BLCA but ranked 5th in KIRC meaning that its contribution to cancer stage was higher for KIRC. This analysis revealed a panel of 242 miRNAs that are associated with the cancer stage in more than 1 cancer. The heatmap of the most prevalent miRNA rankings across the 15 cancer types is depicted in [Figure 3D](#).

### Co-expression analysis of the miRNA signatures

Though IBCGA identified critical miRNA signatures for cancer stage prediction, the algorithm might exclude some informative miRNAs from the signatures to select a small set of candidate miRNAs to enhance prediction performance. To ensure a robust set of miRNAs selected by IBCGA, co-expression analysis was performed via series of correlational analyses. First, correlation coefficient (R) between the miRNAs in the signatures was measured and then the coefficients between all the miRNAs (an average 474.46) and individual miRNAs in the signature for each cancer type were measured. The miRNAs pairs with  $R \geq 0.80$  were considered for further analysis. There were 154 miRNA pairs that co-expressed with the miRNAs of 15 cancer stage-specific miRNA signatures. Of the signatures analyzed by cancer type, the miRNA signature for LUSC did not have co-expressed miRNAs with  $R \geq 0.8$ . The correlation heatmap of miRNAs in each of the 15 signatures is shown in [Figure S2](#), and the correlation coefficients of the 154 miRNA pairs for the 15 miRNA signatures are listed in [Table S4](#).

### Significance of the identified miRNA signatures in cancers

We evaluated the significance of the identified miRNAs for each cancer type based on experimentally validated literature and, of these miRNAs, only the top 10 ranked miRNAs of each signature were considered, as shown in [Tables S5–S19](#). Among the identified 15 cancer stage-specific miRNA signatures, most of have experimentally validated evidence to support their dysregulation and potential role in various cancers. However, of the 15 miRNA signatures, the role of 34 miRNAs was not reported in the earlier literature leading us to believe that these 34 miRNAs are novel biomarkers for predicting the cancer stage (listed in [Table S20](#)). The roles of these miRNAs in cancer stage detection need to be validated to further determine their significance.

To confirm that the selected miRNAs had differing expression levels by stage within each cancer, we measured the expression differences of the identified top 10 ranked miRNAs between the early- and advanced-stage groups across 15 cancers, as shown in [Figure S3](#). All of the identified miRNA signatures are significantly different between early- and late-stage cancers, which supports the use of these miRNAs in predicting early-stage cancers.

### Biological relevance of miRNA signatures across cancers

Employing KEGG analysis, we found that each miRNA signature was involved in several cancers and signaling



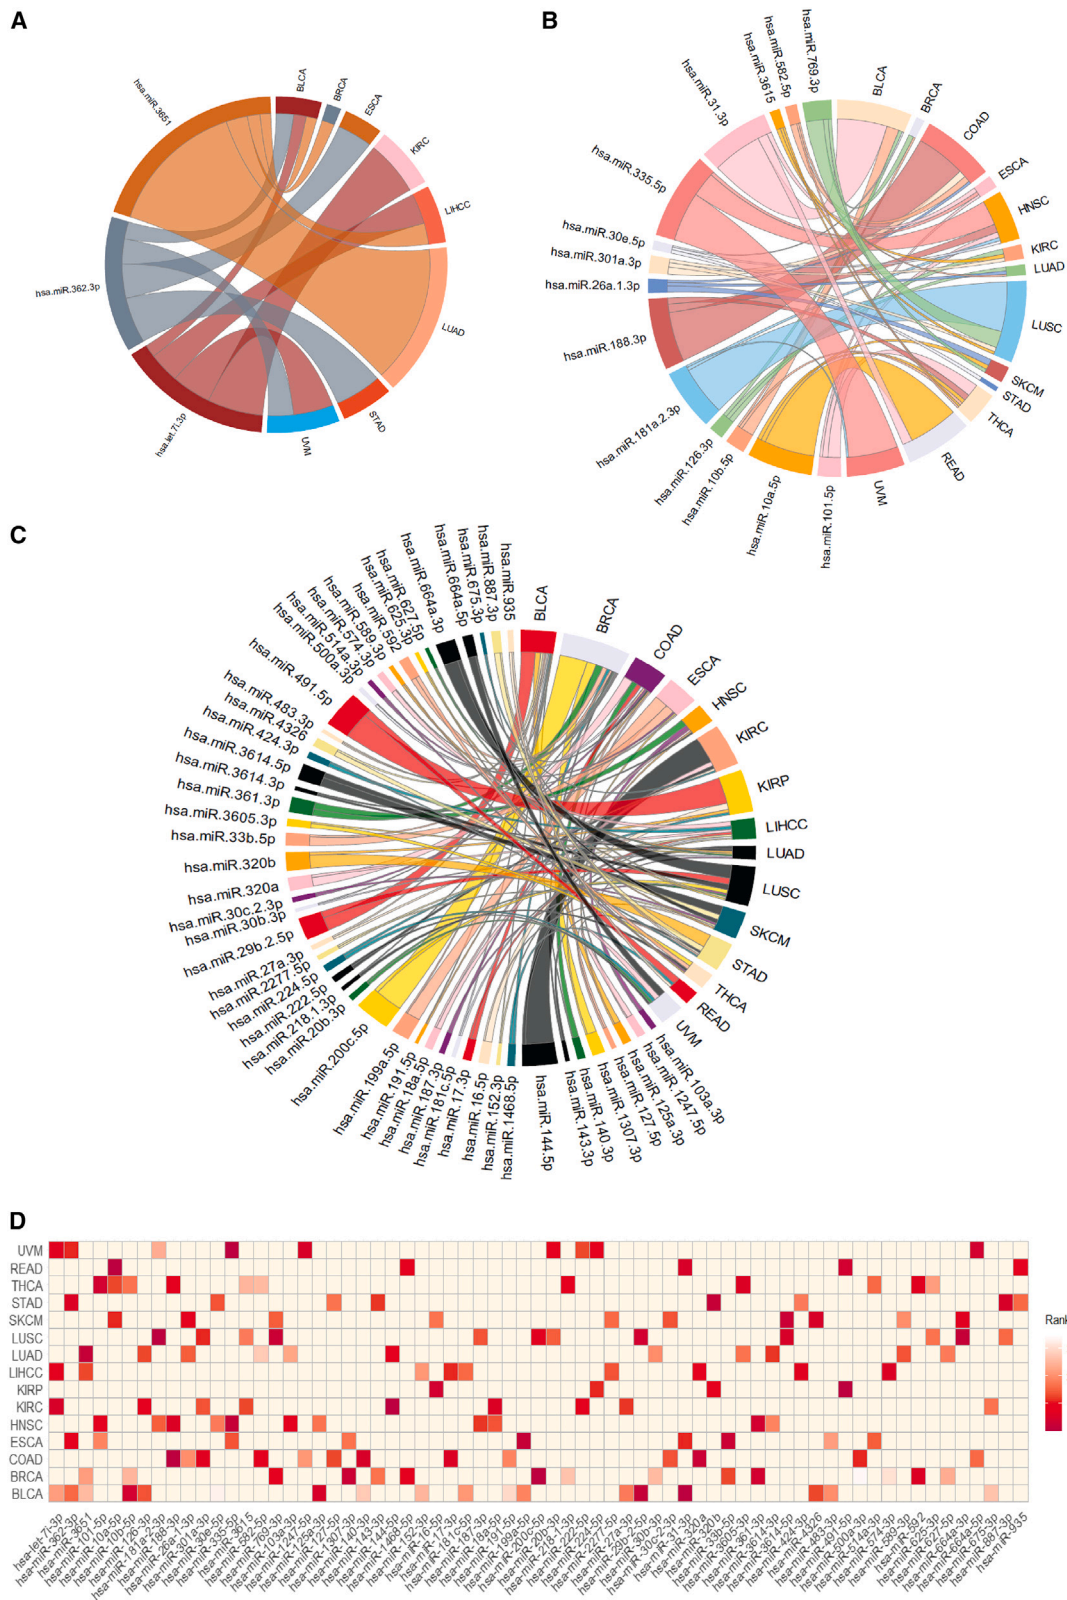

**Figure 3. The predictive ability of miRNAs as a biomarker for cancer stage across cancer types**

(A) Three signature miRNAs and their contributions to stage prediction across eight cancer types. Each miRNA contributed to at least four cancers. The size of the line is proportional to the percent contribution toward the stage prediction.

(B) Fourteen miRNAs contributed across cancers, and each miRNA contributed to at least three cancers.

(C) Fifty miRNAs contributed to at least two cancers.

(D) Heatmap showing 67 miRNAs and their ranks based on their predictive ability across 15 cancer types.



**Table 3. KEGG pathways commonly appearing in more than five cancers**

| KEGG pathways                                            | No. of cancers |
|----------------------------------------------------------|----------------|
| Proteoglycans in cancer                                  | 15             |
| Signaling pathways regulating pluripotency of stem cells | 14             |
| Beta signaling pathway                                   | 13             |
| Axon guidance                                            | 11             |
| Glioma                                                   | 10             |
| Hippo signaling pathway                                  | 10             |
| Renal cell carcinoma                                     | 10             |
| ErbB signaling pathway                                   | 9              |
| FoxO signaling pathway                                   | 9              |
| Pathways in cancer                                       | 9              |
| Prion diseases                                           | 9              |
| Rap1 signaling pathway                                   | 9              |
| Long-term depression                                     | 8              |
| Ras signaling pathway                                    | 8              |
| Circadian rhythm                                         | 7              |
| Focal adhesion                                           | 7              |
| Thyroid hormone signaling pathway                        | 7              |
| Adherens junction                                        | 6              |
| Colorectal cancer                                        | 6              |
| ECM-receptor interaction                                 | 6              |
| Estrogen signaling pathway                               | 6              |
| Melanoma                                                 | 6              |
| Morphine addiction                                       | 6              |
| Adrenergic signaling in cardio myocytes                  | 5              |
| Choline metabolism in cancer                             | 5              |
| Fatty acid biosynthesis                                  | 5              |
| Mucin type O-glycan biosynthesis                         | 5              |
| Oxytocin signaling pathway                               | 5              |
| Phosphatidylinositol signaling system                    | 5              |
| Prolactin signaling pathway                              | 5              |
| Prostate cancer                                          | 5              |
| Wnt signaling pathway                                    | 5              |

pathways, including transforming growth factor  $\beta$ , hippo, and the thyroid hormone signaling pathways as well as signaling pathways related to axon guidance (see [Table S21](#)). Of the cancer types analyzed, the proteoglycans in cancer pathway was observed in all 15 cancer types, which is consistent with the role of proteoglycans and extracellular matrix components in cancer development and progression.<sup>32–41</sup> In addition, the second KEGG pathway commonly found in 14 cancers was “Signaling pathways regulating the pluripotency of stem cells,” which has a wide range of applications in regenerative medicine

and significance in cancer.<sup>42</sup> A summary of the miRNA signatures that appeared in more than five cancer types and were identified as having potential involvement in biological pathways by KEGG pathway analysis is provided in [Table 3](#). The identified miRNA signatures enriched in KEGG pathways across the 15 cancer types are shown in [Figures S4.1–S4.15](#).

To support the biological validity of our findings, we performed GO enrichment analysis and identified GO terms that were enriched by the identified miRNA signatures. Among the 15 cancer types analyzed, 9 GO terms consistently appeared. The most frequent and significant GO terms that appeared were biosynthetic process, cellular component assembly, cellular nitrogen compound metabolic process, cellular protein modification process, epidermal growth factor receptor signaling pathway, Fc-epsilon receptor signaling pathway, gene expression, neurotrophin TRK receptor signaling pathway, transcription, and DNA template synthesis, listed in [Tables 4](#) and [S22](#). The identified miRNA signatures enriched in the various GO categories across 15 cancers are shown in [Figures S5.1–S5.15](#).

## Discussion

Due to the different types of cancers and the frequent emergence of cancer symptoms at advanced stages, it is challenging to detect cancer at an early stage. Identifying broad and reliable biomarkers for cancer detection and prediction in the early stage may provide timely treatment for patients.

In this study, we describe the development and preliminary predictive ability of cancer stage prediction method *CancerSig* using SVM combined with an optimal feature selection algorithm IBCGA to identify miRNA signatures associated with staging across various cancers. *CancerSig* identified 15 cancer stage-specific miRNA signatures for 15 different cancer types that are associated with the stage of patients with cancers. There were 242 miRNAs that showed promising predictive ability as a panel for stage detection across the 15 cancer types. Rankings of miRNAs via MED analysis highlighted the contribution of each miRNA to stage prediction. Of these, three miRNAs, hsa-let-7i-3p, hsa-miR-362-3p, and hsa-miR-3651, consistently had statistically significantly different expression levels between tumor and non-tumor samples and by cancer stage within the 15 cancer types analyzed. The biological plausibility of these miRNAs as reliable predictors of cancer development and progression are supported by the following evidences in the literature. Hu et al., Cai et al., and Zhao et al. reported that the hsa-let-7 family of miRNAs are dysregulated in several cancer types, such as, breast,<sup>43</sup> ovarian,<sup>44</sup> and non-small cell lung cancer.<sup>45</sup> Hsa-miR-362-3p and hsa-miR-3651 are also found to be regulated in different cancer types.<sup>46,47</sup>

Analysis of prevalent miRNAs within the total set of 242 miRNAs highlighted 67 miRNAs that contributed to 2 or more cancers. Out of the 67 miRNAs, 3 miRNAs each

**Table 4. GO category frequency in more than five cancers**

| GO category                                              | No. of cancers |
|----------------------------------------------------------|----------------|
| Biosynthetic process                                     | 15             |
| Cellular component assembly                              | 15             |
| Cellular nitrogen compound metabolic process             | 15             |
| Cellular protein modification process                    | 15             |
| Epidermal growth factor receptor signaling pathway       | 15             |
| Fc-epsilon receptor signaling pathway                    | 15             |
| Gene expression                                          | 15             |
| Neurotrophin TRK receptor signaling pathway              | 15             |
| Transcription, DNA template                              | 15             |
| Catabolic process                                        | 14             |
| Cytosol                                                  | 14             |
| Enzyme binding                                           | 14             |
| Ion binding                                              | 14             |
| Nucleic acid binding transcription factor activity       | 14             |
| Nucleoplasm                                              | 14             |
| Organelle                                                | 14             |
| Protein binding transcription factor activity            | 14             |
| Protein complex                                          | 14             |
| Small-molecule metabolic process                         | 14             |
| Blood coagulation                                        | 13             |
| Cytoskeletal protein binding                             | 13             |
| Symbiosis, encompassing mutualism through parasitism     | 13             |
| Viral process                                            | 13             |
| Macromolecular complex assembly                          | 12             |
| Fibroblast growth factor receptor signaling pathway      | 11             |
| Response to stress                                       | 11             |
| Cell death                                               | 10             |
| Phosphatidylinositol-mediated signaling                  | 10             |
| Nucleobase-containing compound catabolic process         | 9              |
| Synaptic transmission                                    | 9              |
| Mitotic cell cycle                                       | 7              |
| Protein complex assembly                                 | 7              |
| Enzyme regulator activity                                | 6              |
| Transcription initiation from RNA polymerase II promoter | 6              |

contributed to four cancers, 14 miRNAs each contributed to 3 cancers, and 50 miRNAs each contributed to 2 cancers. The 15 miRNA signatures were all significantly involved in

various signaling pathways, extracellular matrix-associated signaling, and stem cell pluripotency according to KEGG pathway analysis and GO term assignment post-enrichment analysis. One hundred and fifty-four miRNAs co-expressed with the miRNA signatures across cancers were associated with cancer progression and early-stage detection. Of the miRNAs detected within the signature and associated with cancer stage, 34 miRNAs that we describe here have not been reported before. Further research of these miRNAs may provide new avenues for therapeutic and diagnostic test development.

Across all cancer types, miRNA signatures were enriched for proteins associated with proteoglycans. Proteoglycans are macromolecules and the major component of the extracellular matrix. They act as co-receptors for enhancing proliferative signaling and tumor growth.<sup>34</sup> Notably, the altered expression of proteoglycans correlates with prognosis in various malignant neoplasms.<sup>33,35</sup> In addition, proteoglycan-dependent pathways are involved in promoting metastasis and cell motility in breast cancer.<sup>36,37</sup> The miRNAs regulate enzymes that are directly linked to proteoglycan function and are involved in tumor progression.<sup>38,39</sup> The aberrant expression of miRNAs affects the expression patterns of laminins, proteoglycans, and proteases in the tumor microenvironment<sup>40</sup>; consequently, cell adhesion, migration, and apoptosis and cancer stem cell properties are affected.<sup>41</sup> In addition, multiple roles of miRNAs in pluripotency have been investigated, including but not limited to cell fate during embryogenesis<sup>48</sup> and the regulation of stem cells.<sup>49</sup> The upregulation of miR-495 was observed in breast cancer stem cells,<sup>50</sup> and miR-34a is downregulated and regulates cancer stem cells in prostate cancer.<sup>51</sup> The finding suggests that a specific miRNA signature regulates proteoglycans in the tumor microenvironment and stem cell pluripotency, which may have a profound impact on early-stage cancer detection.

High performance of *CancerSig* arises mainly from an optimal feature selection algorithm IBCGA incorporated with an SVM classifier. IBCGA is effective at solving bi-objective combinatorial optimization problems and has been proven to be efficient at identifying suitable biomarkers in various cancers.<sup>8,10,12,13,52</sup> *CancerSig* achieved a promising accuracy while predicting the cancer stage across 15 different cancer types; and obtained a mean performance of 10-CV accuracy, sensitivity, specificity, MCC, AUC of  $84.27 \pm 6.31$ ,  $0.81 \pm 0.12$ ,  $0.80 \pm 0.10$ ,  $0.67 \pm 0.11$ , and  $0.80 \pm 0.06$ , respectively. The limitation of the current method is using the TCGA data alone for the experiments due to the availability of similar extraction methods for miRNA expression profiling and clinical information. However, *CancerSig* showed better performance on all cancer types irrespective of the data size. This method can be customized based on the availability of miRNA expression data and clinical samples.

In conclusion, identification of the novel miRNA signatures via *CancerSig* may serve as the basis for predicting the development and stage of various types of cancer. Use of

this method may aid in early identification of cancer and cancer stage, which would facilitate clinician decision making for treatment plans and provide patients with timely treatment for cancer. The designed novel panel of miRNA signatures across cancers would guide the development of stage detection chips and miRNA-based target therapies to treat cancer.

### Data and code availability

All the data used in this analysis can be found in the TCGA data portal: <https://portal.gdc.cancer.gov/> CancerSig is available at Github: <https://github.com/mingjutsai/CancerSig>.

### Supplemental information

Supplemental information can be found online at <https://doi.org/10.1016/j.xhgg.2023.100190>.

### Acknowledgments

This work was supported in part by the Marshfield Clinic Research Institute, Marshfield, WI, United States. The Ministry of Science and Technology ROC under contract numbers MOST 111-2740-B-400-002- and 110-2221-E-A49-099-MY3, and was financially supported by the “Center For Intelligent Drug Systems and Smart Bio-devices (IDS<sup>2</sup>B)” from The Featured Areas Research Center Program within the framework of the Higher Education Sprout Project by the Ministry of Education (MOE) in Taiwan. The funders had no role in the study design, data collection and analysis, decision to publish, or preparation of the manuscript. The authors also acknowledge Emily Andreae, PhD, from the Marshfield Clinic Research Institute for manuscript editing assistance.

### Author contributions

S.Y.S. and S.-Y.H. designed the system and carried out the detailed study. S.-Y.S. participated in the design of the system and implemented programs. M.-J.T., S.K.S., S.-Y.H., and S.-Y.S. participated in analysis and discussed the results. All authors participated in the manuscript preparation and approved the final manuscript.

### Declaration of interests

The authors declare no competing interests.

Received: August 29, 2022

Accepted: March 30, 2023

### Web resources

CancerSig, <https://github.com/mingjutsai/CancerSig>

### References

1. Siegel, R.L., Miller, K.D., and Jemal, A. (2019). Cancer statistics, 2019. *CA. Cancer J. Clin.* *69*, 7–34.
2. van Schooneveld, E., Wildiers, H., Vergote, I., Vermeulen, P.B., Dirix, L.Y., and Van Laere, S.J. (2015). Dysregulation of microRNAs in breast cancer and their potential role as prognostic and predictive biomarkers in patient management. *Breast Cancer Res.* *17*, 21.
3. Kozomara, A., Birgaoanu, M., and Griffiths-Jones, S. (2019). miRBase: from microRNA sequences to function. *Nucleic Acids Res.* *47*, D155–D162.
4. Peng, Y., and Croce, C.M. (2016). The role of MicroRNAs in human cancer. *Signal Transduct. Target. Ther.* *1*, 15004.
5. Croce, C.M. (2009). Causes and consequences of microRNA dysregulation in cancer. *Nat. Rev. Genet.* *10*, 704–714.
6. Lu, J., Getz, G., Miska, E.A., Alvarez-Saavedra, E., Lamb, J., Peck, D., Sweet-Cordero, A., Ebert, B.L., Mak, R.H., Ferrando, A.A., et al. (2005). MicroRNA expression profiles classify human cancers. *Nature* *435*, 834–838.
7. Kim, T.M., Huang, W., Park, R., Park, P.J., and Johnson, M.D. (2011). A developmental taxonomy of glioblastoma defined and maintained by MicroRNAs. *Cancer Res.* *71*, 3387–3399.
8. Yerukala Sathipati, S., and Ho, S.-Y. (2017). Identifying the miRNA signature associated with survival time in patients with lung adenocarcinoma using miRNA expression profiles. *Sci. Rep.* *7*, 7507.
9. Xing, L., Todd, N.W., Yu, L., Fang, H., and Jiang, F. (2010). Early detection of squamous cell lung cancer in sputum by a panel of microRNA markers. *Mod. Pathol.* *23*, 1157–1164.
10. Yerukala Sathipati, S., and Ho, S.-Y. (2018). Identifying a miRNA signature for predicting the stage of breast cancer. *Sci. Rep.* *8*, 16138.
11. Shimomura, A., Shiino, S., Kawauchi, J., Takizawa, S., Sakamoto, H., Matsuzaki, J., Ono, M., Takeshita, F., Niida, S., Shimizu, C., et al. (2016). Novel combination of serum microRNA for detecting breast cancer in the early stage. *Cancer Sci.* *107*, 326–334.
12. Yerukala Sathipati, S., Sahu, D., Huang, H.-C., Lin, Y., and Ho, S.-Y. (2019). Identification and characterization of the lncRNA signature associated with overall survival in patients with neuroblastoma. *Sci. Rep.* *9*, 5125.
13. Yerukala Sathipati, S., Huang, H.L., and Ho, S.Y. (2016). Estimating survival time of patients with glioblastoma multiforme and characterization of the identified microRNA signatures. *BMC Genom.* *17*, 1022.
14. Sathipati, S.Y., and Ho, S.Y. (2021). Identification of the miRNA signature associated with survival in patients with ovarian cancer. *Aging (Albany NY)* *13*, 12660–12690.
15. Ho, S.-Y., Chen, J.-H., and Huang, M.-H. (2004). Inheritable genetic algorithm for biobjective 0/1 combinatorial optimization problems and its applications. *IEEE Trans. Syst. Man Cybern. B Cybern.* *34*, 609–620.
16. Vapnik, V.N. (1999). An overview of statistical learning theory. *IEEE Trans. Neural Netw.* *10*, 988–999.
17. Noble, W.S. (2006). What is a support vector machine? *Nat. Biotechnol.* *24*, 1565–1567.
18. Ho, S.-Y., Shu, L.-S., and Chen, J.-H. (2004). Intelligent evolutionary algorithms for large parameter optimization problems. *IEEE Trans. Evol. Comput.* *8*, 522–541.
19. Yerukala Sathipati, S., Tsai, M.J., Shukla, S.K., Ho, S.Y., Liu, Y., and Beheshti, A. (2022). MicroRNA signature for estimating the survival time in patients with bladder urothelial carcinoma. *Sci. Rep.* *12*, 4141.
20. Wang, J.-R., Huang, W.-L., Tsai, M.-J., Hsu, K.-T., Huang, H.-L., and Ho, S.-Y. (2017). ESA-UbiSite: accurate prediction of human ubiquitination sites by identifying a set of effective negatives. *Bioinformatics* *33*, 661–668.
21. Tsai, M.-J., Wang, J.-R., Ho, S.-J., Shu, L.-S., Huang, W.-L., and Ho, S.-Y. (2020). GREMA: modelling of emulated gene

- regulatory networks with confidence levels based on evolutionary intelligence to cope with the underdetermined problem. *Bioinformatics* 36, 3833–3840.
22. Chang, C.-C., and Lin, C.-J. (2011). LIBSVM: a library for support vector machines. *ACM Trans. Intell. Syst. Technol.* 2, 1–27.
  23. Vlachos, I.S., Zagganas, K., Paraskevopoulou, M.D., Georgakilas, G., Karagkouni, D., Vergoulis, T., Dalamagas, T., and Hatzigeorgiou, A.G. (2015). DIANA-miRPath v3.0: deciphering microRNA function with experimental support. *Nucleic Acids Res.* 43, W460–W466.
  24. Tung, C.-W., and Ho, S.-Y. (2007). POPI: predicting immunogenicity of MHC class I binding peptides by mining informative physicochemical properties. *Bioinformatics* 23, 942–949.
  25. Ke, G., Meng, Q., Finley, T., Wang, T., Chen, W., Ma, W., Ye, Q., and Liu, T.-Y. (2017). LightGBM: a highly efficient gradient boosting decision tree. In *NIPS*.
  26. Chen, T., and Guestrin, C. (2016). XGBoost: a scalable tree boosting system. In *Proceedings of the 22nd ACM SIGKDD International Conference on Knowledge Discovery and Data Mining (Association for Computing Machinery)*, pp. 785–794.
  27. Pedregosa, F., Varoquaux, G., Gramfort, A., Michel, V., Thirion, B., Grisel, O., Blondel, M., Prettenhofer, P., Weiss, R., Dubourg, V., et al. (2011). Scikit-learn: machine learning in Python. *J. Mach. Learn. Res.* 12, 2825–2830.
  28. Dorogush, A.V., Ershov, V., and Gulin, A. (2018). CatBoost: gradient boosting with categorical features support. Preprint at arXiv. <https://doi.org/10.48550/arXiv.1810.11363>.
  29. Yerukala Sathipati, S., and Ho, S.-Y. (2020). Novel miRNA signature for predicting the stage of hepatocellular carcinoma. *Sci. Rep.* 10, 14452.
  30. Tung, C.W., and Ho, S.Y. (2008). Computational identification of ubiquitylation sites from protein sequences. *BMC Bioinf.* 9, 310.
  31. Shannon, P., Markiel, A., Ozier, O., Baliga, N.S., Wang, J.T., Ramage, D., Amin, N., Schwikowski, B., and Ideker, T. (2003). Cytoscape: a software environment for integrated models of biomolecular interaction networks. *Genome Res.* 13, 2498–2504.
  32. Hanahan, D., and Weinberg, R.A. (2011). Hallmarks of cancer: the next generation. *Cell* 144, 646–674.
  33. Theocharis, A.D., Skandalis, S.S., Tzanakakis, G.N., and Karamanos, N.K. (2010). Proteoglycans in health and disease: novel roles for proteoglycans in malignancy and their pharmacological targeting. *FEBS J.* 277, 3904–3923.
  34. Barash, U., Cohen-Kaplan, V., Doweck, I., Sanderson, R.D., Ilan, N., and Vlodavsky, I. (2010). Proteoglycans in health and disease: new concepts for heparanase function in tumor progression and metastasis. *FEBS J.* 277, 3890–3903.
  35. Sofeu Feugaing, D.D., Götte, M., and Viola, M. (2013). More than matrix: the multifaceted role of decorin in cancer. *Eur. J. Cell Biol.* 92, 1–11.
  36. Hassan, H., Greve, B., Pavao, M.S.G., Kiesel, L., Ibrahim, S.A., and Götte, M. (2013). Syndecan-1 modulates beta-integrin-dependent and interleukin-6-dependent functions in breast cancer cell adhesion, migration, and resistance to irradiation. *FEBS J.* 280, 2216–2227.
  37. Ibrahim, S.A., Yip, G.W., Stock, C., Pan, J.W., Neubauer, C., Poeter, M., Pupjalis, D., Koo, C.Y., Kelsch, R., Schüle, R., et al. (2012). Targeting of syndecan-1 by microRNA miR-10b promotes breast cancer cell motility and invasiveness via a Rho-GTPase- and E-cadherin-dependent mechanism. *Int. J. Cancer* 131, E884–E896.
  38. Götte, M., and Yip, G.W. (2006). Heparanase, hyaluronan, and CD44 in cancers: a breast carcinoma perspective. *Cancer Res.* 66, 10233–10237.
  39. Ibrahim, S.A., Hassan, H., and Götte, M. (2014). MicroRNA regulation of proteoglycan function in cancer. *FEBS J.* 281, 5009–5022.
  40. Götte, M., and Kovalszky, I. (2018). Extracellular matrix functions in lung cancer. *Matrix Biol.* 73, 105–121.
  41. Asuthkar, S., Velpula, K.K., Nalla, A.K., Gogineni, V.R., Gondi, C.S., and Rao, J.S. (2014). Irradiation-induced angiogenesis is associated with an MMP-9-miR-494-syndecan-1 regulatory loop in medulloblastoma cells. *Oncogene* 33, 1922–1933.
  42. Takahashi, K., Tanabe, K., Ohnuki, M., Narita, M., Ichisaka, T., Tomoda, K., and Yamanaka, S. (2007). Induction of pluripotent stem cells from adult human fibroblasts by defined factors. *Cell* 131, 861–872.
  43. Hu, X., Guo, J., Zheng, L., Li, C., Zheng, T.M., Tanyi, J.L., Liang, S., Benedetto, C., Mitidieri, M., Katsaros, D., et al. (2013). The heterochronic microRNA let-7 inhibits cell motility by regulating the genes in the actin cytoskeleton pathway in breast cancer. *Mol. Cancer Res.* 11, 240–250.
  44. Cai, J., Yang, C., Yang, Q., Ding, H., Jia, J., Guo, J., Wang, J., and Wang, Z. (2013). Deregulation of let-7e in epithelial ovarian cancer promotes the development of resistance to cisplatin. *Oncogenesis* 2, e75.
  45. Zhao, B., Han, H., Chen, J., Zhang, Z., Li, S., Fang, F., Zheng, Q., Ma, Y., Zhang, J., Wu, N., and Yang, Y. (2014). MicroRNA let-7c inhibits migration and invasion of human non-small cell lung cancer by targeting ITGB3 and MAP4K3. *Cancer Lett.* 342, 43–51.
  46. Shen, H., Li, W., Tian, Y., Xu, P., Wang, H., Zhang, J., and Li, Y. (2015). Upregulation of miR-362-3p modulates proliferation and anchorage-independent growth by directly targeting Tob2 in hepatocellular carcinoma. *J. Cell. Biochem.* 116, 1563–1573.
  47. Pellatt, D.F., Stevens, J.R., Wolff, R.K., Mullany, L.E., Herrick, J.S., Samowitz, W., and Slattery, M.L. (2016). Expression profiles of miRNA subsets distinguish human colorectal carcinoma and normal colonic mucosa. *Clin. Transl. Gastroenterol.* 7, e152.
  48. Houbaviy, H.B., Murray, M.F., and Sharp, P.A. (2003). Embryonic stem cell-specific MicroRNAs. *Dev. Cell* 5, 351–358.
  49. Li, N., Long, B., Han, W., Yuan, S., and Wang, K. (2017). microRNAs: important regulators of stem cells. *Stem Cell Res. Ther.* 8, 110.
  50. Hwang-Verslues, W.W., Chang, P.H., Wei, P.C., Yang, C.Y., Huang, C.K., Kuo, W.H., Shew, J.Y., Chang, K.J., Lee, E.Y., and Lee, W.H. (2011). miR-495 is upregulated by E12/E47 in breast cancer stem cells, and promotes oncogenesis and hypoxia resistance via downregulation of E-cadherin and REDD1. *Oncogene* 30, 2463–2474.
  51. Kashat, M., Azzouz, L., Sarkar, S.H., Kong, D., Li, Y., and Sarkar, F.H. (2012). Inactivation of AR and Notch-1 signaling by miR-34a attenuates prostate cancer aggressiveness. *Am. J. Transl. Res.* 4, 432–442.
  52. Yerukala Sathipati, S., Tsai, M.-J., Carter, T., Allaire, P., Shukla, S.K., Beheshti, A., and Ho, S.-Y. (2022). Survival estimation in patients with stomach and esophageal carcinoma using miRNA expression profiles. *Comput. Struct. Biotechnol. J.* 20, 4490–4500.



**HGGA, Volume 4**

**Supplemental information**

**Artificial intelligence-driven pan-cancer analysis  
reveals miRNA signatures for cancer stage prediction**

**Srinivasulu Yerukala Sathipati, Ming-Ju Tsai, Sanjay K. Shukla, and Shinn-Ying Ho**

# Supplementary information

## Supplementary Figures

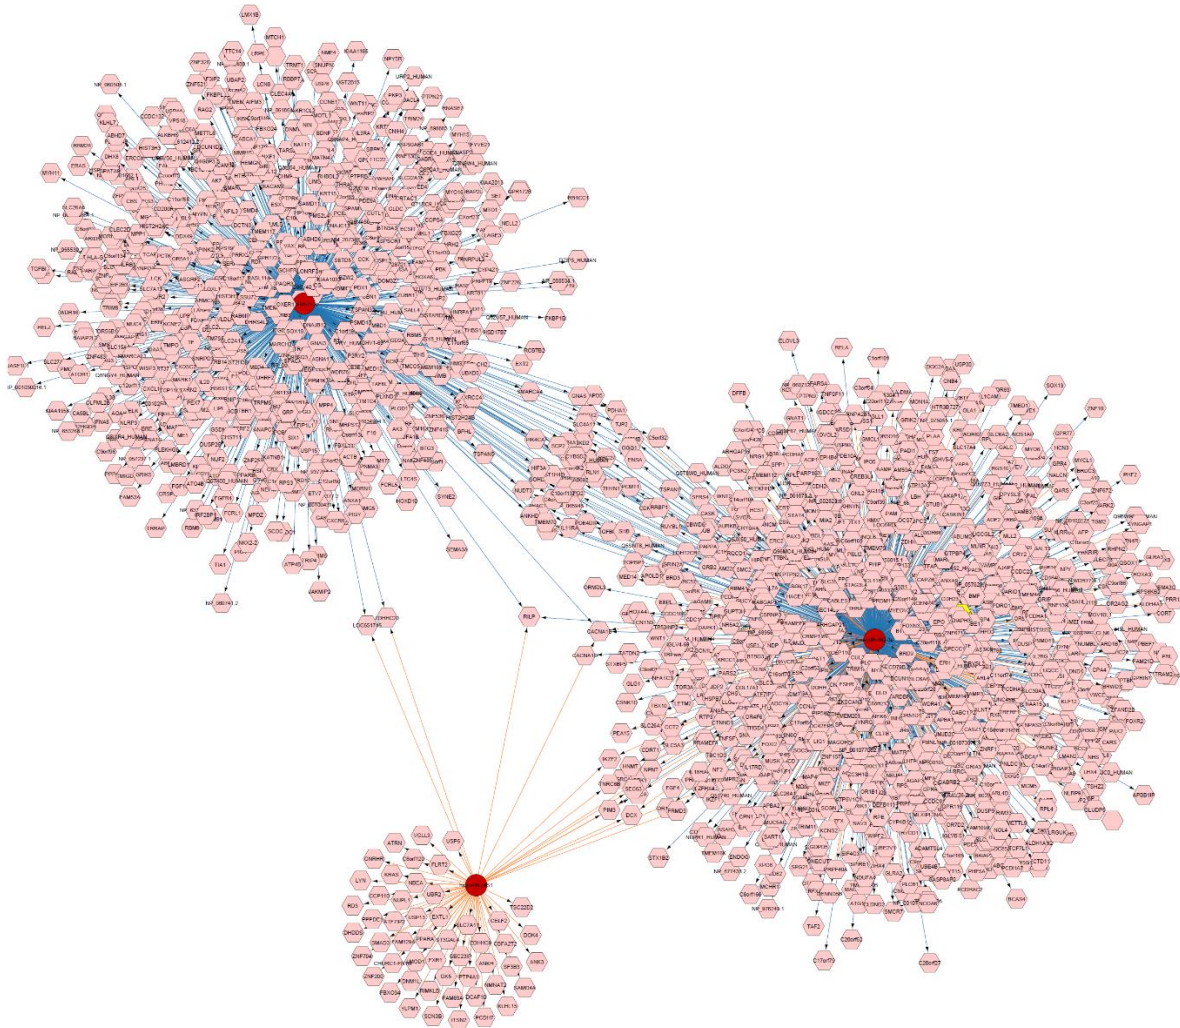

**Supplementary Figure S1.** Three miRNAs and corresponding target genes predicted using MicroCosm, miRTar base, and TargetScan. In this network microRNAs and target genes are defined as red circles and pink rounded hexagons respectively. The predicted microRNA-Target interactions are visualized in blue and in orange color.

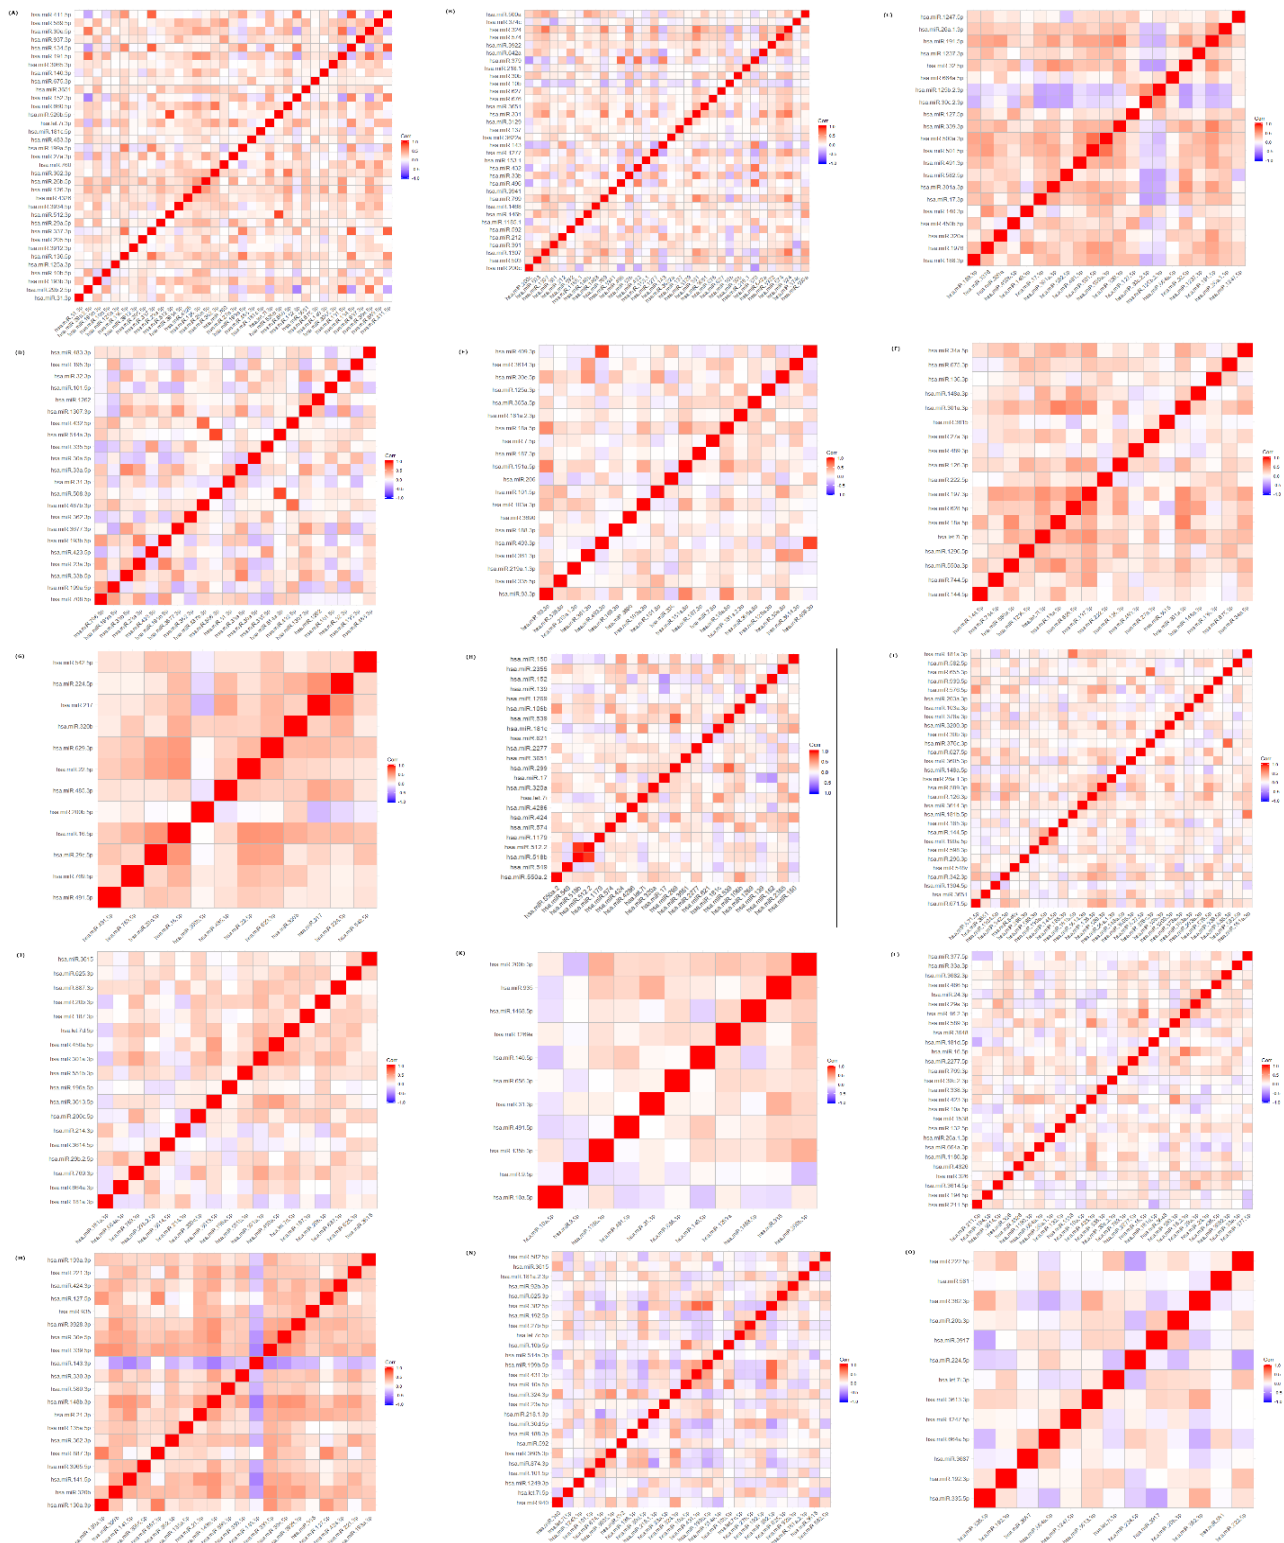

**Supplementary Figure S2.** Co-expression analysis of miRNA signatures across 15 cancers. (A) BLCA, (B) BRCA, (C) COAD, (D) ESCA, (E) HNSC, (F) KIRC, (G) KIRP, (H) LIHCC, (I) LUAD, (J) LUSC, (K) READ, (L) SKCM, (M) STAD, (N) THCA, and (O) UVM.

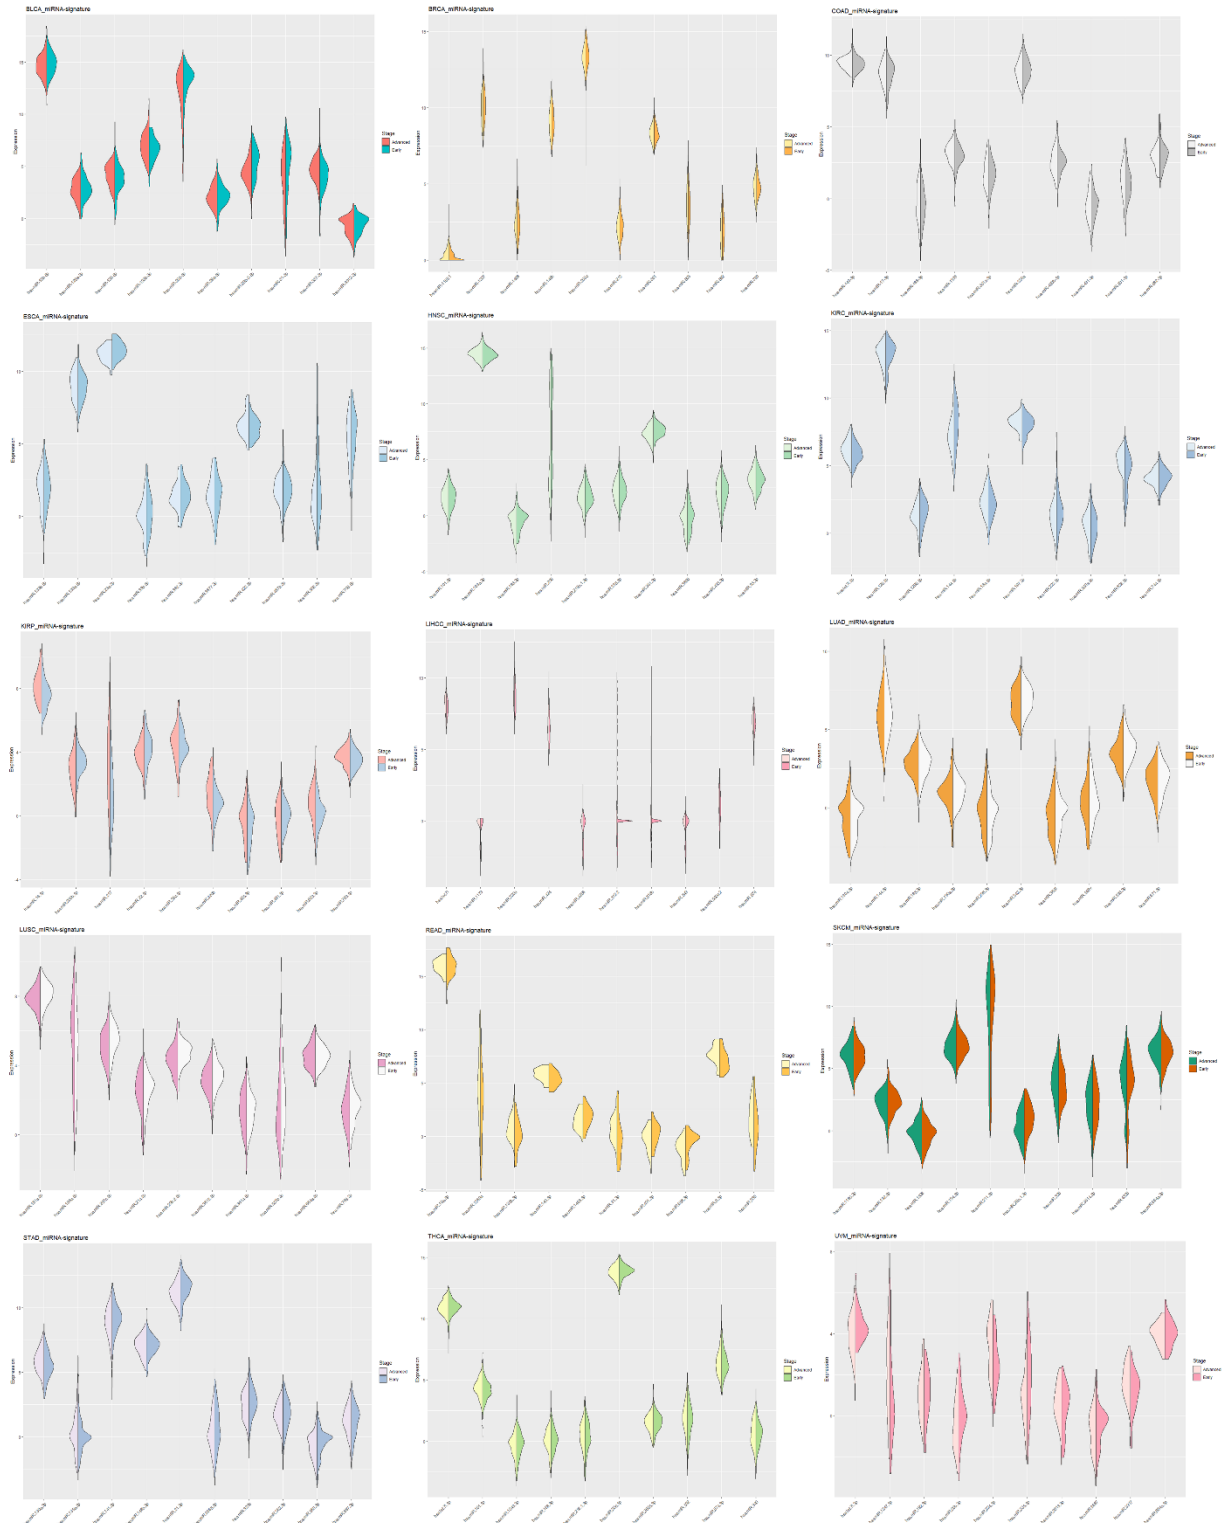

**Supplementary Figure S3. Expression difference analysis of the miRNA signatures across 15 cancers.** Relative expression differences of the miRNA signatures between early and advanced stages across cancers.



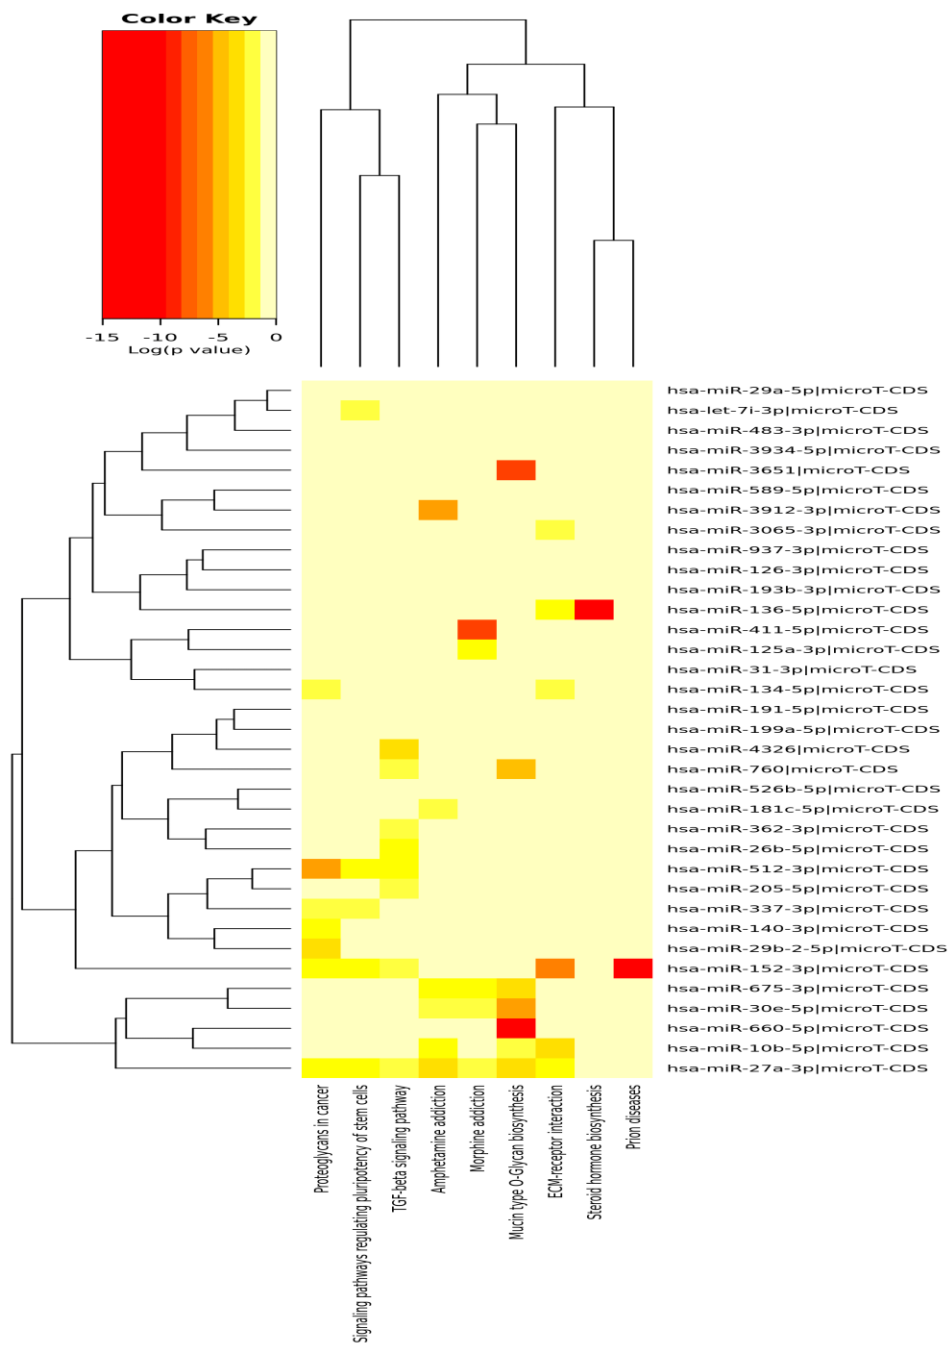

**Supplementary Figure S4.1.** KEGG pathway enrichment analysis of miRNA signatures in BLCA

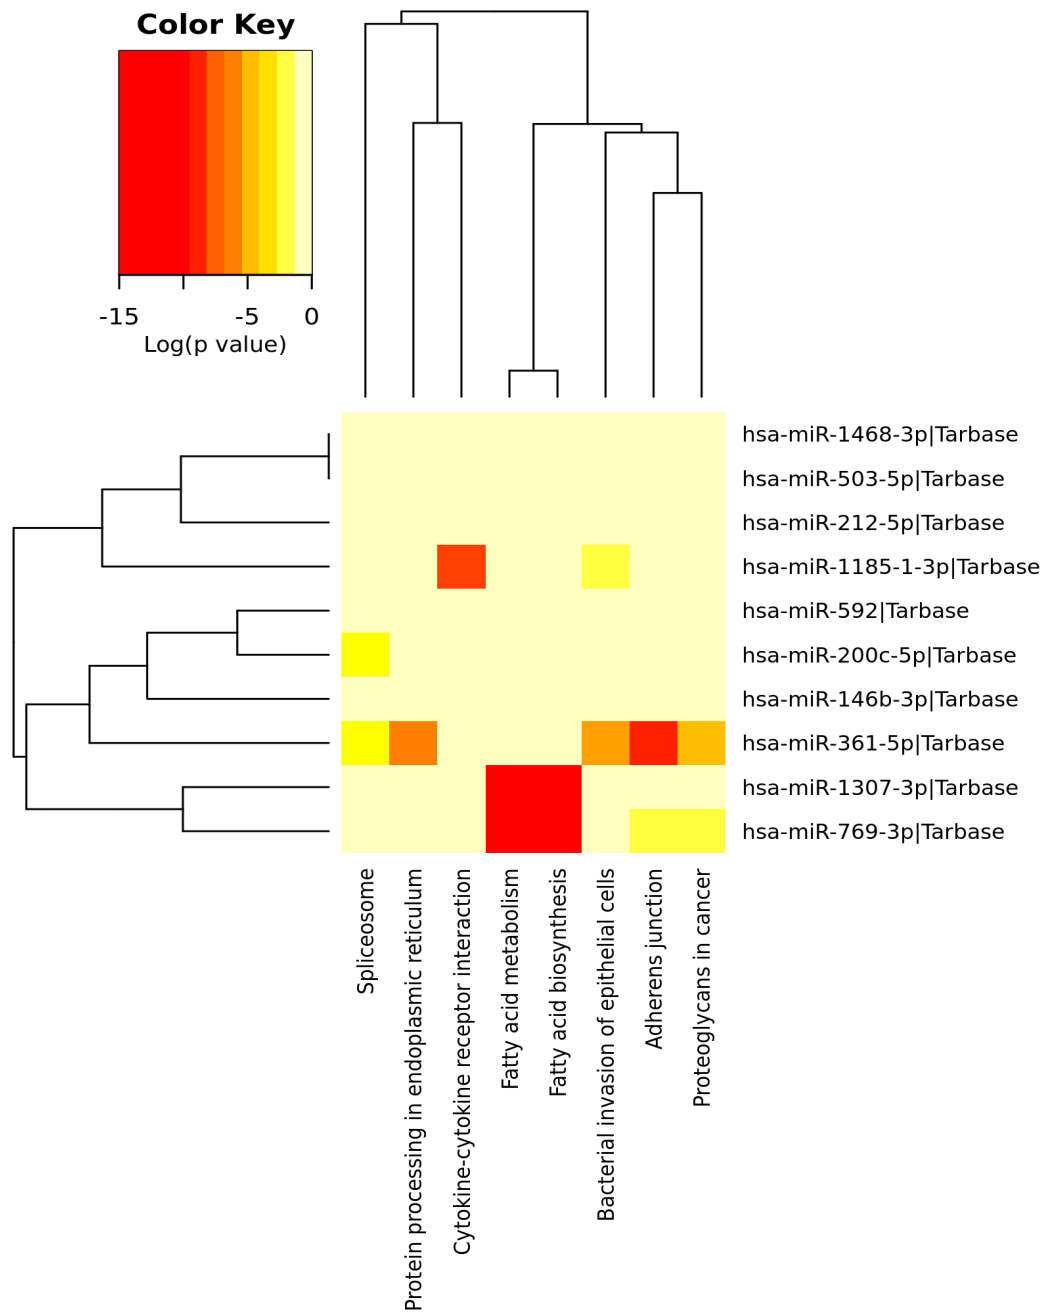

**Supplementary Figure S4.2.** KEGG pathway enrichment analysis of miRNA signatures in BRCA

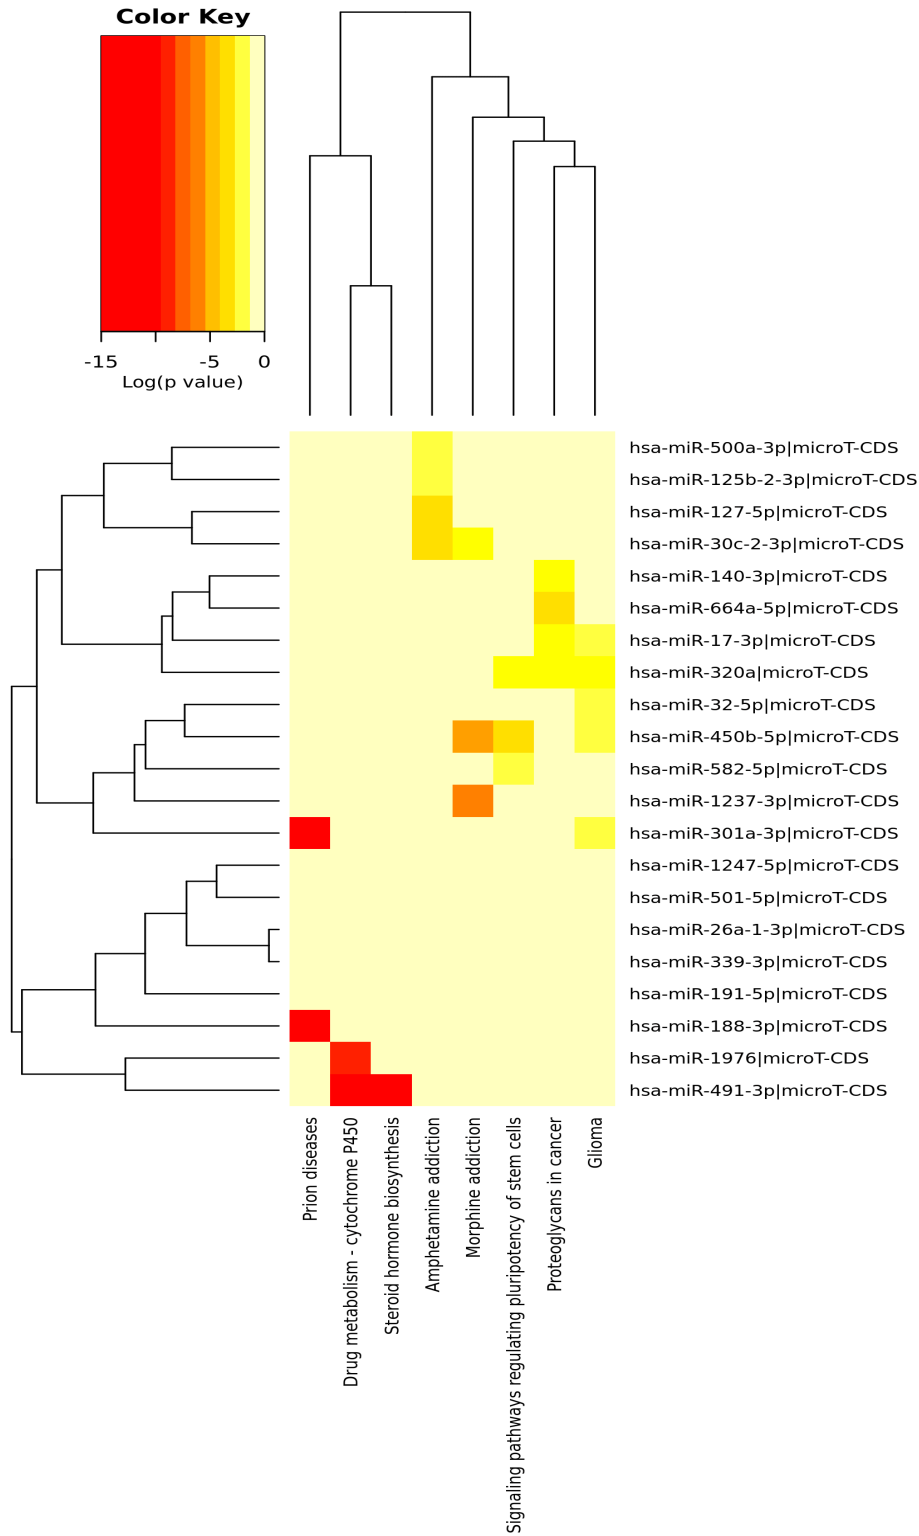

**Supplementary Figure S4.3.** KEGG pathway enrichment analysis of miRNA signatures in COAD

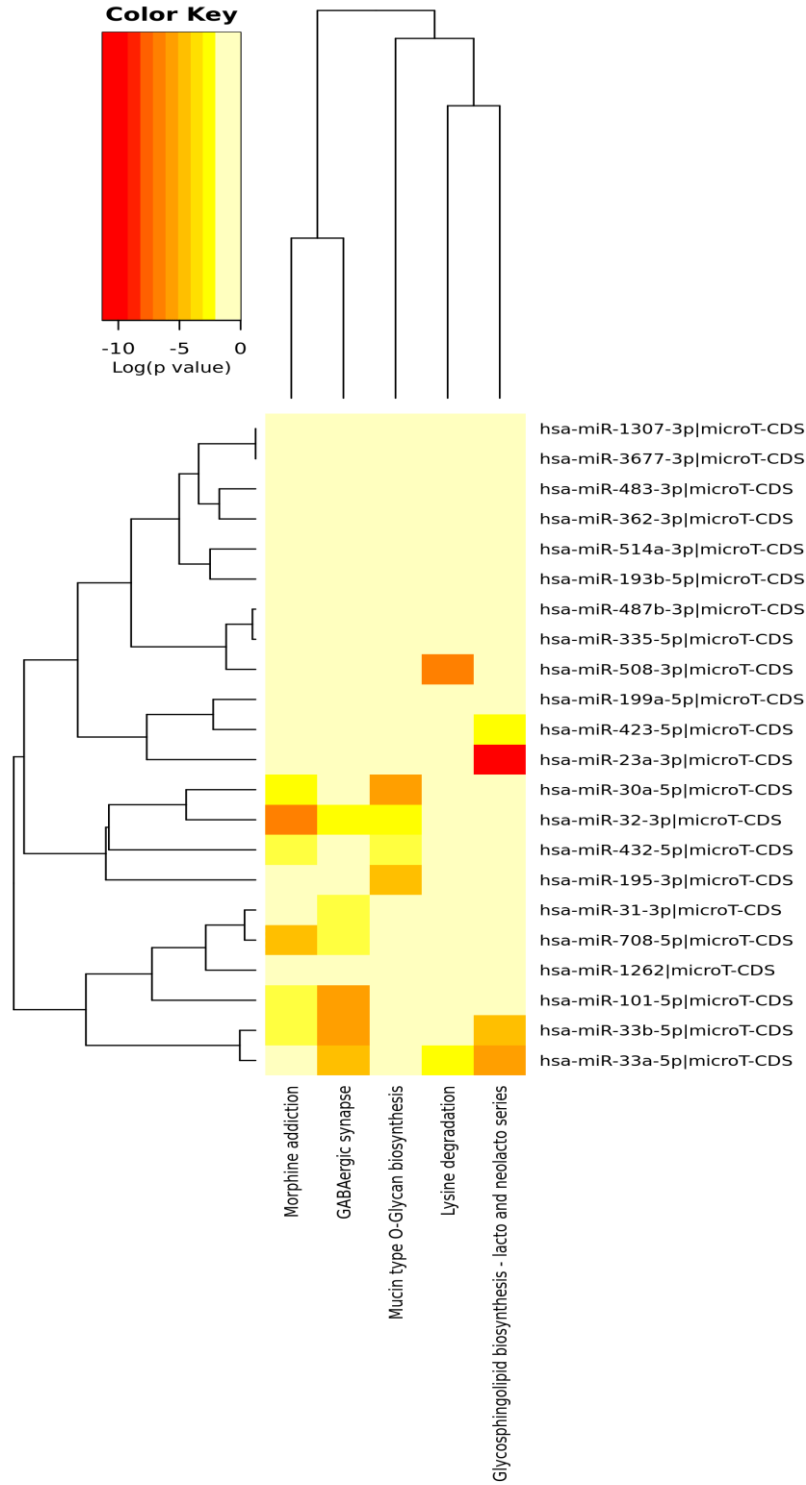

**Supplementary Figure S4.4.** KEGG pathway enrichment analysis of miRNA signatures in ESCA



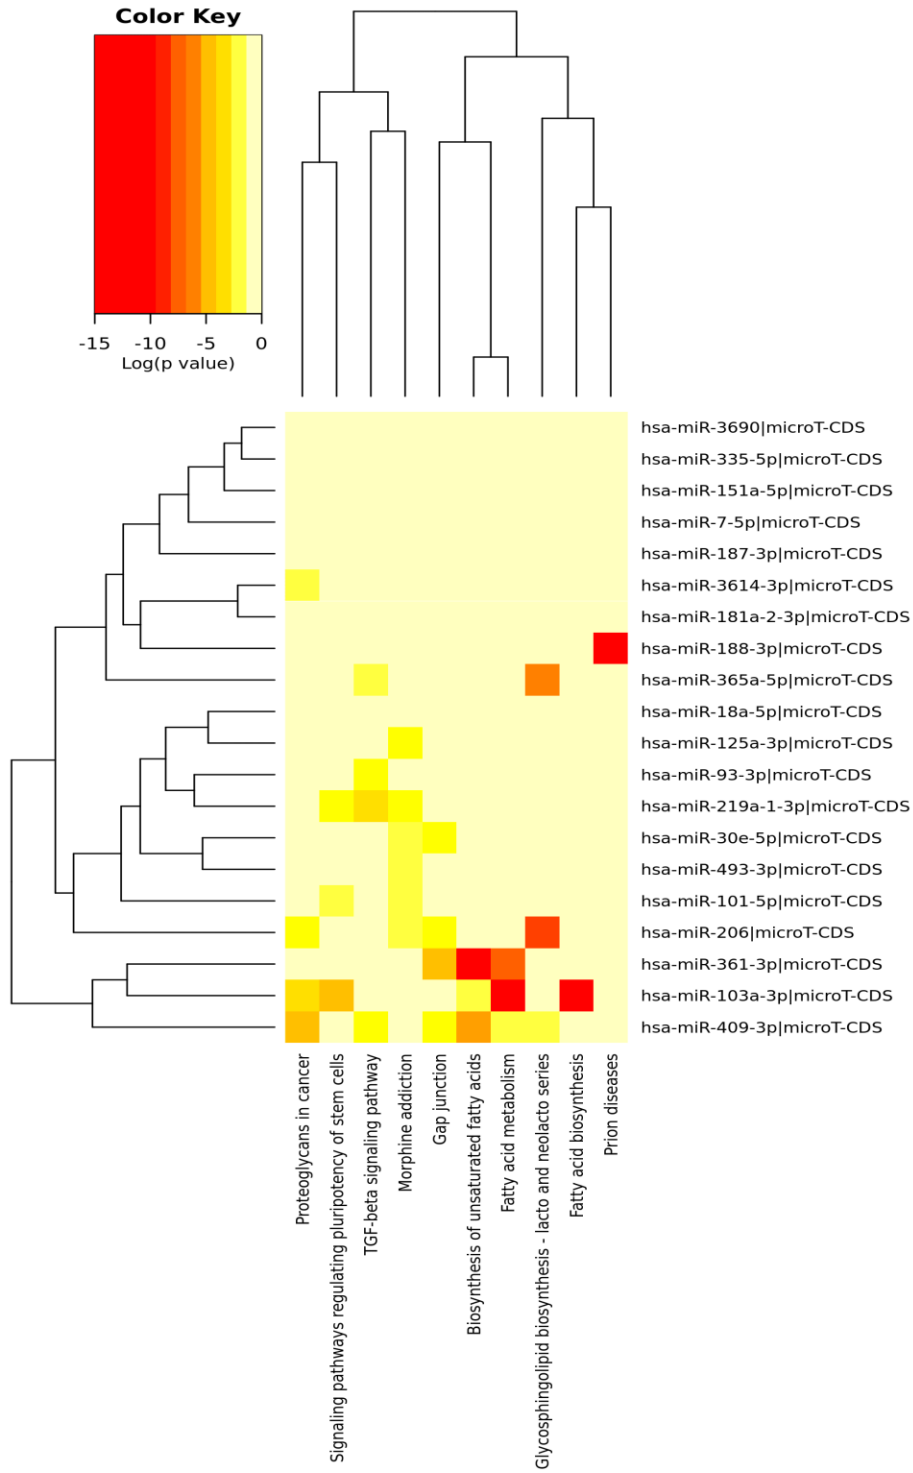

**Supplementary Figure S4.5.** KEGG pathway enrichment analysis of miRNA signatures in HNSC

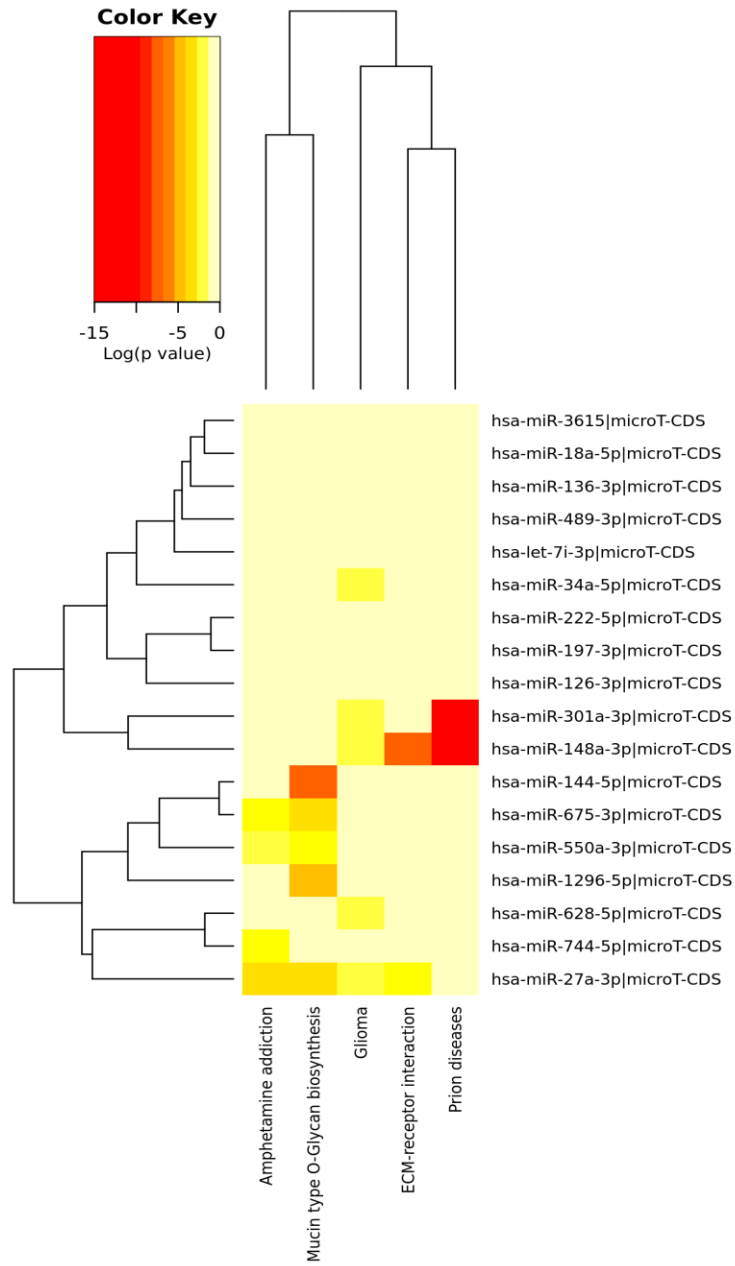

**Supplementary Figure S4.6.** KEGG pathway enrichment analysis of miRNA signatures in KIRC

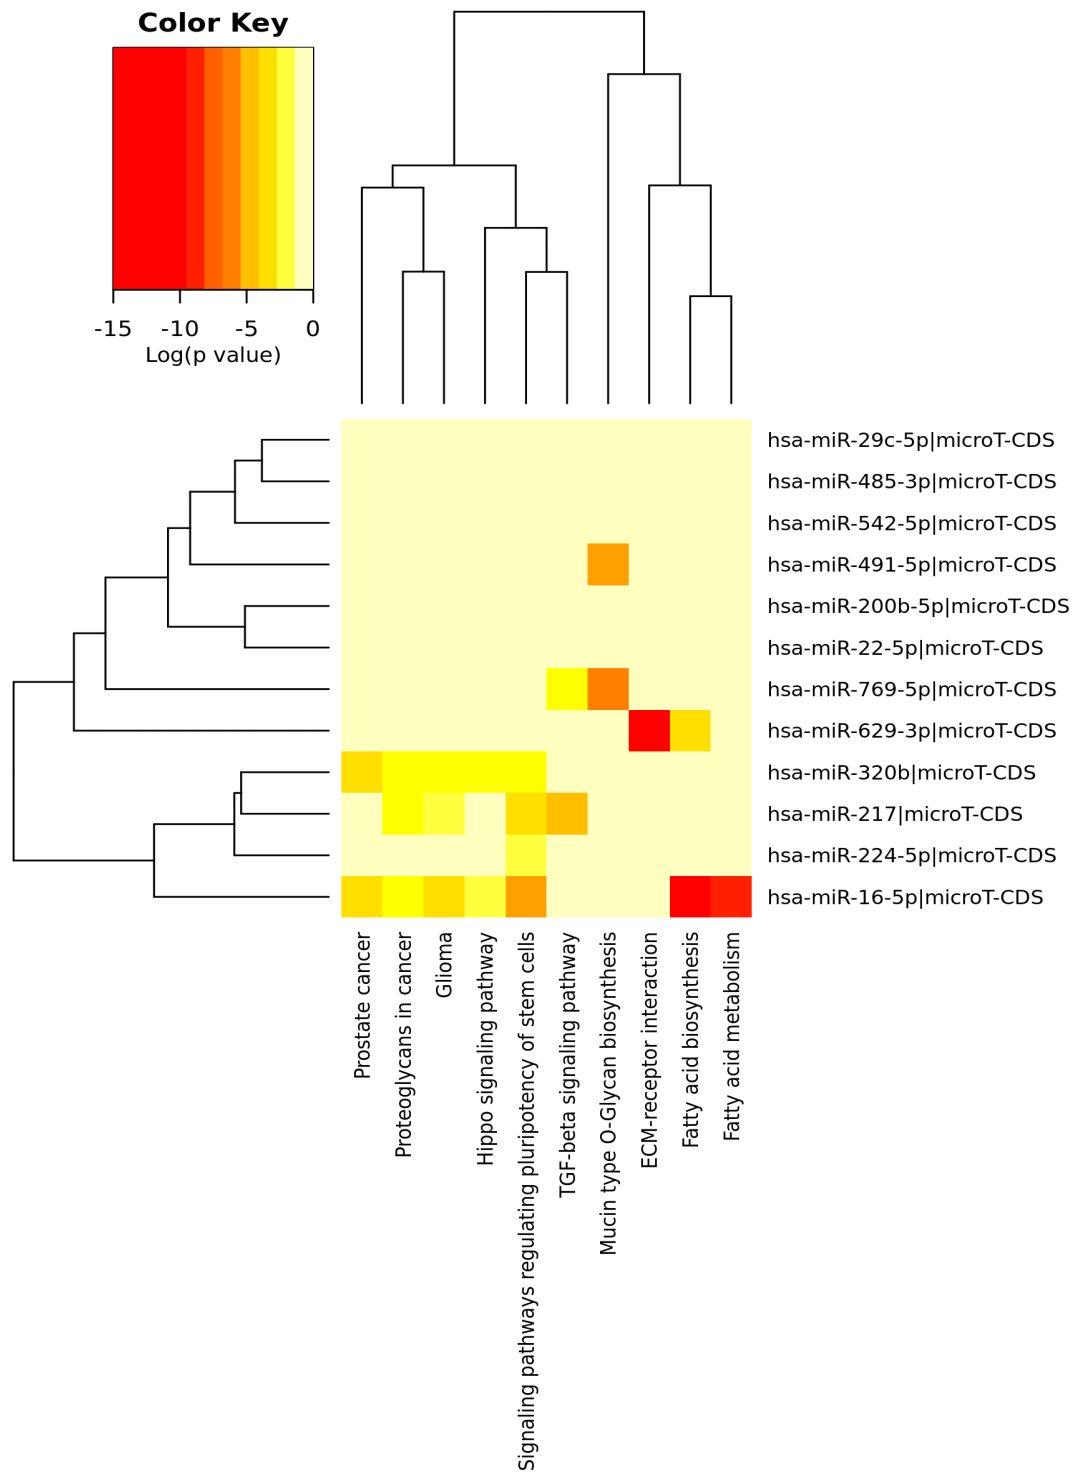

**Supplementary Figure S4.7.** KEGG pathway enrichment analysis of miRNA signatures in KIRP

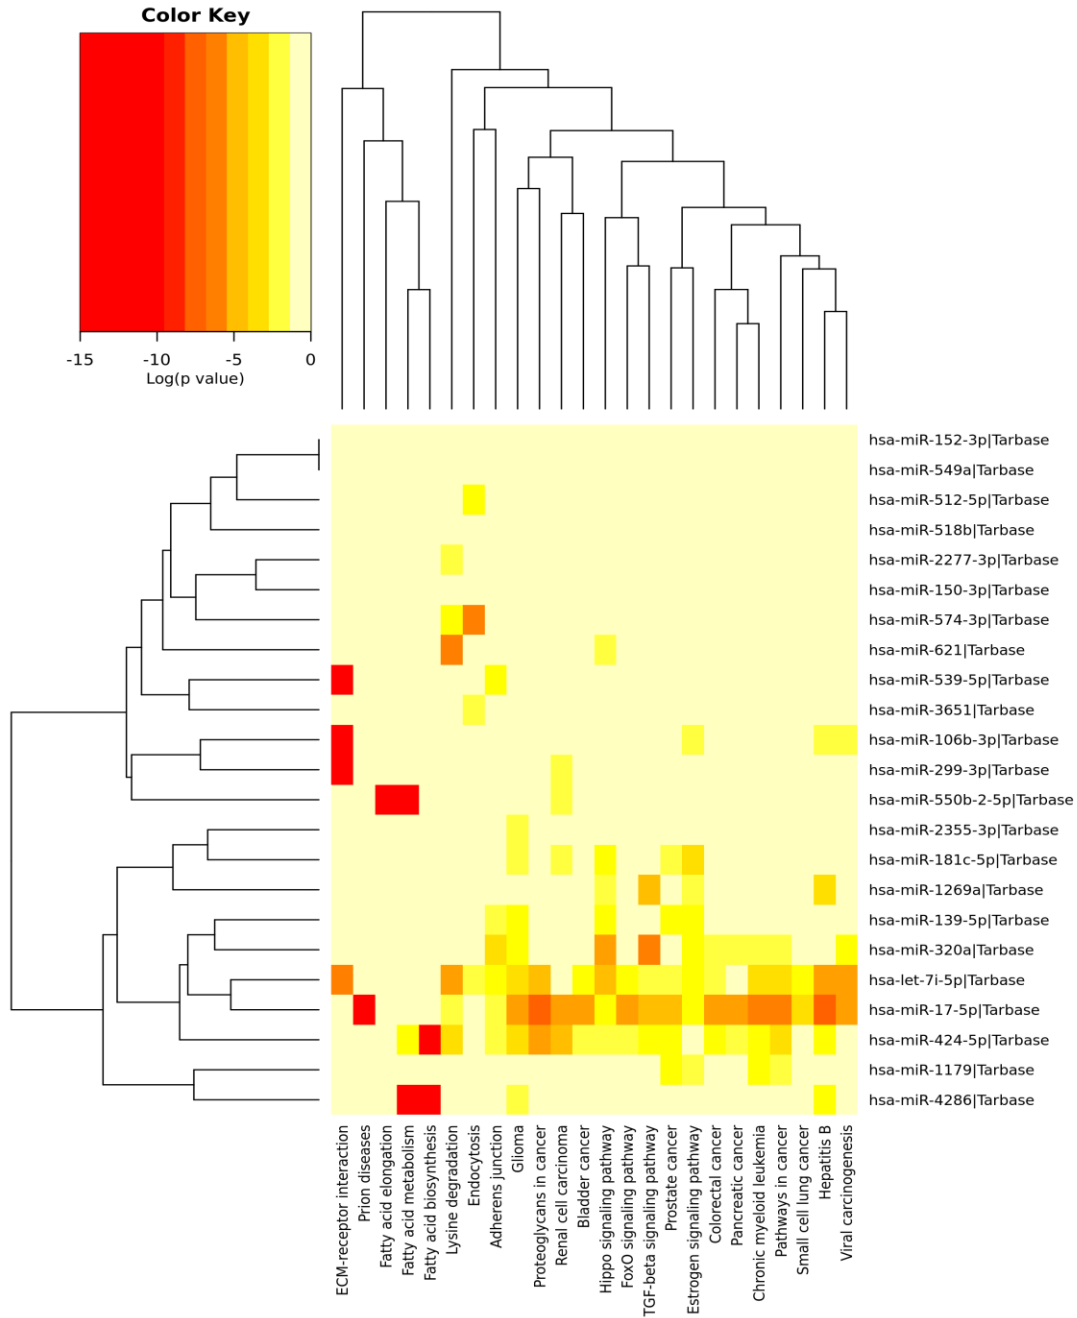

**Supplementary Figure S4.8.** KEGG pathway enrichment analysis of miRNA signatures in LIHC



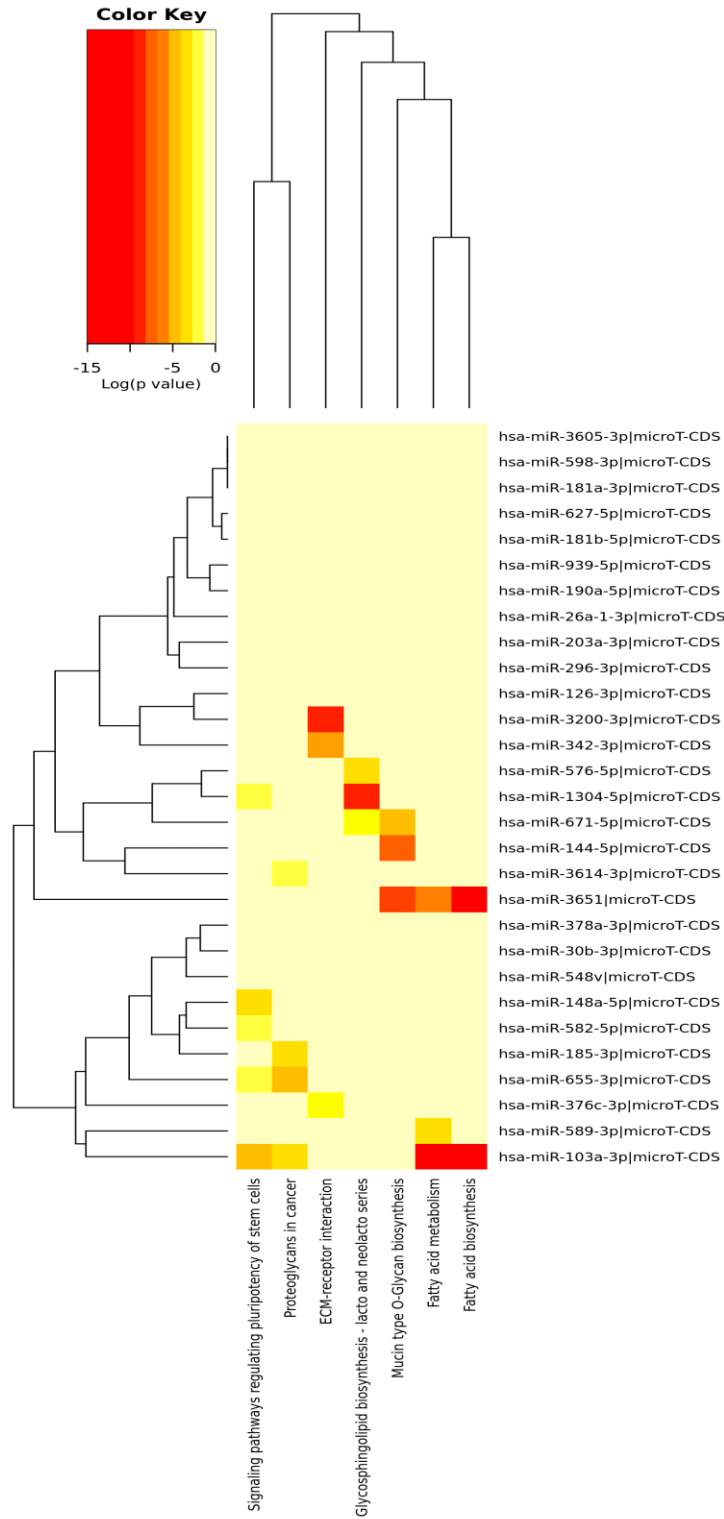

**Supplementary Figure S4.9.** KEGG pathway enrichment analysis of miRNA signatures in LUAD

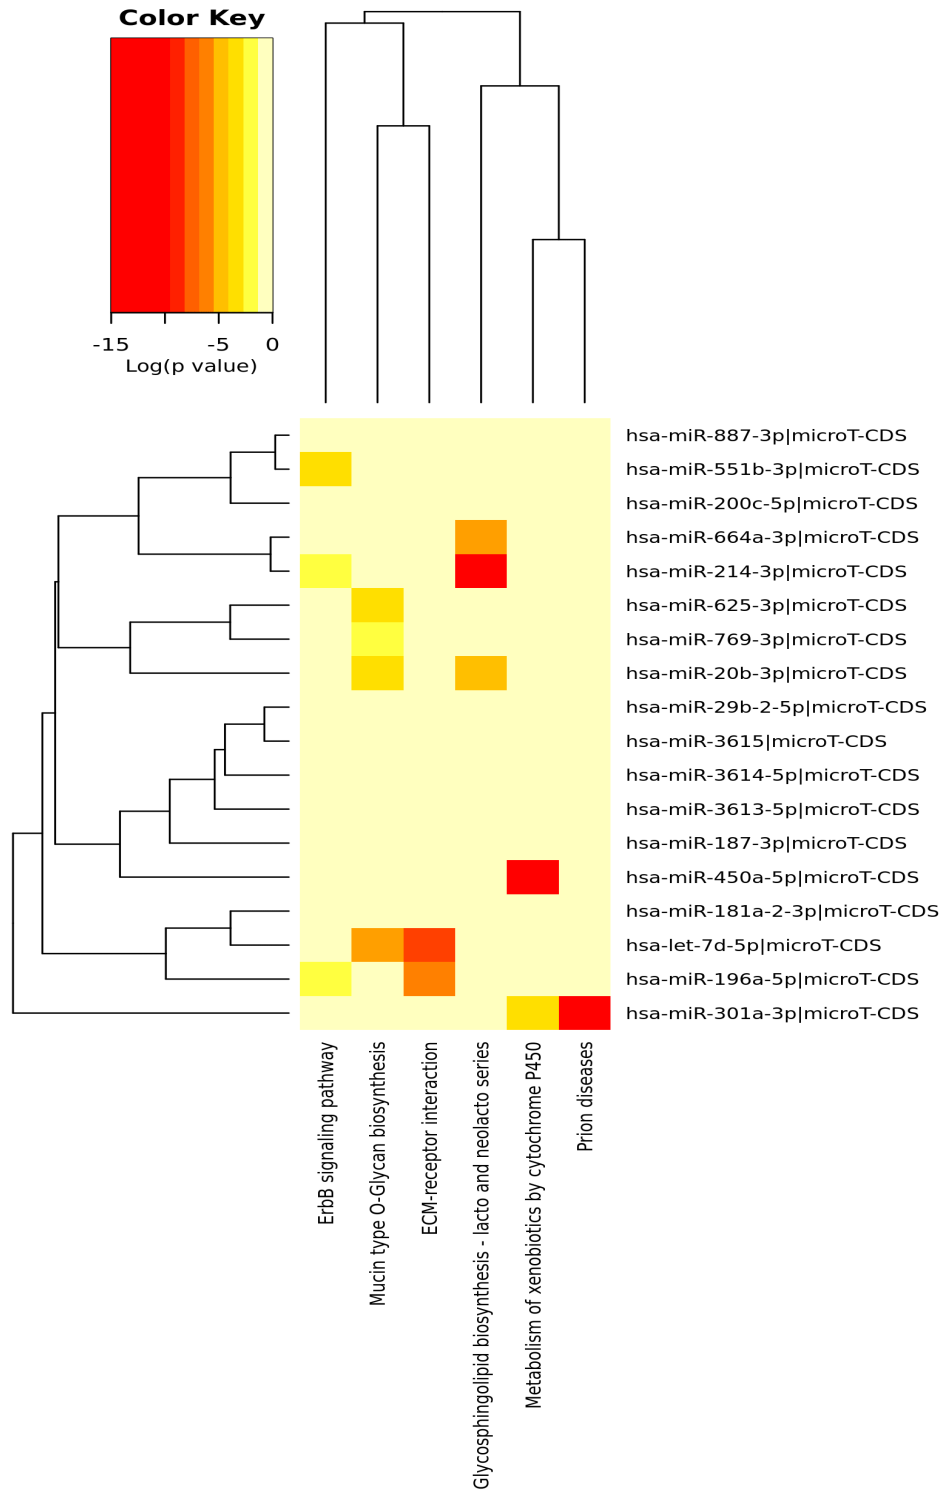

**Supplementary Figure S4.10.** KEGG pathway enrichment analysis of miRNA signatures in LUSC

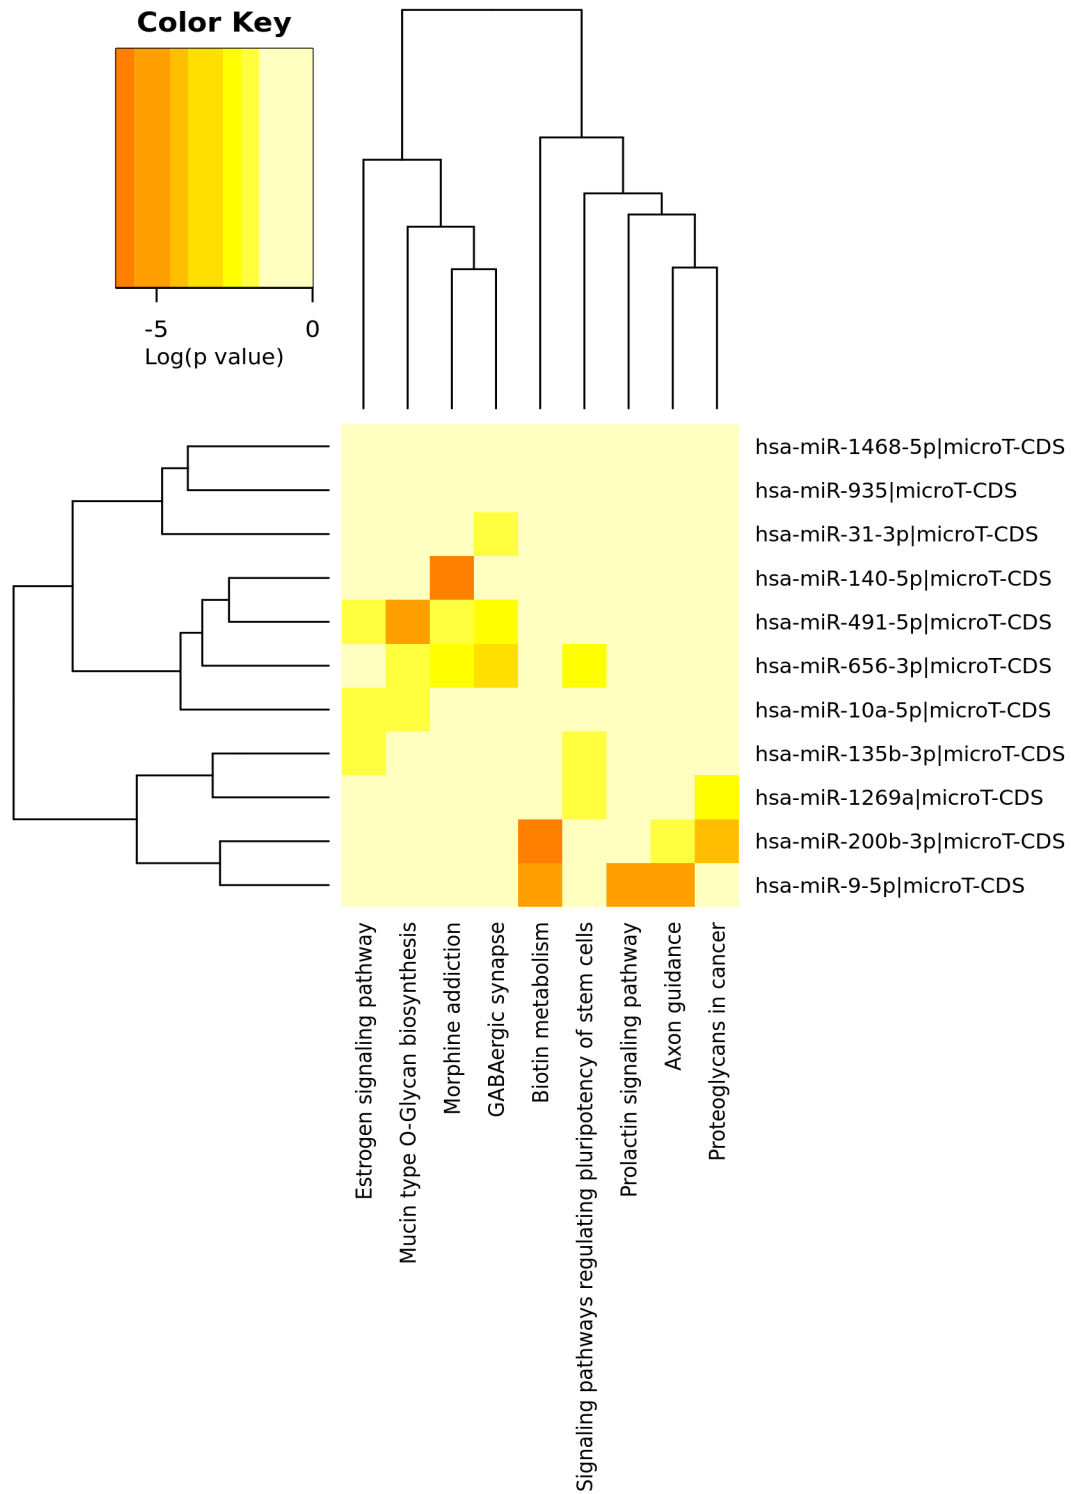

**Supplementary Figure S4.11.** KEGG pathway enrichment analysis of miRNA signatures in READ

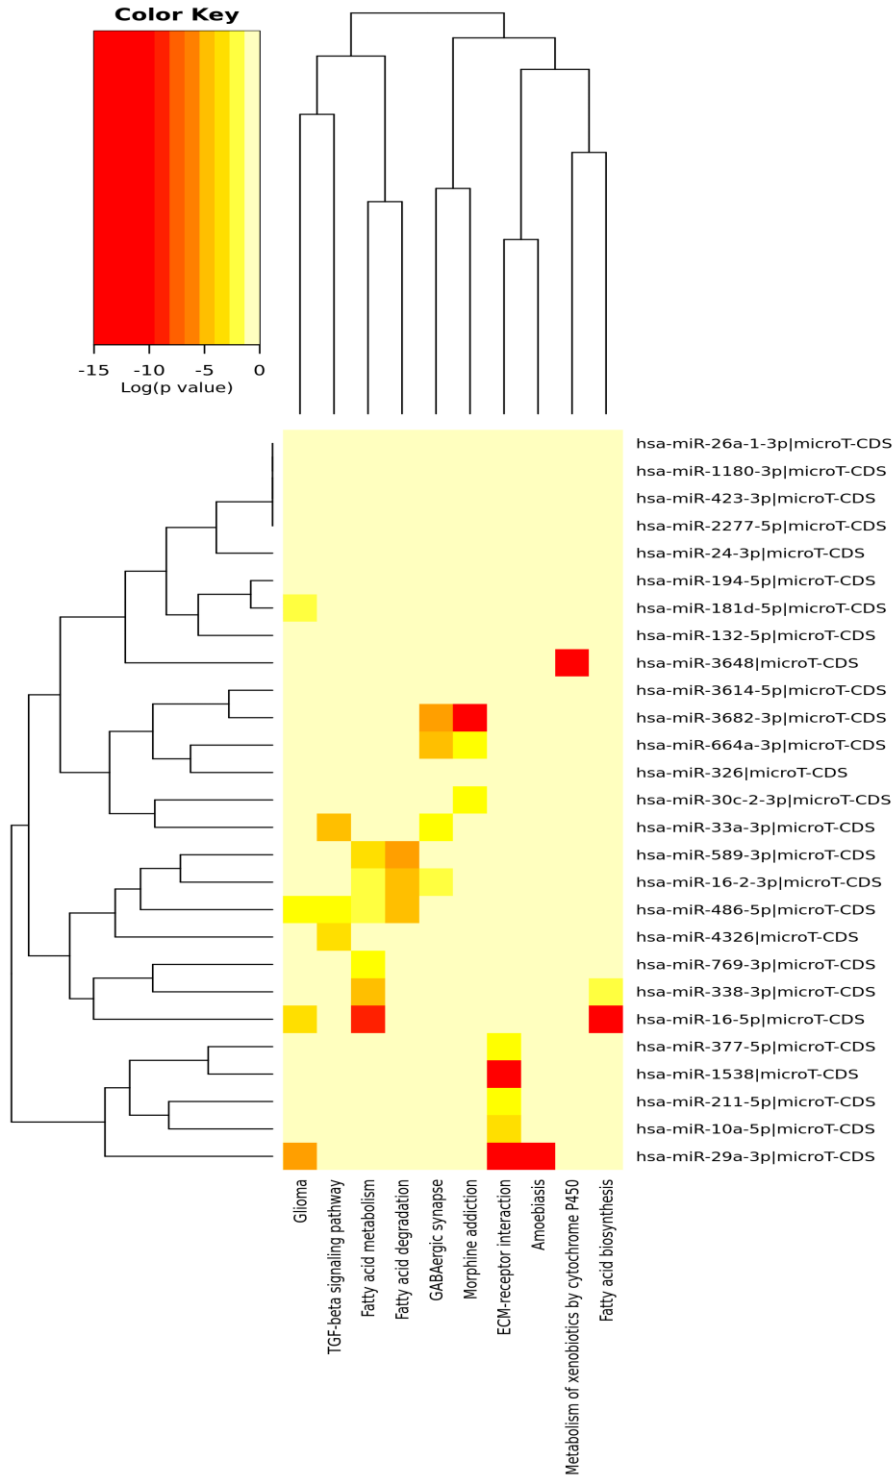

**Supplementary Figure S4.12.** KEGG pathway enrichment analysis of miRNA signatures in SKCM



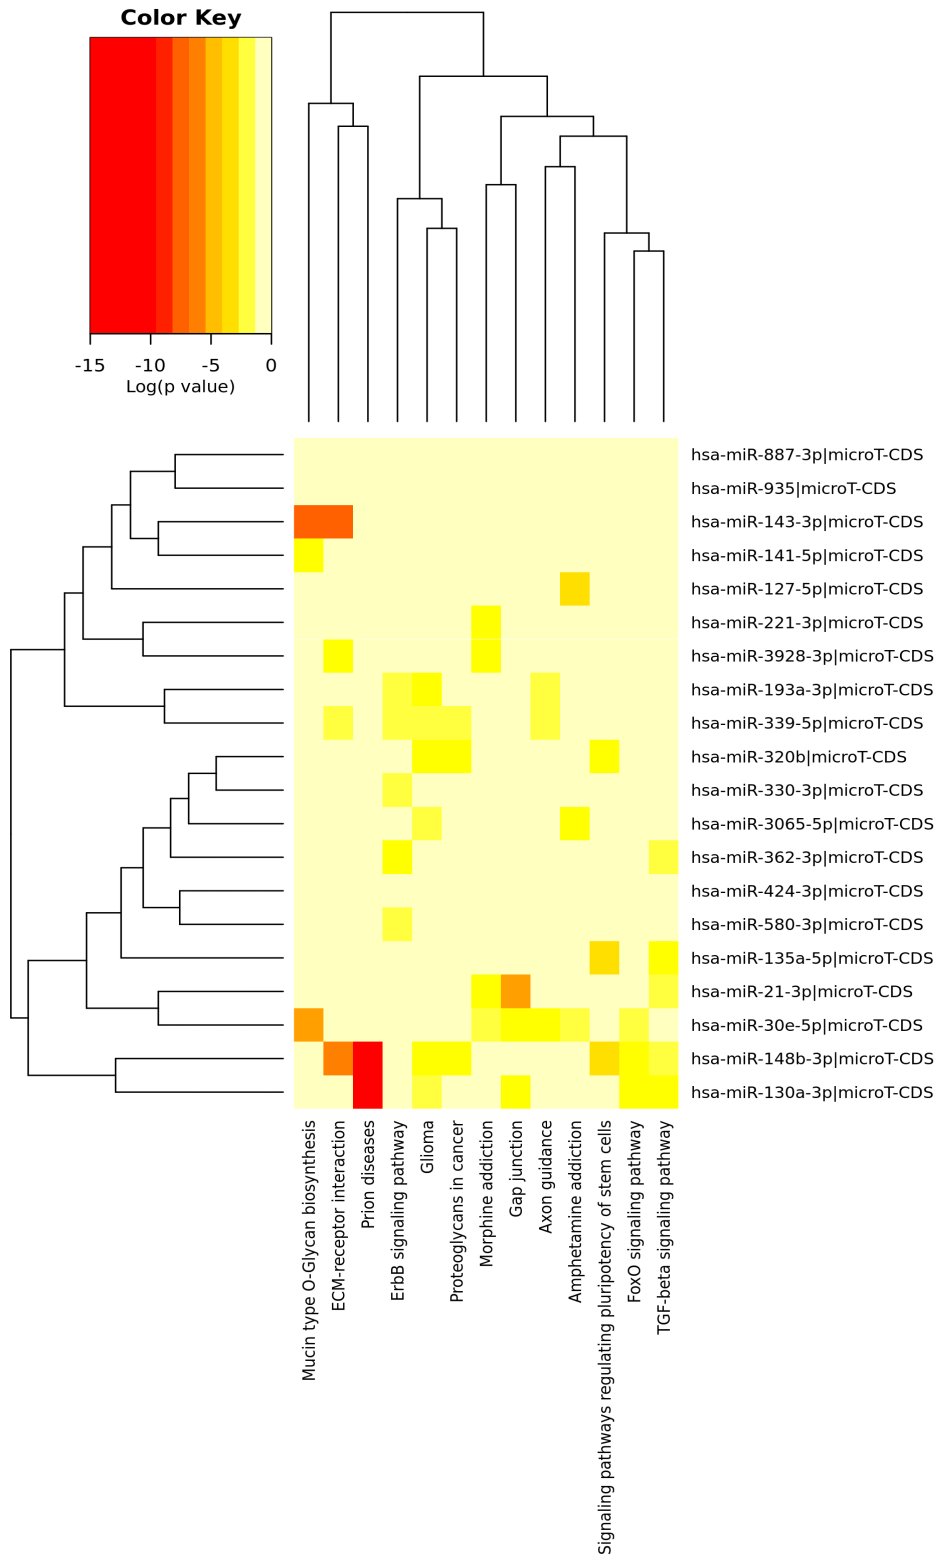

**Supplementary Figure S4.13.** KEGG pathway enrichment analysis of miRNA signatures in STAD

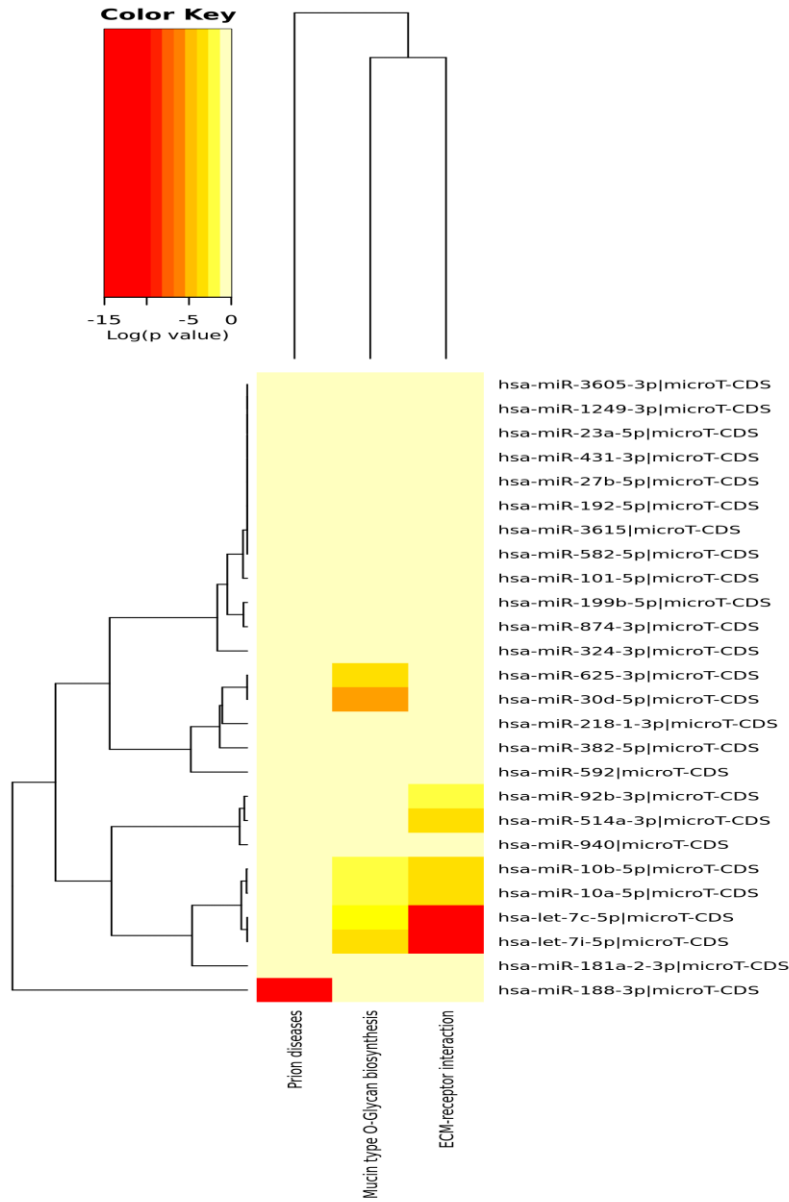

**Supplementary Figure S4.14.** KEGG pathway enrichment analysis of miRNA signatures in THCA

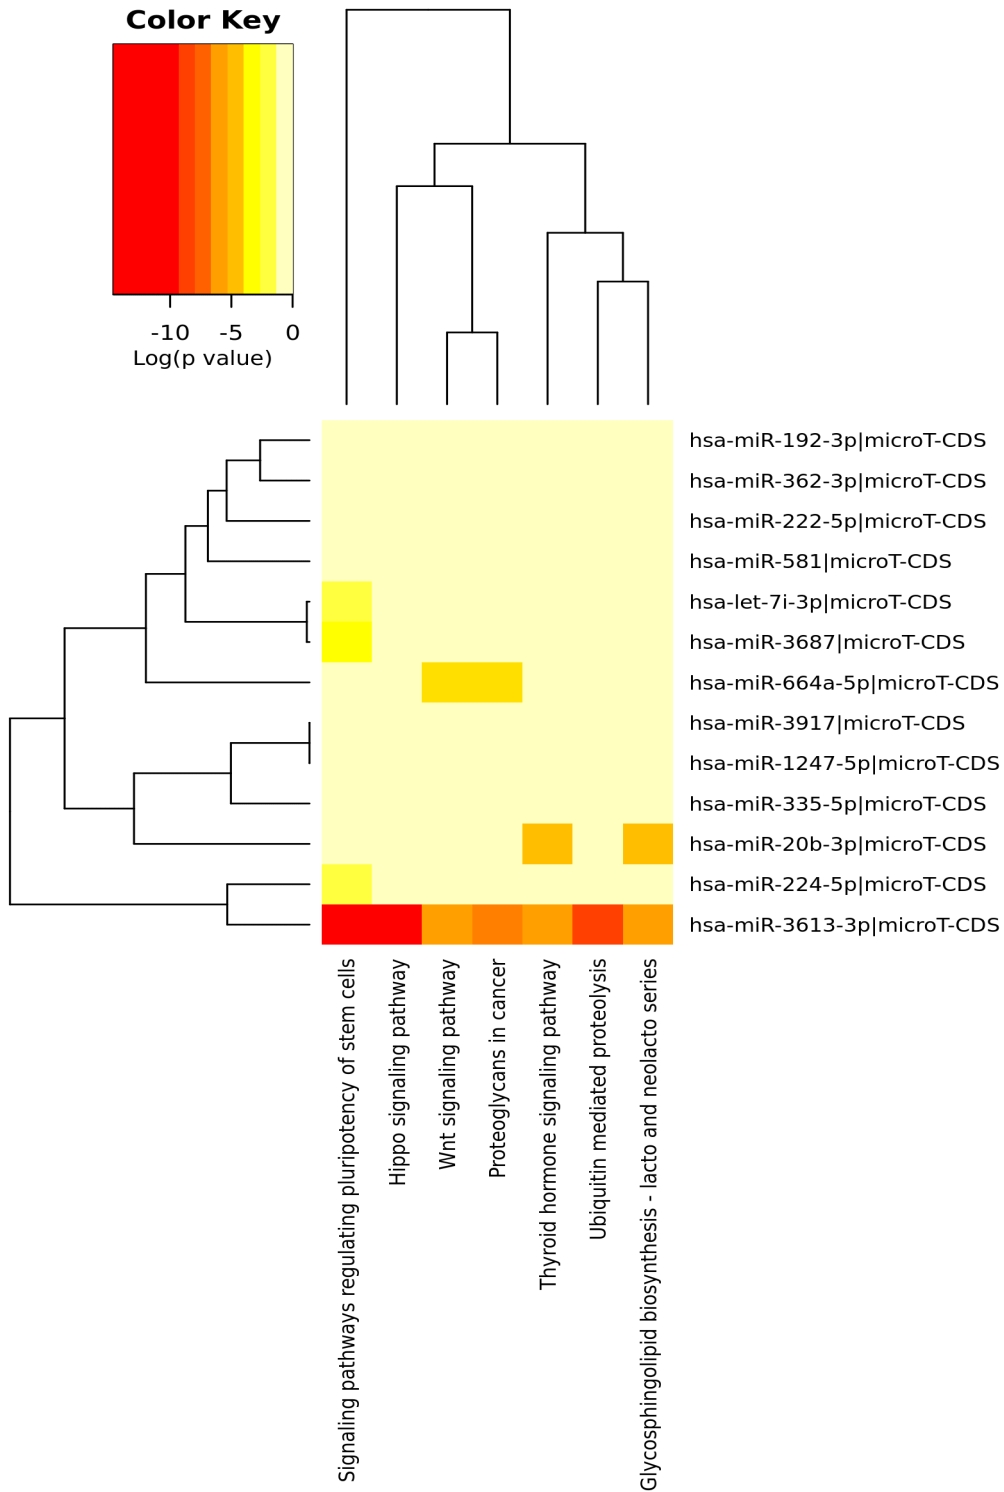

**Supplementary Figure S4.15.** KEGG pathway enrichment analysis of miRNA signatures in UVM

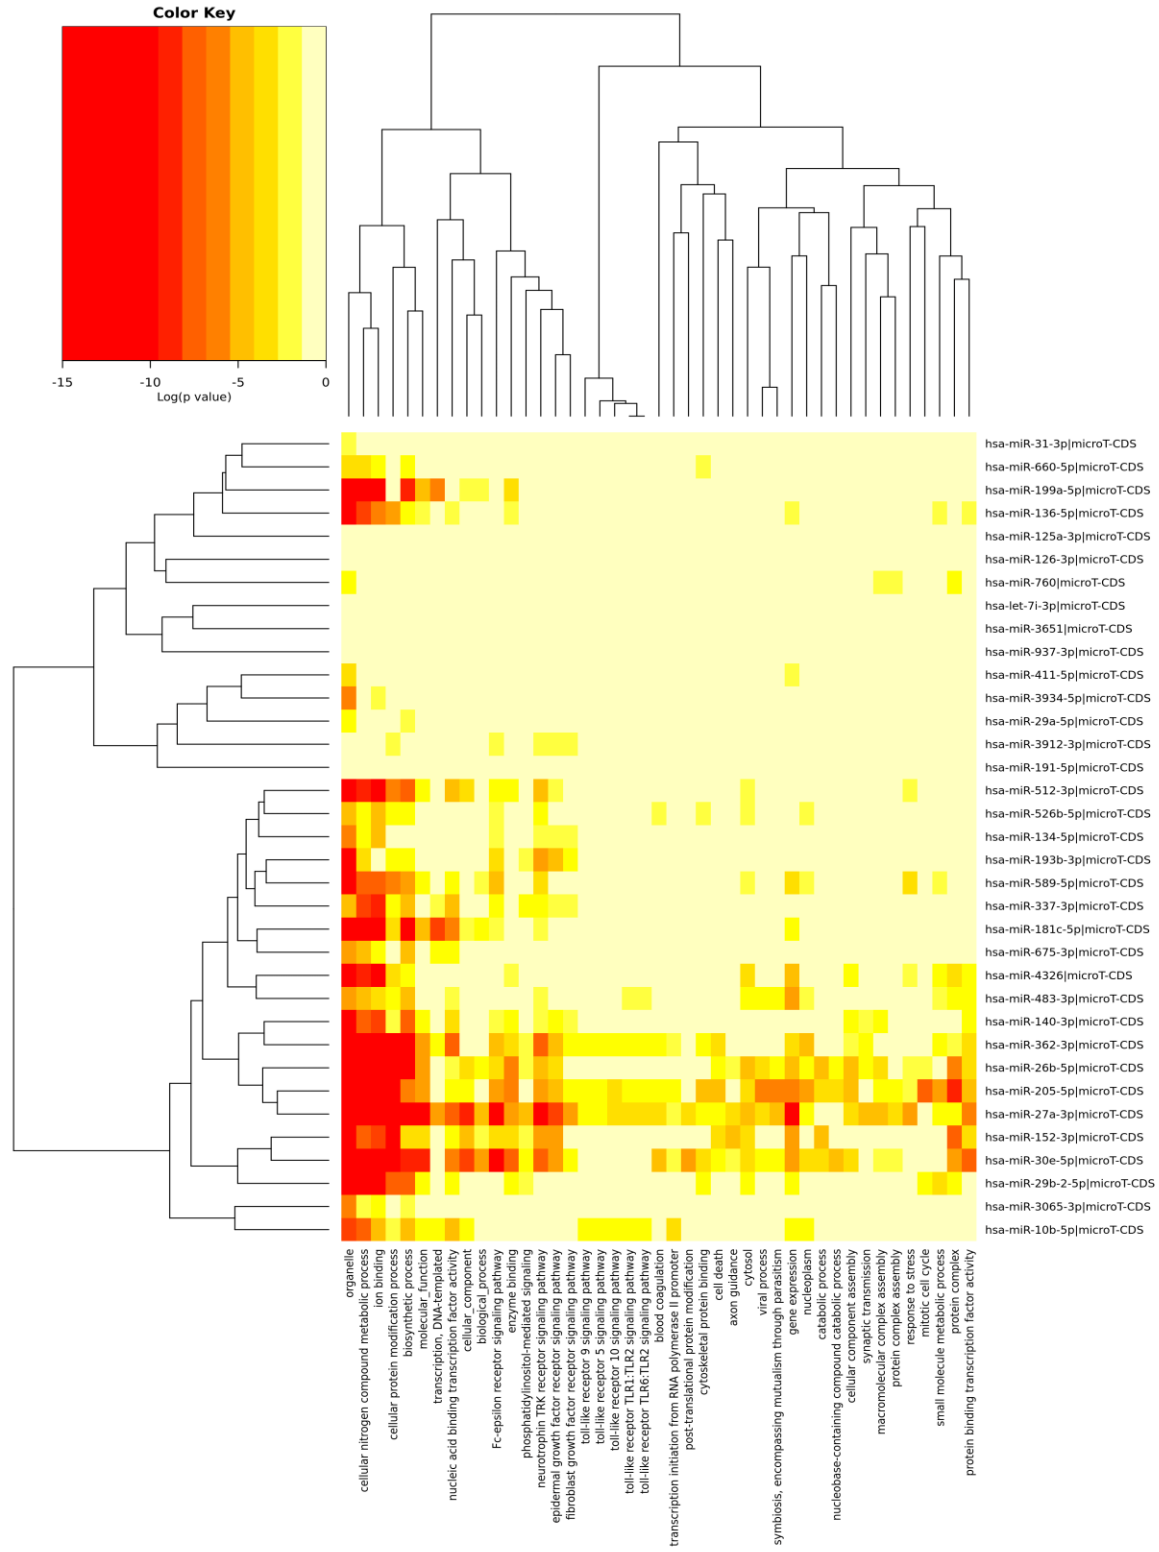

Supplementary Figure S5.1. GO category enrichment analysis of miRNA signatures in BLCA

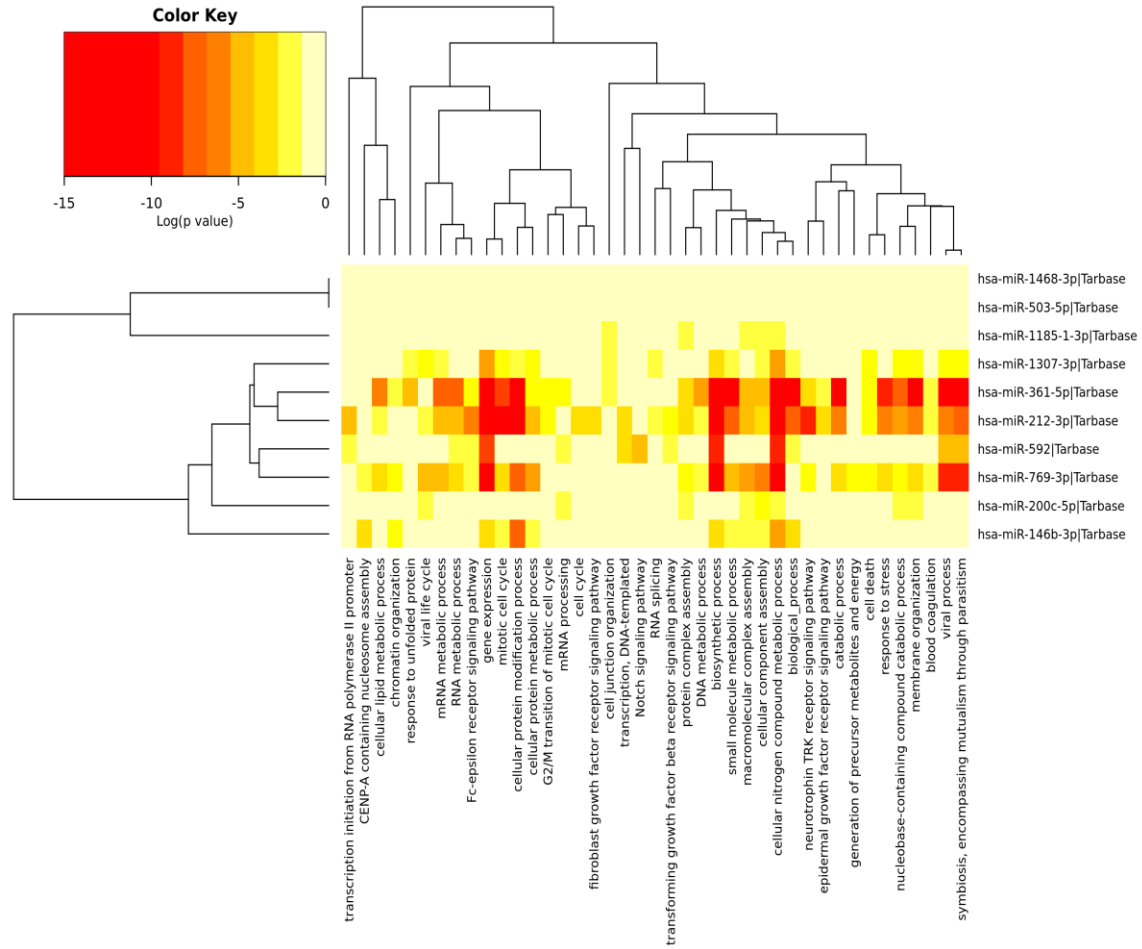

**Supplementary Figure S5.2.** GO category enrichment analysis of miRNA signatures in BRCA



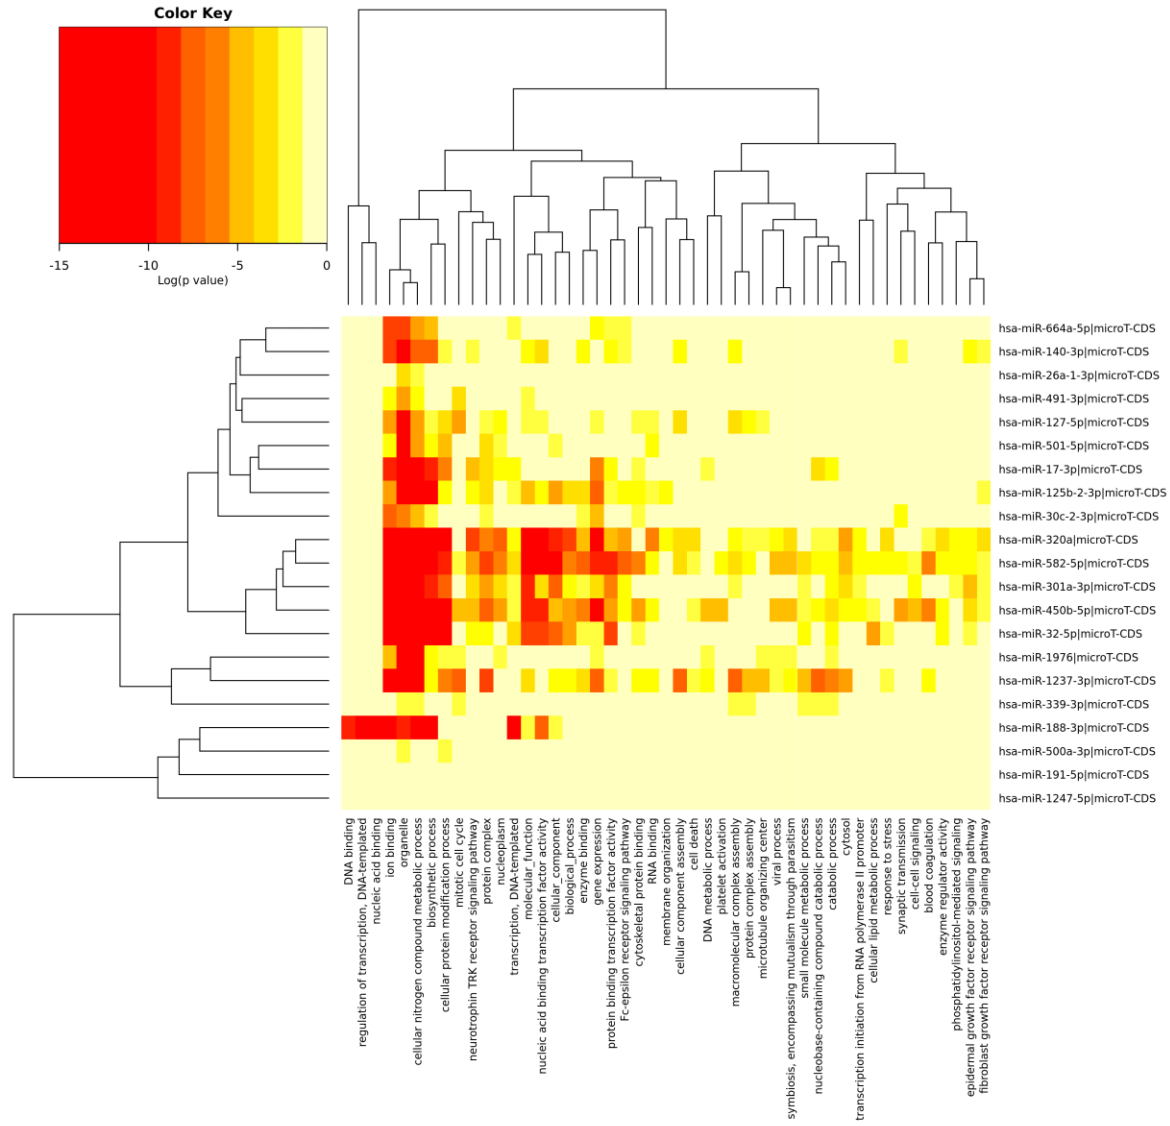

**Supplementary Figure S5.3.** GO category enrichment analysis of miRNA signatures in COAD

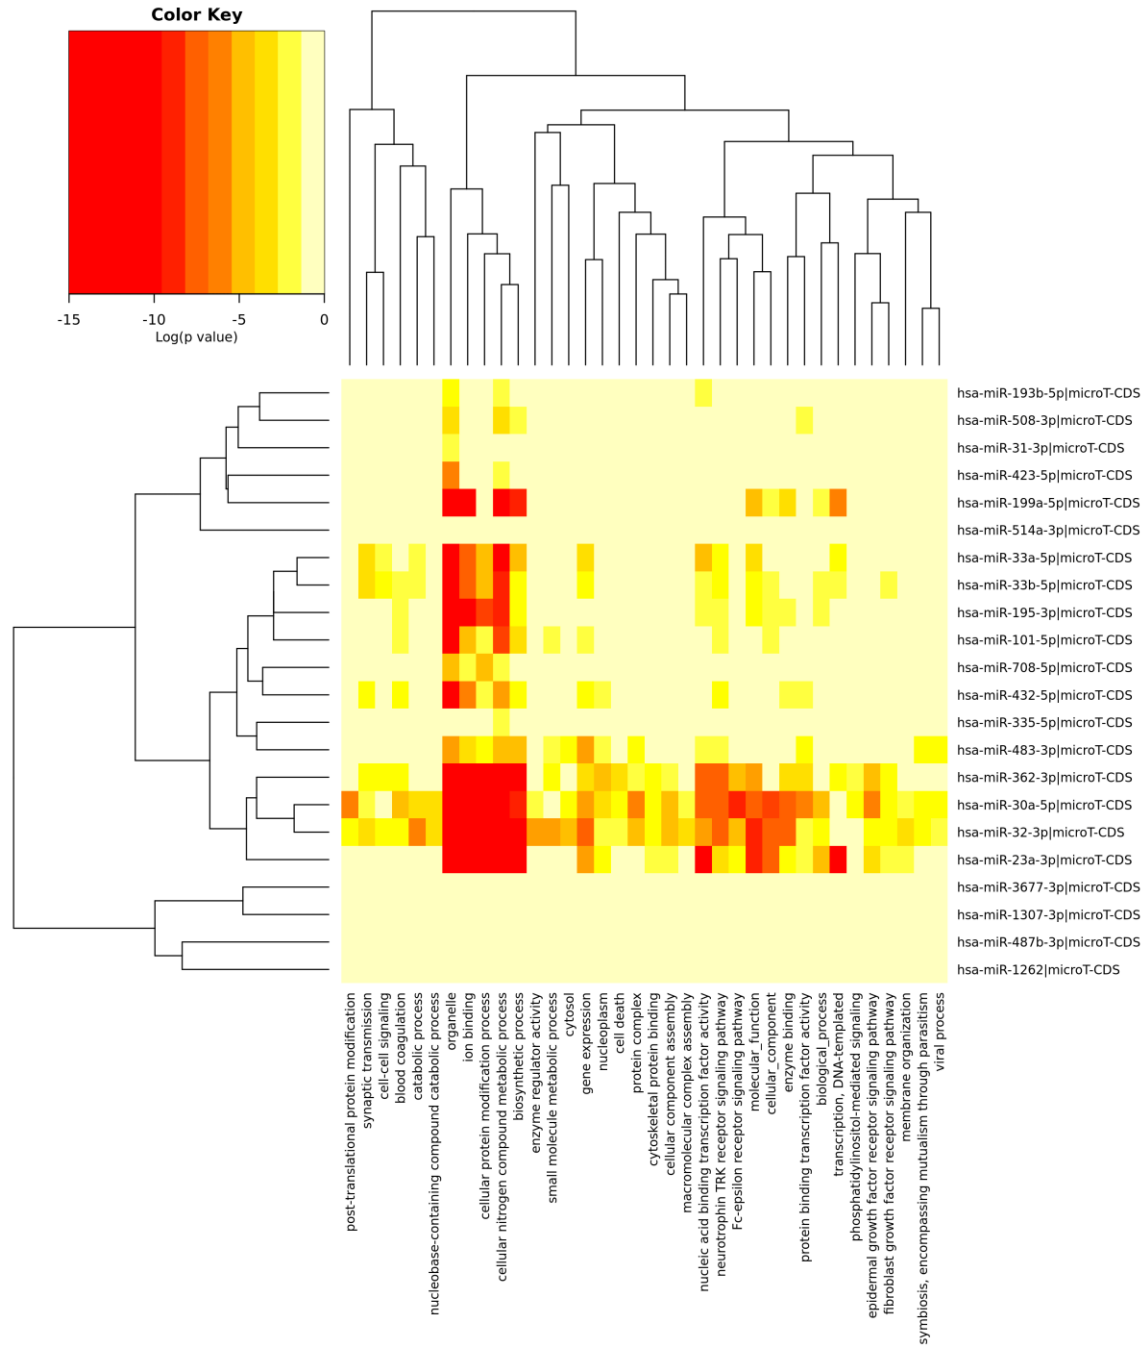

**Supplementary Figure S5.4.** GO category enrichment analysis of miRNA signatures in ESCA

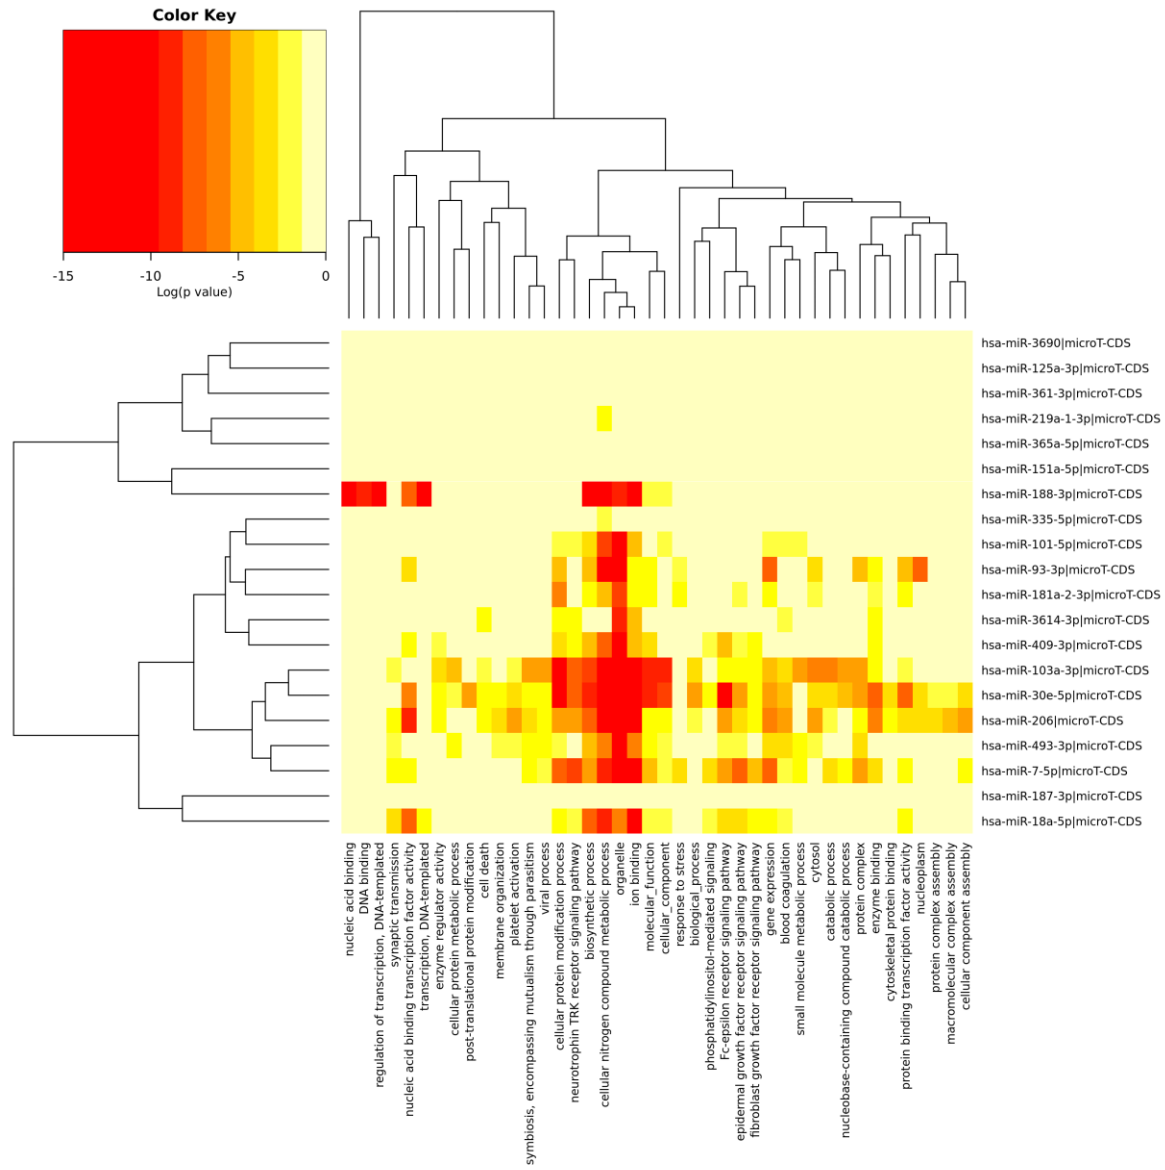

**Supplementary Figure S5.5.** GO category enrichment analysis of miRNA signatures in HNSC

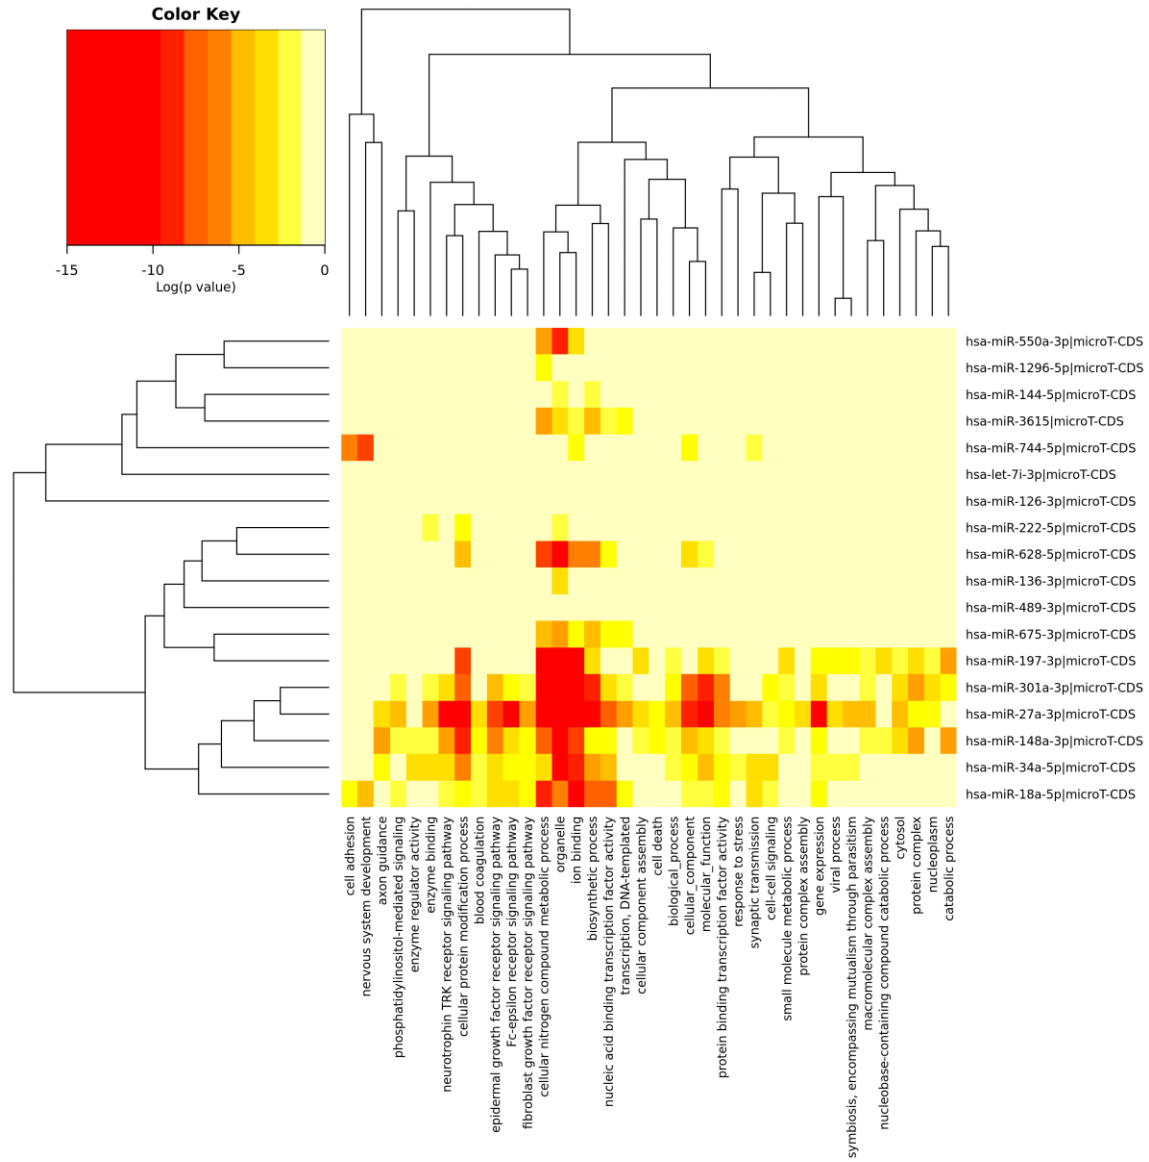

**Supplementary Figure S5.6.** GO category enrichment analysis of miRNA signatures in KIRC

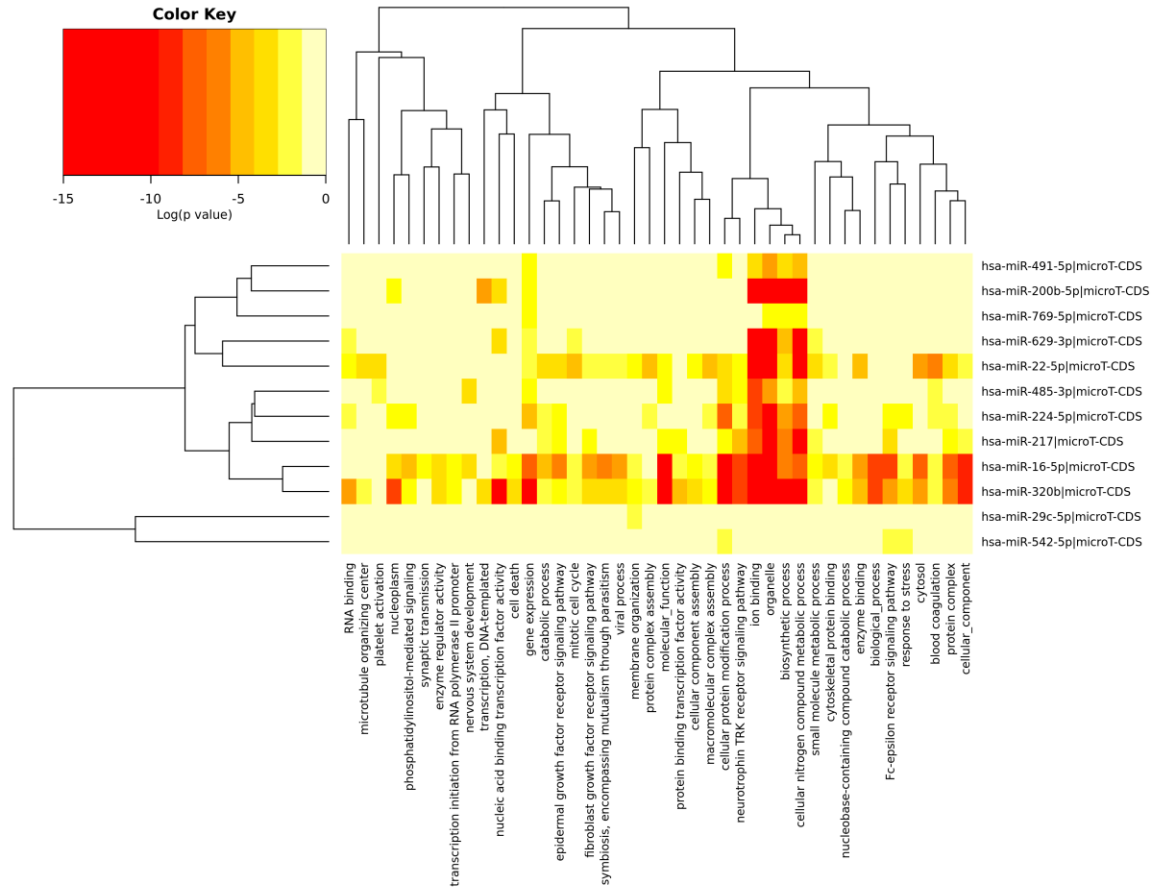

**Supplementary Figure S5.7.** GO category enrichment analysis of miRNA signatures in KIRP





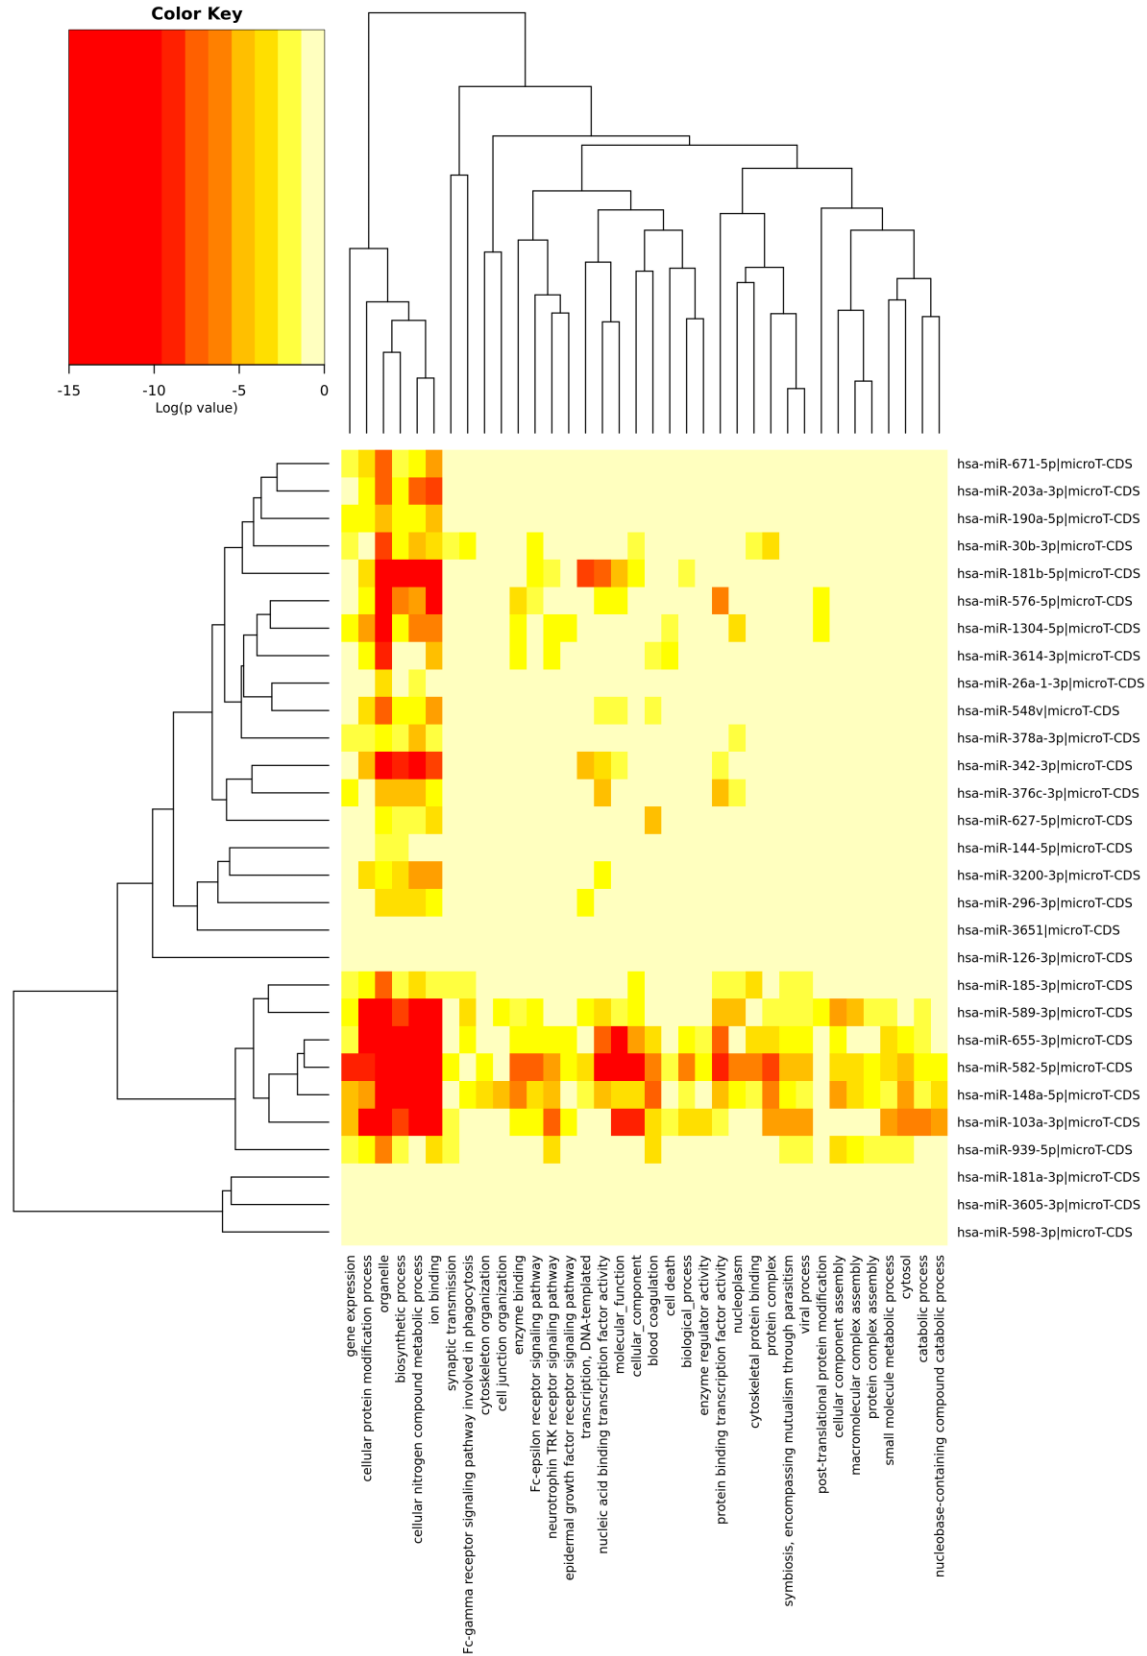

**Supplementary Figure S5.9.** GO category enrichment analysis of miRNA signatures in LUAD

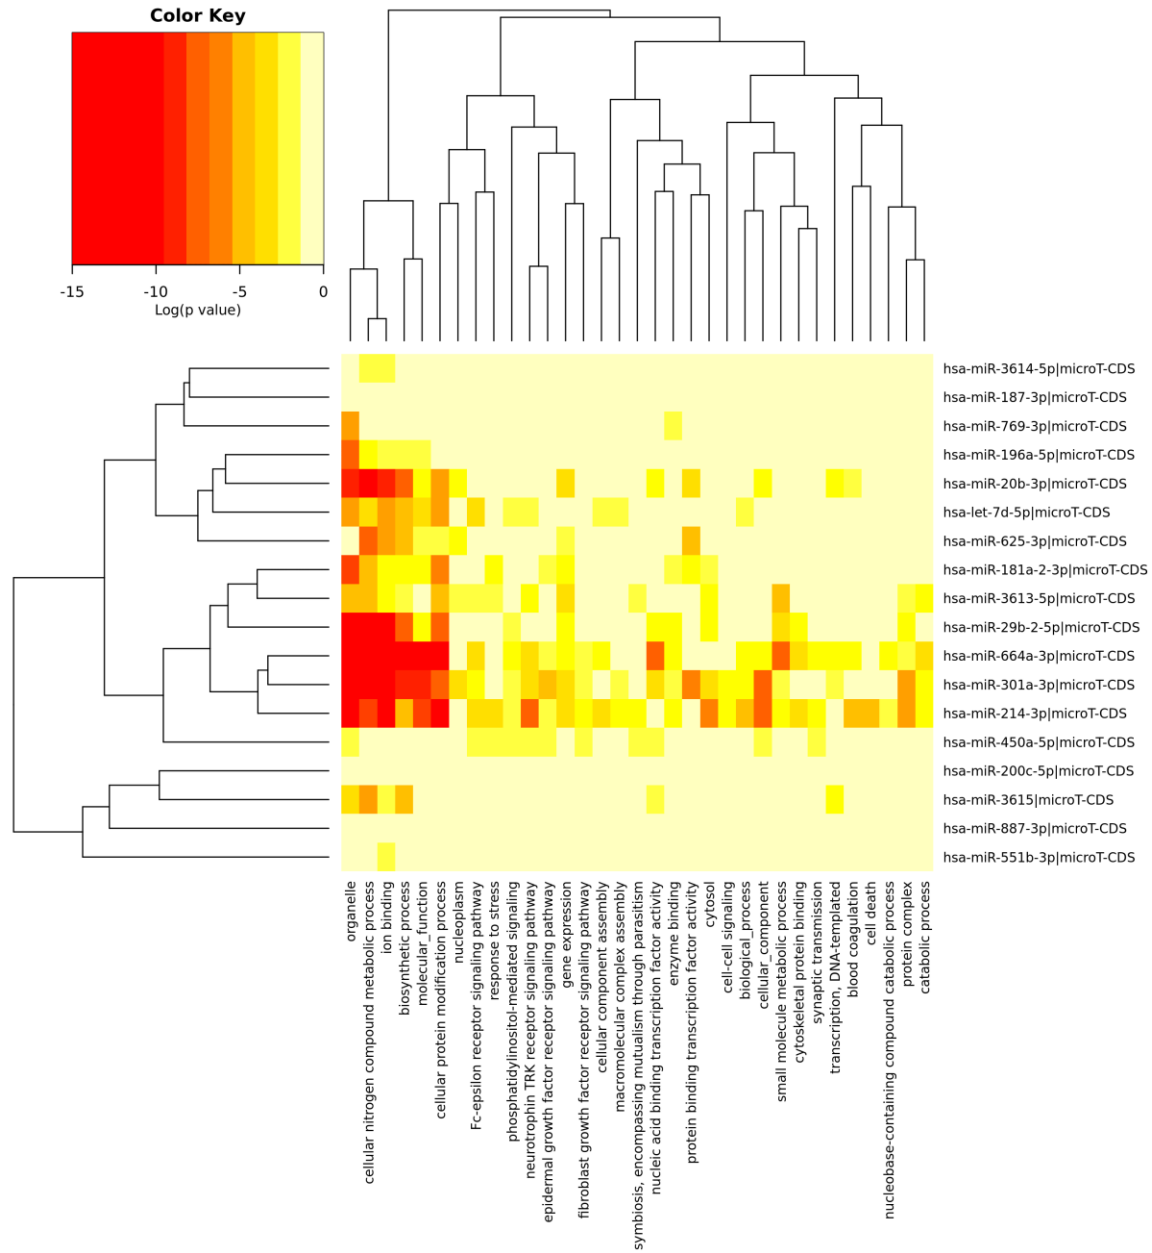

**Supplementary Figure S5.10.** GO category enrichment analysis of miRNA signatures in LUSC



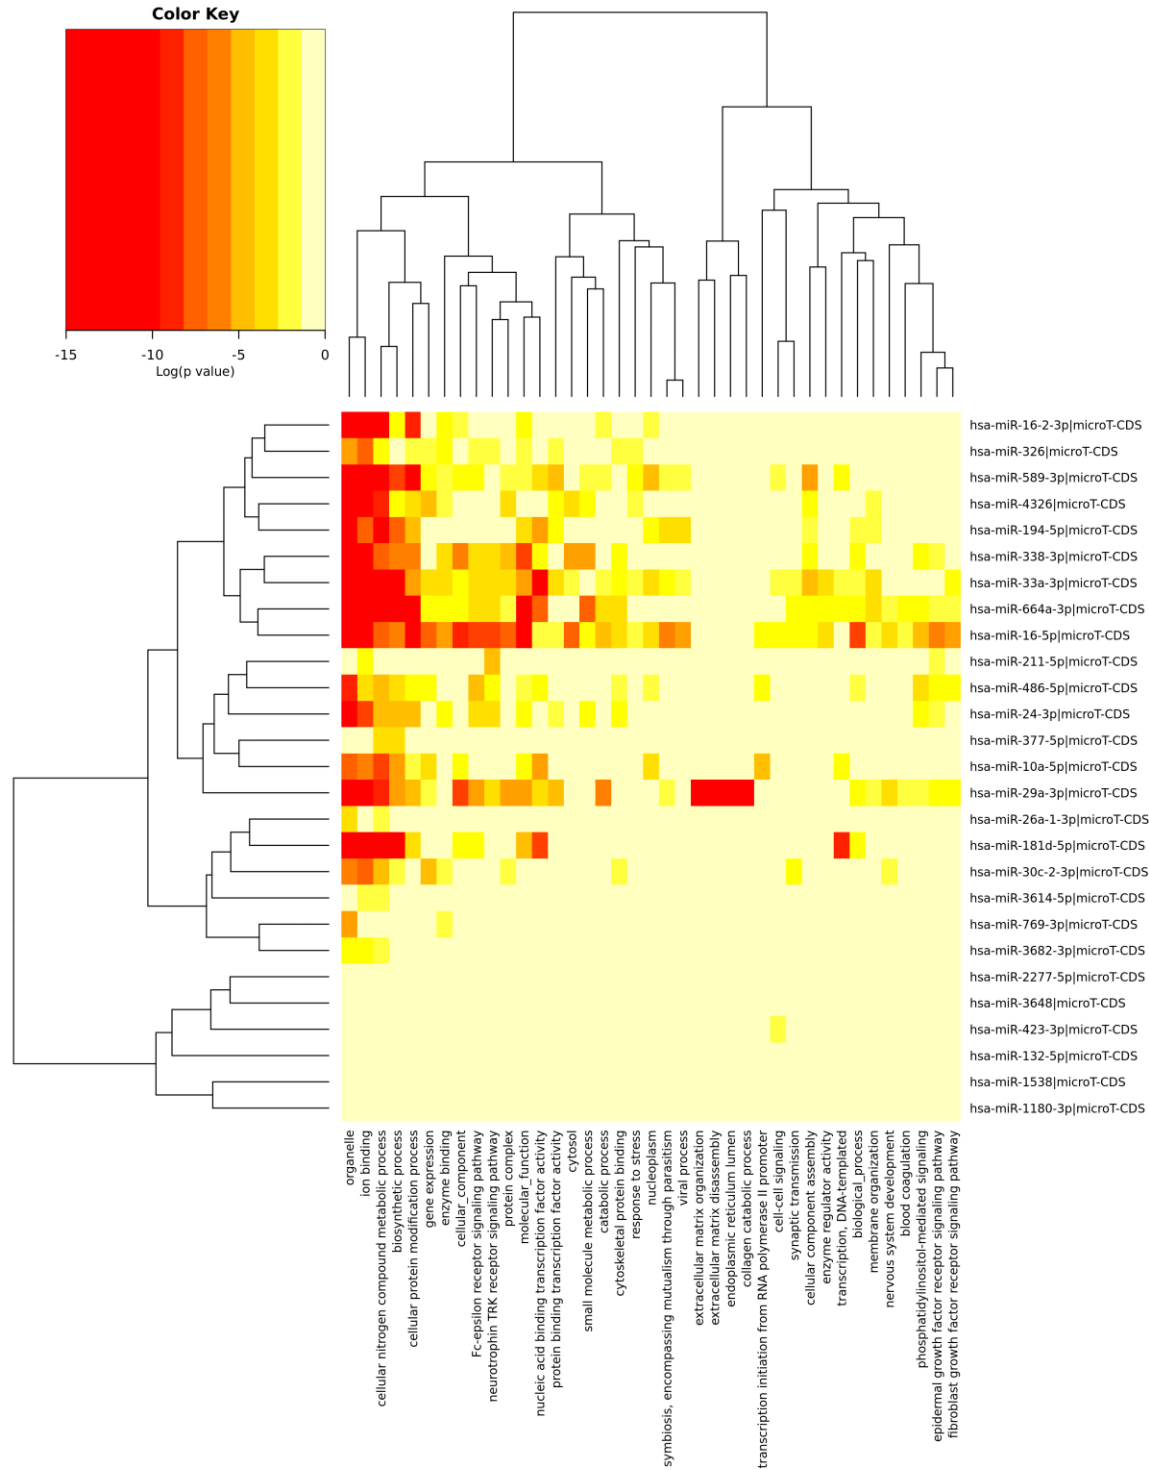

**Supplementary Figure S5.12.** GO category enrichment analysis of miRNA signatures in SKCM

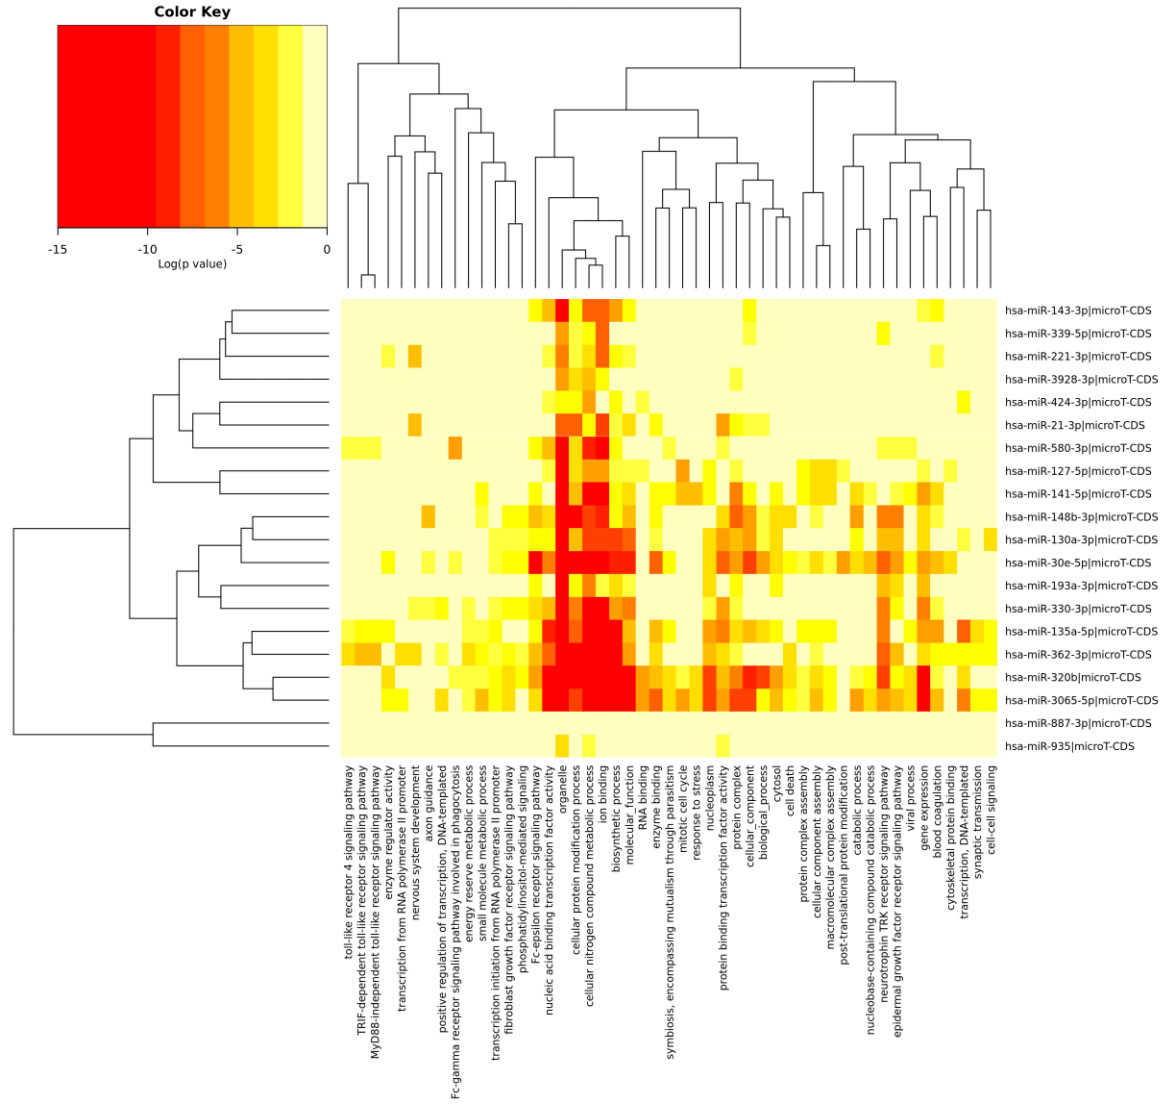

**Supplementary Figure S5.13.** GO category enrichment analysis of miRNA signatures in STAD

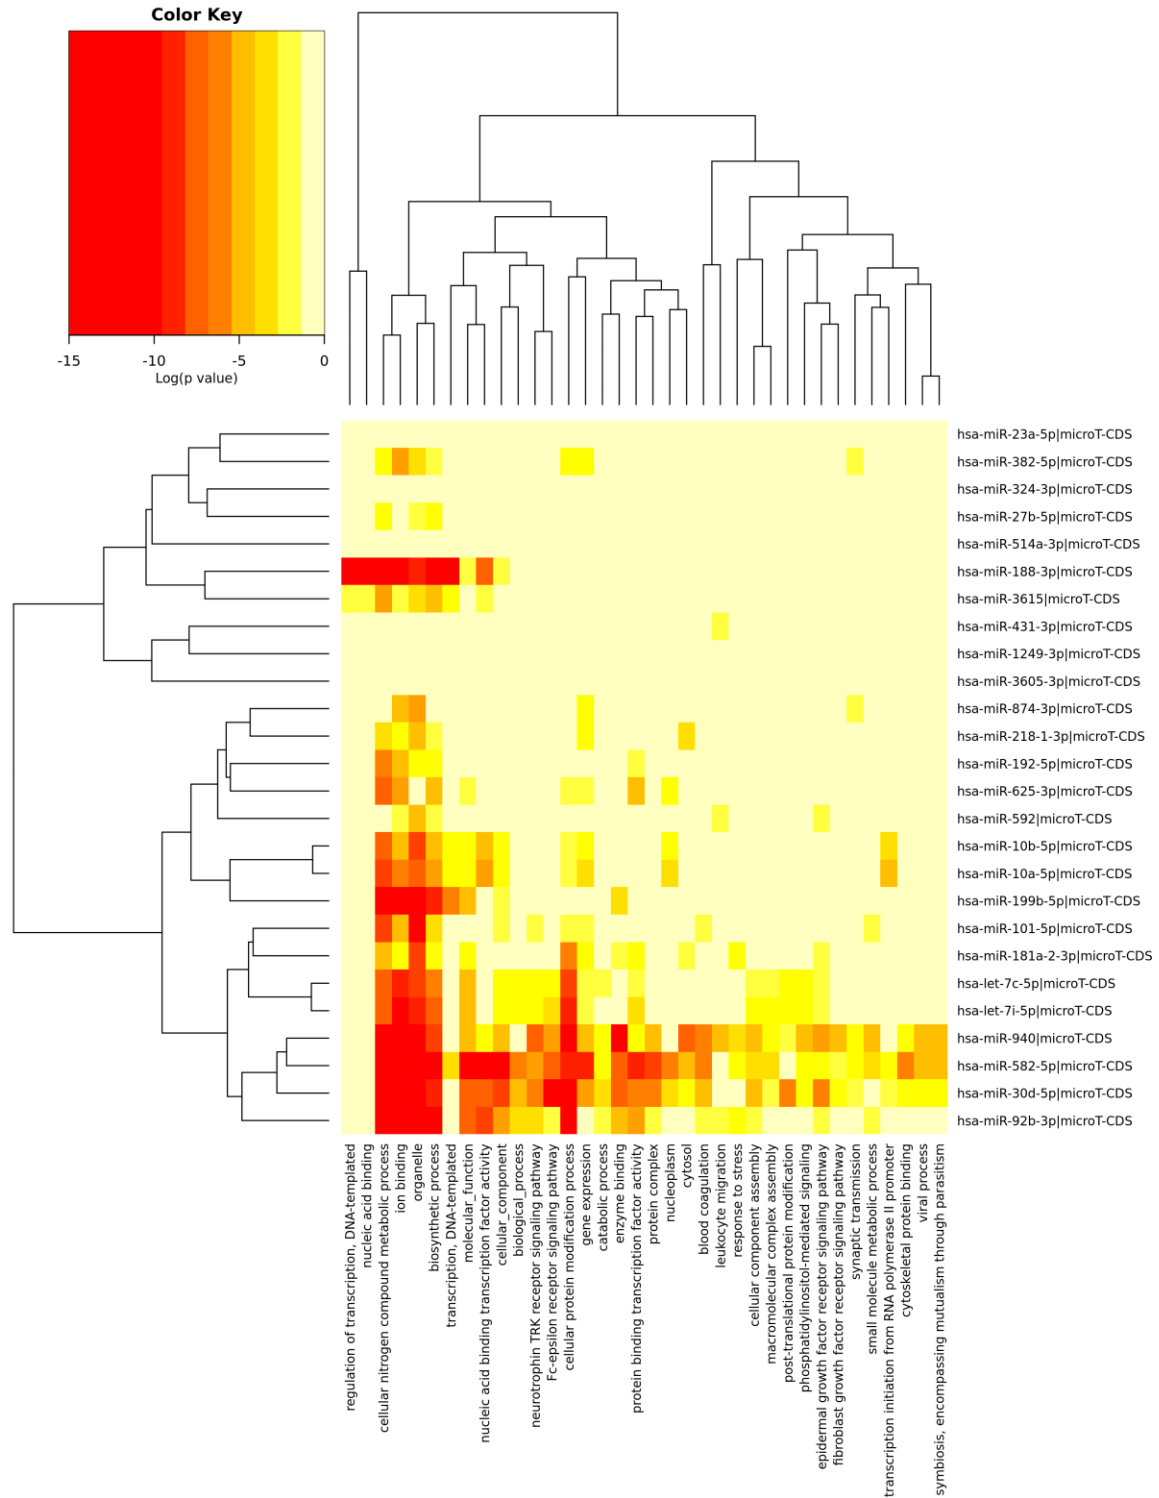

**Supplementary Figure S5.14.** GO category enrichment analysis of miRNA signatures in THCA





## Supplementary Tables

**Supplementary Table S1.** The prediction comparison results of CancerSig with different machine learning methods.

| <b>Method</b>  | <b>miRNA-signature</b> | <b>10-CV Accuracy</b> | <b>Sensitivity</b> | <b>Specificity</b> | <b>MCC</b> | <b>AUC</b> |
|----------------|------------------------|-----------------------|--------------------|--------------------|------------|------------|
| CancerSig-BLCA | 35                     | 84.40±1.27            | 0.64±0.04          | 0.93±0.01          | 0.65±0.02  | 0.82±0.01  |
| LightGBM       | 35                     | 72.22±0.04            | 0.83±0.06          | 0.51±0.14          | 0.35±0.10  | 0.72±0.06  |
| XGBoost        | 35                     | 72.70±0.06            | 0.88±0.06          | 0.41±0.16          | 0.33±0.18  | 0.73±0.05  |
| Random Forest  | 35                     | 70.98±0.05            | 0.77±0.07          | 0.59±0.16          | 0.35±0.13  | 0.74±0.05  |
| CatBoost       | 35                     | 73.93±0.06            | 0.91±0.07          | 0.39±0.12          | 0.37±0.15  | 0.74±0.05  |
| Extra Trees    | 35                     | 72.72±0.04            | 0.78±0.07          | 0.63±0.11          | 0.40±0.09  | 0.74±0.06  |

**Supplementary Table S2.1.** Contribution of individual miRNAs using MED analysis in BLCA

| <b>Rank</b> | <b>miRNA</b>     | <b>MIMAT-ID</b> | <b>MED-Score</b> |
|-------------|------------------|-----------------|------------------|
| 1           | hsa-miR-31-3p    | MIMAT0004504    | 45.21            |
| 2           | hsa-miR-29b-2-5p | MIMAT0004515    | 40.29            |
| 3           | hsa-miR-193b-3p  | MIMAT0002819    | 31.45            |
| 4           | hsa-miR-10b-5p   | MIMAT0000254    | 30.47            |
| 5           | hsa-miR-125a-3p  | MIMAT0004602    | 28.01            |
| 6           | hsa-miR-136-5p   | MIMAT0000448    | 20.15            |
| 7           | hsa-miR-3912-3p  | MIMAT0018186    | 19.16            |
| 8           | hsa-miR-205-5p   | MIMAT0000266    | 17.69            |
| 9           | hsa-miR-337-3p   | MIMAT0000754    | 17.69            |
| 10          | hsa-miR-29a-5p   | MIMAT0004503    | 17.20            |
| 11          | hsa-miR-512-3p   | MIMAT0002823    | 14.74            |
| 12          | hsa-miR-3934-5p  | MIMAT0018349    | 14.25            |
| 13          | hsa-miR-4326     | MIMAT0016888    | 14.25            |
| 14          | hsa-miR-126-3p   | MIMAT0000445    | 12.29            |
| 15          | hsa-miR-26b-5p   | MIMAT0000083    | 12.29            |
| 16          | hsa-miR-362-3p   | MIMAT0004683    | 10.32            |
| 17          | hsa-miR-760      | MIMAT0004957    | 10.32            |
| 18          | hsa-miR-27a-3p   | MIMAT0000084    | 6.39             |
| 19          | hsa-miR-199a-5p  | MIMAT0000231    | 5.90             |
| 20          | hsa-miR-483-3p   | MIMAT0002173    | 4.91             |
| 21          | hsa-miR-181c-5p  | MIMAT0000258    | 3.93             |
| 22          | hsa-let-7i-3p    | MIMAT0004585    | 3.93             |

|    |                 |              |      |
|----|-----------------|--------------|------|
| 23 | hsa-miR-526b-5p | MIMAT0002835 | 3.93 |
| 24 | hsa-miR-660-5p  | MIMAT0003338 | 3.93 |
| 25 | hsa-miR-152-3p  | MIMAT0000438 | 3.44 |
| 26 | hsa-miR-3651    | MIMAT0018071 | 3.44 |
| 27 | hsa-miR-675-3p  | MIMAT0006790 | 2.46 |
| 28 | hsa-miR-140-3p  | MIMAT0004597 | 1.97 |
| 29 | hsa-miR-3065-3p | MIMAT0015378 | 1.47 |
| 30 | hsa-miR-191-5p  | MIMAT0000440 | 1.47 |
| 31 | hsa-miR-134-5p  | MIMAT0000447 | 0.49 |
| 32 | hsa-miR-937-3p  | MIMAT0004980 | 0.49 |
| 33 | hsa-miR-30e-5p  | MIMAT0000692 | 0.49 |
| 34 | hsa-miR-589-5p  | MIMAT0004799 | 0.00 |
| 35 | hsa-miR-411-5p  | MIMAT0003329 | 0.00 |

**Supplementary Table S2.2.** Contribution of individual miRNAs using MED analysis in BRCA

| <b>Rank</b> | <b>miRNA</b>     | <b>MIMAT-ID</b> | <b>MED-Score</b> |
|-------------|------------------|-----------------|------------------|
| 1           | hsa-miR-200c-5p  | MIMAT0004657    | 69.69            |
| 2           | hsa-miR-503      | MIMAT0002874    | 65.03            |
| 3           | hsa-miR-1307-3p  | MIMAT0005951    | 48.45            |
| 4           | hsa-miR-361-3p   | MIMAT0004682    | 47.93            |
| 5           | hsa-miR-212      | MIMAT0022695    | 46.89            |
| 6           | hsa-miR-592      | MIMAT0003260    | 46.89            |
| 7           | hsa-miR-1185-1   | MIMAT0022838    | 43.26            |
| 8           | hsa-miR-146b     | MIMAT0004766    | 43.26            |
| 9           | hsa-miR-1468-5p  | MIMAT0006789    | 34.46            |
| 10          | hsa-miR-769-3p   | MIMAT0003887    | 30.83            |
| 11          | hsa-miR-3941     | MIMAT0018357    | 30.31            |
| 12          | hsa-miR-496      | MIMAT0002818    | 25.65            |
| 13          | hsa-miR-33b-5p   | MIMAT0003301    | 23.58            |
| 14          | hsa-miR-432-3p   | MIMAT0002815    | 20.98            |
| 15          | hsa-miR-153-1    | MIMAT0000439    | 19.43            |
| 16          | hsa-miR-1277     | MIMAT0005933    | 16.32            |
| 17          | hsa-miR-143-3p   | MIMAT0000435    | 12.69            |
| 18          | hsa-miR-3622a    | MIMAT0018004    | 12.69            |
| 19          | hsa-miR-137      | MIMAT0000429    | 11.14            |
| 20          | hsa-miR-3129     | MIMAT0019202    | 11.14            |
| 21          | hsa-miR-331      | MIMAT0000760    | 8.03             |
| 22          | hsa-miR-3651     | MIMAT0018071    | 6.48             |
| 23          | hsa-miR-676      | MIMAT0018203    | 5.44             |
| 24          | hsa-miR-627-5p   | MIMAT0003296    | 4.40             |
| 25          | hsa-miR-10b-5p   | MIMAT0000254    | 3.89             |
| 26          | hsa-miR-30b-3p   | MIMAT0004589    | 2.03             |
| 27          | hsa-miR-218-1-3p | MIMAT0004565    | 2.03             |
| 28          | hsa-miR-379      | MIMAT0000733    | 1.69             |
| 29          | hsa-miR-642a     | MIMAT0003312    | 1.36             |

|    |                 |              |      |
|----|-----------------|--------------|------|
| 30 | hsa-miR-3922    | MIMAT0019227 | 0.88 |
| 31 | hsa-miR-574-3p  | MIMAT0003239 | 0.34 |
| 32 | hsa-miR-324-5p  | MIMAT0000761 | 0.32 |
| 33 | hsa-miR-374c    | MIMAT0018443 | 0.30 |
| 34 | hsa-miR-500a-3p | MIMAT0002871 | 0.29 |

**Supplementary Table S2.3.** Contribution of individual miRNAs using MED analysis in COAD

| <b>Rank</b> | <b>miRNA</b>      | <b>MIMAT-ID</b> | <b>MED-Score</b> |
|-------------|-------------------|-----------------|------------------|
| 1           | hsa-miR-188-3p    | MIMAT0004613    | 73.46            |
| 2           | hsa-miR-1976      | MIMAT0009451    | 70.62            |
| 3           | hsa-miR-320a      | MIMAT0000510    | 63.98            |
| 4           | hsa-miR-450b-5p   | MIMAT0004909    | 51.66            |
| 5           | hsa-miR-140-3p    | MIMAT0004597    | 35.55            |
| 6           | hsa-miR-17-3p     | MIMAT0000071    | 34.60            |
| 7           | hsa-miR-301a-3p   | MIMAT0000688    | 33.65            |
| 8           | hsa-miR-582-5p    | MIMAT0003247    | 28.91            |
| 9           | hsa-miR-491-3p    | MIMAT0004765    | 27.01            |
| 10          | hsa-miR-501-5p    | MIMAT0002872    | 26.07            |
| 11          | hsa-miR-500a-3p   | MIMAT0002871    | 24.17            |
| 12          | hsa-miR-339-3p    | MIMAT0004702    | 21.33            |
| 13          | hsa-miR-127-5p    | MIMAT0004604    | 20.38            |
| 14          | hsa-miR-30c-2-3p  | MIMAT0004550    | 19.43            |
| 15          | hsa-miR-125b-2-3p | MIMAT0004603    | 19.43            |
| 16          | hsa-miR-664a-5p   | MIMAT0005948    | 11.85            |
| 17          | hsa-miR-32-5p     | MIMAT0000090    | 10.90            |
| 18          | hsa-miR-1237-3p   | MIMAT0005592    | 10.90            |
| 19          | hsa-miR-191-5p    | MIMAT0000440    | 5.21             |
| 20          | hsa-miR-26a-1-3p  | MIMAT0004499    | 5.21             |
| 21          | hsa-miR-1247-5p   | MIMAT0005899    | 2.37             |

**Supplementary Table S2.4.** Contribution of individual miRNAs using MED analysis in ESCA

| <b>Rank</b> | <b>miRNA</b>    | <b>MIMAT-ID</b> | <b>MED-Score</b> |
|-------------|-----------------|-----------------|------------------|
| 1           | hsa-miR-708-5p  | MIMAT0004926    | 43.83            |
| 2           | hsa-miR-199a-5p | MIMAT0000231    | 43.83            |
| 3           | hsa-miR-33b-5p  | MIMAT0003301    | 40.12            |
| 4           | hsa-miR-23a-3p  | MIMAT0000078    | 40.12            |
| 5           | hsa-miR-423-5p  | MIMAT0004748    | 30.25            |
| 6           | hsa-miR-193b-5p | MIMAT0004767    | 29.01            |
| 7           | hsa-miR-3677-3p | MIMAT0018101    | 29.01            |
| 8           | hsa-miR-362-3p  | MIMAT0004683    | 21.60            |

|    |                 |              |       |
|----|-----------------|--------------|-------|
| 9  | hsa-miR-487b-3p | MIMAT0003180 | 17.90 |
| 10 | hsa-miR-508-3p  | MIMAT0002880 | 16.67 |
| 11 | hsa-miR-31-3p   | MIMAT0004504 | 15.43 |
| 12 | hsa-miR-33a-5p  | MIMAT0000091 | 8.02  |
| 13 | hsa-miR-30a-5p  | MIMAT0000087 | 6.79  |
| 14 | hsa-miR-335-5p  | MIMAT0000765 | 6.79  |
| 15 | hsa-miR-514a-3p | MIMAT0002883 | 6.79  |
| 16 | hsa-miR-432-5p  | MIMAT0002814 | 5.56  |
| 17 | hsa-miR-1307-3p | MIMAT0005951 | 5.56  |
| 18 | hsa-miR-1262    | MIMAT0005914 | 4.32  |
| 19 | hsa-miR-101-5p  | MIMAT0004513 | 3.09  |
| 20 | hsa-miR-32-3p   | MIMAT0004505 | 3.09  |
| 21 | hsa-miR-195-3p  | MIMAT0004615 | 0.62  |
| 22 | hsa-miR-483-3p  | MIMAT0002173 | 0.62  |

**Supplementary Table S2.5.** Contribution of individual miRNAs using MED analysis in HNSC

| <b>Rank</b> | <b>miRNA</b>      | <b>MIMAT-ID</b> | <b>MED-Score</b> |
|-------------|-------------------|-----------------|------------------|
| 1           | hsa-miR-93-3p     | MIMAT0004509    | 27.14            |
| 2           | hsa-miR-335-5p    | MIMAT0000765    | 18.57            |
| 3           | hsa-miR-219a-1-3p | MIMAT0004567    | 18.10            |
| 4           | hsa-miR-361-3p    | MIMAT0004682    | 16.19            |
| 5           | hsa-miR-493-3p    | MIMAT0003161    | 15.71            |
| 6           | hsa-miR-188-3p    | MIMAT0004613    | 14.76            |
| 7           | hsa-miR-3690      | MIMAT0018119    | 12.38            |
| 8           | hsa-miR-103a-3p   | MIMAT0000101    | 11.43            |
| 9           | hsa-miR-101-5p    | MIMAT0004513    | 10.00            |
| 10          | hsa-miR-206       | MIMAT0000462    | 9.52             |
| 11          | hsa-miR-151a-5p   | MIMAT0004697    | 9.52             |
| 12          | hsa-miR-187-3p    | MIMAT0000262    | 5.24             |
| 13          | hsa-miR-7-5p      | MIMAT0000252    | 4.29             |
| 14          | hsa-miR-18a-5p    | MIMAT0000072    | 3.81             |
| 15          | hsa-miR-181a-2-3p | MIMAT0004558    | 3.81             |
| 16          | hsa-miR-365a-5p   | MIMAT0009199    | 3.81             |
| 17          | hsa-miR-125a-3p   | MIMAT0004602    | 3.33             |
| 18          | hsa-miR-30e-5p    | MIMAT0000692    | 1.43             |
| 19          | hsa-miR-3614-3p   | MIMAT0017993    | 1.43             |
| 20          | hsa-miR-409-3p    | MIMAT0001639    | 0.48             |

**Supplementary Table S2.6.** Contribution of individual miRNAs using MED analysis in KIRC

| <b>Rank</b> | <b>miRNA</b>    | <b>MIMAT-ID</b> | <b>MED-Score</b> |
|-------------|-----------------|-----------------|------------------|
| 1           | hsa-miR-144-5p  | MIMAT0004600    | 89.06            |
| 2           | hsa-miR-744-5p  | MIMAT0004945    | 40.63            |
| 3           | hsa-miR-550a-3p | MIMAT0003257    | 38.28            |

|    |                 |              |       |
|----|-----------------|--------------|-------|
| 4  | hsa-miR-1296-5p | MIMAT0005794 | 35.16 |
| 5  | hsa-let-7i-3p   | MIMAT0004585 | 28.91 |
| 6  | hsa-miR-18a-5p  | MIMAT0000072 | 26.56 |
| 7  | hsa-miR-628-5p  | MIMAT0004809 | 19.53 |
| 8  | hsa-miR-197-3p  | MIMAT0000227 | 17.97 |
| 9  | hsa-miR-222-5p  | MIMAT0004569 | 17.19 |
| 10 | hsa-miR-126-3p  | MIMAT0000445 | 14.06 |
| 11 | hsa-miR-489-3p  | MIMAT0002805 | 14.06 |
| 12 | hsa-miR-27a-3p  | MIMAT0000084 | 12.50 |
| 13 | hsa-miR-3615    | MIMAT0017994 | 11.72 |
| 14 | hsa-miR-301a-3p | MIMAT0000688 | 5.47  |
| 15 | hsa-miR-148a-3p | MIMAT0000243 | 4.69  |
| 16 | hsa-miR-136-3p  | MIMAT0004606 | 4.69  |
| 17 | hsa-miR-675-3p  | MIMAT0006790 | 1.56  |
| 18 | hsa-miR-34a-5p  | MIMAT0000255 | 0.78  |

**Supplementary Table S2.7.** Contribution of individual miRNAs using MED analysis in KIRP

| <b>Rank</b> | <b>miRNA</b>    | <b>MIMAT-ID</b> | <b>MED-Score</b> |
|-------------|-----------------|-----------------|------------------|
| 1           | hsa-miR-491-5p  | MIMAT0002807    | 18.39            |
| 2           | hsa-miR-769-5p  | MIMAT0003886    | 16.09            |
| 3           | hsa-miR-29c-5p  | MIMAT0004673    | 11.49            |
| 4           | hsa-miR-16-5p   | MIMAT0000069    | 9.20             |
| 5           | hsa-miR-200b-5p | MIMAT0004571    | 7.66             |
| 6           | hsa-miR-485-3p  | MIMAT0002176    | 7.66             |
| 7           | hsa-miR-22-5p   | MIMAT0004495    | 6.90             |
| 8           | hsa-miR-629-3p  | MIMAT0003298    | 5.36             |
| 9           | hsa-miR-320b    | MIMAT0005792    | 5.36             |
| 10          | hsa-miR-217     | MIMAT0000274    | 2.30             |
| 11          | hsa-miR-224-5p  | MIMAT0000281    | 1.53             |
| 12          | hsa-miR-542-5p  | MIMAT0003340    | 1.53             |

**Supplementary Table S2.8.** Contribution of individual miRNAs using MED analysis in LIHCC

| <b>Rank</b> | <b>miRNA</b>   | <b>MIMAT-ID</b> | <b>MED-Score</b> |
|-------------|----------------|-----------------|------------------|
| 1           | hsa-miR-550a-2 | MIMAT0004800    | 60.91269         |
| 2           | hsa-miR-549    | MIMAT0003333    | 54.72223         |
| 3           | hsa-miR-518b   | MIMAT0002844    | 51.15079         |
| 4           | hsa-miR-512-2  | MIMAT0002822    | 50.67461         |
| 5           | hsa-miR-1179   | MIMAT0005824    | 27.73809         |
| 6           | hsa-miR-574-3p | MIMAT0003239    | 27.02382         |
| 7           | hsa-miR-424-3p | MIMAT0004749    | 26.62697         |
| 8           | hsa-miR-4286   | MIMAT0016916    | 24.7222          |
| 9           | hsa-let-7i-3p  | MIMAT0004585    | 24.16667         |
| 10          | hsa-miR-320a   | MIMAT0037311    | 22.97617         |
| 11          | hsa-miR-17-3p  | MIMAT0000071    | 22.81745         |

|    |                 |              |          |
|----|-----------------|--------------|----------|
| 12 | hsa-miR-299     | MIMAT0000687 | 22.02382 |
| 13 | hsa-miR-3651    | MIMAT0018071 | 17.02382 |
| 14 | hsa-miR-2277-5p | MIMAT0017352 | 13.76985 |
| 15 | hsa-miR-621     | MIMAT0003290 | 13.61111 |
| 16 | hsa-miR-181c-5p | MIMAT0000258 | 13.05555 |
| 17 | hsa-miR-539     | MIMAT0003163 | 12.9762  |
| 18 | hsa-miR-106b    | MIMAT0000680 | 10.83334 |
| 19 | hsa-miR-1269    | MIMAT0005923 | 8.531742 |
| 20 | hsa-miR-139     | MIMAT0000250 | 6.706364 |
| 21 | hsa-miR-152-3p  | MIMAT0000438 | 6.626987 |
| 22 | hsa-miR-2355    | MIMAT0016895 | 3.76984  |
| 23 | hsa-miR-150     | MIMAT0000451 | 2.103168 |

**Supplementary Table S2.9.** Contribution of individual miRNAs using MED analysis in LUAD

| <b>Rank</b> | <b>miRNA</b>     | <b>MIMAT-ID</b> | <b>MED-Score</b> |
|-------------|------------------|-----------------|------------------|
| 1           | hsa-miR-671-5p   | MIMAT0003880    | 29.65            |
| 2           | hsa-miR-3651     | MIMAT0018071    | 27.88            |
| 3           | hsa-miR-1304-5p  | MIMAT0005892    | 24.78            |
| 4           | hsa-miR-342-3p   | MIMAT0000753    | 24.34            |
| 5           | hsa-miR-548v     | MIMAT0015020    | 22.12            |
| 6           | hsa-miR-296-3p   | MIMAT0004679    | 22.12            |
| 7           | hsa-miR-598-3p   | MIMAT0003266    | 21.68            |
| 8           | hsa-miR-190a-5p  | MIMAT0000458    | 21.24            |
| 9           | hsa-miR-144-5p   | MIMAT0004600    | 16.37            |
| 10          | hsa-miR-185-3p   | MIMAT0004611    | 15.93            |
| 11          | hsa-miR-181b-5p  | MIMAT0000257    | 15.49            |
| 12          | hsa-miR-3614-3p  | MIMAT0017993    | 15.04            |
| 13          | hsa-miR-126-3p   | MIMAT0000445    | 14.16            |
| 14          | hsa-miR-589-3p   | MIMAT0003256    | 14.16            |
| 15          | hsa-miR-26a-1-3p | MIMAT0004499    | 13.72            |
| 16          | hsa-miR-148a-5p  | MIMAT0004549    | 13.27            |
| 17          | hsa-miR-3605-3p  | MIMAT0017982    | 12.83            |
| 18          | hsa-miR-627-5p   | MIMAT0003296    | 12.83            |
| 19          | hsa-miR-376c-3p  | MIMAT0000720    | 12.39            |
| 20          | hsa-miR-30b-3p   | MIMAT0004589    | 11.50            |
| 21          | hsa-miR-3200-3p  | MIMAT0015085    | 10.18            |
| 22          | hsa-miR-378a-3p  | MIMAT0000732    | 9.29             |
| 23          | hsa-miR-103a-3p  | MIMAT0000101    | 7.96             |
| 24          | hsa-miR-203a-3p  | MIMAT0000264    | 7.96             |
| 25          | hsa-miR-576-5p   | MIMAT0003241    | 7.08             |
| 26          | hsa-miR-939-5p   | MIMAT0004982    | 2.21             |
| 27          | hsa-miR-655-3p   | MIMAT0003331    | 2.21             |
| 28          | hsa-miR-582-5p   | MIMAT0003247    | 1.77             |
| 29          | hsa-miR-181a-3p  | MIMAT0000270    | 0.44             |

**Supplementary Table S2.10.** Contribution of individual miRNAs using MED analysis in LUSC

| <b>Rank</b> | <b>miRNA</b>      | <b>MIMAT-ID</b> | <b>MED-Score</b> |
|-------------|-------------------|-----------------|------------------|
| 1           | hsa-miR-181a-2-3p | MIMAT0004558    | 28.02            |
| 2           | hsa-miR-664a-3p   | MIMAT0005949    | 20.35            |
| 3           | hsa-miR-769-3p    | MIMAT0003887    | 19.17            |
| 4           | hsa-miR-29b-2-5p  | MIMAT0004515    | 17.40            |
| 5           | hsa-miR-3614-5p   | MIMAT0017992    | 16.22            |
| 6           | hsa-miR-214-3p    | MIMAT0000271    | 13.86            |
| 7           | hsa-miR-200c-5p   | MIMAT0004657    | 12.68            |
| 8           | hsa-miR-3613-5p   | MIMAT0017990    | 12.09            |
| 9           | hsa-miR-196a-5p   | MIMAT0000226    | 10.32            |
| 10          | hsa-miR-551b-3p   | MIMAT0003233    | 9.73             |
| 11          | hsa-miR-301a-3p   | MIMAT0000688    | 9.14             |
| 12          | hsa-miR-450a-5p   | MIMAT0001545    | 9.14             |
| 13          | hsa-let-7d-5p     | MIMAT0000065    | 7.96             |
| 14          | hsa-miR-187-3p    | MIMAT0000262    | 7.96             |
| 15          | hsa-miR-20b-3p    | MIMAT0004752    | 7.96             |
| 16          | hsa-miR-887-3p    | MIMAT0004951    | 6.19             |
| 17          | hsa-miR-625-3p    | MIMAT0004808    | 0.88             |
| 18          | hsa-miR-3615      | MIMAT0017994    | 0.29             |

**Supplementary Table S2.11.** Contribution of individual miRNAs using MED analysis in READ

| <b>Rank</b> | <b>miRNA</b>    | <b>MIMAT-ID</b> | <b>MED-Score</b> |
|-------------|-----------------|-----------------|------------------|
| 1           | hsa-miR-10a-5p  | MIMAT0000253    | 30.30            |
| 2           | hsa-miR-9-5p    | MIMAT0000441    | 30.30            |
| 3           | hsa-miR-135b-3p | MIMAT0004698    | 27.27            |
| 4           | hsa-miR-491-5p  | MIMAT0002807    | 24.24            |
| 5           | hsa-miR-31-3p   | MIMAT0004504    | 18.18            |
| 6           | hsa-miR-656-3p  | MIMAT0003332    | 18.18            |
| 7           | hsa-miR-140-5p  | MIMAT0000431    | 15.15            |
| 8           | hsa-miR-1269a   | MIMAT0005923    | 15.15            |
| 9           | hsa-miR-1468-5p | MIMAT0006789    | 9.09             |
| 10          | hsa-miR-935     | MIMAT0004978    | 9.09             |
| 11          | hsa-miR-200b-3p | MIMAT0000318    | 3.03             |

**Supplementary Table S2.12.** Contribution of individual miRNAs using MED analysis in SKCM

| <b>Rank</b> | <b>miRNA</b>   | <b>MIMAT-ID</b> | <b>MED-Score</b> |
|-------------|----------------|-----------------|------------------|
| 1           | hsa-miR-211-5p | MIMAT0000268    | 39.07            |
| 2           | hsa-miR-194-5p | MIMAT0000460    | 31.36            |



|    |                  |              |       |
|----|------------------|--------------|-------|
| 3  | hsa-miR-3614-5p  | MIMAT0017992 | 30.33 |
| 4  | hsa-miR-326      | MIMAT0000756 | 29.31 |
| 5  | hsa-miR-4326     | MIMAT0016888 | 28.79 |
| 6  | hsa-miR-1180-3p  | MIMAT0005825 | 28.79 |
| 7  | hsa-miR-664a-3p  | MIMAT0005949 | 27.25 |
| 8  | hsa-miR-26a-1-3p | MIMAT0004499 | 21.59 |
| 9  | hsa-miR-132-5p   | MIMAT0004594 | 19.02 |
| 10 | hsa-miR-1538     | MIMAT0007400 | 16.97 |
| 11 | hsa-miR-10a-5p   | MIMAT0000253 | 15.42 |
| 12 | hsa-miR-423-3p   | MIMAT0001340 | 13.37 |
| 13 | hsa-miR-338-3p   | MIMAT0000763 | 11.83 |
| 14 | hsa-miR-30c-2-3p | MIMAT0004550 | 11.31 |
| 15 | hsa-miR-769-3p   | MIMAT0003887 | 11.31 |
| 16 | hsa-miR-2277-5p  | MIMAT0017352 | 9.25  |
| 17 | hsa-miR-16-5p    | MIMAT0000069 | 5.66  |
| 18 | hsa-miR-181d-5p  | MIMAT0002821 | 5.14  |
| 19 | hsa-miR-3648     | MIMAT0018068 | 4.63  |
| 20 | hsa-miR-589-3p   | MIMAT0003256 | 3.60  |
| 21 | hsa-miR-16-2-3p  | MIMAT0004518 | 2.57  |
| 22 | hsa-miR-29a-3p   | MIMAT0000086 | 2.06  |
| 23 | hsa-miR-24-3p    | MIMAT0000080 | 2.06  |
| 24 | hsa-miR-486-5p   | MIMAT0002177 | 2.06  |
| 25 | hsa-miR-3682-3p  | MIMAT0018110 | 1.54  |
| 26 | hsa-miR-33a-3p   | MIMAT0004506 | 1.03  |
| 27 | hsa-miR-377-5p   | MIMAT0004689 | 0.51  |

**Supplementary Table S2.13.** Contribution of individual miRNAs using MED analysis in STAD

| <b>Rank</b> | <b>miRNA</b>    | <b>MIMAT-ID</b> | <b>MED-Score</b> |
|-------------|-----------------|-----------------|------------------|
| 1           | hsa-miR-130a-3p | MIMAT0000425    | 34.38            |
| 2           | hsa-miR-320b    | MIMAT0005792    | 30.18            |
| 3           | hsa-miR-141-5p  | MIMAT0004598    | 29.13            |
| 4           | hsa-miR-3065-5p | MIMAT0015066    | 25.46            |
| 5           | hsa-miR-887-3p  | MIMAT0004951    | 24.41            |
| 6           | hsa-miR-362-3p  | MIMAT0004683    | 20.73            |
| 7           | hsa-miR-135a-5p | MIMAT0000428    | 19.69            |
| 8           | hsa-miR-21-3p   | MIMAT0004494    | 16.01            |
| 9           | hsa-miR-148b-3p | MIMAT0000759    | 14.96            |
| 10          | hsa-miR-580-3p  | MIMAT0003245    | 12.86            |
| 11          | hsa-miR-330-3p  | MIMAT0000751    | 8.66             |
| 12          | hsa-miR-143-3p  | MIMAT0000435    | 6.56             |
| 13          | hsa-miR-339-5p  | MIMAT0000764    | 6.56             |
| 14          | hsa-miR-30e-5p  | MIMAT0000692    | 5.51             |
| 15          | hsa-miR-3928-3p | MIMAT0018205    | 4.99             |
| 16          | hsa-miR-935     | MIMAT0004978    | 4.46             |
| 17          | hsa-miR-127-5p  | MIMAT0004604    | 3.94             |

|    |                 |              |      |
|----|-----------------|--------------|------|
| 18 | hsa-miR-424-3p  | MIMAT0004749 | 2.89 |
| 19 | hsa-miR-221-3p  | MIMAT0000278 | 1.84 |
| 20 | hsa-miR-193a-3p | MIMAT0000459 | 0.26 |

**Supplementary Table S2.14.** Contribution of individual miRNAs using MED analysis in THCA

| <b>Rank</b> | <b>miRNA</b>      | <b>MIMAT-ID</b> | <b>MED-Score</b> |
|-------------|-------------------|-----------------|------------------|
| 1           | hsa-miR-940       | MIMAT0004983    | 34.80            |
| 2           | hsa-let-7i-5p     | MIMAT0000415    | 25.60            |
| 3           | hsa-miR-1249-3p   | MIMAT0005901    | 23.60            |
| 4           | hsa-miR-101-5p    | MIMAT0004513    | 23.20            |
| 5           | hsa-miR-874-3p    | MIMAT0004911    | 23.20            |
| 6           | hsa-miR-3605-3p   | MIMAT0017982    | 19.60            |
| 7           | hsa-miR-592       | MIMAT0003260    | 18.80            |
| 8           | hsa-miR-188-3p    | MIMAT0004613    | 16.40            |
| 9           | hsa-miR-30d-5p    | MIMAT0000245    | 13.60            |
| 10          | hsa-miR-218-1-3p  | MIMAT0004565    | 13.20            |
| 11          | hsa-miR-23a-5p    | MIMAT0004496    | 12.00            |
| 12          | hsa-miR-324-3p    | MIMAT0000762    | 11.20            |
| 13          | hsa-miR-10a-5p    | MIMAT0000253    | 10.40            |
| 14          | hsa-miR-431-3p    | MIMAT0004757    | 10.00            |
| 15          | hsa-miR-199b-5p   | MIMAT0000263    | 9.20             |
| 16          | hsa-miR-514a-3p   | MIMAT0002883    | 7.20             |
| 17          | hsa-miR-10b-5p    | MIMAT0000254    | 6.40             |
| 18          | hsa-let-7c-5p     | MIMAT0000064    | 5.60             |
| 19          | hsa-miR-27b-5p    | MIMAT0004588    | 5.60             |
| 20          | hsa-miR-192-5p    | MIMAT0000222    | 4.80             |
| 21          | hsa-miR-382-5p    | MIMAT0000737    | 4.40             |
| 22          | hsa-miR-625-3p    | MIMAT0004808    | 3.20             |
| 23          | hsa-miR-92b-3p    | MIMAT0003218    | 3.20             |
| 24          | hsa-miR-181a-2-3p | MIMAT0004558    | 0.80             |
| 25          | hsa-miR-3615      | MIMAT0017994    | 0.40             |
| 26          | hsa-miR-582-5p    | MIMAT0003247    | 0.40             |

**Supplementary Table S2.15.** Contribution of individual miRNAs using MED analysis in UVM

| <b>Rank</b> | <b>miRNA</b>    | <b>MIMAT-ID</b> | <b>MED-Score</b> |
|-------------|-----------------|-----------------|------------------|
| 1           | hsa-miR-335-5p  | MIMAT0000765    | 50.63            |
| 2           | hsa-miR-192-3p  | MIMAT0004543    | 45.57            |
| 3           | hsa-miR-3687    | MIMAT0018115    | 45.57            |
| 4           | hsa-miR-664a-5p | MIMAT0005948    | 35.44            |
| 5           | hsa-miR-1247-5p | MIMAT0005899    | 35.44            |
| 6           | hsa-miR-3613-3p | MIMAT0017991    | 20.25            |
| 7           | hsa-let-7i-3p   | MIMAT0004585    | 20.25            |
| 8           | hsa-miR-224-5p  | MIMAT0000281    | 20.25            |
| 9           | hsa-miR-3917    | MIMAT0018191    | 20.25            |

---

|    |                |              |       |
|----|----------------|--------------|-------|
| 10 | hsa-miR-20b-3p | MIMAT0004752 | 15.19 |
| 11 | hsa-miR-362-3p | MIMAT0004683 | 10.13 |
| 12 | hsa-miR-581    | MIMAT0003246 | 10.13 |
| 13 | hsa-miR-222-5p | MIMAT0004569 | 5.06  |

---

**Supplementary Table S3. Comparison of expression difference of has-let-7i-3p, has-miR-362-3p, and has-miR-3651 in cancer vs normal samples**

| miRNA         | Cancer type                           | Fold change | log2(Fold change) | Mean RPM* (tumor) | Mean RPM* (normal) | p-value  | adjusted p-value |
|---------------|---------------------------------------|-------------|-------------------|-------------------|--------------------|----------|------------------|
| hsa-let-7i-3p | Breast invasive carcinoma             | -2.05       | -1.04             | 78.73             | 161.63             | 1.21e-26 | 5.6e-26          |
|               | Kidney renal clear cell carcinoma     | 1.55        | 0.63              | 80.23             | 51.77              | 3.35e-12 | 8.7e-12          |
|               | Liver hepatocellular carcinoma        | -1.42       | -0.5              | 36.06             | 51.08              | 8.39e-10 | 3.02e-9          |
|               | Prostate adenocarcinoma               | -1.54       | -0.62             | 16.8              | 25.87              | 1.06e-8  | 3.56e-8          |
|               | Pan-kidney cohort (KICH+KIRC+KIRP)    | 1.26        | 0.33              | 60.03             | 47.83              | 0.000107 | 0.000158         |
|               | Uterine Corpus Endometrial Carcinoma  | -1.2        | -0.26             | 76.76             | 92.02              | 0.0022   | 0.00334          |
|               | Lung adenocarcinoma                   | -1.17       | -0.23             | 117.97            | 138.33             | 0.0124   | 0.019            |
|               | Cholangiocarcinoma                    | 1.6         | 0.67              | 53.7              | 33.64              | 0.00849  | 0.0219           |
|               | Lung squamous cell carcinoma          | 1.21        | 0.27              | 125.65            | 104                | 0.0227   | 0.0308           |
|               | Stomach adenocarcinoma                | -1.82       | -0.86             | 75.82             | 137.73             | 0.026    | 0.0386           |
|               | Bladder Urothelial Carcinoma          | -1.13       | -0.18             | 65.7              | 74.31              | 0.0328   | 0.0487           |
|               | Kidney renal papillary cell carcinoma | -1.33       | -0.41             | 33.11             | 43.95              | 0.0618   | 0.0772           |
|               | Thyroid carcinoma                     | -1.09       | -0.12             | 467.46            | 508.8              | 0.0642   | 0.0911           |
|               | Stomach and Esophageal carcinoma      | -1.72       | -0.78             | 66.97             | 115.14             | 0.178    | 0.213            |
|               | Cervical squamous cell carcinoma and  | 1.58        | 0.66              | 82.23             | 52.11              | 0.255    | 0.377            |

|                |                                       |       |       |        |        |           |           |
|----------------|---------------------------------------|-------|-------|--------|--------|-----------|-----------|
|                | endocervical adenocarcinoma           |       |       |        |        |           |           |
|                | Pheochromocytoma and Paraganglioma    | 1.39  | 0.47  | 27.92  | 20.13  | 0.264     | 0.387     |
|                | Esophageal carcinoma                  | 1.15  | 0.2   | 45.82  | 40.02  | 0.294     | 0.42      |
|                | Kidney Chromophobe                    | -1.04 | -0.05 | 42.21  | 43.8   | 0.386     | 0.451     |
|                | Skin Cutaneous Melanoma               | -1.58 | -0.66 | 85.33  | 134.57 | 0.103     | 0.543     |
|                | Head and Neck squamous cell carcinoma | -1.05 | -0.07 | 112.93 | 118.22 | 0.597     | 0.638     |
|                | Thymoma                               | -1.11 | -0.15 | 69.61  | 77.46  | 0.238     | 0.678     |
|                | Pancreatic adenocarcinoma             | -1    | -0.01 | 76.59  | 76.9   | 0.92      | 0.981     |
| hsa-miR-362-3p | Pan-kidney cohort (KICH+KIRC+KIRP)    | -1.81 | -0.86 | 2.8    | 5.08   | 7.02E-16  | 1.76E-15  |
|                | Liver hepatocellular carcinoma        | 2.33  | 1.22  | 4.23   | 1.82   | 4.02E-16  | 3.93E-15  |
|                | Head and Neck squamous cell carcinoma | -1.92 | -0.94 | 2.44   | 4.69   | 7.64E-13  | 4.47E-12  |
|                | Lung squamous cell carcinoma          | -1.67 | -0.74 | 2.36   | 3.95   | 9.72E-12  | 2.99E-11  |
|                | Breast invasive carcinoma             | 1.94  | 0.96  | 1.63   | 0.84   | 1.98E-11  | 4.40E-11  |
|                | Kidney renal clear cell carcinoma     | -1.67 | -0.74 | 2.17   | 3.62   | 4.73E-09  | 9.64E-09  |
|                | Kidney renal papillary cell carcinoma | -2.4  | -1.26 | 2.96   | 7.12   | 1.21E-08  | 3.80E-08  |
|                | Stomach adenocarcinoma                | 1.72  | 0.78  | 3.91   | 2.28   | 0.0000132 | 0.0000379 |
|                | Bladder Urothelial Carcinoma          | 1.76  | 0.82  | 2.83   | 1.6    | 0.0013    | 0.00261   |
|                | Uterine Corpus Endometrial Carcinoma  | -1.4  | -0.48 | 4.73   | 6.6    | 0.00427   | 0.00633   |

|              |                                                                  |       |       |      |      |          |            |
|--------------|------------------------------------------------------------------|-------|-------|------|------|----------|------------|
|              | Stomach and Esophageal carcinoma                                 | 1.31  | 0.39  | 3.77 | 2.88 | 0.00446  | 0.00717    |
|              | Lung adenocarcinoma                                              | -1.22 | -0.29 | 2.53 | 3.09 | 0.0274   | 0.0395     |
|              | Esophageal carcinoma                                             | -1.4  | -0.49 | 3.41 | 4.78 | 0.0443   | 0.0938     |
|              | Thyroid carcinoma                                                | -1.1  | -0.14 | 2.3  | 2.54 | 0.0931   | 0.129      |
|              | Kidney Chromophobe                                               | 1     | 0     | 5.63 | 5.61 | 0.353    | 0.417      |
|              | Pancreatic adenocarcinoma                                        | -1.47 | -0.56 | 2.44 | 3.59 | 0.121    | 0.438      |
|              | Thymoma                                                          | 2.7   | 1.43  | 4.93 | 1.83 | 0.0376   | 0.509      |
|              | Skin Cutaneous Melanoma                                          | 3.8   | 1.93  | 4.69 | 1.23 | 0.12     | 0.574      |
|              | Pheochromocytoma and Paraganglioma                               | -1    | 0     | 2.51 | 2.51 | 0.459    | 0.59       |
|              | Prostate adenocarcinoma                                          | -1.06 | -0.08 | 2.32 | 2.45 | 0.603    | 0.663      |
|              | Cervical squamous cell carcinoma and endocervical adenocarcinoma | -1.06 | -0.08 | 3.5  | 3.71 | 0.6      | 0.689      |
| hsa-miR-3651 | Lung squamous cell carcinoma                                     | 3.8   | 1.93  | 2.05 | 0.54 | 1.49E-12 | 4.87E-12   |
|              | Uterine Corpus Endometrial Carcinoma                             | 3.78  | 1.92  | 2.15 | 0.57 | 5.02E-09 | 1.39E-08   |
|              | Stomach and Esophageal carcinoma                                 | 3.29  | 1.72  | 2.11 | 0.64 | 8.20E-08 | 3.21E-07   |
|              | Head and Neck squamous cell carcinoma                            | 2.98  | 1.58  | 1.87 | 0.62 | 1.15E-07 | 3.23E-07   |
|              | Breast invasive carcinoma                                        | 2.18  | 1.12  | 1.35 | 0.62 | 1.42E-06 | 0.00000236 |
|              | Stomach adenocarcinoma                                           | 3.15  | 1.65  | 1.57 | 0.5  | 9.66E-07 | 0.00000342 |
|              | Kidney Chromophobe                                               | 4.68  | 2.23  | 0.47 | 0.1  | 9.91E-06 | 0.0000255  |
|              | Thyroid carcinoma                                                | -1.53 | -0.61 | 1.02 | 1.57 | 0.0114   | 0.0186     |

|                                          |       |       |      |      |        |        |
|------------------------------------------|-------|-------|------|------|--------|--------|
| Esophageal carcinoma                     | 3.11  | 1.64  | 3.38 | 1.09 | 0.0417 | 0.0903 |
| Pan-kidney cohort<br>(KICH+KIRC+KIRP)    | 1.62  | 0.7   | 0.44 | 0.27 | 0.211  | 0.235  |
| Liver hepatocellular<br>carcinoma        | 1.44  | 0.53  | 0.85 | 0.59 | 0.216  | 0.263  |
| Pancreatic<br>adenocarcinoma             | -1.24 | -0.31 | 0.27 | 0.34 | 0.498  | 0.757  |
| Kidney renal papillary cell<br>carcinoma | 1.28  | 0.36  | 0.42 | 0.33 | 0.74   | 0.768  |
| Thymoma                                  | 1.95  | 0.97  | 0.75 | 0.38 | 0.838  | 0.964  |

**Supplementary Table S4. Co-expression analysis of miRNA signatures across 15 cancers**

| <b>Cancer</b>   | <b>BLCA-Signature</b> | <b>Correlated miRNAs</b> | <b>R</b>        |
|-----------------|-----------------------|--------------------------|-----------------|
| <b>BLCA</b>     | hsa.miR.136.5p        | hsa.miR.127.5p           | 0.85083         |
|                 | hsa.miR.337.3p        | hsa.miR.493.5p           | 0.87111         |
|                 |                       | hsa.miR.431.3p           | 0.86363         |
|                 |                       | hsa.miR.432.5p           | 0.85247         |
|                 |                       | hsa.miR.487b.3p          | 0.84928         |
|                 |                       | hsa.miR.654.3p           | 0.84251         |
|                 |                       | hsa.miR.127.5p           | 0.83623         |
|                 |                       | hsa.miR.409.3p           | 0.82585         |
|                 |                       | hsa.miR.758.3p           | 0.82543         |
|                 |                       | hsa.miR.379.5p           | 0.81228         |
|                 |                       | hsa.miR.376c.3p          | 0.81211         |
|                 |                       | hsa.miR.370.3p           | 0.80815         |
|                 |                       | hsa.miR.512.3p           | hsa.miR.526b.5p |
|                 | hsa.miR.27a.3p        | hsa.miR.23a.3p           | 0.86959         |
|                 | hsa.miR.199a.5p       | hsa.miR.214.5p           | 0.88195         |
|                 | hsa.miR.526b.5p       | hsa.miR.512.3p           | 0.87879         |
|                 | hsa.miR.660.5p        | hsa.miR.532.5p           | 0.82708         |
|                 | hsa.miR.411.5p        | hsa.miR.379.5p           | 0.90819         |
|                 |                       | hsa.miR.127.3p           | 0.88842         |
|                 |                       | hsa.miR.654.3p           | 0.84351         |
|                 |                       | hsa.miR.134.5p           | 0.83746         |
|                 |                       | hsa.miR.376c.3p          | 0.82878         |
|                 |                       | hsa.miR.381.3p           | 0.8251          |
| hsa.miR.889.3p  |                       | 0.8228                   |                 |
| hsa.miR.369.5p  |                       | 0.82235                  |                 |
| hsa.miR.382.5p  |                       | 0.81615                  |                 |
| hsa.miR.410.3p  |                       | 0.81458                  |                 |
| hsa.miR.493.3p  |                       | 0.8135                   |                 |
| hsa.miR.758.3p  | 0.81267               |                          |                 |
| <b>BRCA</b>     | hsa.miR.379           | hsa.miR.127              | 0.8525          |
|                 |                       | hsa.miR.758              | 0.83849         |
|                 |                       | hsa.miR.410              | 0.80367         |
|                 | hsa.miR.500a          | hsa.miR.501              | 0.84981         |
| <b>COAD</b>     | hsa.miR.450b.5p       | hsa.miR.542.3p           | 0.86189         |
|                 | hsa.miR.17.3p         | hsa.miR.20a.5p           | 0.80638         |
|                 | hsa.miR.500a.3p       | hsa.miR.501.3p           | 0.90779         |
|                 |                       | hsa.miR.532.5p           | 0.86472         |
|                 | hsa.miR.127.5p        | hsa.miR.136.5p           | 0.82682         |
|                 | hsa.miR.125b.2.3p     | hsa.miR.99a.5p           | 0.8971          |
| hsa.let.7c.5p   |                       | 0.86362                  |                 |
| hsa.miR.125b.5p |                       | 0.81756                  |                 |



|                 |                 |                 |         |
|-----------------|-----------------|-----------------|---------|
| <b>ESCA</b>     | hsa.miR.191.5p  | hsa.miR.425.5p  | 0.8532  |
|                 | hsa.miR.199a.5p | hsa.miR.214.5p  | 0.88019 |
|                 | hsa.miR.23a.3p  | hsa.miR.27a.3p  | 0.86622 |
|                 | hsa.miR.487b.3p | hsa.miR.127.3p  | 0.81253 |
|                 |                 | hsa.miR.889.3p  | 0.80128 |
|                 | hsa.miR.508.3p  | hsa.miR.509.3p  | 0.89842 |
|                 |                 | hsa.miR.514a.3p | 0.8673  |
| hsa.miR.514a.3p | hsa.miR.508.3p  | 0.8673          |         |
|                 | hsa.miR.509.3p  | 0.83004         |         |
| hsa.miR.432.5p  | hsa.miR.431.3p  | 0.84021         |         |
|                 | hsa.miR.382.5p  | 0.80104         |         |
| <b>HNSC</b>     | hsa.miR.493.3p  | hsa.miR.409.3p  | 0.87754 |
|                 |                 | hsa.miR.382.5p  | 0.85962 |
|                 |                 | hsa.miR.889.3p  | 0.85175 |
|                 |                 | hsa.miR.758.3p  | 0.84649 |
|                 |                 | hsa.miR.127.3p  | 0.84367 |
|                 |                 | hsa.miR.493.5p  | 0.83876 |
|                 |                 | hsa.miR.432.5p  | 0.8339  |
|                 |                 | hsa.miR.379.5p  | 0.82919 |
|                 |                 | hsa.miR.410.3p  | 0.82704 |
|                 |                 | hsa.miR.370.3p  | 0.81859 |
|                 |                 | hsa.miR.134.5p  | 0.81074 |
|                 |                 | hsa.miR.431.3p  | 0.81054 |
|                 |                 | hsa.miR.654.3p  | 0.80543 |
|                 | hsa.miR.206     | hsa.miR.133b    | 0.95344 |
|                 |                 | hsa.miR.1.3p    | 0.94774 |
|                 | hsa.miR.18a.5p  | hsa.miR.17.5p   | 0.82446 |
|                 |                 | hsa.miR.19a.3p  | 0.82434 |
|                 | hsa.miR.409.3p  | hsa.miR.382.5p  | 0.93486 |
|                 |                 | hsa.miR.758.3p  | 0.89757 |
|                 |                 | hsa.miR.134.5p  | 0.88559 |
|                 |                 | hsa.miR.379.5p  | 0.8779  |
|                 |                 | hsa.miR.493.3p  | 0.87754 |
|                 |                 | hsa.miR.889.3p  | 0.87683 |
| hsa.miR.127.3p  |                 | 0.87673         |         |
| hsa.miR.432.5p  |                 | 0.87539         |         |
| hsa.miR.493.5p  |                 | 0.86652         |         |
| hsa.miR.370.3p  |                 | 0.85972         |         |
| hsa.miR.654.3p  |                 | 0.85626         |         |
| hsa.miR.431.3p  |                 | 0.84675         |         |
| hsa.miR.410.3p  |                 | 0.82573         |         |
| hsa.miR.337.3p  |                 | 0.81909         |         |
| hsa.miR.485.3p  |                 | 0.80923         |         |
| hsa.miR.487b.3p | 0.8017          |                 |         |

|              |                 |                 |         |
|--------------|-----------------|-----------------|---------|
|              |                 | hsa.miR.127.5p  | 0.80004 |
| <b>KIRC</b>  | hsa.miR.144.5p  | hsa.miR.451a    | 0.94915 |
|              |                 | hsa.miR.486.5p  | 0.92824 |
|              | hsa.miR.489.3p  | hsa.miR.653.5p  | 0.81512 |
| <b>KIRP</b>  | hsa.miR.224.5p  | hsa.miR.452.5p  | 0.8625  |
|              | hsa.miR.542.5p  | hsa.miR.450b.5p | 0.82058 |
| <b>LIHCC</b> | hsa-miR-518b    | hsa-miR-512     | 0.88368 |
|              |                 | hsa-miR-525     | 0.88135 |
|              |                 | hsa-miR-517     | 0.88    |
|              |                 | hsa-miR-520a    | 0.87077 |
|              |                 | hsa-miR-526b    | 0.86433 |
|              |                 | hsa-miR-519a    | 0.85918 |
|              |                 | hsa-miR-516a    | 0.84481 |
|              |                 | hsa-miR-522     | 0.84263 |
|              |                 | hsa-miR-1323    | 0.80711 |
|              | hsa-miR-512     | hsa-miR-518b    | 0.87175 |
|              |                 | hsa-miR-525     | 0.86591 |
|              |                 | hsa-miR-520b    | 0.85993 |
|              |                 | hsa-miR-519a    | 0.85658 |
|              |                 | hsa-miR-522     | 0.85275 |
|              |                 | hsa-miR-516a    | 0.8434  |
|              |                 | hsa-miR-526b    | 0.84138 |
| hsa-miR-517a |                 | 0.83647         |         |
|              | hsa-miR-1323    | 0.82907         |         |
| <b>LUAD</b>  | hsa.miR.144.5p  | hsa.miR.451a    | 0.8937  |
|              | hsa.miR.376c.3p | hsa.miR.495.3p  | 0.8324  |
|              |                 | hsa.miR.487b.3p | 0.82167 |
|              |                 | hsa.miR.381.3p  | 0.82055 |
|              |                 | hsa.miR.382.5p  | 0.81617 |
|              |                 | hsa.miR.654.3p  | 0.81027 |
|              |                 | hsa.miR.889.3p  | 0.80956 |
|              |                 | hsa.miR.493.5p  | 0.80489 |
|              |                 | hsa.miR.134.5p  | 0.80376 |
|              |                 | hsa.miR.379.5p  | 0.80133 |
|              | hsa.miR.369.3p  | 0.8001          |         |
| <b>LUSC</b>  | NA              | NA              | NA      |
| <b>READ</b>  | hsa.miR.140.5p  | hsa.miR.126.3p  | 0.82597 |
|              | hsa.miR.200b.3p | hsa.miR.429     | 0.85611 |
| <b>SKCM</b>  | hsa.miR.194.5p  | hsa.miR.192.5p  | 0.83789 |
|              | hsa.miR.486.5p  | hsa.miR.451a    | 0.92664 |
|              |                 | hsa.miR.144.5p  | 0.80551 |
| <b>STAD</b>  | hsa.miR.141.5p  | hsa.miR.200c.3p | 0.8094  |
|              | hsa.miR.127.5p  | hsa.miR.134.5p  | 0.89068 |
|              |                 | hsa.miR.136.5p  | 0.86676 |

|                |                 |                |                |
|----------------|-----------------|----------------|----------------|
|                |                 | hsa.miR.409.5p | 0.83392        |
|                |                 | hsa.miR.337.3p | 0.82606        |
|                | hsa.miR.221.3p  | hsa.miR.222.3p | 0.89969        |
| <b>THCA</b>    | hsa.miR.199b.5p | hsa.miR.214.5p | 0.86736        |
|                |                 | hsa.miR.136.5p | 0.84914        |
|                |                 | hsa.miR.127.5p | 0.81443        |
|                | hsa.miR.514a.3p | hsa.miR.509.3p | 0.86009        |
|                |                 | hsa.miR.508.3p | 0.83453        |
|                | hsa.miR.192.5p  | hsa.miR.194.5p | 0.8509         |
|                |                 | hsa.miR.409.3p | 0.87451        |
|                |                 | hsa.miR.337.3p | 0.8741         |
|                |                 | hsa.miR.134.5p | 0.87061        |
|                |                 | hsa.miR.889.3p | 0.86136        |
|                |                 | hsa.miR.381.3p | 0.86114        |
|                |                 | hsa.miR.127.5p | 0.85932        |
|                |                 | hsa.miR.127.3p | 0.85734        |
|                |                 | hsa.miR.379.5p | 0.84578        |
|                |                 | hsa.miR.136.5p | 0.83969        |
|                |                 | hsa.miR.758.3p | 0.83922        |
|                |                 | hsa.miR.136.3p | 0.83552        |
|                |                 | hsa.miR.654.3p | 0.83144        |
|                |                 | hsa.miR.409.5p | 0.82336        |
| hsa.miR.493.5p |                 | 0.82297        |                |
| hsa.miR.410.3p |                 | 0.80161        |                |
| <b>UVM</b>     |                 | hsa.miR.224.5p | hsa.miR.452.5p |

Abbreviations: NA- Not Available.

**Supplementary Table S5.** Top-10 ranked miRNAs involvement in BLCA

| <b>Rank</b> | <b>BLCA</b>      | <b>Literature</b> |
|-------------|------------------|-------------------|
| Rank-1      | hsa-miR-31-3p    | 1                 |
| Rank-2      | hsa-miR-29b-2-5p | 2, 3              |
| Rank-3      | hsa-miR-193b-3p  | 4, 5              |
| Rank-4      | hsa-miR-10b-5p   | 6                 |
| Rank-5      | hsa-miR-125a-3p  | 7, 8              |
| Rank-6      | hsa-miR-136-5p   | -                 |
| Rank-7      | hsa-miR-3912-3p  | -                 |
| Rank-8      | hsa-miR-205-5p   | 9, 10             |
| Rank-9      | hsa-miR-337-3p   | 11                |
| Rank-10     | hsa-miR-29a-5p   | 12                |

**Supplementary Table S6.** Top-10 ranked miRNAs involvement in BRCA

| <b>Rank</b> | <b>BRCA</b>     | <b>Literature</b> |
|-------------|-----------------|-------------------|
| 1           | hsa-miR-200c-5p | 13, 14            |
| 2           | hsa-miR-503     | 15                |
| 3           | hsa-miR-1307-3p | 16                |
| 4           | hsa-miR-361-3p  | 17                |
| 5           | hsa-miR-212     | 18                |
| 6           | hsa-miR-592     | 19                |
| 7           | hsa-miR-1185-1  | -                 |
| 8           | hsa-miR-146b    | 20                |
| 9           | hsa-miR-1468-5p | -                 |
| 10          | hsa-miR-769-3p  | 21                |

**Supplementary Table S7.** Top-10 ranked miRNAs involvement in COAD

| <b>Rank</b> | <b>COAD</b>     | <b>Literature</b> |
|-------------|-----------------|-------------------|
| 1           | hsa-miR-188-3p  | 22                |
| 2           | hsa-miR-1976    | -                 |
| 3           | hsa-miR-320a    | 23                |
| 4           | hsa-miR-450b-5p | 24                |
| 5           | hsa-miR-140-3p  | 25                |
| 6           | hsa-miR-17-3p   | 26                |
| 7           | hsa-miR-301a-3p | 27                |
| 8           | hsa-miR-582-5p  | -                 |
| 9           | hsa-miR-491-3p  | 28                |
| 10          | hsa-miR-501-5p  | -                 |

**Supplementary Table S8.** Top-10 ranked miRNAs involvement in ESCA

| <b>Rank</b> | <b>ESCA</b>     | <b>Literature</b> |
|-------------|-----------------|-------------------|
| 1           | hsa-miR-708-5p  | 29, 30            |
| 2           | hsa-miR-199a-5p | 31, 32            |
| 3           | hsa-miR-33b-5p  | 33, 34            |
| 4           | hsa-miR-23a-3p  | 35                |
| 5           | hsa-miR-423-5p  | 36                |
| 6           | hsa-miR-193b-5p | 37                |
| 7           | hsa-miR-3677-3p | 38                |
| 8           | hsa-miR-362-3p  | 39                |
| 9           | hsa-miR-487b-3p | -                 |
| 10          | hsa-miR-508-3p  | 40                |

**Supplementary Table S9.** Top-10 ranked miRNAs involvement in HNSC

| <b>Rank</b> | <b>HNSC</b>       | <b>Literature</b> |
|-------------|-------------------|-------------------|
| 1           | hsa-miR-93-3p     | 41, 42            |
| 2           | hsa-miR-335-5p    | 43                |
| 3           | hsa-miR-219a-1-3p | -                 |
| 4           | hsa-miR-361-3p    | -                 |
| 5           | hsa-miR-493-3p    | 44                |
| 6           | hsa-miR-188-3p    | -                 |
| 7           | hsa-miR-3690      | 45                |
| 8           | hsa-miR-103a-3p   | 46                |
| 9           | hsa-miR-101-5p    | 47                |
| 10          | hsa-miR-206       | 48, 49            |

**Supplementary Table S10.** Top-10 ranked miRNAs involvement in KIRC

| <b>Rank</b> | <b>KIRC</b>     | <b>Literature</b> |
|-------------|-----------------|-------------------|
| 1           | hsa-miR-144-5p  | 50                |
| 2           | hsa-miR-744-5p  | -                 |
| 3           | hsa-miR-550a-3p | -                 |
| 4           | hsa-miR-1296-5p | -                 |
| 5           | hsa-let-7i-3p   | 51                |
| 6           | hsa-miR-18a-5p  | 52                |

|    |                |        |
|----|----------------|--------|
| 7  | hsa-miR-628-5p | -      |
| 8  | hsa-miR-197-3p | 51     |
| 9  | hsa-miR-222-5p | 53     |
| 10 | hsa-miR-126-3p | 54, 55 |

**Supplementary Table S11.** Top-10 ranked miRNAs involvement in KIRP

| <b>Rank</b> | <b>KIRP</b>     | <b>Literature</b> |
|-------------|-----------------|-------------------|
| 1           | hsa-miR-491-5p  | -                 |
| 2           | hsa-miR-769-5p  | 56                |
| 3           | hsa-miR-29c-5p  | -                 |
| 4           | hsa-miR-16-5p   | 57                |
| 5           | hsa-miR-200b-5p | 58                |
| 6           | hsa-miR-485-3p  | 59                |
| 7           | hsa-miR-22-5p   | 58                |
| 8           | hsa-miR-629-3p  | -                 |
| 9           | hsa-miR-320b    | 57                |
| 10          | hsa-miR-217     | 60                |

**Supplementary Table S12.** Top-10 ranked miRNAs involvement in LIHCC

| <b>Rank</b> | <b>LIHCC</b>   | <b>Literature</b> |
|-------------|----------------|-------------------|
| 1           | hsa-miR-550a-2 | 61                |
| 2           | hsa-miR-549    | -                 |
| 3           | hsa-miR-518b   | 62                |
| 4           | hsa-miR-512-2  | 63                |
| 5           | hsa-miR-1179   | 64                |
| 6           | hsa-miR-574-3p | 65                |
| 7           | hsa-miR-424-3p | 66                |
| 8           | hsa-miR-4286   | 67                |
| 9           | hsa-let-7i-3p  | 68                |
| 10          | hsa-miR-320a   | 69                |

**Supplementary Table S13.** Top-10 ranked miRNAs involvement in LUAD

| <b>Rank</b> | <b>LUAD</b> | <b>Literature</b> |
|-------------|-------------|-------------------|
|-------------|-------------|-------------------|

|    |                 |    |
|----|-----------------|----|
| 1  | hsa-miR-671-5p  | 70 |
| 2  | hsa-miR-3651    | 71 |
| 3  | hsa-miR-1304-5p | 72 |
| 4  | hsa-miR-342-3p  | 73 |
| 5  | hsa-miR-548v    | 74 |
| 6  | hsa-miR-296-3p  | 71 |
| 7  | hsa-miR-598-3p  | 75 |
| 8  | hsa-miR-190a-5p | -  |
| 9  | hsa-miR-144-5p  | 76 |
| 10 | hsa-miR-185-3p  | 76 |

**Supplementary Table S14.** Top-10 ranked miRNAs involvement in LUSC

| <b>Rank</b> | <b>LUSC</b>       | <b>Literature</b> |
|-------------|-------------------|-------------------|
| 1           | hsa-miR-181a-2-3p | 77                |
| 2           | hsa-miR-664a-3p   | -                 |
| 3           | hsa-miR-769-3p    | 78                |
| 4           | hsa-miR-29b-2-5p  | 79                |
| 5           | hsa-miR-3614-5p   | 80                |
| 6           | hsa-miR-214-3p    | 81                |
| 7           | hsa-miR-200c-5p   | 82, 83            |
| 8           | hsa-miR-3613-5p   | 84                |
| 9           | hsa-miR-196a-5p   | 85                |
| 10          | hsa-miR-551b-3p   | 86                |

**Supplementary Table S15.** Top-10 ranked miRNAs involvement in SKCM

| <b>Rank</b> | <b>SKCM</b>      | <b>Literature</b> |
|-------------|------------------|-------------------|
| 1           | hsa-miR-211-5p   | 87                |
| 2           | hsa-miR-194-5p   | 88                |
| 3           | hsa-miR-3614-5p  | -                 |
| 4           | hsa-miR-326      | -                 |
| 5           | hsa-miR-4326     | -                 |
| 6           | hsa-miR-1180-3p  | 89                |
| 7           | hsa-miR-664a-3p  | 90                |
| 8           | hsa-miR-26a-1-3p | 91                |
| 9           | hsa-miR-132-5p   | 92                |

|    |              |    |
|----|--------------|----|
| 10 | hsa-miR-1538 | 93 |
|----|--------------|----|

**Supplementary Table S16.** Top-10 ranked miRNAs involvement in STAD

| <b>Rank</b> | <b>STAD</b>     | <b>Literature</b> |
|-------------|-----------------|-------------------|
| 1           | hsa-miR-130a-3p | 94                |
| 2           | hsa-miR-320b    | 95, 96            |
| 3           | hsa-miR-141-5p  | 97                |
| 4           | hsa-miR-3065-5p | 98                |
| 5           | hsa-miR-887-3p  | -                 |
| 6           | hsa-miR-362-3p  | 99                |
| 7           | hsa-miR-135a-5p | 100               |
| 8           | hsa-miR-21-3p   | 101, 102          |
| 9           | hsa-miR-148b-3p | 103               |
| 10          | hsa-miR-580-3p  | -                 |

**Supplementary Table S17.** Top-10 ranked miRNAs involvement in THCA

| <b>Rank</b> | <b>THCA</b>      | <b>Literature</b> |
|-------------|------------------|-------------------|
| 1           | hsa-miR-940      | 104               |
| 2           | hsa-let-7i-5p    | 105               |
| 3           | hsa-miR-1249-3p  | 106               |
| 4           | hsa-miR-101-5p   | 107               |
| 5           | hsa-miR-874-3p   | 108               |
| 6           | hsa-miR-3605-3p  | -                 |
| 7           | hsa-miR-592      | -                 |
| 8           | hsa-miR-188-3p   | 109               |
| 9           | hsa-miR-30d-5p   | 110               |
| 10          | hsa-miR-218-1-3p | 111               |

**Supplementary Table S18.** Top-10 ranked miRNAs involvement in READ

| <b>Rank</b> | <b>READ</b>     | <b>Literature</b> |
|-------------|-----------------|-------------------|
| 1           | hsa-miR-10a-5p  | 112               |
| 2           | hsa-miR-9-5p    | 113               |
| 3           | hsa-miR-135b-3p | 114               |
| 4           | hsa-miR-491-5p  | 115               |



|    |                 |     |
|----|-----------------|-----|
| 5  | hsa-miR-31-3p   | 116 |
| 6  | hsa-miR-656-3p  | 117 |
| 7  | hsa-miR-140-5p  | 118 |
| 8  | hsa-miR-1269a   | 119 |
| 9  | hsa-miR-1468-5p | 120 |
| 10 | hsa-miR-935     | -   |

**Supplementary Table S19.** Top-10 ranked miRNAs involvement in UVM

| <b>Rank</b> | <b>UVM</b>      | <b>Literature</b> |
|-------------|-----------------|-------------------|
| 1           | hsa-miR-335-5p  | 121               |
| 2           | hsa-miR-192-3p  | 122               |
| 3           | hsa-miR-3687    | -                 |
| 4           | hsa-miR-664a-5p | 121               |
| 5           | hsa-miR-1247-5p | 123               |
| 6           | hsa-miR-3613-3p | -                 |
| 7           | hsa-let-7i-3p   | -                 |
| 8           | hsa-miR-224-5p  | 124               |
| 9           | hsa-miR-3917    | -                 |
| 10          | hsa-miR-20b-3p  | -                 |

**Supplementary Table S20.** MiRNAs that were not previously reported in cancers

| <b>Cancer type</b> | <b>miRNA previously not reported</b> | <b>Rank of the miRNA in the signature</b> |
|--------------------|--------------------------------------|-------------------------------------------|
| BLCA               | hsa-miR-136-5p                       | 6                                         |
|                    | hsa-miR-3912-3p                      | 7                                         |
| BRCA               | hsa-miR-1185-1                       | 7                                         |
|                    | hsa-miR-1468-5p                      | 9                                         |
| COAD               | hsa-miR-1976                         | 2                                         |
|                    | hsa-miR-582-5p                       | 8                                         |
|                    | hsa-miR-501-5p                       | 10                                        |
| ESCA               | hsa-miR-487b-3p                      | 9                                         |
| HNSC               | hsa-miR-219a-1-3p                    | 3                                         |
|                    | hsa-miR-361-3p                       | 4                                         |
|                    | hsa-miR-188-3p                       | 6                                         |
| KIRC               | hsa-miR-744-5p                       | 3                                         |
|                    | hsa-miR-550a-3p                      | 4                                         |
|                    | hsa-miR-1296-5p                      | 5                                         |
|                    | hsa-miR-628-5p                       | 7                                         |
| KIRP               | hsa-miR-491-5p                       | 1                                         |

|       |                 |    |
|-------|-----------------|----|
|       | hsa-miR-29c-5p  | 3  |
|       | hsa-miR-629-3p  | 8  |
| LIHCC | hsa-miR-549     | 2  |
| LUAD  | hsa-miR-190a-5p | 8  |
| LUSC  | hsa-miR-664a-3p | 2  |
| SKCM  | hsa-miR-3614-5p | 3  |
|       | hsa-miR-326     | 4  |
|       | hsa-miR-4326    | 5  |
| STAD  | hsa-miR-887-3p  | 5  |
|       | hsa-miR-580-3p  | 10 |
| THCA  | hsa-miR-3605-3p | 6  |
|       | hsa-miR-592     | 7  |
| READ  | hsa-miR-935     | 10 |
| UVM   | hsa-miR-3687    | 3  |
|       | hsa-miR-3613-3p | 6  |
|       | hsa-let-7i-3p   | 7  |
|       | hsa-miR-3917    | 9  |
|       | hsa-miR-20b-3p  | 10 |

**Supplementary Table S21.** KEGG pathway analysis of miRNA signatures across 15 cancers

| Cancer | KEGG pathway                                             | p-value  |
|--------|----------------------------------------------------------|----------|
| BLCA   | Proteoglycans in cancer                                  | 5.55E-11 |
|        | Glioma                                                   | 1.08E-06 |
|        | ECM-receptor interaction                                 | 1.66E-06 |
|        | ErbB signaling pathway                                   | 2.95E-06 |
|        | Axon guidance                                            | 8.06E-06 |
|        | Signaling pathways regulating pluripotency of stem cells | 8.53E-06 |
|        | Phosphatidylinositol signaling system                    | 1.6E-05  |
|        | Renal cell carcinoma                                     | 6.8E-05  |
|        | Prion diseases                                           | 0.00011  |
|        | Neurotrophin signaling pathway                           | 0.00015  |
|        | Acute myeloid leukemia                                   | 0.00057  |
|        | mTOR signaling pathway                                   | 0.00084  |
|        | TGF-beta signaling pathway                               | 0.00084  |
|        | Pathways in cancer                                       | 0.00084  |
|        | Ras signaling pathway                                    | 0.00093  |
|        | Hippo signaling pathway                                  | 0.00093  |
|        | Focal adhesion                                           | 0.00093  |
|        | Colorectal cancer                                        | 0.00123  |
|        | Endometrial cancer                                       | 0.00134  |
|        | Rap1 signaling pathway                                   | 0.00178  |

|             |                                                          |          |
|-------------|----------------------------------------------------------|----------|
|             | Choline metabolism in cancer                             | 0.00246  |
|             | Prolactin signaling pathway                              | 0.00248  |
|             | Circadian rhythm                                         | 0.00307  |
|             | Gap junction                                             | 0.00324  |
|             | Prostate cancer                                          | 0.00324  |
|             | Wnt signaling pathway                                    | 0.00324  |
|             | T cell receptor signaling pathway                        | 0.004    |
|             | Melanoma                                                 | 0.00468  |
|             | AMPK signaling pathway                                   | 0.00468  |
| <b>BRCA</b> | KEGG pathway                                             | p-value  |
|             | Mucin type O-Glycan biosynthesis                         | 3.02E-15 |
|             | Proteoglycans in cancer                                  | 6.30E-13 |
|             | Hippo signaling pathway                                  | 2.01E-09 |
|             | ECM-receptor interaction                                 | 4.29E-09 |
|             | Signaling pathways regulating pluripotency of stem cells | 6.02E-07 |
|             | FoxO signaling pathway                                   | 1.03E-05 |
|             | TGF-beta signaling pathway                               | 1.25E-05 |
|             | Renal cell carcinoma                                     | 1.34E-05 |
|             | Focal adhesion                                           | 1.51E-05 |
|             | Axon guidance                                            | 1.88E-05 |
|             | Adherens junction                                        | 7.60E-05 |
|             | Wnt signaling pathway                                    | 7.60E-05 |
|             | Rap1 signaling pathway                                   | 8.12E-05 |
|             | Prion diseases                                           | 9.47E-05 |
|             | Glioma                                                   | 0.00012  |
|             | Ras signaling pathway                                    | 0.00032  |
|             | MAPK signaling pathway                                   | 0.00037  |
|             | Thyroid hormone signaling pathway                        | 0.00107  |
|             | Endocytosis                                              | 0.00144  |
|             | Pathways in cancer                                       | 0.00161  |
|             | Circadian rhythm                                         | 0.00212  |
|             | Choline metabolism in cancer                             | 0.00212  |
|             | ErbB signaling pathway                                   | 0.00212  |
|             | Melanoma                                                 | 0.0032   |
|             | Bacterial invasion of epithelial cells                   | 0.00377  |
| <b>COAD</b> | Morphine addiction                                       | 2.04E-07 |
|             | Signaling pathways regulating pluripotency of stem cells | 5.03E-07 |
|             | Prion diseases                                           | 2.95E-06 |
|             | Proteoglycans in cancer                                  | 2.95E-06 |

|             |                                                          |          |
|-------------|----------------------------------------------------------|----------|
|             | Glutamatergic synapse                                    | 6E-06    |
|             | Axon guidance                                            | 6E-06    |
|             | Transcriptional misregulation in cancer                  | 1.8E-05  |
|             | Adrenergic signaling in cardiomyocytes                   | 2.9E-05  |
|             | Hippo signaling pathway                                  | 0.00017  |
|             | Wnt signaling pathway                                    | 0.00027  |
|             | Long-term depression                                     | 0.00034  |
|             | Glioma                                                   | 0.00034  |
|             | FoxO signaling pathway                                   | 0.00044  |
|             | Amphetamine addiction                                    | 0.00054  |
|             | Circadian rhythm                                         | 0.00063  |
|             | Estrogen signaling pathway                               | 0.00064  |
|             | cAMP signaling pathway                                   | 0.00075  |
|             | Oxytocin signaling pathway                               | 0.00075  |
|             | Focal adhesion                                           | 0.00085  |
|             | TGF-beta signaling pathway                               | 0.00089  |
|             | Retrograde endocannabinoid signaling                     | 0.00106  |
|             | Regulation of actin cytoskeleton                         | 0.00167  |
|             | Renal cell carcinoma                                     | 0.00257  |
|             | Colorectal cancer                                        | 0.00305  |
|             | Dopaminergic synapse                                     | 0.00399  |
| <b>ESCA</b> | Axon guidance                                            | 3.30E-05 |
|             | FoxO signaling pathway                                   | 3.30E-05 |
|             | Glioma                                                   | 3.30E-05 |
|             | Long-term depression                                     | 5.83E-05 |
|             | GABAergic synapse                                        | 8.00E-05 |
|             | Glutamatergic synapse                                    | 0.00021  |
|             | Non-small cell lung cancer                               | 0.00035  |
|             | Renal cell carcinoma                                     | 0.00035  |
|             | Phosphatidylinositol signaling system                    | 0.00056  |
|             | Gap junction                                             | 0.00056  |
|             | Aldosterone-regulated sodium reabsorption                | 0.0007   |
|             | Morphine addiction                                       | 0.00112  |
|             | TGF-beta signaling pathway                               | 0.0013   |
|             | Retrograde endocannabinoid signaling                     | 0.0013   |
|             | Prolactin signaling pathway                              | 0.00138  |
|             | ErbB signaling pathway                                   | 0.00138  |
|             | Circadian rhythm                                         | 0.00154  |
|             | Thyroid hormone signaling pathway                        | 0.00154  |
|             | Signaling pathways regulating pluripotency of stem cells | 0.00154  |

|             |                                                          |          |
|-------------|----------------------------------------------------------|----------|
|             | Proteoglycans in cancer                                  | 0.00195  |
|             | Oxytocin signaling pathway                               | 0.00251  |
|             | Adrenergic signaling in cardiomyocytes                   | 0.00295  |
|             | Estrogen signaling pathway                               | 0.00295  |
|             | Platelet activation                                      | 0.00342  |
|             | MAPK signaling pathway                                   | 0.00387  |
|             | Melanoma                                                 | 0.00405  |
|             | Ras signaling pathway                                    | 0.0041   |
|             | Long-term potentiation                                   | 0.00435  |
| <b>HNSC</b> | Prion diseases                                           | 9.28E-08 |
|             | Proteoglycans in cancer                                  | 9.28E-08 |
|             | Fatty acid biosynthesis                                  | 1.22E-06 |
|             | cGMP-PKG signaling pathway                               | 0.00022  |
|             | Adherens junction                                        | 0.00038  |
|             | Adrenergic signaling in cardiomyocytes                   | 0.00042  |
|             | Gap junction                                             | 0.00068  |
|             | AMPK signaling pathway                                   | 0.00068  |
|             | Rap1 signaling pathway                                   | 0.00068  |
|             | Signaling pathways regulating pluripotency of stem cells | 0.00072  |
|             | GABAergic synapse                                        | 0.00186  |
|             | Hippo signaling pathway                                  | 0.00212  |
|             | Morphine addiction                                       | 0.00237  |
|             | Circadian entrainment                                    | 0.00237  |
|             | Oxytocin signaling pathway                               | 0.00237  |
|             | Vascular smooth muscle contraction                       | 0.00266  |
|             | Ubiquitin mediated proteolysis                           | 0.00312  |
|             | Lysine degradation                                       | 0.00312  |
|             | Ras signaling pathway                                    | 0.00312  |
|             | Axon guidance                                            | 0.00392  |
|             | Pancreatic cancer                                        | 0.00467  |
| <b>KIRC</b> | Prion diseases                                           | 1.98E-10 |
|             | Proteoglycans in cancer                                  | 7.53E-07 |
|             | Glioma                                                   | 2.30E-06 |
|             | ErbB signaling pathway                                   | 5.38E-06 |
|             | Ras signaling pathway                                    | 6.23E-05 |
|             | ECM-receptor interaction                                 | 0.00123  |
|             | Amphetamine addiction                                    | 0.00129  |
|             | Focal adhesion                                           | 0.00129  |
|             | TGF-beta signaling pathway                               | 0.00159  |
|             | Renal cell carcinoma                                     | 0.00159  |

|              |                                                          |          |
|--------------|----------------------------------------------------------|----------|
|              | Rap1 signaling pathway                                   | 0.00159  |
|              | Gap junction                                             | 0.00214  |
|              | Estrogen signaling pathway                               | 0.00214  |
|              | Long-term potentiation                                   | 0.00214  |
|              | PI3K-Akt signaling pathway                               | 0.00214  |
|              | Axon guidance                                            | 0.00236  |
|              | Lysine degradation                                       | 0.00248  |
|              | Phosphatidylinositol signaling system                    | 0.0027   |
|              | Dorso-ventral axis formation                             | 0.00276  |
|              | Choline metabolism in cancer                             | 0.00336  |
|              | Mucin type O-Glycan biosynthesis                         | 0.00381  |
|              | Signaling pathways regulating pluripotency of stem cells | 0.00442  |
| <b>KIRP</b>  | Fatty acid biosynthesis                                  | 1.27E-17 |
|              | Signaling pathways regulating pluripotency of stem cells | 1.67E-09 |
|              | Proteoglycans in cancer                                  | 1.21E-08 |
|              | Prolactin signaling pathway                              | 1.73E-06 |
|              | Hippo signaling pathway                                  | 1.81E-06 |
|              | Prostate cancer                                          | 0.00011  |
|              | FoxO signaling pathway                                   | 0.00013  |
|              | Rap1 signaling pathway                                   | 0.00017  |
|              | Melanoma                                                 | 0.00026  |
|              | Pathways in cancer                                       | 0.0003   |
|              | Long-term depression                                     | 0.00035  |
|              | PI3K-Akt signaling pathway                               | 0.00056  |
|              | Endometrial cancer                                       | 0.00066  |
|              | Glioma                                                   | 0.00066  |
|              | Thyroid cancer                                           | 0.00084  |
|              | Colorectal cancer                                        | 0.00092  |
|              | Estrogen signaling pathway                               | 0.00114  |
|              | TGF-beta signaling pathway                               | 0.00208  |
|              | Non-small cell lung cancer                               | 0.00227  |
|              | AMPK signaling pathway                                   | 0.00463  |
| <b>LIHCC</b> | Fatty acid biosynthesis                                  | 2.61E-12 |
|              | ECM-receptor interaction                                 | 1.63E-11 |
|              | Fatty acid metabolism                                    | 2.79E-11 |
|              | Hepatitis B                                              | 3.58E-09 |
|              | Glioma                                                   | 2.90E-08 |
|              | Proteoglycans in cancer                                  | 1.11E-07 |
|              | Lysine degradation                                       | 3.32E-07 |

|             |                                                            |          |
|-------------|------------------------------------------------------------|----------|
|             | Hippo signaling pathway                                    | 1.95E-06 |
|             | Pathways in cancer                                         | 4.2E-06  |
|             | Viral carcinogenesis                                       | 5.37E-06 |
|             | TGF-beta signaling pathway                                 | 9.14E-06 |
|             | Estrogen signaling pathway                                 | 1.7E-05  |
|             | Chronic myeloid leukemia                                   | 3.9E-05  |
|             | Prostate cancer                                            | 0.00011  |
|             | Renal cell carcinoma                                       | 0.00015  |
|             | Adherens junction                                          | 0.00076  |
|             | Fatty acid elongation                                      | 0.00081  |
|             | Prion diseases                                             | 0.00139  |
|             | Endocytosis                                                | 0.00141  |
| <b>LUAD</b> | Fatty acid biosynthesis                                    | 7.47E-10 |
|             | Axon guidance                                              | 9.10E-08 |
|             | Signaling pathways regulating pluripotency of stem cells   | 6.07E-06 |
|             | TGF-beta signaling pathway                                 | 9.26E-06 |
|             | Proteoglycans in cancer                                    | 9.26E-06 |
|             | Amphetamine addiction                                      | 4.99E-05 |
|             | Pathways in cancer                                         | 4.99E-05 |
|             | Hippo signaling pathway                                    | 9.75E-05 |
|             | Transcriptional misregulation in cancer                    | 9.75E-05 |
|             | Thyroid hormone signaling pathway                          | 0.00046  |
|             | Ubiquitin mediated proteolysis                             | 0.00053  |
|             | N-Glycan biosynthesis                                      | 0.00209  |
|             | Glycosphingolipid biosynthesis - ganglio series            | 0.00221  |
|             | Adherens junction                                          | 0.00221  |
|             | Circadian rhythm                                           | 0.0023   |
|             | Rap1 signaling pathway                                     | 0.0027   |
|             | Arrhythmogenic right ventricular cardiomyopathy (ARVC)     | 0.00389  |
| <b>LUSC</b> | Glycosphingolipid biosynthesis - lacto and neolacto series | 7.01E-13 |
|             | Prion diseases                                             | 1.70E-06 |
|             | Proteoglycans in cancer                                    | 2.28E-06 |
|             | TGF-beta signaling pathway                                 | 2.92E-06 |
|             | Mucin type O-Glycan biosynthesis                           | 1.35E-05 |
|             | Signaling pathways regulating pluripotency of stem cells   | 1.35E-05 |
|             | ErbB signaling pathway                                     | 2.03E-05 |
|             | mTOR signaling pathway                                     | 6.97E-05 |

|             |                                                          |          |
|-------------|----------------------------------------------------------|----------|
|             | FoxO signaling pathway                                   | 0.0009   |
| <b>READ</b> | GABAergic synapse                                        | 1.25E-06 |
|             | Thyroid hormone signaling pathway                        | 1.25E-06 |
|             | Estrogen signaling pathway                               | 1.25E-06 |
|             | Axon guidance                                            | 5.97E-05 |
|             | Proteoglycans in cancer                                  | 5.97E-05 |
|             | ErbB signaling pathway                                   | 0.00033  |
|             | Prolactin signaling pathway                              | 0.00033  |
|             | Renal cell carcinoma                                     | 0.00033  |
|             | Adrenergic signaling in cardiomyocytes                   | 0.00037  |
|             | Morphine addiction                                       | 0.0012   |
|             | Ras signaling pathway                                    | 0.00208  |
|             | Phosphatidylinositol signaling system                    | 0.0021   |
|             | Cocaine addiction                                        | 0.00238  |
|             | Pancreatic cancer                                        | 0.00238  |
|             | Signaling pathways regulating pluripotency of stem cells | 0.00238  |
|             | Mucin type O-Glycan biosynthesis                         | 0.0027   |
|             | Rap1 signaling pathway                                   | 0.00374  |
|             | Biotin metabolism                                        | 0.00421  |
|             | Long-term depression                                     | 0.00421  |
|             | Focal adhesion                                           | 0.00421  |
|             | Pathways in cancer                                       | 0.00421  |
|             | Neurotrophin signaling pathway                           | 0.00483  |
|             | Oxytocin signaling pathway                               | 0.00483  |
| <b>SKCM</b> | Fatty acid biosynthesis                                  | 6.12E-11 |
|             | Fatty acid metabolism                                    | 6.12E-11 |
|             | ECM-receptor interaction                                 | 6.12E-11 |
|             | Proteoglycans in cancer                                  | 1.53E-07 |
|             | Signaling pathways regulating pluripotency of stem cells | 1.3E-05  |
|             | FoxO signaling pathway                                   | 8.6E-05  |
|             | Glioma                                                   | 0.0001   |
|             | ErbB signaling pathway                                   | 0.00014  |
|             | Endometrial cancer                                       | 0.00014  |
|             | Hippo signaling pathway                                  | 0.00037  |
|             | Pathways in cancer                                       | 0.00041  |
|             | Focal adhesion                                           | 0.00052  |
|             | Thyroid hormone signaling pathway                        | 0.00075  |
|             | PI3K-Akt signaling pathway                               | 0.00075  |
|             | mTOR signaling pathway                                   | 0.00084  |



|             |                                                           |          |
|-------------|-----------------------------------------------------------|----------|
|             | Colorectal cancer                                         | 0.00086  |
|             | Long-term depression                                      | 0.00086  |
|             | Wnt signaling pathway                                     | 0.00086  |
|             | Melanoma                                                  | 0.00086  |
|             | Choline metabolism in cancer                              | 0.00123  |
|             | Arrhythmogenic right ventricular cardiomyopathy (ARVC)    | 0.00178  |
|             | Adrenergic signaling in cardiomyocytes                    | 0.00266  |
|             | TGF-beta signaling pathway                                | 0.0029   |
|             | Prostate cancer                                           | 0.00298  |
|             | Thyroid cancer                                            | 0.00373  |
|             | Neurotrophin signaling pathway                            | 0.00475  |
|             | Oxytocin signaling pathway                                | 0.00475  |
| <b>STAD</b> | ECM-receptor interaction                                  | 5.52E-10 |
|             | Renal cell carcinoma                                      | 6.37E-07 |
|             | Ras signaling pathway                                     | 7.78E-07 |
|             | Axon guidance                                             | 7.78E-07 |
|             | Pathways in cancer                                        | 8.76E-07 |
|             | Proteoglycans in cancer                                   | 3.33E-06 |
|             | Prion diseases                                            | 7.68E-06 |
|             | Adherens junction                                         | 7.68E-06 |
|             | Long-term depression                                      | 9.64E-06 |
|             | ErbB signaling pathway                                    | 9.64E-06 |
|             | Hippo signaling pathway                                   | 1.21E-05 |
|             | FoxO signaling pathway                                    | 1.67E-05 |
|             | TGF-beta signaling pathway                                | 1.76E-05 |
|             | Focal adhesion                                            | 1.76E-05 |
|             | Glioma                                                    | 5.42E-05 |
|             | Choline metabolism in cancer                              | 0.00019  |
|             | Chronic myeloid leukemia                                  | 0.00023  |
|             | Signaling pathways regulating pluripotency of stem cells  | 0.00023  |
|             | Prolactin signaling pathway                               | 0.00023  |
|             | Colorectal cancer                                         | 0.00028  |
|             | Mucin type O-Glycan biosynthesis                          | 0.00046  |
|             | Pancreatic cancer                                         | 0.00046  |
|             | Endocrine and other factor-regulated calcium reabsorption | 0.00049  |
|             | Melanoma                                                  | 0.00053  |
|             | PI3K-Akt signaling pathway                                | 0.0006   |
|             | Rap1 signaling pathway                                    | 0.00118  |

|             |                                                           |          |
|-------------|-----------------------------------------------------------|----------|
|             | Circadian rhythm                                          | 0.00174  |
|             | Thyroid hormone signaling pathway                         | 0.0022   |
|             | Regulation of actin cytoskeleton                          | 0.00398  |
|             | Prostate cancer                                           | 0.00398  |
|             | cGMP-PKG signaling pathway                                | 0.00497  |
| <b>THCA</b> | Prion diseases                                            | 1.49E-07 |
|             | Proteoglycans in cancer                                   | 1.48E-06 |
|             | Axon guidance                                             | 6.31E-06 |
|             | Glutamatergic synapse                                     | 6.63E-05 |
|             | Signaling pathways regulating pluripotency of stem cells  | 0.00016  |
|             | Long-term depression                                      | 0.0002   |
|             | Morphine addiction                                        | 0.0002   |
|             | ErbB signaling pathway                                    | 0.0002   |
|             | FoxO signaling pathway                                    | 0.00025  |
|             | TGF-beta signaling pathway                                | 0.00033  |
|             | Transcriptional misregulation in cancer                   | 0.00038  |
|             | Chronic myeloid leukemia                                  | 0.00099  |
|             | Ubiquitin mediated proteolysis                            | 0.00218  |
|             | Retrograde endocannabinoid signaling                      | 0.00242  |
|             | Renal cell carcinoma                                      | 0.0026   |
|             | cGMP-PKG signaling pathway                                | 0.00265  |
|             | Regulation of actin cytoskeleton                          | 0.00265  |
|             | Glioma                                                    | 0.00273  |
|             | Glycosaminoglycan biosynthesis - keratan sulfate          | 0.00433  |
| <b>UVM</b>  | Hippo signaling pathway                                   | 5.37E-12 |
|             | Signaling pathways regulating pluripotency of stem cells  | 9.55E-11 |
|             | Pathways in cancer                                        | 2.24E-07 |
|             | Ubiquitin mediated proteolysis                            | 3.48E-06 |
|             | Thyroid hormone signaling pathway                         | 3.48E-06 |
|             | Transcriptional misregulation in cancer                   | 3.48E-06 |
|             | Proteoglycans in cancer                                   | 3.48E-06 |
|             | Renal cell carcinoma                                      | 4.88E-06 |
|             | Wnt signaling pathway                                     | 1.03E-05 |
|             | Axon guidance                                             | 1.47E-05 |
|             | FoxO signaling pathway                                    | 1.58E-05 |
|             | Phosphatidylinositol signaling system                     | 4.56E-05 |
|             | Adherens junction                                         | 0.00012  |
|             | Endocrine and other factor-regulated calcium reabsorption | 0.00014  |

|                                             |         |
|---------------------------------------------|---------|
| Circadian rhythm                            | 0.00015 |
| TGF-beta signaling pathway                  | 0.0004  |
| Rap1 signaling pathway                      | 0.0004  |
| AMPK signaling pathway                      | 0.00071 |
| Long-term depression                        | 0.00103 |
| Ras signaling pathway                       | 0.00165 |
| Colorectal cancer                           | 0.00188 |
| mRNA surveillance pathway                   | 0.002   |
| Morphine addiction                          | 0.00202 |
| MAPK signaling pathway                      | 0.00304 |
| Sphingolipid signaling pathway              | 0.00331 |
| Cholinergic synapse                         | 0.00485 |
| Protein processing in endoplasmic reticulum | 0.00591 |

**Supplementary Table S22.** GO category analysis of miRNA signatures across 15 cancers

| <b>Cancer</b> | <b>GO Category</b>                                   | <b>genes</b> | <b>miRNAs</b> | <b>p-value</b> |
|---------------|------------------------------------------------------|--------------|---------------|----------------|
| <b>BLCA</b>   | cellular_component                                   | 3963         | 9             | 7.55E-19       |
|               | protein binding transcription factor activity        | 173          | 10            | 8.66E-18       |
|               | protein complex                                      | 1074         | 10            | 3.84E-17       |
|               | epidermal growth factor receptor signaling pathway   | 95           | 12            | 4.88E-17       |
|               | enzyme binding                                       | 457          | 12            | 5.25E-17       |
|               | molecular_function                                   | 5054         | 14            | 7.98E-17       |
|               | gene expression                                      | 217          | 14            | 2.00E-16       |
|               | Fc-epsilon receptor signaling pathway                | 91           | 15            | 2.60E-16       |
|               | nucleic acid binding transcription factor activity   | 379          | 16            | 5.40E-16       |
|               | neurotrophin TRK receptor signaling pathway          | 127          | 16            | 6.64E-16       |
|               | cellular protein modification process                | 927          | 19            | 8.01E-16       |
|               | biosynthetic process                                 | 1518         | 23            | 8.67E-16       |
|               | cellular nitrogen compound metabolic process         | 1839         | 23            | 9.21E-16       |
|               | ion binding                                          | 2413         | 23            | 9.50E-16       |
|               | organelle                                            | 3878         | 28            | 1.06E-15       |
|               | cytosol                                              | 790          | 11            | 1.67E-15       |
|               | nucleoplasm                                          | 336          | 9             | 1.37E-12       |
|               | transcription, DNA-templated                         | 458          | 7             | 1.07E-11       |
|               | cellular component assembly                          | 349          | 7             | 1.16E-09       |
|               | fibroblast growth factor receptor signaling pathway  | 71           | 9             | 1.02E-08       |
|               | symbiosis, encompassing mutualism through parasitism | 130          | 5             | 3.18E-08       |
|               | small molecule metabolic process                     | 541          | 8             | 9.61E-08       |
|               | biological_process                                   | 3279         | 7             | 9.70E-08       |

|             |                                                      |      |   |          |
|-------------|------------------------------------------------------|------|---|----------|
|             | viral process                                        | 119  | 5 | 1.29E-07 |
|             | catabolic process                                    | 335  | 4 | 2.13E-07 |
|             | cytoskeletal protein binding                         | 200  | 7 | 2.00E-06 |
|             | cell death                                           | 237  | 6 | 5.99E-06 |
|             | blood coagulation                                    | 118  | 5 | 7.45E-06 |
|             | phosphatidylinositol-mediated signaling              | 51   | 8 | 7.85E-06 |
|             | response to stress                                   | 433  | 6 | 3.51E-05 |
|             | mitotic cell cycle                                   | 69   | 3 | 7.20E-05 |
|             | macromolecular complex assembly                      | 217  | 6 | 0.00022  |
|             | synaptic transmission                                | 93   | 4 | 0.004    |
|             | toll-like receptor 10 signaling pathway              | 26   | 4 | 0.00438  |
|             | nucleobase-containing compound catabolic process     | 150  | 3 | 0.00486  |
| <b>BRCA</b> | mitotic cell cycle                                   | 87   | 5 | <1E-325  |
|             | cellular protein modification process                | 329  | 5 | <1E-325  |
|             | biological_process                                   | 1365 | 5 | <1E-325  |
|             | viral process                                        | 108  | 5 | <1E-325  |
|             | small molecule metabolic process                     | 287  | 5 | <1E-325  |
|             | symbiosis, encompassing mutualism through parasitism | 119  | 5 | <1E-325  |
|             | membrane organization                                | 113  | 5 | <1E-325  |
|             | biosynthetic process                                 | 528  | 6 | <1E-325  |
|             | gene expression                                      | 157  | 6 | <1E-325  |
|             | cellular nitrogen compound metabolic process         | 684  | 8 | <1E-326  |
|             | catabolic process                                    | 225  | 3 | 8.33E-15 |
|             | cellular component assembly                          | 190  | 7 | 5.48E-14 |
|             | response to stress                                   | 242  | 3 | 6.43E-14 |
|             | macromolecular complex assembly                      | 133  | 6 | 4.60E-12 |
|             | nucleobase-containing compound catabolic process     | 131  | 5 | 1.16E-11 |
|             | mRNA metabolic process                               | 52   | 4 | 1.37E-11 |
|             | RNA metabolic process                                | 54   | 4 | 5.92E-11 |
|             | neurotrophin TRK receptor signaling pathway          | 43   | 3 | 1.04E-10 |
|             | cellular protein metabolic process                   | 73   | 5 | 4.98E-09 |
|             | cellular lipid metabolic process                     | 30   | 3 | 3.64E-07 |
|             | Fc-epsilon receptor signaling pathway                | 29   | 4 | 4.47E-07 |
|             | protein complex assembly                             | 101  | 5 | 5.38E-07 |
|             | DNA metabolic process                                | 93   | 3 | 1.52E-05 |
|             | cell death                                           | 123  | 4 | 2.56E-05 |
|             | viral life cycle                                     | 24   | 4 | 5.19E-05 |
|             | transcription, DNA-templated                         | 119  | 2 | 0.00113  |
|             | epidermal growth factor receptor signaling pathway   | 25   | 2 | 0.00223  |

|             |                                                          |      |    |          |
|-------------|----------------------------------------------------------|------|----|----------|
|             | transcription initiation from RNA polymerase II promoter | 21   | 2  | 0.00406  |
|             | G2/M transition of mitotic cell cycle                    | 23   | 2  | 0.00438  |
| <b>COAD</b> | biological_process                                       | 3548 | 7  | 6.51E-22 |
|             | nucleoplasm                                              | 316  | 8  | 8.67E-22 |
|             | neurotrophin TRK receptor signaling pathway              | 83   | 8  | 3.40E-20 |
|             | nucleic acid binding transcription factor activity       | 317  | 9  | 8.46E-20 |
|             | cellular_component                                       | 3941 | 9  | 9.60E-20 |
|             | transcription, DNA-templated                             | 611  | 9  | 5.71E-18 |
|             | enzyme binding                                           | 401  | 9  | 9.21E-18 |
|             | protein binding transcription factor activity            | 180  | 10 | 2.57E-17 |
|             | molecular_function                                       | 4155 | 11 | 5.57E-17 |
|             | protein complex                                          | 1102 | 11 | 2.99E-16 |
|             | gene expression                                          | 219  | 12 | 4.78E-16 |
|             | cellular protein modification process                    | 766  | 13 | 5.09E-16 |
|             | biosynthetic process                                     | 1364 | 15 | 6.27E-16 |
|             | ion binding                                              | 1982 | 16 | 6.84E-16 |
|             | cellular nitrogen compound metabolic process             | 1696 | 18 | 8.43E-15 |
|             | organelle                                                | 3396 | 19 | 6.10E-14 |
|             | mitotic cell cycle                                       | 104  | 7  | 8.20E-14 |
|             | cellular component assembly                              | 244  | 5  | 3.71E-13 |
|             | cytosol                                                  | 538  | 5  | 2.85E-12 |
|             | Fc-epsilon receptor signaling pathway                    | 52   | 7  | 3.27E-12 |
|             | cytoskeletal protein binding                             | 218  | 8  | 5.12E-12 |
|             | catabolic process                                        | 492  | 9  | 6.00E-12 |
|             | macromolecular complex assembly                          | 196  | 7  | 2.70E-10 |
|             | blood coagulation                                        | 103  | 4  | 4.08E-09 |
|             | nucleobase-containing compound catabolic process         | 198  | 6  | 6.11E-09 |
|             | epidermal growth factor receptor signaling pathway       | 66   | 6  | 1.15E-08 |
|             | RNA binding                                              | 399  | 7  | 3.38E-08 |
|             | small molecule metabolic process                         | 430  | 6  | 3.94E-07 |
|             | symbiosis, encompassing mutualism through parasitism     | 130  | 5  | 2.19E-06 |
|             | viral process                                            | 113  | 5  | 4.88E-06 |
|             | protein complex assembly                                 | 133  | 5  | 3.17E-05 |
|             | synaptic transmission                                    | 89   | 4  | 0.0001   |
|             | fibroblast growth factor receptor signaling pathway      | 53   | 6  | 0.00025  |
|             | enzyme regulator activity                                | 169  | 4  | 0.00033  |
|             | cell death                                               | 174  | 4  | 0.00068  |
|             | regulation of transcription, DNA-templated               | 62   | 1  | 0.00069  |
|             | microtubule organizing center                            | 90   | 4  | 0.00104  |

|             |                                                     |      |    |          |
|-------------|-----------------------------------------------------|------|----|----------|
|             | response to stress                                  | 357  | 4  | 0.00317  |
|             | nucleic acid binding                                | 54   | 1  | 0.0032   |
|             | cell-cell signaling                                 | 103  | 3  | 0.00486  |
| <b>ESCA</b> | cellular_component                                  | 3045 | 7  | 2.89E-23 |
|             | molecular_function                                  | 3396 | 8  | 6.40E-22 |
|             | nucleic acid binding transcription factor activity  | 291  | 9  | 1.99E-20 |
|             | gene expression                                     | 159  | 9  | 4.53E-18 |
|             | neurotrophin TRK receptor signaling pathway         | 96   | 10 | 6.16E-18 |
|             | cellular protein modification process               | 676  | 11 | 9.60E-18 |
|             | biosynthetic process                                | 1067 | 12 | 5.57E-17 |
|             | ion binding                                         | 1681 | 12 | 5.69E-17 |
|             | cellular nitrogen compound metabolic process        | 1430 | 16 | 2.65E-16 |
|             | organelle                                           | 2841 | 16 | 3.32E-16 |
|             | transcription, DNA-templated                        | 375  | 5  | 5.55E-16 |
|             | enzyme binding                                      | 328  | 7  | 1.48E-14 |
|             | Fc-epsilon receptor signaling pathway               | 50   | 4  | 6.93E-12 |
|             | protein binding transcription factor activity       | 131  | 7  | 3.20E-08 |
|             | protein complex                                     | 600  | 4  | 3.97E-08 |
|             | epidermal growth factor receptor signaling pathway  | 65   | 4  | 5.19E-08 |
|             | biological_process                                  | 2825 | 6  | 4.89E-07 |
|             | nucleoplasm                                         | 270  | 6  | 4.94E-07 |
|             | catabolic process                                   | 275  | 4  | 1.30E-06 |
|             | blood coagulation                                   | 120  | 7  | 1.60E-06 |
|             | synaptic transmission                               | 107  | 6  | 1.65E-06 |
|             | cellular component assembly                         | 248  | 4  | 2.02E-05 |
|             | small molecule metabolic process                    | 299  | 4  | 3.66E-05 |
|             | cytosol                                             | 370  | 3  | 0.00036  |
|             | fibroblast growth factor receptor signaling pathway | 54   | 5  | 0.00097  |
|             | enzyme regulator activity                           | 120  | 2  | 0.00131  |
|             | post-translational protein modification             | 36   | 2  | 0.00211  |
|             | cell death                                          | 151  | 3  | 0.00271  |
|             | cytoskeletal protein binding                        | 156  | 4  | 0.00433  |
| <b>HNSC</b> | nucleic acid binding transcription factor activity  | 240  | 7  | 2.62E-23 |
|             | Fc-epsilon receptor signaling pathway               | 63   | 7  | 5.22E-23 |
|             | neurotrophin TRK receptor signaling pathway         | 91   | 8  | 5.36E-21 |
|             | gene expression                                     | 169  | 9  | 3.11E-18 |
|             | molecular_function                                  | 3534 | 10 | 4.07E-18 |
|             | cellular protein modification process               | 647  | 11 | 9.45E-19 |
|             | biosynthetic process                                | 983  | 11 | 3.62E-17 |
|             | ion binding                                         | 1559 | 12 | 1.93E-17 |

|                                                      |      |    |          |
|------------------------------------------------------|------|----|----------|
| organelle                                            | 2495 | 12 | 2.51E-16 |
| cellular nitrogen compound metabolic process         | 1231 | 13 | 1.80E-16 |
| cellular_component                                   | 3144 | 8  | 1.11E-16 |
| enzyme binding                                       | 322  | 8  | 1.11E-16 |
| protein complex                                      | 760  | 6  | 8.88E-16 |
| epidermal growth factor receptor signaling pathway   | 72   | 8  | 5.02E-14 |
| blood coagulation                                    | 134  | 8  | 2.18E-13 |
| cytosol                                              | 509  | 6  | 3.68E-12 |
| transcription, DNA-templated                         | 117  | 2  | 1.53E-11 |
| protein binding transcription factor activity        | 140  | 7  | 3.05E-11 |
| catabolic process                                    | 321  | 4  | 5.96E-09 |
| nucleoplasm                                          | 174  | 3  | 2.63E-08 |
| fibroblast growth factor receptor signaling pathway  | 59   | 6  | 1.02E-07 |
| symbiosis, encompassing mutualism through parasitism | 118  | 5  | 2.09E-07 |
| nucleobase-containing compound catabolic process     | 144  | 3  | 1.59E-06 |
| small molecule metabolic process                     | 264  | 4  | 2.91E-06 |
| viral process                                        | 106  | 5  | 3.21E-06 |
| cellular component assembly                          | 186  | 3  | 2.09E-05 |
| biological_process                                   | 1946 | 3  | 2.22E-05 |
| synaptic transmission                                | 87   | 5  | 2.38E-05 |
| platelet activation                                  | 50   | 4  | 0.00014  |
| phosphatidylinositol-mediated signaling              | 34   | 4  | 0.00045  |
| regulation of transcription, DNA-templated           | 62   | 1  | 0.00051  |
| cytoskeletal protein binding                         | 93   | 2  | 0.00122  |
| cellular protein metabolic process                   | 69   | 3  | 0.00323  |
| macromolecular complex assembly                      | 97   | 2  | 0.00348  |
| response to stress                                   | 180  | 3  | 0.00437  |
| nucleic acid binding                                 | 54   | 1  | 0.00449  |
| <b>KIRC</b> molecular_function                       | 2909 | 7  | 1.56E-24 |
| cellular_component                                   | 2662 | 7  | 2.69E-23 |
| nucleic acid binding transcription factor activity   | 231  | 8  | 1.48E-20 |
| cellular protein modification process                | 538  | 8  | 4.75E-20 |
| biosynthetic process                                 | 837  | 10 | 3.86E-19 |
| cellular nitrogen compound metabolic process         | 1028 | 11 | 2.96E-18 |
| ion binding                                          | 1328 | 11 | 4.00E-17 |
| organelle                                            | 2049 | 13 | 6.27E-18 |
| Fc-epsilon receptor signaling pathway                | 55   | 5  | 2.22E-16 |
| neurotrophin TRK receptor signaling pathway          | 68   | 5  | 4.44E-16 |
| epidermal growth factor receptor signaling pathway   | 65   | 5  | 2.44E-15 |
| gene expression                                      | 131  | 6  | 1.20E-12 |

|             |                                                                 |      |    |          |
|-------------|-----------------------------------------------------------------|------|----|----------|
|             | protein binding transcription factor activity                   | 115  | 6  | 2.74E-10 |
|             | protein complex                                                 | 500  | 4  | 1.12E-08 |
|             | enzyme binding                                                  | 212  | 5  | 1.59E-07 |
|             | catabolic process                                               | 179  | 3  | 2.16E-07 |
|             | synaptic transmission                                           | 80   | 4  | 4.43E-07 |
|             | nervous system development                                      | 23   | 2  | 5.09E-07 |
|             | transcription, DNA-templated                                    | 337  | 5  | 9.21E-07 |
|             | biological_process                                              | 2416 | 5  | 1.53E-06 |
|             | fibroblast growth factor receptor signaling pathway             | 53   | 5  | 3.33E-06 |
|             | cytosol                                                         | 380  | 4  | 4.32E-06 |
|             | homophilic cell adhesion via plasma membrane adhesion molecules | 19   | 2  | 3.18E-05 |
|             | cellular component assembly                                     | 163  | 3  | 8.19E-05 |
|             | axon guidance                                                   | 90   | 3  | 0.00013  |
|             | cell-cell signaling                                             | 115  | 4  | 0.00014  |
|             | blood coagulation                                               | 77   | 4  | 0.00026  |
|             | symbiosis, encompassing mutualism through parasitism            | 77   | 3  | 0.00032  |
|             | small molecule metabolic process                                | 303  | 4  | 0.00085  |
|             | nucleoplasm                                                     | 165  | 3  | 0.00129  |
|             | macromolecular complex assembly                                 | 129  | 4  | 0.00132  |
|             | viral process                                                   | 66   | 3  | 0.00178  |
|             | phosphatidylinositol-mediated signaling                         | 31   | 4  | 0.00209  |
|             | response to stress                                              | 235  | 2  | 0.00241  |
|             | cell death                                                      | 95   | 2  | 0.00849  |
|             | cell adhesion                                                   | 32   | 2  | 0.02661  |
|             | nucleobase-containing compound catabolic process                | 63   | 2  | 0.03911  |
|             | protein complex assembly                                        | 65   | 1  | 0.04679  |
|             | enzyme regulator activity                                       | 69   | 2  | 0.04702  |
| <b>KIRP</b> | molecular_function                                              | 2322 | 5  | 1.27E-20 |
|             | neurotrophin TRK receptor signaling pathway                     | 76   | 6  | 3.07E-20 |
|             | cellular protein modification process                           | 515  | 8  | 2.36E-19 |
|             | gene expression                                                 | 160  | 9  | 1.97E-18 |
|             | ion binding                                                     | 1357 | 9  | 3.88E-17 |
|             | biosynthetic process                                            | 934  | 10 | 4.81E-18 |
|             | cellular nitrogen compound metabolic process                    | 1137 | 10 | 4.44E-17 |
|             | organelle                                                       | 2205 | 10 | 1.52E-16 |
|             | nucleic acid binding transcription factor activity              | 189  | 5  | 2.66E-15 |
|             | protein complex                                                 | 634  | 5  | 1.09E-14 |
|             | cellular_component                                              | 2227 | 4  | 1.39E-14 |
|             | Fc-epsilon receptor signaling pathway                           | 45   | 5  | 5.80E-14 |



|              |                                                          |      |   |          |
|--------------|----------------------------------------------------------|------|---|----------|
|              | cytosol                                                  | 370  | 3 | 3.87E-12 |
|              | biological_process                                       | 1506 | 2 | 2.76E-11 |
|              | epidermal growth factor receptor signaling pathway       | 62   | 5 | 9.95E-11 |
|              | nucleoplasm                                              | 189  | 4 | 4.63E-10 |
|              | enzyme binding                                           | 192  | 3 | 1.16E-09 |
|              | symbiosis, encompassing mutualism through parasitism     | 86   | 3 | 2.12E-07 |
|              | catabolic process                                        | 306  | 5 | 3.35E-07 |
|              | blood coagulation                                        | 95   | 5 | 5.69E-07 |
|              | fibroblast growth factor receptor signaling pathway      | 51   | 4 | 2.18E-06 |
|              | RNA binding                                              | 273  | 4 | 6.25E-06 |
|              | viral process                                            | 75   | 3 | 7.37E-06 |
|              | cellular component assembly                              | 180  | 3 | 8.81E-06 |
|              | small molecule metabolic process                         | 379  | 5 | 1.28E-05 |
|              | protein binding transcription factor activity            | 75   | 3 | 1.48E-05 |
|              | macromolecular complex assembly                          | 144  | 4 | 2.13E-05 |
|              | transcription, DNA-templated                             | 191  | 2 | 2.34E-05 |
|              | mitotic cell cycle                                       | 68   | 4 | 0.00024  |
|              | membrane organization                                    | 92   | 4 | 0.00027  |
|              | response to stress                                       | 261  | 4 | 0.00029  |
|              | phosphatidylinositol-mediated signaling                  | 33   | 3 | 0.00034  |
|              | cytoskeletal protein binding                             | 98   | 3 | 0.0004   |
|              | protein complex assembly                                 | 97   | 3 | 0.00112  |
|              | nervous system development                               | 41   | 2 | 0.00189  |
|              | cell death                                               | 106  | 2 | 0.0022   |
| <b>LIHCC</b> | transcription, DNA-templated                             | 790  | 6 | 3.80E-25 |
|              | transcription initiation from RNA polymerase II promoter | 90   | 6 | 8.84E-25 |
|              | protein complex assembly                                 | 250  | 6 | 1.11E-24 |
|              | cytoskeletal protein binding                             | 249  | 6 | 1.36E-24 |
|              | enzyme regulator activity                                | 280  | 6 | 3.16E-24 |
|              | epidermal growth factor receptor signaling pathway       | 95   | 7 | 4.55E-24 |
|              | blood coagulation                                        | 178  | 7 | 1.55E-23 |
|              | fibroblast growth factor receptor signaling pathway      | 79   | 7 | 2.61E-23 |
|              | immune system process                                    | 463  | 8 | 4.94E-22 |
|              | DNA metabolic process                                    | 271  | 8 | 1.08E-21 |
|              | mRNA metabolic process                                   | 104  | 8 | 4.73E-21 |
|              | Fc-epsilon receptor signaling pathway                    | 79   | 8 | 7.67E-21 |
|              | mitotic cell cycle                                       | 214  | 9 | 8.60E-21 |
|              | nucleic acid binding transcription factor activity       | 373  | 9 | 2.00E-20 |
|              | cell death                                               | 374  | 9 | 2.64E-20 |

|                                                            |      |    |          |
|------------------------------------------------------------|------|----|----------|
| RNA metabolic process                                      | 113  | 9  | 4.37E-20 |
| membrane organization                                      | 256  | 9  | 7.83E-20 |
| protein binding transcription factor activity              | 229  | 10 | 9.93E-20 |
| cellular component assembly                                | 462  | 10 | 1.09E-19 |
| cellular protein metabolic process                         | 214  | 10 | 1.43E-19 |
| neurotrophin TRK receptor signaling pathway                | 136  | 10 | 2.49E-19 |
| response to stress                                         | 780  | 11 | 3.92E-19 |
| nucleobase-containing compound catabolic process           | 368  | 11 | 7.90E-19 |
| small molecule metabolic process                           | 842  | 11 | 1.49E-18 |
| macromolecular complex assembly                            | 335  | 11 | 1.84E-18 |
| catabolic process                                          | 755  | 12 | 2.38E-18 |
| ion binding                                                | 2071 | 12 | 2.77E-18 |
| biological_process                                         | 4973 | 13 | 4.40E-18 |
| molecular_function                                         | 5196 | 14 | 5.51E-18 |
| cellular_component                                         | 5145 | 14 | 1.01E-17 |
| nucleoplasm                                                | 565  | 14 | 1.41E-17 |
| cellular protein modification process                      | 970  | 14 | 2.17E-17 |
| protein complex                                            | 1429 | 14 | 3.83E-17 |
| cytosol                                                    | 1124 | 15 | 3.92E-17 |
| biosynthetic process                                       | 1584 | 15 | 5.95E-17 |
| viral process                                              | 284  | 15 | 6.04E-17 |
| enzyme binding                                             | 572  | 15 | 1.98E-16 |
| poly(A) RNA binding                                        | 634  | 15 | 2.17E-16 |
| RNA binding                                                | 778  | 16 | 2.67E-16 |
| gene expression                                            | 354  | 16 | 2.86E-16 |
| symbiosis, encompassing mutualism through parasitism       | 317  | 16 | 3.13E-16 |
| cellular nitrogen compound metabolic process               | 1942 | 17 | 3.53E-16 |
| organelle                                                  | 3811 | 19 | 7.66E-16 |
| transforming growth factor beta receptor signaling pathway | 82   | 5  | 1.25E-15 |
| platelet activation                                        | 74   | 6  | 3.14E-13 |
| TRIF-dependent toll-like receptor signaling pathway        | 40   | 6  | 6.62E-13 |
| post-translational protein modification                    | 74   | 6  | 2.35E-12 |
| microtubule organizing center                              | 174  | 6  | 6.78E-12 |
| mRNA processing                                            | 185  | 7  | 2.16E-11 |
| MyD88-independent toll-like receptor signaling pathway     | 41   | 6  | 4.87E-11 |
| phosphatidylinositol-mediated signaling                    | 51   | 5  | 8.88E-11 |
| toll-like receptor 10 signaling pathway                    | 33   | 6  | 1.94E-10 |
| platelet degranulation                                     | 34   | 5  | 2.97E-10 |

|                                                                                                              |     |   |          |
|--------------------------------------------------------------------------------------------------------------|-----|---|----------|
| innate immune response                                                                                       | 202 | 5 | 3.21E-10 |
| Fc-gamma receptor signaling pathway involved in phagocytosis                                                 | 38  | 5 | 3.80E-10 |
| small conjugating protein binding                                                                            | 42  | 4 | 4.73E-10 |
| toll-like receptor TLR1:TLR2 signaling pathway                                                               | 33  | 5 | 5.38E-10 |
| toll-like receptor TLR6:TLR2 signaling pathway                                                               | 33  | 5 | 5.38E-10 |
| intrinsic apoptotic signaling pathway                                                                        | 34  | 6 | 6.79E-10 |
| toll-like receptor 3 signaling pathway                                                                       | 43  | 6 | 8.38E-10 |
| transcription from RNA polymerase II promoter                                                                | 211 | 7 | 3.45E-09 |
| mitotic nuclear envelope disassembly                                                                         | 26  | 5 | 7.33E-09 |
| RNA splicing                                                                                                 | 116 | 6 | 9.93E-09 |
| transcription factor binding                                                                                 | 169 | 4 | 1.03E-08 |
| G2/M transition of mitotic cell cycle                                                                        | 69  | 6 | 1.05E-08 |
| toll-like receptor 5 signaling pathway                                                                       | 32  | 5 | 1.70E-08 |
| toll-like receptor 9 signaling pathway                                                                       | 34  | 5 | 2.39E-08 |
| cellular component disassembly involved in execution phase of apoptosis                                      | 28  | 6 | 7.29E-08 |
| ribonucleoprotein complex assembly                                                                           | 53  | 4 | 1.10E-07 |
| nucleocytoplasmic transport                                                                                  | 109 | 5 | 1.15E-07 |
| cell cycle                                                                                                   | 233 | 5 | 2.55E-07 |
| toll-like receptor 4 signaling pathway                                                                       | 45  | 6 | 2.68E-07 |
| hexose transport                                                                                             | 24  | 6 | 2.82E-07 |
| activation of signaling protein activity involved in unfolded protein response                               | 39  | 5 | 4.60E-07 |
| stress-activated MAPK cascade                                                                                | 25  | 4 | 6.84E-07 |
| toll-like receptor signaling pathway                                                                         | 45  | 5 | 6.86E-07 |
| protein N-linked glycosylation via asparagine                                                                | 45  | 6 | 7.95E-07 |
| viral life cycle                                                                                             | 46  | 5 | 2.30E-06 |
| nuclear-transcribed mRNA catabolic process, deadenylation-dependent decay                                    | 25  | 6 | 2.45E-06 |
| insulin receptor signaling pathway                                                                           | 56  | 3 | 3.18E-06 |
| toll-like receptor 2 signaling pathway                                                                       | 34  | 5 | 4.63E-06 |
| regulation of transcription from RNA polymerase II promoter in response to hypoxia                           | 18  | 6 | 4.83E-06 |
| positive regulation of protein insertion into mitochondrial membrane involved in apoptotic signaling pathway | 18  | 6 | 7.79E-06 |
| cellular lipid metabolic process                                                                             | 54  | 4 | 1.01E-05 |
| cellular component movement                                                                                  | 44  | 4 | 1.34E-05 |
| regulation of glucose transport                                                                              | 21  | 5 | 2.61E-05 |
| cell junction organization                                                                                   | 47  | 4 | 3.38E-05 |
| G1/S transition of mitotic cell cycle                                                                        | 66  | 6 | 4.33E-05 |

|             |                                                                                               |      |    |          |
|-------------|-----------------------------------------------------------------------------------------------|------|----|----------|
|             | vesicle-mediated transport                                                                    | 269  | 4  | 4.58E-05 |
|             | in utero embryonic development                                                                | 124  | 6  | 7.73E-05 |
|             | mRNA splicing, via spliceosome                                                                | 55   | 2  | 0.00011  |
|             | protein targeting                                                                             | 51   | 1  | 0.00016  |
|             | focal adhesion                                                                                | 144  | 4  | 0.00019  |
|             | cell cycle arrest                                                                             | 59   | 4  | 0.00029  |
|             | chromatin organization                                                                        | 55   | 5  | 0.00037  |
|             | cellular response to hypoxia                                                                  | 45   | 3  | 0.0005   |
|             | cytoskeleton organization                                                                     | 144  | 2  | 0.00071  |
|             | termination of RNA polymerase II transcription                                                | 24   | 3  | 0.0015   |
|             | apoptotic signaling pathway                                                                   | 40   | 2  | 0.00176  |
|             | transcription coactivator activity                                                            | 104  | 4  | 0.00231  |
|             | axon guidance                                                                                 | 96   | 2  | 0.00238  |
|             | DNA damage response, signal transduction by p53 class mediator resulting in cell cycle arrest | 30   | 4  | 0.00253  |
|             | extracellular matrix disassembly                                                              | 31   | 4  | 0.00287  |
|             | positive regulation of apoptotic process                                                      | 102  | 3  | 0.00463  |
| <b>LUAD</b> | cellular_component                                                                            | 3483 | 8  | 1.37E-22 |
|             | protein binding transcription factor activity                                                 | 155  | 9  | 2.35E-20 |
|             | molecular_function                                                                            | 3472 | 9  | 6.03E-19 |
|             | nucleic acid binding transcription factor activity                                            | 282  | 10 | 7.41E-19 |
|             | gene expression                                                                               | 207  | 13 | 7.44E-19 |
|             | cellular protein modification process                                                         | 843  | 18 | 7.91E-19 |
|             | cellular nitrogen compound metabolic process                                                  | 1610 | 21 | 2.76E-18 |
|             | biosynthetic process                                                                          | 1384 | 22 | 3.02E-18 |
|             | ion binding                                                                                   | 2139 | 22 | 5.44E-18 |
|             | organelle                                                                                     | 3447 | 24 | 1.25E-17 |
|             | blood coagulation                                                                             | 139  | 8  | 7.77E-16 |
|             | neurotrophin TRK receptor signaling pathway                                                   | 87   | 8  | 1.11E-15 |
|             | protein complex                                                                               | 759  | 6  | 1.33E-15 |
|             | enzyme binding                                                                                | 327  | 8  | 4.05E-13 |
|             | Fc-epsilon receptor signaling pathway                                                         | 59   | 8  | 7.57E-11 |
|             | transcription, DNA-templated                                                                  | 444  | 6  | 8.43E-11 |
|             | cellular component assembly                                                                   | 260  | 5  | 4.16E-10 |
|             | nucleoplasm                                                                                   | 252  | 7  | 3.74E-09 |
|             | cytosol                                                                                       | 494  | 5  | 4.75E-08 |
|             | symbiosis, encompassing mutualism through parasitism                                          | 143  | 7  | 5.81E-08 |
|             | viral process                                                                                 | 130  | 7  | 6.02E-07 |
|             | cytoskeletal protein binding                                                                  | 154  | 5  | 1.04E-06 |
|             | small molecule metabolic process                                                              | 456  | 6  | 1.42E-05 |

|             |                                                     |      |    |          |
|-------------|-----------------------------------------------------|------|----|----------|
|             | biological_process                                  | 2374 | 5  | 6.28E-05 |
|             | catabolic process                                   | 339  | 5  | 0.00012  |
|             | macromolecular complex assembly                     | 153  | 4  | 0.00015  |
|             | epidermal growth factor receptor signaling pathway  | 48   | 4  | 0.00251  |
|             | nucleobase-containing compound catabolic process    | 122  | 3  | 0.00352  |
| <b>LUSC</b> | molecular_function                                  | 3331 | 9  | 2.69E-19 |
|             | cellular protein modification process               | 600  | 9  | 9.83E-19 |
|             | biosynthetic process                                | 949  | 11 | 2.34E-18 |
|             | cellular nitrogen compound metabolic process        | 1159 | 12 | 4.31E-16 |
|             | organelle                                           | 2294 | 12 | 5.61E-16 |
|             | ion binding                                         | 1451 | 13 | 6.67E-16 |
|             | cellular_component                                  | 2483 | 5  | 2.77E-13 |
|             | gene expression                                     | 138  | 8  | 3.51E-12 |
|             | nucleic acid binding transcription factor activity  | 185  | 6  | 1.42E-11 |
|             | neurotrophin TRK receptor signaling pathway         | 67   | 6  | 1.51E-11 |
|             | small molecule metabolic process                    | 431  | 5  | 1.19E-10 |
|             | protein binding transcription factor activity       | 67   | 4  | 9.02E-10 |
|             | protein complex                                     | 664  | 5  | 1.90E-09 |
|             | cytosol                                             | 392  | 5  | 1.61E-08 |
|             | Fc-epsilon receptor signaling pathway               | 44   | 6  | 2.15E-08 |
|             | catabolic process                                   | 309  | 4  | 1.15E-06 |
|             | biological_process                                  | 2448 | 4  | 1.69E-06 |
|             | epidermal growth factor receptor signaling pathway  | 50   | 5  | 5.67E-06 |
|             | enzyme binding                                      | 267  | 6  | 1.84E-05 |
|             | nucleoplasm                                         | 98   | 4  | 2.65E-05 |
|             | cytoskeletal protein binding                        | 145  | 3  | 8.45E-05 |
|             | response to stress                                  | 191  | 4  | 9.22E-05 |
|             | blood coagulation                                   | 68   | 3  | 0.00034  |
|             | transcription, DNA-templated                        | 325  | 4  | 0.00058  |
|             | phosphatidylinositol-mediated signaling             | 45   | 6  | 0.00064  |
|             | cellular component assembly                         | 184  | 3  | 0.00147  |
|             | fibroblast growth factor receptor signaling pathway | 43   | 4  | 0.00249  |
|             | synaptic transmission                               | 67   | 3  | 0.00924  |
| <b>READ</b> | molecular_function                                  | 2659 | 4  | 1.34E-19 |
|             | nucleic acid binding transcription factor activity  | 235  | 6  | 8.73E-19 |
|             | cellular protein modification process               | 558  | 6  | 2.26E-18 |
|             | biosynthetic process                                | 796  | 6  | 3.06E-18 |
|             | ion binding                                         | 1332 | 8  | 2.05E-16 |
|             | cellular nitrogen compound metabolic process        | 1039 | 9  | 2.28E-16 |
|             | organelle                                           | 2166 | 10 | 2.55E-16 |

|                                                          |      |    |          |
|----------------------------------------------------------|------|----|----------|
| cellular_component                                       | 2658 | 4  | 2.20E-14 |
| neurotrophin TRK receptor signaling pathway              | 61   | 3  | 1.18E-13 |
| Fc-epsilon receptor signaling pathway                    | 44   | 3  | 1.11E-12 |
| gene expression                                          | 120  | 5  | 4.28E-12 |
| protein binding transcription factor activity            | 98   | 4  | 7.91E-12 |
| cytoskeletal protein binding                             | 163  | 3  | 3.50E-11 |
| enzyme binding                                           | 252  | 4  | 7.67E-11 |
| transcription, DNA-templated                             | 216  | 3  | 1.17E-10 |
| blood coagulation                                        | 93   | 3  | 4.57E-10 |
| protein complex                                          | 592  | 3  | 1.68E-09 |
| nucleoplasm                                              | 181  | 4  | 8.03E-09 |
| cellular component assembly                              | 235  | 3  | 1.23E-08 |
| biological_process                                       | 2416 | 3  | 1.07E-07 |
| cytosol                                                  | 440  | 3  | 2.70E-07 |
| enzyme regulator activity                                | 124  | 2  | 3.35E-07 |
| epidermal growth factor receptor signaling pathway       | 48   | 3  | 3.44E-06 |
| macromolecular complex assembly                          | 74   | 1  | 2.32E-05 |
| transcription initiation from RNA polymerase II promoter | 45   | 3  | 5.12E-05 |
| cell-cell signaling                                      | 79   | 2  | 0.00017  |
| synaptic transmission                                    | 47   | 1  | 0.00018  |
| protein complex assembly                                 | 66   | 1  | 0.00028  |
| cell death                                               | 130  | 3  | 0.00061  |
| symbiosis, encompassing mutualism through parasitism     | 61   | 2  | 0.00069  |
| viral process                                            | 54   | 2  | 0.00094  |
| platelet activation                                      | 38   | 3  | 0.00416  |
| <b>SKCM</b> cellular_component                           | 4014 | 9  | 1.04E-20 |
| neurotrophin TRK receptor signaling pathway              | 101  | 9  | 3.68E-19 |
| nucleic acid binding transcription factor activity       | 337  | 10 | 4.66E-19 |
| gene expression                                          | 182  | 10 | 4.82E-19 |
| Fc-epsilon receptor signaling pathway                    | 85   | 10 | 9.75E-19 |
| molecular_function                                       | 4772 | 13 | 2.00E-18 |
| cellular protein modification process                    | 833  | 14 | 3.73E-18 |
| biosynthetic process                                     | 1384 | 15 | 5.97E-18 |
| ion binding                                              | 2201 | 18 | 1.48E-16 |
| organelle                                                | 3503 | 18 | 2.01E-16 |
| cellular nitrogen compound metabolic process             | 1762 | 19 | 2.34E-16 |
| protein complex                                          | 985  | 8  | 5.55E-16 |
| enzyme binding                                           | 399  | 11 | 1.12E-12 |
| small molecule metabolic process                         | 527  | 6  | 1.19E-10 |

|             |                                                      |      |    |          |
|-------------|------------------------------------------------------|------|----|----------|
|             | protein binding transcription factor activity        | 152  | 8  | 3.48E-10 |
|             | catabolic process                                    | 427  | 6  | 1.65E-09 |
|             | biological_process                                   | 3565 | 8  | 1.07E-08 |
|             | nucleoplasm                                          | 252  | 7  | 1.41E-08 |
|             | cytosol                                              | 420  | 4  | 3.16E-08 |
|             | cellular component assembly                          | 334  | 7  | 3.17E-08 |
|             | cytoskeletal protein binding                         | 221  | 8  | 1.84E-07 |
|             | symbiosis, encompassing mutualism through parasitism | 108  | 5  | 8.55E-07 |
|             | epidermal growth factor receptor signaling pathway   | 71   | 7  | 8.67E-07 |
|             | transcription, DNA-templated                         | 461  | 5  | 2.06E-06 |
|             | extracellular matrix disassembly                     | 26   | 1  | 2.39E-06 |
|             | phosphatidylinositol-mediated signaling              | 51   | 6  | 2.37E-05 |
|             | viral process                                        | 84   | 4  | 2.55E-05 |
|             | fibroblast growth factor receptor signaling pathway  | 61   | 5  | 3.16E-05 |
|             | extracellular matrix organization                    | 44   | 1  | 6.51E-05 |
|             | endoplasmic reticulum lumen                          | 33   | 1  | 7.25E-05 |
|             | collagen catabolic process                           | 23   | 1  | 0.00026  |
|             | membrane organization                                | 147  | 6  | 0.00095  |
|             | synaptic transmission                                | 90   | 4  | 0.0011   |
| <b>STAD</b> | cytosol                                              | 676  | 8  | 2.11E-26 |
|             | enzyme binding                                       | 385  | 9  | 2.80E-23 |
|             | cellular_component                                   | 4268 | 10 | 4.13E-23 |
|             | nucleoplasm                                          | 368  | 10 | 4.41E-21 |
|             | epidermal growth factor receptor signaling pathway   | 89   | 10 | 1.02E-19 |
|             | protein binding transcription factor activity        | 171  | 11 | 1.11E-19 |
|             | neurotrophin TRK receptor signaling pathway          | 122  | 11 | 1.19E-19 |
|             | gene expression                                      | 217  | 12 | 1.33E-19 |
|             | Fc-epsilon receptor signaling pathway                | 85   | 12 | 3.10E-19 |
|             | nucleic acid binding transcription factor activity   | 393  | 13 | 7.03E-19 |
|             | protein complex                                      | 1112 | 13 | 9.97E-19 |
|             | molecular_function                                   | 4963 | 14 | 1.16E-18 |
|             | biosynthetic process                                 | 1375 | 16 | 3.33E-18 |
|             | ion binding                                          | 2170 | 17 | 1.27E-17 |
|             | cellular protein modification process                | 893  | 18 | 1.02E-16 |
|             | cellular nitrogen compound metabolic process         | 1760 | 19 | 1.18E-16 |
|             | organelle                                            | 3520 | 19 | 1.29E-16 |
|             | blood coagulation                                    | 162  | 10 | 2.22E-16 |
|             | biological_process                                   | 3373 | 7  | 1.28E-14 |
|             | cellular component assembly                          | 360  | 8  | 1.52E-14 |
|             | transcription, DNA-templated                         | 514  | 6  | 5.91E-12 |

|             |                                                              |      |    |          |
|-------------|--------------------------------------------------------------|------|----|----------|
|             | catabolic process                                            | 423  | 6  | 2.01E-11 |
|             | mitotic cell cycle                                           | 85   | 4  | 6.28E-10 |
|             | cell death                                                   | 210  | 5  | 1.79E-09 |
|             | symbiosis, encompassing mutualism through parasitism         | 138  | 6  | 4.82E-09 |
|             | RNA binding                                                  | 257  | 4  | 1.94E-08 |
|             | fibroblast growth factor receptor signaling pathway          | 67   | 7  | 4.43E-08 |
|             | macromolecular complex assembly                              | 210  | 6  | 8.05E-08 |
|             | viral process                                                | 124  | 6  | 1.06E-07 |
|             | response to stress                                           | 323  | 3  | 2.91E-06 |
|             | small molecule metabolic process                             | 477  | 6  | 8.06E-06 |
|             | nervous system development                                   | 58   | 4  | 2.37E-05 |
|             | cytoskeletal protein binding                                 | 114  | 3  | 2.99E-05 |
|             | phosphatidylinositol-mediated signaling                      | 42   | 6  | 3.37E-05 |
|             | synaptic transmission                                        | 72   | 3  | 5.96E-05 |
|             | transcription initiation from RNA polymerase II promoter     | 68   | 7  | 6.46E-05 |
|             | nucleobase-containing compound catabolic process             | 177  | 4  | 9.00E-05 |
|             | cell-cell signaling                                          | 123  | 4  | 0.00011  |
|             | protein complex assembly                                     | 183  | 6  | 0.00018  |
|             | enzyme regulator activity                                    | 178  | 5  | 0.00032  |
|             | post-translational protein modification                      | 28   | 2  | 0.00085  |
|             | axon guidance                                                | 83   | 3  | 0.00425  |
|             | Fc-gamma receptor signaling pathway involved in phagocytosis | 22   | 3  | 0.00997  |
| <b>THCA</b> | transcription, DNA-templated                                 | 305  | 6  | 5.65E-27 |
|             | enzyme binding                                               | 317  | 6  | 2.95E-24 |
|             | nucleic acid binding transcription factor activity           | 266  | 8  | 3.09E-24 |
|             | protein binding transcription factor activity                | 153  | 9  | 1.51E-23 |
|             | cellular_component                                           | 3623 | 11 | 2.11E-22 |
|             | molecular_function                                           | 3655 | 12 | 4.36E-21 |
|             | cellular protein modification process                        | 651  | 12 | 1.75E-20 |
|             | gene expression                                              | 163  | 13 | 8.06E-20 |
|             | cellular nitrogen compound metabolic process                 | 1380 | 18 | 5.87E-19 |
|             | biosynthetic process                                         | 1188 | 19 | 6.24E-19 |
|             | ion binding                                                  | 1767 | 19 | 7.03E-19 |
|             | organelle                                                    | 2787 | 19 | 2.12E-18 |
|             | Fc-epsilon receptor signaling pathway                        | 61   | 6  | 1.11E-16 |
|             | neurotrophin TRK receptor signaling pathway                  | 80   | 7  | 2.22E-16 |
|             | protein complex                                              | 658  | 4  | 4.14E-10 |
|             | blood coagulation                                            | 115  | 5  | 2.73E-09 |



|            |                                                          |      |   |          |
|------------|----------------------------------------------------------|------|---|----------|
|            | cytosol                                                  | 470  | 5 | 4.08E-09 |
|            | nucleoplasm                                              | 175  | 5 | 1.42E-08 |
|            | epidermal growth factor receptor signaling pathway       | 71   | 8 | 2.18E-08 |
|            | biological_process                                       | 2523 | 5 | 2.78E-08 |
|            | cellular component assembly                              | 278  | 6 | 1.54E-06 |
|            | catabolic process                                        | 375  | 5 | 3.80E-05 |
|            | transcription initiation from RNA polymerase II promoter | 43   | 4 | 0.00029  |
|            | phosphatidylinositol-mediated signaling                  | 41   | 5 | 0.00042  |
|            | regulation of transcription, DNA-templated               | 86   | 2 | 0.00044  |
|            | response to stress                                       | 315  | 4 | 0.00047  |
|            | viral process                                            | 86   | 3 | 0.00057  |
|            | post-translational protein modification                  | 41   | 4 | 0.00064  |
|            | cytoskeletal protein binding                             | 140  | 3 | 0.00113  |
|            | small molecule metabolic process                         | 318  | 4 | 0.00155  |
|            | symbiosis, encompassing mutualism through parasitism     | 91   | 3 | 0.00236  |
|            | macromolecular complex assembly                          | 163  | 5 | 0.0028   |
| <b>UVM</b> | molecular_function                                       | 3842 | 3 | 4.49E-24 |
|            | cellular_component                                       | 3650 | 3 | 3.88E-21 |
|            | enzyme binding                                           | 364  | 3 | 1.34E-20 |
|            | protein binding transcription factor activity            | 175  | 4 | 1.94E-20 |
|            | nucleic acid binding transcription factor activity       | 338  | 4 | 5.56E-20 |
|            | nucleoplasm                                              | 390  | 4 | 1.20E-19 |
|            | Fc-epsilon receptor signaling pathway                    | 67   | 4 | 5.73E-19 |
|            | protein complex                                          | 957  | 4 | 5.90E-19 |
|            | neurotrophin TRK receptor signaling pathway              | 100  | 4 | 8.05E-19 |
|            | transcription, DNA-templated                             | 686  | 5 | 9.47E-19 |
|            | biosynthetic process                                     | 1236 | 6 | 3.20E-17 |
|            | gene expression                                          | 217  | 6 | 4.06E-17 |
|            | cellular protein modification process                    | 766  | 7 | 7.19E-17 |
|            | ion binding                                              | 1750 | 7 | 1.60E-16 |
|            | cellular nitrogen compound metabolic process             | 1533 | 8 | 1.63E-15 |
|            | organelle                                                | 2867 | 8 | 1.65E-15 |
|            | epidermal growth factor receptor signaling pathway       | 79   | 3 | 1.96E-13 |
|            | biological_process                                       | 3261 | 1 | 1.61E-12 |
|            | cellular component assembly                              | 324  | 2 | 2.10E-11 |
|            | small molecule metabolic process                         | 537  | 3 | 6.44E-11 |
|            | viral process                                            | 118  | 1 | 7.00E-11 |
|            | symbiosis, encompassing mutualism through parasitism     | 130  | 1 | 7.84E-11 |

|                                                          |     |   |          |
|----------------------------------------------------------|-----|---|----------|
| response to stress                                       | 526 | 3 | 1.23E-10 |
| RNA binding                                              | 441 | 2 | 4.39E-10 |
| catabolic process                                        | 446 | 3 | 1.04E-09 |
| blood coagulation                                        | 133 | 4 | 6.46E-08 |
| cytosol                                                  | 557 | 1 | 8.22E-08 |
| TRIF-dependent toll-like receptor signaling pathway      | 30  | 4 | 3.70E-07 |
| phosphatidylinositol-mediated signaling                  | 53  | 3 | 4.40E-07 |
| MyD88-independent toll-like receptor signaling pathway   | 31  | 4 | 2.33E-06 |
| mitotic cell cycle                                       | 92  | 1 | 2.71E-06 |
| nervous system development                               | 121 | 3 | 1.36E-05 |
| post-translational protein modification                  | 51  | 1 | 1.79E-05 |
| cell death                                               | 211 | 2 | 2.14E-05 |
| fibroblast growth factor receptor signaling pathway      | 58  | 2 | 2.45E-05 |
| cytoskeletal protein binding                             | 197 | 3 | 3.89E-05 |
| macromolecular complex assembly                          | 198 | 2 | 4.27E-05 |
| nucleobase-containing compound catabolic process         | 186 | 1 | 0.00011  |
| transcription initiation from RNA polymerase II promoter | 67  | 2 | 0.00013  |
| toll-like receptor 3 signaling pathway                   | 30  | 4 | 0.00015  |
| toll-like receptor 10 signaling pathway                  | 25  | 3 | 0.00019  |
| toll-like receptor 4 signaling pathway                   | 34  | 3 | 0.00034  |
| cellular protein metabolic process                       | 100 | 1 | 0.00034  |
| positive regulation of transcription, DNA-templated      | 243 | 2 | 0.00055  |
| toll-like receptor TLR1:TLR2 signaling pathway           | 25  | 3 | 0.00059  |
| toll-like receptor TLR6:TLR2 signaling pathway           | 25  | 3 | 0.00059  |
| transcription from RNA polymerase II promoter            | 172 | 2 | 0.001    |
| toll-like receptor 9 signaling pathway                   | 27  | 3 | 0.00183  |
| toll-like receptor 5 signaling pathway                   | 25  | 3 | 0.00186  |
| DNA metabolic process                                    | 167 | 1 | 0.00282  |
| membrane organization                                    | 127 | 1 | 0.005    |

---

## Supplementary References

1. Veerla, S, Lindgren, D, Kvist, A, Frigyesi, A, Staaf, J, Persson, H, *et al.* (2009). MiRNA expression in urothelial carcinomas: important roles of miR-10a, miR-222, miR-125b, miR-7 and miR-452 for tumor stage and metastasis, and frequent homozygous losses of miR-31. *Int J Cancer* **124**: 2236-2242.
2. Browne, BM, Stensland, KD, Patel, CK, Sullivan, T, Burks, EJ, Canes, D, *et al.* (2019). MicroRNA Expression Profiles in Upper Tract Urothelial Carcinoma Differentiate Tumor Grade, Stage, and Survival: Implications for Clinical Decision-Making. *Urology* **123**: 93-100.
3. Ratert, N, Meyer, HA, Jung, M, Mollenkopf, HJ, Wagner, I, Miller, K, *et al.* (2012). Reference miRNAs for miRNAome analysis of urothelial carcinomas. *PLoS One* **7**: e39309.
4. Lin, S-R, Yeh, H-C, Wang, W-J, Ke, H-L, Lin, H-H, Hsu, W-C, *et al.* (2017). MiR-193b Mediates CEBPD-Induced Cisplatin Sensitization Through Targeting ETS1 and Cyclin D1 in Human Urothelial Carcinoma Cells. *Journal of Cellular Biochemistry* **118**: 1563-1573.
5. Blick, C, Ramachandran, A, McCormick, R, Wigfield, S, Cranston, D, Catto, J, *et al.* (2015). Identification of a hypoxia-regulated miRNA signature in bladder cancer and a role for miR-145 in hypoxia-dependent apoptosis. *British journal of cancer* **113**: 634-644.
6. Xiao, H, Li, H, Yu, G, Xiao, W, Hu, J, Tang, K, *et al.* (2014). MicroRNA-10b promotes migration and invasion through KLF4 and HOXD10 in human bladder cancer. *Oncol Rep* **31**: 1832-1838.
7. Zhang, Y, Zhang, D, Lv, J, Wang, S, and Zhang, Q (2018). MiR-125a-5p suppresses bladder cancer progression through targeting FUT4. *Biomed Pharmacother* **108**: 1039-1047.
8. Blick, C, Ramachandran, A, McCormick, R, Wigfield, S, Cranston, D, Catto, J, *et al.* (2015). Identification of a hypoxia-regulated miRNA signature in bladder cancer and a role for miR-145 in hypoxia-dependent apoptosis. *British Journal Of Cancer* **113**: 634.
9. Gottardo, F, Liu, CG, Ferracin, M, Calin, GA, Fassan, M, Bassi, P, *et al.* (2007). Micro-RNA profiling in kidney and bladder cancers. *Urol Oncol* **25**: 387-392.
10. Wang, G, Chan, ES, Kwan, BC, Li, PK, Yip, SK, Szeto, CC, *et al.* (2012). Expression of microRNAs in the urine of patients with bladder cancer. *Clin Genitourin Cancer* **10**: 106-113.
11. Itesako, T, Seki, N, Yoshino, H, Chiyomaru, T, Yamasaki, T, Hidaka, H, *et al.* (2014). The microRNA expression signature of bladder cancer by deep sequencing: the functional significance of the miR-195/497 cluster. *PloS one* **9**: e84311-e84311.
12. Chen, L, Yuan, L, Wang, G, Cao, R, Peng, J, Shu, B, *et al.* (2017). Identification and bioinformatics analysis of miRNAs associated with human muscle invasive bladder cancer. *Molecular medicine reports* **16**: 8709-8720.
13. Korpál, M, Ell, BJ, Buffa, FM, Ibrahim, T, Blanco, MA, Celià-Terrassa, T, *et al.* (2011). Direct targeting of Sec23a by miR-200s influences cancer cell secretome and promotes metastatic colonization. *Nature Medicine* **17**: 1101-1108.
14. Shimono, Y, Zabala, M, Cho, RW, Lobo, N, Dalerba, P, Qian, D, *et al.* (2009). Downregulation of miRNA-200c links breast cancer stem cells with normal stem cells. *Cell* **138**: 592-603.
15. Zhao, Z, Fan, X, Jiang, L, Xu, Z, Xue, L, Zhan, Q, *et al.* (2017). miR-503-3p promotes epithelial-mesenchymal transition in breast cancer by directly targeting SMAD2 and E-cadherin. *J Genet Genomics* **44**: 75-84.
16. Lee, CH, Kuo, WH, Lin, CC, Oyang, YJ, Huang, HC, and Juan, HF (2013). MicroRNA-regulated protein-protein interaction networks and their functions in breast cancer. *Int J Mol Sci* **14**: 11560-11606.
17. Kastl, L, Brown, I, and Schofield, AC (2012). miRNA-34a is associated with docetaxel resistance in human breast cancer cells. *Breast Cancer Res Treat* **131**: 445-454.

18. Damavandi, Z, Torkashvand, S, Vasei, M, Soltani, BM, Tavallaei, M, and Mowla, SJ (2016). Aberrant Expression of Breast Development-Related MicroRNAs, miR-22, miR-132, and miR-212, in Breast Tumor Tissues. *J Breast Cancer* **19**: 148-155.
19. Mohammadi-Yeganeh, S, Paryan, M, Mirab Samiee, S, Soleimani, M, Arefian, E, Azadmanesh, K, *et al.* (2013). Development of a robust, low cost stem-loop real-time quantification PCR technique for miRNA expression analysis. *Mol Biol Rep* **40**: 3665-3674.
20. Bhaumik, D, Scott, GK, Schokrpur, S, Patil, CK, Campisi, J, and Benz, CC (2008). Expression of microRNA-146 suppresses NF-kappaB activity with reduction of metastatic potential in breast cancer cells. *Oncogene* **27**: 5643-5647.
21. Luo, EC, Chang, YC, Sher, YP, Huang, WY, Chuang, LL, Chiu, YC, *et al.* (2014). MicroRNA-769-3p down-regulates NDRG1 and enhances apoptosis in MCF-7 cells during reoxygenation. *Sci Rep* **4**: 5908.
22. Pichler, M, Stiegelbauer, V, Vychytilova-Faltejskova, P, Ivan, C, Ling, H, Winter, E, *et al.* (2017). Genome-Wide miRNA Analysis Identifies miR-188-3p as a Novel Prognostic Marker and Molecular Factor Involved in Colorectal Carcinogenesis. *Clinical cancer research : an official journal of the American Association for Cancer Research* **23**: 1323-1333.
23. Sun, JY, Huang, Y, Li, JP, Zhang, X, Wang, L, Meng, YL, *et al.* (2012). MicroRNA-320a suppresses human colon cancer cell proliferation by directly targeting beta-catenin. *Biochem Biophys Res Commun* **420**: 787-792.
24. Zhang, Y, Li, M, Ding, Y, Fan, Z, Zhang, J, Zhang, H, *et al.* (2017). Serum MicroRNA profile in patients with colon adenomas or cancer. *BMC medical genomics* **10**: 23-23.
25. Song, B, Wang, Y, Xi, Y, Kudo, K, Bruheim, S, Botchkina, GI, *et al.* (2009). Mechanism of chemoresistance mediated by miR-140 in human osteosarcoma and colon cancer cells. *Oncogene* **28**: 4065-4074.
26. Yu, G, Tang, J-q, Tian, M-l, Li, H, Wang, X, Wu, T, *et al.* (2012). Prognostic values of the miR-17-92 cluster and its paralogs in colon cancer. *Journal of Surgical Oncology* **106**: 232-237.
27. Weber, D, Amar, L, Gödde, D, and Prinz, C (2018). Extensive screening of microRNA populations identifies hsa-miR-375 and hsa-miR-133a-3p as selective markers for human rectal and colon cancer. *Oncotarget* **9**: 27256-27267.
28. Tao, K, Yang, J, Guo, Z, Hu, Y, Sheng, H, Gao, H, *et al.* (2014). Prognostic value of miR-221-3p, miR-342-3p and miR-491-5p expression in colon cancer. *American journal of translational research* **6**: 391-401.
29. Liu, S-G, Qin, X-G, Zhao, B-S, Qi, B, Yao, W-J, Wang, T-Y, *et al.* (2013). Differential expression of miRNAs in esophageal cancer tissue. *Oncology letters* **5**: 1639-1642.
30. Slaby, O, Srovnal, J, Radova, L, Gregar, J, Juracek, J, Luzna, P, *et al.* (2015). Dynamic changes in microRNA expression profiles reflect progression of Barrett's esophagus to esophageal adenocarcinoma. *Carcinogenesis* **36**: 521-527.
31. Byrnes, KA, Phatak, P, Mansour, D, Xiao, L, Zou, T, Rao, JN, *et al.* (2016). Overexpression of miR-199a-5p decreases esophageal cancer cell proliferation through repression of mitogen-activated protein kinase kinase kinase-11 (MAP3K11). *Oncotarget* **7**: 8756-8770.
32. Streppel, MM, Pai, S, Campbell, NR, Hu, C, Yabuuchi, S, Canto, MI, *et al.* (2013). MicroRNA 223 is upregulated in the multistep progression of Barrett's esophagus and modulates sensitivity to chemotherapy by targeting PARP1. *Clin Cancer Res* **19**: 4067-4078.
33. Sun, Q, Zong, L, Zhang, H, Deng, Y, Zhang, C, and Zhang, L (2018). A 10-microRNA prognosis scoring system in esophageal squamous cell carcinoma constructed using bioinformatic methods. *Molecular medicine reports* **17**: 5222-5228.
34. Su, H, Jin, X, Zhang, X, Xue, S, Deng, X, Shen, L, *et al.* (2014). Identification of microRNAs involved in the radioresistance of esophageal cancer cells. *Cell Biology International* **38**: 318-325.

35. Komatsu, S, Ichikawa, D, Kawaguchi, T, Takeshita, H, Miyamae, M, Ohashi, T, *et al.* (2016). Plasma microRNA profiles: identification of miR-23a as a novel biomarker for chemoresistance in esophageal squamous cell carcinoma. *Oncotarget* **7**: 62034-62048.
36. Yin, J, Wang, X, Zheng, L, Shi, Y, Wang, L, Shao, A, *et al.* (2013). Hsa-miR-34b/c rs4938723 T>C and hsa-miR-423 rs6505162 C>A Polymorphisms Are Associated with the Risk of Esophageal Cancer in a Chinese Population. *PLOS ONE* **8**: e80570.
37. Yang, H, Gu, J, Wang, KK, Zhang, W, Xing, J, Chen, Z, *et al.* (2009). MicroRNA expression signatures in Barrett's esophagus and esophageal adenocarcinoma. *Clinical cancer research : an official journal of the American Association for Cancer Research* **15**: 5744-5752.
38. Zhang, K, Wu, X, Wang, J, Lopez, J, Zhou, W, Yang, L, *et al.* (2016). Circulating miRNA profile in esophageal adenocarcinoma. *American journal of cancer research* **6**: 2713-2721.
39. Lu, TX, Sherrill, JD, Wen, T, Plassard, AJ, Besse, JA, Abonia, JP, *et al.* (2012). MicroRNA signature in patients with eosinophilic esophagitis, reversibility with glucocorticoids, and assessment as disease biomarkers. *J Allergy Clin Immunol* **129**: 1064-1075.e1069.
40. Lin, C, Liu, A, Zhu, J, Zhang, X, Wu, G, Ren, P, *et al.* (2014). miR-508 sustains phosphoinositide signalling and promotes aggressive phenotype of oesophageal squamous cell carcinoma. *Nature Communications* **5**: 4620.
41. Li, G, Ren, S, Su, Z, Liu, C, Deng, T, Huang, D, *et al.* (2015). Increased expression of miR-93 is associated with poor prognosis in head and neck squamous cell carcinoma. *Tumour Biol* **36**: 3949-3956.
42. Hui, AB, Lenarduzzi, M, Krushel, T, Waldron, L, Pintilie, M, Shi, W, *et al.* (2010). Comprehensive MicroRNA profiling for head and neck squamous cell carcinomas. *Clin Cancer Res* **16**: 1129-1139.
43. Huang, Q, Yang, J, Zheng, J, Hsueh, C, Guo, Y, and Zhou, L (2018). Characterization of selective exosomal microRNA expression profile derived from laryngeal squamous cell carcinoma detected by next generation sequencing. *Oncology reports* **40**: 2584-2594.
44. Ogawa, T, Saiki, Y, Shiga, K, Chen, N, Fukushige, S, Sunamura, M, *et al.* (2012). miR-34a is downregulated in cis-diamminedichloroplatinum treated sinonasal squamous cell carcinoma patients with poor prognosis. *Cancer Sci* **103**: 1737-1743.
45. Saad, MA, Kuo, SZ, Rahimy, E, Zou, AE, Korrapati, A, Rahimy, M, *et al.* (2015). Alcohol-dysregulated miR-30a and miR-934 in head and neck squamous cell carcinoma. *Molecular cancer* **14**: 181-181.
46. Hou, B, Ishinaga, H, Midorikawa, K, Shah, SA, Nakamura, S, Hiraku, Y, *et al.* (2015). Circulating microRNAs as novel prognosis biomarkers for head and neck squamous cell carcinoma. *Cancer biology & therapy* **16**: 1042-1046.
47. Miao, L, Wang, L, Yuan, H, Hang, D, Zhu, L, Du, J, *et al.* (2016). MicroRNA-101 polymorphisms and risk of head and neck squamous cell carcinoma in a Chinese population. *Tumour Biol* **37**: 4169-4174.
48. Koshizuka, K, Hanazawa, T, Fukumoto, I, Kikkawa, N, Matsushita, R, Mataka, H, *et al.* (2017). Dual-receptor (EGFR and c-MET) inhibition by tumor-suppressive miR-1 and miR-206 in head and neck squamous cell carcinoma. *J Hum Genet* **62**: 113-121.
49. Liu, F, Zhao, X, Qian, Y, Zhang, J, Zhang, Y, and Yin, R (2017). MiR-206 inhibits Head and neck squamous cell carcinoma cell progression by targeting HDAC6 via PTEN/AKT/mTOR pathway. *Biomed Pharmacother* **96**: 229-237.
50. Xiao, W, Lou, N, Ruan, H, Bao, L, Xiong, Z, Yuan, C, *et al.* (2017). Mir-144-3p Promotes Cell Proliferation, Metastasis, Sunitinib Resistance in Clear Cell Renal Cell Carcinoma by Downregulating ARID1A. *Cell Physiol Biochem* **43**: 2420-2433.

51. White, NM, Khella, HW, Grigull, J, Adzovic, S, Youssef, YM, Honey, RJ, *et al.* (2011). miRNA profiling in metastatic renal cell carcinoma reveals a tumour-suppressor effect for miR-215. *Br J Cancer* **105**: 1741-1749.
52. Zhou, L, Li, Z, Pan, X, Lai, Y, Quan, J, Zhao, L, *et al.* (2018). Identification of miR-18a-5p as an oncogene and prognostic biomarker in RCC. *Am J Transl Res* **10**: 1874-1886.
53. Khella, HWZ, Butz, H, Ding, Q, Rotondo, F, Evans, KR, Kupchak, P, *et al.* (2015). miR-221/222 Are Involved in Response to Sunitinib Treatment in Metastatic Renal Cell Carcinoma. *Mol Ther* **23**: 1748-1758.
54. Carlsson, J, Christiansen, J, Davidsson, S, Giunchi, F, Fiorentino, M, and Sundqvist, P (2019). The potential role of miR-126, miR-21 and miR-10b as prognostic biomarkers in renal cell carcinoma. *Oncology letters* **17**: 4566-4574.
55. Vergho, DC, Kneitz, S, Kalogirou, C, Burger, M, Krebs, M, Rosenwald, A, *et al.* (2014). Impact of miR-21, miR-126 and miR-221 as Prognostic Factors of Clear Cell Renal Cell Carcinoma with Tumor Thrombus of the Inferior Vena Cava. *PLOS ONE* **9**: e109877.
56. Zaravinos, A, Lambrou, GI, Mourmouras, N, Katafygiotis, P, Papagregoriou, G, Giannikou, K, *et al.* (2014). New miRNA profiles accurately distinguish renal cell carcinomas and upper tract urothelial carcinomas from the normal kidney. *PLoS one* **9**: e91646-e91646.
57. Wulfken, LM, Moritz, R, Ohlmann, C, Holdenrieder, S, Jung, V, Becker, F, *et al.* (2011). MicroRNAs in Renal Cell Carcinoma: Diagnostic Implications of Serum miR-1233 Levels. *PLOS ONE* **6**: e25787.
58. Petillo, D, Kort, EJ, Anema, J, Furge, KA, Yang, XJ, and Teh, BT (2009). MicroRNA profiling of human kidney cancer subtypes. *Int J Oncol* **35**: 109-114.
59. Heinemann, FG, Tolkach, Y, Deng, M, Schmidt, D, Perner, S, Kristiansen, G, *et al.* (2018). Serum miR-122-5p and miR-206 expression: non-invasive prognostic biomarkers for renal cell carcinoma. *Clinical Epigenetics* **10**: 11.
60. Hong, Q, Li, O, Zheng, W, Xiao, W-z, Zhang, L, Wu, D, *et al.* (2017). LncRNA HOTAIR regulates HIF-1 $\alpha$ /AXL signaling through inhibition of miR-217 in renal cell carcinoma. *Cell Death & Disease* **8**: e2772-e2772.
61. Tian, Q, Liang, L, Ding, J, Zha, R, Shi, H, Wang, Q, *et al.* (2012). MicroRNA-550a Acts as a Pro-Metastatic Gene and Directly Targets Cytoplasmic Polyadenylation Element-Binding Protein 4 in Hepatocellular Carcinoma. *PLOS ONE* **7**: e48958.
62. Zheng, J, Sadot, E, Vigidal, JA, Klimstra, DS, Balachandran, VP, Kingham, TP, *et al.* (2018). Characterization of hepatocellular adenoma and carcinoma using microRNA profiling and targeted gene sequencing. *PLoS one* **13**: e0200776-e0200776.
63. Augello, C, Gianelli, U, Savi, F, Moro, A, Bonoldi, E, Gambacorta, M, *et al.* (2014). MicroRNA as potential biomarker in HCV-associated diffuse large B-cell lymphoma. *J Clin Pathol* **67**: 697-701.
64. Shih, TC, Tien, YJ, Wen, CJ, Yeh, TS, Yu, MC, Huang, CH, *et al.* (2012). MicroRNA-214 downregulation contributes to tumor angiogenesis by inducing secretion of the hepatoma-derived growth factor in human hepatoma. *J Hepatol* **57**: 584-591.
65. Gui, J, Tian, Y, Wen, X, Zhang, W, Zhang, P, Gao, J, *et al.* (2011). Serum microRNA characterization identifies miR-885-5p as a potential marker for detecting liver pathologies. *Clin Sci (Lond)* **120**: 183-193.
66. Yu, L, Ding, GF, He, C, Sun, L, Jiang, Y, and Zhu, L (2014). MicroRNA-424 is down-regulated in hepatocellular carcinoma and suppresses cell migration and invasion through c-Myb. *PLoS One* **9**: e91661.
67. Morishita, A, Iwama, H, Fujihara, S, Sakamoto, T, Fujita, K, Tani, J, *et al.* (2016). MicroRNA profiles in various hepatocellular carcinoma cell lines. *Oncology letters* **12**: 1687-1692.

68. Saito, Y, Suzuki, H, Matsuura, M, Sato, A, Kasai, Y, Yamada, K, *et al.* (2011). MicroRNAs in Hepatobiliary and Pancreatic Cancers. *Front Genet* **2**: 66.
69. Xie, F, Yuan, Y, Xie, L, Ran, P, Xiang, X, Huang, Q, *et al.* (2017). miRNA-320a inhibits tumor proliferation and invasion by targeting c-Myc in human hepatocellular carcinoma. *OncoTargets and therapy* **10**: 885-894.
70. Lin, K, Xu, T, He, B-S, Pan, Y-Q, Sun, H-L, Peng, H-X, *et al.* (2016). MicroRNA expression profiles predict progression and clinical outcome in lung adenocarcinoma. *OncoTargets and therapy* **9**: 5679-5692.
71. Leidinger, P, Backes, C, Blatt, M, Keller, A, Huwer, H, Lepper, P, *et al.* (2014). The blood-borne miRNA signature of lung cancer patients is independent of histology but influenced by metastases. *Molecular Cancer* **13**: 202.
72. Othman, N, In, LLA, Harikrishna, JA, and Hasima, N (2013). Bcl-xL Silencing Induces Alterations in hsa-miR-608 Expression and Subsequent Cell Death in A549 and SK-LU1 Human Lung Adenocarcinoma Cells. *PLOS ONE* **8**: e81735.
73. Dacic, S, Kelly, L, Shuai, Y, and Nikiforova, MN (2010). miRNA expression profiling of lung adenocarcinomas: correlation with mutational status. *Modern Pathology* **23**: 1577-1582.
74. Lin, Y, Lv, Y, Liang, R, Yuan, C, Zhang, J, He, D, *et al.* (2017). Four-miRNA signature as a prognostic tool for lung adenocarcinoma. *OncoTargets and therapy* **11**: 29-36.
75. Yang, F, Wei, K, Qin, Z, Liu, W, Shao, C, Wang, C, *et al.* (2018). MiR-598 Suppresses Invasion and Migration by Negative Regulation of Derlin-1 and Epithelial-Mesenchymal Transition in Non-Small Cell Lung Cancer. *Cellular Physiology and Biochemistry* **47**: 245-256.
76. Patnaik, SK, Yendamuri, S, Kannisto, E, Kucharczuk, JC, Singhal, S, and Vachani, A (2012). MicroRNA Expression Profiles of Whole Blood in Lung Adenocarcinoma. *PLOS ONE* **7**: e46045.
77. Galluzzi, L, Morselli, E, Vitale, I, Kepp, O, Senovilla, L, Criollo, A, *et al.* (2010). miR-181a and miR-630 Regulate Cisplatin-Induced Cancer Cell Death. *Cancer Research* **70**: 1793.
78. Ma, Y, Pan, X, Xu, P, Mi, Y, Wang, W, Wu, X, *et al.* (2017). Plasma microRNA alterations between EGFR-activating mutational NSCLC patients with and without primary resistance to TKI. *Oncotarget* **8**: 88529-88536.
79. Lee, J-H, Voortman, J, Dingemans, A-MC, Voeller, DM, Pham, T, Wang, Y, *et al.* (2011). MicroRNA Expression and Clinical Outcome of Small Cell Lung Cancer. *PLOS ONE* **6**: e21300.
80. Ma, J, Mannoor, K, Gao, L, Tan, A, Guarnera, MA, Zhan, M, *et al.* (2014). Characterization of microRNA transcriptome in lung cancer by next-generation deep sequencing. *Molecular Oncology* **8**: 1208-1219.
81. Zhang, K, Zhang, M, Jiang, H, Liu, F, Liu, H, and Li, Y (2018). Down-regulation of miR-214 inhibits proliferation and glycolysis in non-small-cell lung cancer cells via down-regulating the expression of hexokinase 2 and pyruvate kinase isozyme M2. *Biomed Pharmacother* **105**: 545-552.
82. Kim, MK, Jung, SB, Kim, JS, Roh, MS, Lee, JH, Lee, EH, *et al.* (2014). Expression of microRNA miR-126 and miR-200c is associated with prognosis in patients with non-small cell lung cancer. *Virchows Arch* **465**: 463-471.
83. Liu, XG, Zhu, WY, Huang, YY, Ma, LN, Zhou, SQ, Wang, YK, *et al.* (2012). High expression of serum miR-21 and tumor miR-200c associated with poor prognosis in patients with lung cancer. *Med Oncol* **29**: 618-626.
84. Bach, DH, Luu, TT, Kim, D, An, YJ, Park, S, Park, HJ, *et al.* (2018). BMP4 Upregulation Is Associated with Acquired Drug Resistance and Fatty Acid Metabolism in EGFR-Mutant Non-Small-Cell Lung Cancer Cells. *Mol Ther Nucleic Acids* **12**: 817-828.
85. Liu, XH, Lu, KH, Wang, KM, Sun, M, Zhang, EB, Yang, JS, *et al.* (2012). MicroRNA-196a promotes non-small cell lung cancer cell proliferation and invasion through targeting HOXA5. *BMC Cancer* **12**: 348.

86. Edmonds, MD, and Eischen, CM (2014). Differences in miRNA expression in early stage lung adenocarcinomas that did and did not relapse. *PLoS one* **9**: e101802-e101802.
87. Mazar, J, DeYoung, K, Khaitan, D, Meister, E, Almodovar, A, Goydos, J, *et al.* (2010). The regulation of miRNA-211 expression and its role in melanoma cell invasiveness. *PLoS one* **5**: e13779-e13779.
88. Weber, CE, Luo, C, Hotz-Wagenblatt, A, Gardyan, A, Kordass, T, Holland-Letz, T, *et al.* (2016). miR-339-3p Is a Tumor Suppressor in Melanoma. *Cancer Res* **76**: 3562-3571.
89. Lunavat, TR, Cheng, L, Einarsdottir, BO, Olofsson Bagge, R, Veppil Muralidharan, S, Sharples, RA, *et al.* (2017). BRAF(V600) inhibition alters the microRNA cargo in the vesicular secretome of malignant melanoma cells. *Proc Natl Acad Sci U S A* **114**: E5930-e5939.
90. Leidinger, P, Keller, A, Borries, A, Reichrath, J, Rass, K, Jager, SU, *et al.* (2010). High-throughput miRNA profiling of human melanoma blood samples. *BMC Cancer* **10**: 262.
91. Qian, H, Yang, C, and Yang, Y (2017). MicroRNA-26a inhibits the growth and invasiveness of malignant melanoma and directly targets on MITF gene. *Cell Death Discovery* **3**: 17028.
92. Fattore, L, Costantini, S, Malpicci, D, Ruggiero, CF, Ascierio, PA, Croce, CM, *et al.* (2017). MicroRNAs in melanoma development and resistance to target therapy. *Oncotarget* **8**: 22262-22278.
93. Chitsazzadeh, V, Coarfa, C, Drummond, JA, Nguyen, T, Joseph, A, Chilukuri, S, *et al.* (2016). Cross-species identification of genomic drivers of squamous cell carcinoma development across preneoplastic intermediates. *Nat Commun* **7**: 12601.
94. Wang, S, Han, H, Hu, Y, Yang, W, Lv, Y, Wang, L, *et al.* (2018). MicroRNA-130a-3p suppresses cell migration and invasion by inhibition of TBL1XR1-mediated EMT in human gastric carcinoma. *Mol Carcinog* **57**: 383-392.
95. Liu, J, Ma, L, Wang, Z, Wang, L, Liu, C, Chen, R, *et al.* (2014). MicroRNA expression profile of gastric cancer stem cells in the MKN-45 cancer cell line. *Acta Biochimica et Biophysica Sinica* **46**: 92-99.
96. Li, X, Luo, F, Li, Q, Xu, M, Feng, D, Zhang, G, *et al.* (2011). Identification of new aberrantly expressed miRNAs in intestinal-type gastric cancer and its clinical significance. *Oncol Rep* **26**: 1431-1439.
97. Zuo, QF, Zhang, R, Li, BS, Zhao, YL, Zhuang, Y, Yu, T, *et al.* (2015). MicroRNA-141 inhibits tumor growth and metastasis in gastric cancer by directly targeting transcriptional co-activator with PDZ-binding motif, TAZ. *Cell Death Dis* **6**: e1623.
98. Wu, Y-C, Liu, X, Wang, J-L, Chen, X-L, Lei, L, Han, J, *et al.* (2018). Soft-shelled turtle peptide modulates microRNA profile in human gastric cancer AGS cells. *Oncology letters* **15**: 3109-3120.
99. Zhang, QH, Yao, YL, Wu, XY, Wu, JH, Gu, T, Chen, L, *et al.* (2015). Anti-miR-362-3p Inhibits Migration and Invasion of Human Gastric Cancer Cells by Its Target CD82. *Dig Dis Sci* **60**: 1967-1976.
100. Pan, Y, Ren, F, Zhang, W, Liu, G, Yang, D, Hu, J, *et al.* (2014). Regulation of BGC-823 cell sensitivity to adriamycin via miRNA-135a-5p. *Oncol Rep* **32**: 2549-2556.
101. Li, X, Zhang, Y, Zhang, H, Liu, X, Gong, T, Li, M, *et al.* (2011). miRNA-223 promotes gastric cancer invasion and metastasis by targeting tumor suppressor EPB41L3. *Mol Cancer Res* **9**: 824-833.
102. Komatsu, S, Ichikawa, D, Tsujiura, M, Konishi, H, Takeshita, H, Nagata, H, *et al.* (2013). Prognostic impact of circulating miR-21 in the plasma of patients with gastric carcinoma. *Anticancer Res* **33**: 271-276.
103. Song, YX, Yue, ZY, Wang, ZN, Xu, YY, Luo, Y, Xu, HM, *et al.* (2011). MicroRNA-148b is frequently down-regulated in gastric cancer and acts as a tumor suppressor by inhibiting cell proliferation. *Mol Cancer* **10**: 1.



104. Hu, J, Li, C, Liu, C, Zhao, S, Wang, Y, and Fu, Z (2017). Expressions of miRNAs in papillary thyroid carcinoma and their associations with the clinical characteristics of PTC. *Cancer Biomark* **18**: 87-94.
105. Mohamad Yusof, A, Jamal, R, Muhammad, R, Abdullah Suhaimi, SN, Mohamed Rose, I, Saidin, S, *et al.* (2018). Integrated Characterization of MicroRNA and mRNA Transcriptome in Papillary Thyroid Carcinoma. *Frontiers in endocrinology* **9**: 158-158.
106. Swierniak, M, Wojcicka, A, Czetwertynska, M, Stachlewska, E, Maciag, M, Wiechno, W, *et al.* (2013). In-Depth Characterization of the MicroRNA Transcriptome in Normal Thyroid and Papillary Thyroid Carcinoma. *The Journal of Clinical Endocrinology & Metabolism* **98**: E1401-E1409.
107. Wang, C, Lu, S, Jiang, J, Jia, X, Dong, X, and Bu, P (2014). Hsa-microRNA-101 suppresses migration and invasion by targeting Rac1 in thyroid cancer cells. *Oncol Lett* **8**: 1815-1821.
108. Stokowy, T, Wojtaś, B, Krajewska, J, Stobiecka, E, Dralle, H, Musholt, T, *et al.* (2015). A two miRNA classifier differentiates follicular thyroid carcinomas from follicular thyroid adenomas. *Molecular and Cellular Endocrinology* **399**: 43-49.
109. Nikiforova, MN, Gandhi, M, Kelly, L, and Nikiforov, YE (2011). MicroRNA dysregulation in human thyroid cells following exposure to ionizing radiation. *Thyroid : official journal of the American Thyroid Association* **21**: 261-266.
110. Braun, J, Hoang-Vu, C, Dralle, H, and Hüttelmaier, S (2010). Downregulation of microRNAs directs the EMT and invasive potential of anaplastic thyroid carcinomas. *Oncogene* **29**: 4237-4244.
111. Marini, F, Luzi, E, and Brandi, ML (2011). MicroRNA Role in Thyroid Cancer Development. *Journal of thyroid research* **2011**: 407123-407123.
112. Liu, Y, Zhang, Y, Wu, H, Li, Y, Zhang, Y, Liu, M, *et al.* (2017). miR-10a suppresses colorectal cancer metastasis by modulating the epithelial-to-mesenchymal transition and anoikis. *Cell Death Dis* **8**: e2739.
113. Park, YR, Lee, ST, Kim, SL, Liu, YC, Lee, MR, Shin, JH, *et al.* (2016). MicroRNA-9 suppresses cell migration and invasion through downregulation of TM4SF1 in colorectal cancer. *Int J Oncol* **48**: 2135-2143.
114. Gaedcke, J, Grade, M, Camps, J, Sokilde, R, Kaczkowski, B, Schetter, AJ, *et al.* (2012). The rectal cancer microRNAome--microRNA expression in rectal cancer and matched normal mucosa. *Clin Cancer Res* **18**: 4919-4930.
115. Nakano, H, Miyazawa, T, Kinoshita, K, Yamada, Y, and Yoshida, T (2010). Functional screening identifies a microRNA, miR-491 that induces apoptosis by targeting Bcl-XL in colorectal cancer cells. *International Journal of Cancer* **127**: 1072-1080.
116. Tateishi, Y, Okudela, K, Mitsui, H, Umeda, S, Suzuki, T, Kojima, Y, *et al.* (2015). The potential role of microRNA-31 expression in early colorectal cancer. *Pathol Int* **65**: 513-518.
117. Jacob, H, Stanisavljevic, L, Storli, KE, Hestetun, KE, Dahl, O, and Myklebust, MP (2018). A four-microRNA classifier as a novel prognostic marker for tumor recurrence in stage II colon cancer. *Scientific Reports* **8**: 6157.
118. Li, J, Zou, K, Yu, L, Zhao, W, Lu, Y, Mao, J, *et al.* (2018). MicroRNA-140 Inhibits the Epithelial-Mesenchymal Transition and Metastasis in Colorectal Cancer. *Mol Ther Nucleic Acids* **10**: 426-437.
119. Bu, P, Wang, L, Chen, KY, Rakhilin, N, Sun, J, Closa, A, *et al.* (2015). miR-1269 promotes metastasis and forms a positive feedback loop with TGF-beta. *Nat Commun* **6**: 6879.
120. Huang, L, Cai, JL, Huang, PZ, Kang, L, Huang, MJ, Wang, L, *et al.* (2017). miR19b-3p promotes the growth and metastasis of colorectal cancer via directly targeting ITGB8. *American journal of cancer research* **7**: 1996-2008.

121. Robertson, AG, Shih, J, Yau, C, Gibb, EA, Oba, J, Mungall, KL, *et al.* (2017). Integrative Analysis Identifies Four Molecular and Clinical Subsets in Uveal Melanoma. *Cancer Cell* **32**: 204-220.e215.
122. Raghunath, A, and Perumal, E (2015). Micro-RNAs and Their Roles in Eye Disorders. *Ophthalmic Research* **53**: 169-186.
123. Falzone, L, Romano, GL, Salemi, R, Bucolo, C, Tomasello, B, Lupo, G, *et al.* (2019). Prognostic significance of deregulated microRNAs in uveal melanomas. *Molecular medicine reports* **19**: 2599-2610.
124. Zheng, X, Tang, H, Zhao, X, Sun, Y, Jiang, Y, and Liu, Y (2017). Long non-coding RNA FTH1P3 facilitates uveal melanoma cell growth and invasion through miR-224-5p. *PLoS One* **12**: e0184746.
